# Supplementary material for: Twelve thousand years of dust: the Holocene global dust cycle constrained by natural archives
Source: Copernicus journal article supplement (doi:10.5194/cp-11-869-2015), 2015-06-11
Supplement: Supplementary file 1 [file cp-11-869-2015-supplement.zip]

Sample 15

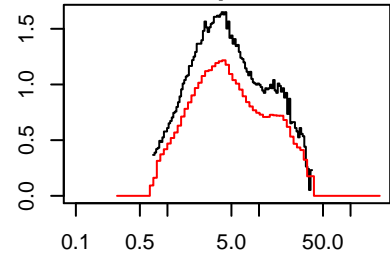

Sample 15 cumulative

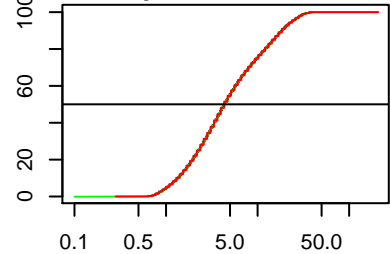

Sample statistics  
Mass conserved = 1  
Median(obs/new) = 4.31 / 4.51  
1%(obs/new) = 0.77 / 0.73  
5%(obs/new) = 1.01 / 1.04  
25%(obs/new) = 2.3 / 2.27  
75%(obs/new) = 9.83 / 9.74  
95%(obs/new) = 24.23 / 24.92  
99%(obs/new) = 31.88 / 32.19

5/25/50/75/95 percentiles

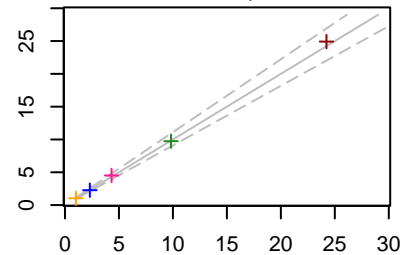

E26.1\_15 percentiles

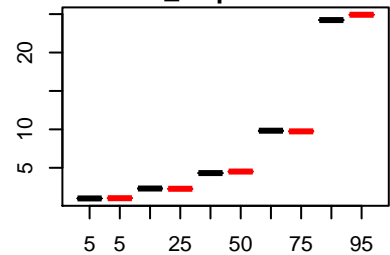

Site statistics  
Percentiles Pearson's corr. = NA  
Mean normalized bias = 0.02
