# Supplementary material for: Twelve thousand years of dust: the Holocene global dust cycle constrained by natural archives
Source: Copernicus journal article supplement (doi:10.5194/cp-11-869-2015), 2015-06-11
Supplement: Supplementary file 2 [file cp-11-869-2015-supplement.zip]

# OC437-07-GC49

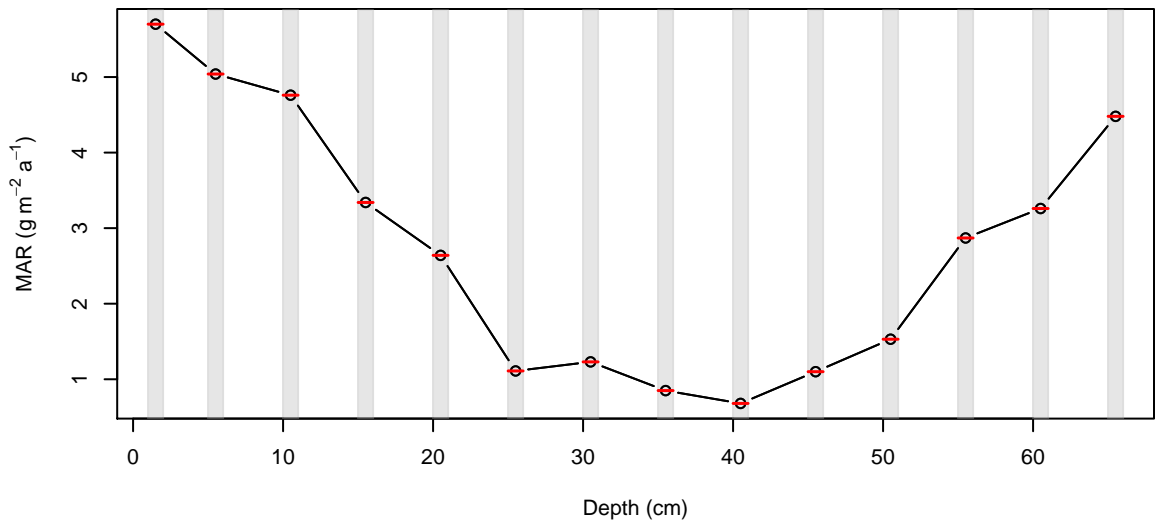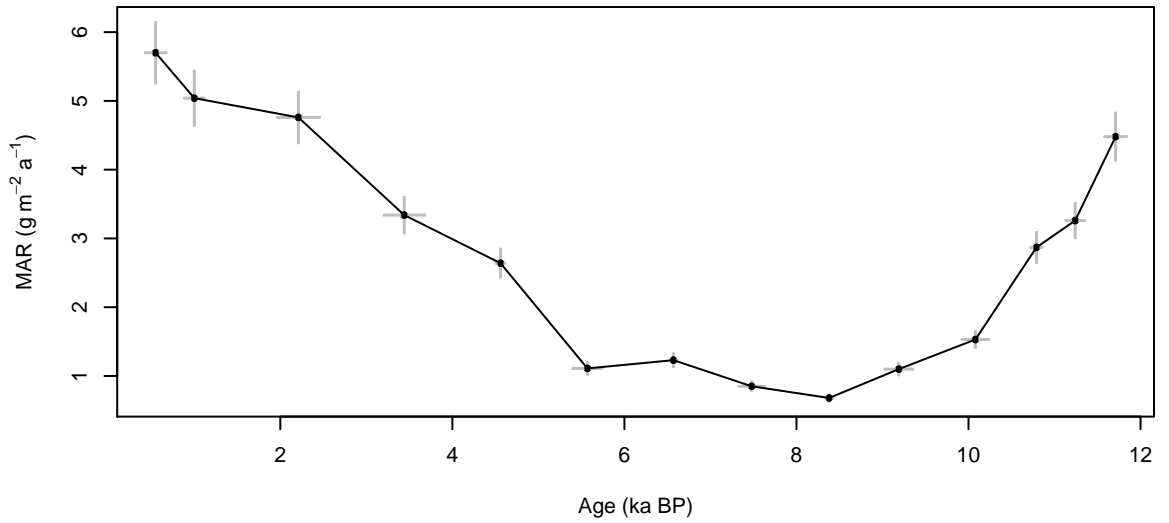

OC437-07-GC49

Reference: McGee et al. 2013

Depth: depths given in paper. Assume they are center, and assume thickness is 1 cm

Age:  $^{14}\text{C}$

Age error: from  $^{14}\text{C}$  error

SBMAR:  $^{230}\text{Th}$

SBMAR err: from  $^{230}\text{Th}$  error

EC: end-member aeolian component of the terrigenous fraction

EC err: assume 15%

Size: Beckman-Coulter LS200 laser diffraction
