# Supplementary material for: Twelve thousand years of dust: the Holocene global dust cycle constrained by natural archives
Source: Copernicus journal article supplement (doi:10.5194/cp-11-869-2015), 2015-06-11
Supplement: Supplementary file 3 [file cp-11-869-2015-supplement.zip]

Beiguoyuan

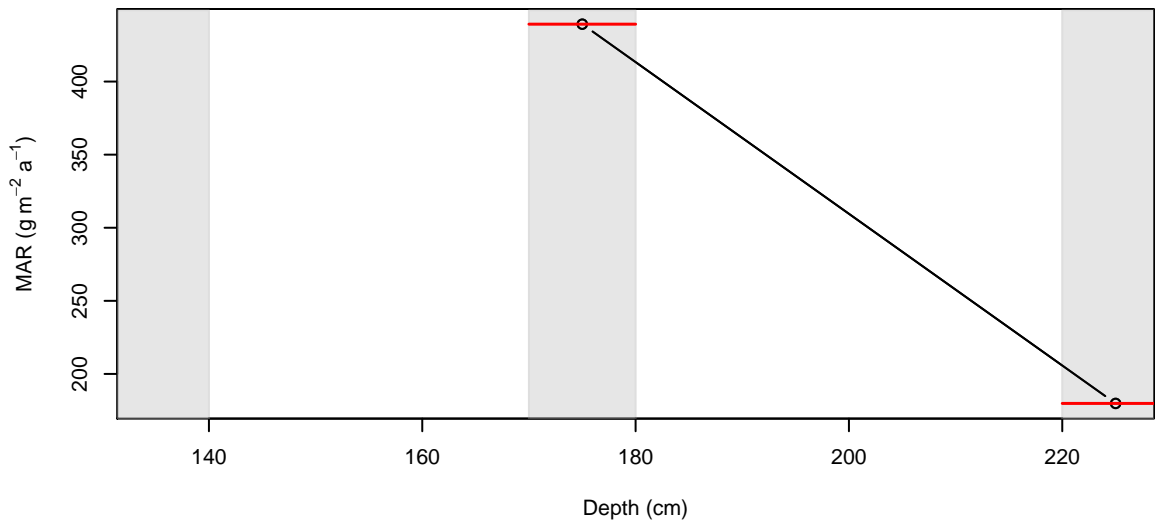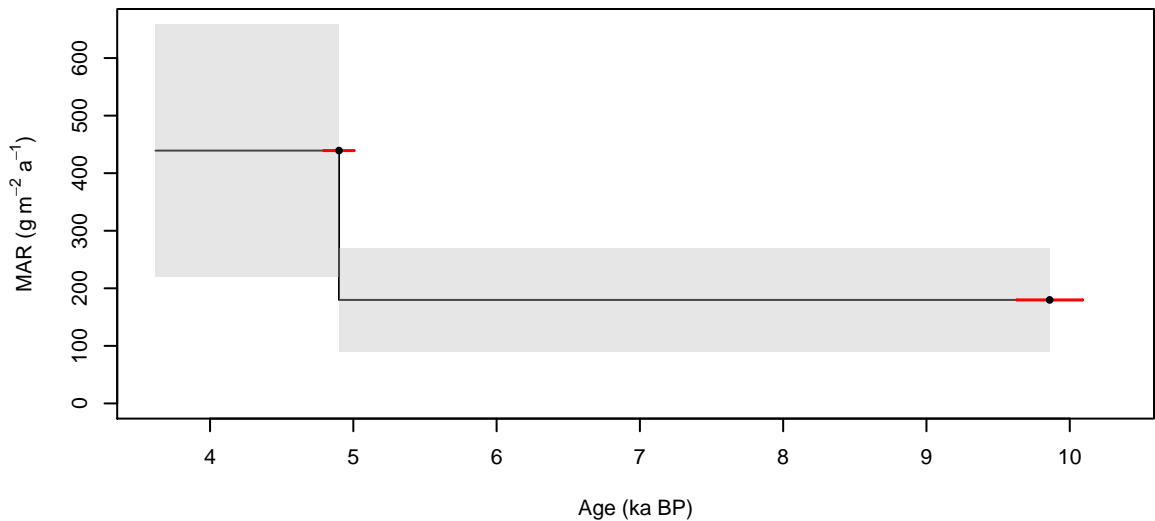

Beiguoyuan  
Reference: Stevens and Lu, 2009  
Depth: Assume 10cm sample thickness  
Age: OSL ages. Age at soil horizon limits.  
Age error: From OSL  
SBMAR: LSR\*DBD, with LSR for each soil horizon  
SBMAR err: From LSR and DBD  
DBD: Assume 1.48  $\text{g/cm}^3$  (Kohfeld and Harrison, 2003)  
DBD err: Assume 15% (Kohfeld and Harrison, 2003)  
EC: Assume it is 1, organic content negligible (Derbyshire, 1982)  
Size: Cilas 920 laser granulometer
