# Supplementary material for: Twelve thousand years of dust: the Holocene global dust cycle constrained by natural archives
Source: Copernicus journal article supplement (doi:10.5194/cp-11-869-2015), 2015-06-11
Supplement: Supplementary file 4 [file cp-11-869-2015-supplement.zip]

Sample 10

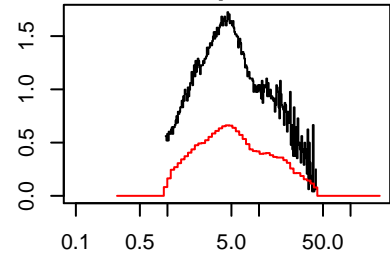

Sample 10 cumulative

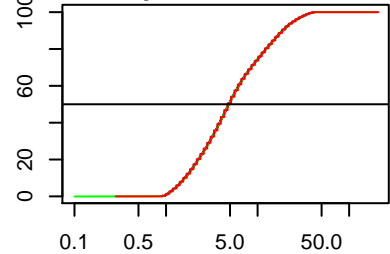

Sample statistics  
Mass conserved = 1  
Median(obs/new) = 4.84 / 4.91  
1%(obs/new) = 1.02 / 1.04  
5%(obs/new) = 1.29 / 1.24  
25%(obs/new) = 2.62 / 2.7  
75%(obs/new) = 10.21 / 10.61  
95%(obs/new) = 24.69 / 24.92  
99%(obs/new) = 35.54 / 35.05

5/25/50/75/95 percentiles

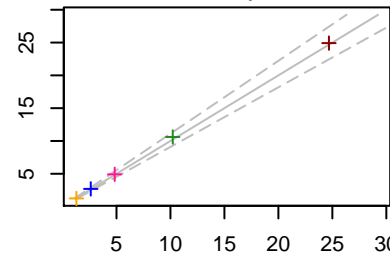

E26.1\_10 percentiles

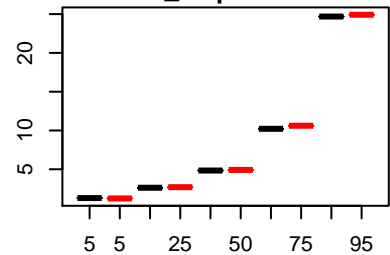

Site statistics  
Percentiles Pearson's corr. = NA  
Mean normalized bias = 0.01
