# Supplementary material for: Twelve thousand years of dust: the Holocene global dust cycle constrained by natural archives
Source: Copernicus journal article supplement (doi:10.5194/cp-11-869-2015), 2015-06-11
Supplement: Supplementary file 6 [file cp-11-869-2015-supplement.zip]

Sample 2.5

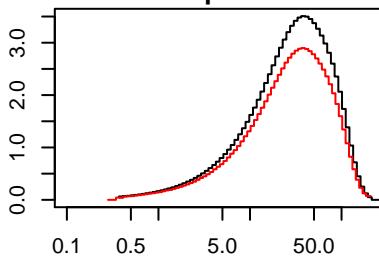

Sample 2.5 cumulative

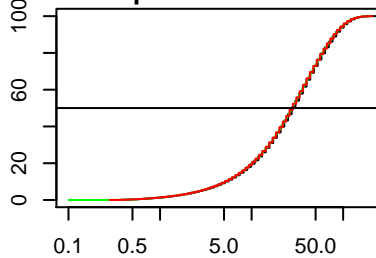

Sample statistics  
 Mass conserved = 1  
 Median(obs/new) = 28.06 / 27.14  
 1%(obs/new) = 0.81 / 0.8  
 5%(obs/new) = 2.73 / 2.7  
 25%(obs/new) = 13.3 / 12.59  
 75%(obs/new) = 53.91 / 53.7  
 95%(obs/new) = 103.56 / 97.56  
 99%(obs/new) = 136.97 / 137.21

Sample 7.5

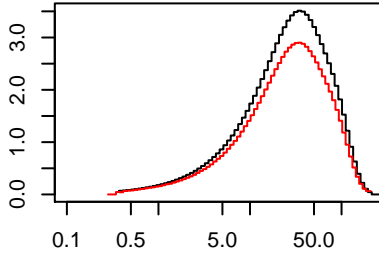

Sample 7.5 cumulative

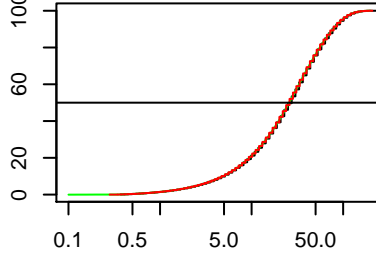

Sample statistics  
 Mass conserved = 1  
 Median(obs/new) = 25.56 / 24.92  
 1%(obs/new) = 0.81 / 0.8  
 5%(obs/new) = 2.49 / 2.7  
 25%(obs/new) = 12.12 / 11.56  
 75%(obs/new) = 49.11 / 49.31  
 95%(obs/new) = 94.34 / 97.56  
 99%(obs/new) = 136.97 / 137.21

Sample 12.5

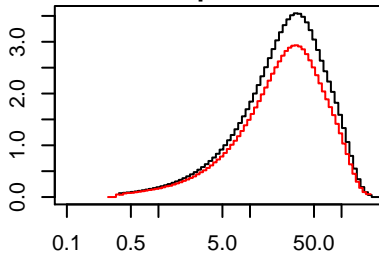

Sample 12.5 cumulative

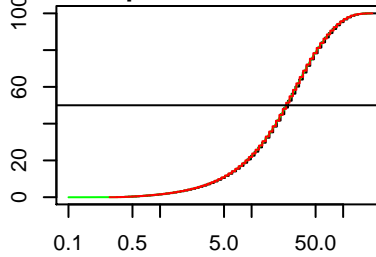

Sample statistics  
 Mass conserved = 1  
 Median(obs/new) = 23.29 / 24.92  
 1%(obs/new) = 0.74 / 0.8  
 5%(obs/new) = 2.49 / 2.47  
 25%(obs/new) = 11.04 / 11.56  
 75%(obs/new) = 44.74 / 45.28  
 95%(obs/new) = 94.34 / 97.56  
 99%(obs/new) = 136.97 / 137.21

Sample 17.5

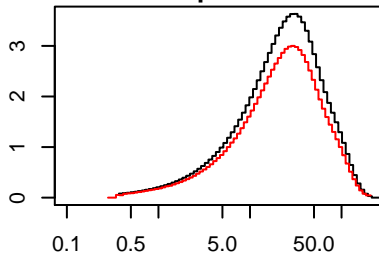

Sample 17.5 cumulative

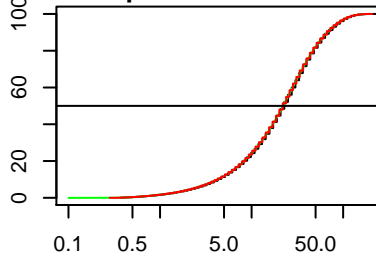

Sample statistics  
 Mass conserved = 1  
 Median(obs/new) = 21.21 / 22.88  
 1%(obs/new) = 0.74 / 0.73  
 5%(obs/new) = 2.26 / 2.27  
 25%(obs/new) = 10.06 / 10.61  
 75%(obs/new) = 40.75 / 41.58  
 95%(obs/new) = 85.94 / 89.58  
 99%(obs/new) = 124.77 / 126

Sample 22.5

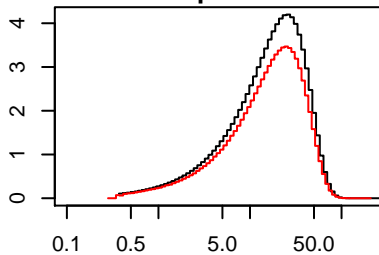

Sample 22.5 cumulative

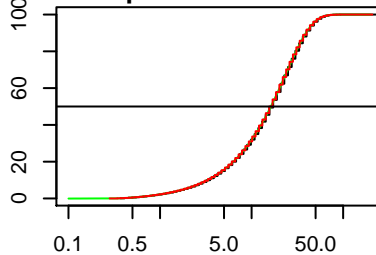

Sample statistics  
 Mass conserved = 1  
 Median(obs/new) = 16.04 / 16.26  
 1%(obs/new) = 0.68 / 0.67  
 5%(obs/new) = 1.88 / 1.75  
 25%(obs/new) = 7.61 / 7.54  
 75%(obs/new) = 28.06 / 27.14  
 95%(obs/new) = 44.74 / 45.28  
 99%(obs/new) = 59.17 / 63.69

Sample 27.5

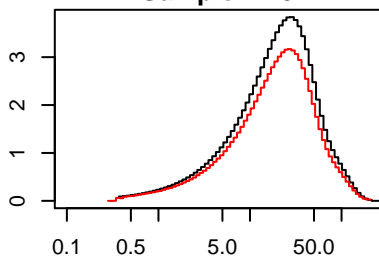

Sample 27.5 cumulative

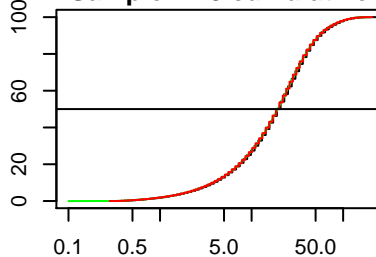

Sample statistics  
 Mass conserved = 1  
 Median(obs/new) = 19.32 / 19.29  
 1%(obs/new) = 0.68 / 0.67  
 5%(obs/new) = 2.06 / 2.08  
 25%(obs/new) = 9.16 / 8.94  
 75%(obs/new) = 33.82 / 35.05  
 95%(obs/new) = 71.31 / 75.53  
 99%(obs/new) = 113.7 / 115.7

Sample 32.5

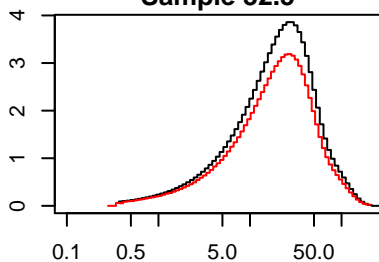

Sample 32.5 cumulative

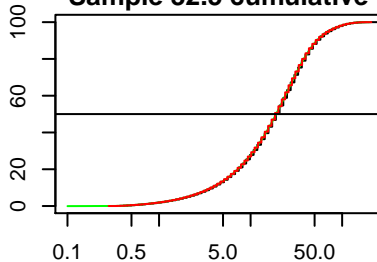

Sample statistics  
 Mass conserved = 1  
 Median(obs/new) = 19.32 / 19.29  
 1%(obs/new) = 0.68 / 0.67  
 5%(obs/new) = 2.06 / 2.08  
 25%(obs/new) = 9.16 / 8.94  
 75%(obs/new) = 33.82 / 35.05  
 95%(obs/new) = 71.31 / 69.36  
 99%(obs/new) = 113.7 / 115.7

Sample 37.5

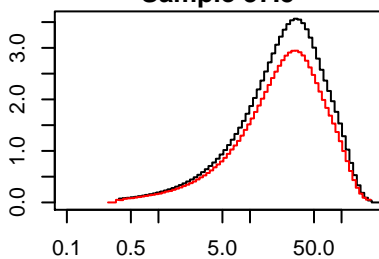

Sample 37.5 cumulative

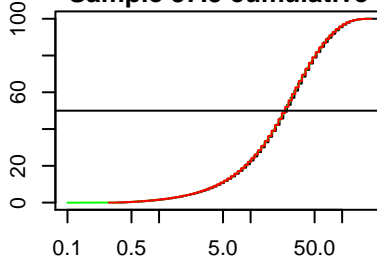

Sample statistics  
 Mass conserved = 1  
 Median(obs/new) = 23.29 / 22.88  
 1%(obs/new) = 0.74 / 0.73  
 5%(obs/new) = 2.49 / 2.47  
 25%(obs/new) = 11.04 / 10.61  
 75%(obs/new) = 44.74 / 45.28  
 95%(obs/new) = 94.34 / 89.58  
 99%(obs/new) = 124.77 / 126

Sample 37.5

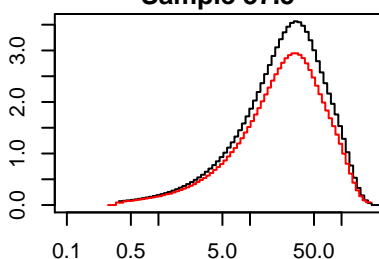

Sample 37.5 cumulative

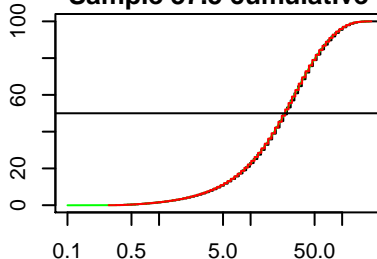

Sample statistics  
 Mass conserved = 1  
 Median(obs/new) = 23.29 / 22.88  
 1%(obs/new) = 0.74 / 0.73  
 5%(obs/new) = 2.49 / 2.47  
 25%(obs/new) = 11.04 / 10.61  
 75%(obs/new) = 44.74 / 45.28  
 95%(obs/new) = 94.34 / 89.58  
 99%(obs/new) = 124.77 / 126

Sample 42.5

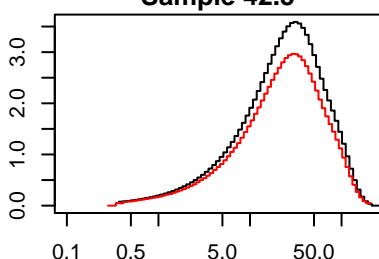

Sample 42.5 cumulative

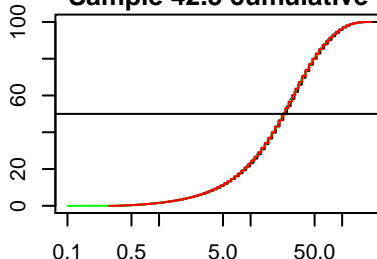

Sample statistics  
 Mass conserved = 1  
 Median(obs/new) = 23.29 / 22.88  
 1%(obs/new) = 0.74 / 0.73  
 5%(obs/new) = 2.49 / 2.47  
 25%(obs/new) = 11.04 / 10.61  
 75%(obs/new) = 44.75 / 41.58  
 95%(obs/new) = 94.34 / 89.58  
 99%(obs/new) = 124.77 / 126

Sample 47.5

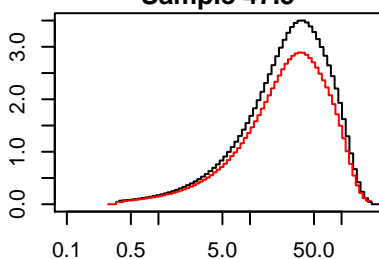

Sample 47.5 cumulative

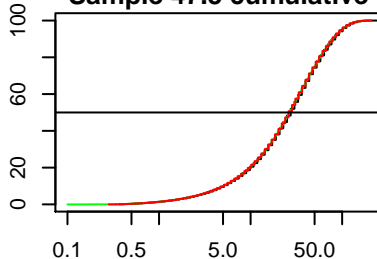

Sample statistics  
 Mass conserved = 1  
 Median(obs/new) = 25.56 / 27.14  
 1%(obs/new) = 0.81 / 0.8  
 5%(obs/new) = 2.73 / 2.7  
 25%(obs/new) = 12.12 / 12.59  
 75%(obs/new) = 49.11 / 49.31  
 95%(obs/new) = 94.34 / 97.56  
 99%(obs/new) = 136.97 / 137.21

Sample 52.5

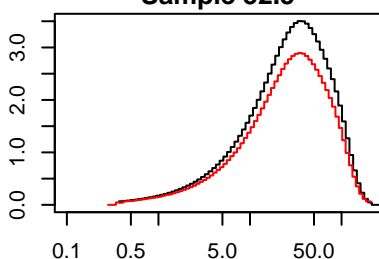

Sample 52.5 cumulative

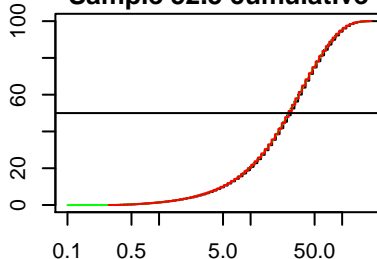

Sample statistics  
 Mass conserved = 1  
 Median(obs/new) = 25.56 / 27.14  
 1%(obs/new) = 0.81 / 0.8  
 5%(obs/new) = 2.73 / 2.7  
 25%(obs/new) = 12.12 / 12.59  
 75%(obs/new) = 49.11 / 49.31  
 95%(obs/new) = 94.34 / 97.56  
 99%(obs/new) = 136.97 / 137.21

Sample 57.5

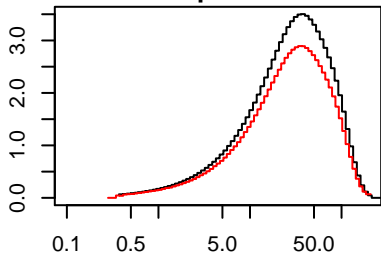

Sample 57.5 cumulative

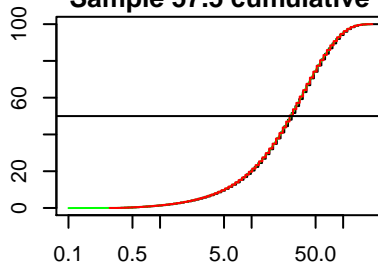

Sample statistics  
Mass conserved = 1  
Median(obs/new) = 28.06 / 27.14  
1%(obs/new) = 0.81 / 0.8  
5%(obs/new) = 2.73 / 2.7  
25%(obs/new) = 12.12 / 12.59  
75%(obs/new) = 49.11 / 49.31  
95%(obs/new) = 103.56 / 97.56  
99%(obs/new) = 136.97 / 137.21

5/25/50/75/95 percentiles

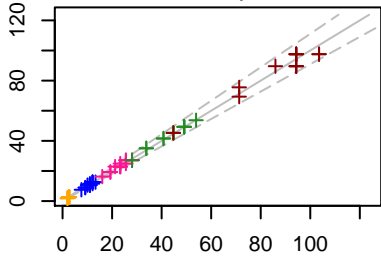

OC437-07-GC37 percentiles

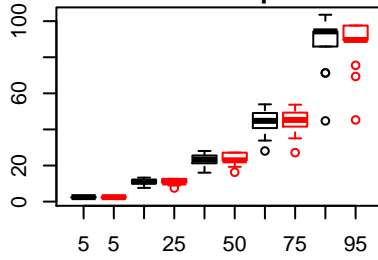

Site statistics  
Percentiles Pearson's corr. = 0.966  
Mean normalized bias = 0
