# Supplementary material for: Twelve thousand years of dust: the Holocene global dust cycle constrained by natural archives
Source: Copernicus journal article supplement (doi:10.5194/cp-11-869-2015), 2015-06-11
Supplement: Supplementary file 11 [file cp-11-869-2015-supplement.zip]

## Xifeng

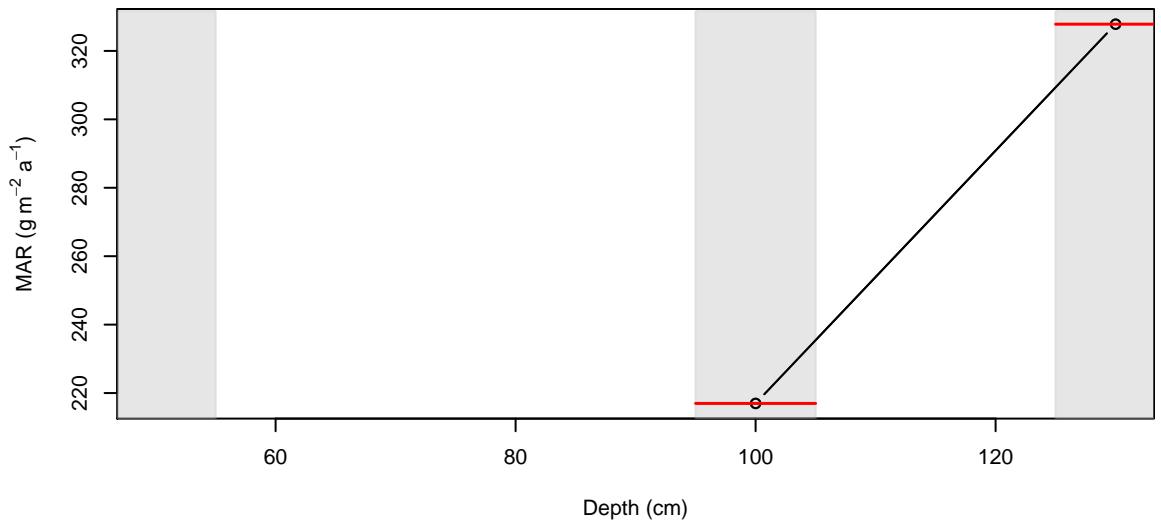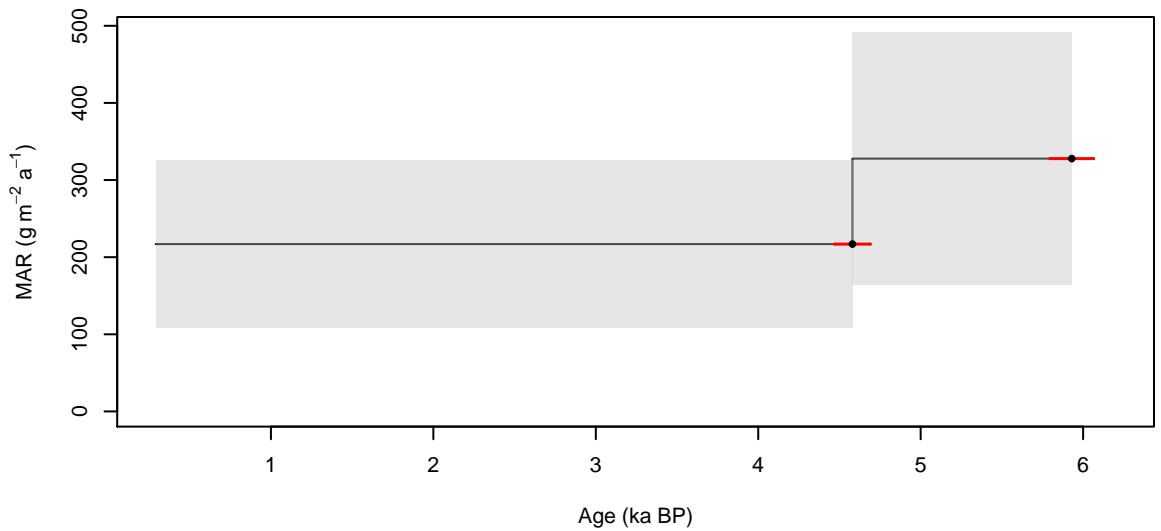

Xifeng

Reference: Stevens and Lu, 2009

Depth: Assume 10cm sample thickness

Age: OSL ages. Age at soil horizon limits.

Age error: From OSL

SBMAR: LSR\*DBD, with LSR for each soil horizon

SBMAR err: From LSR and DBD

DBD: Assume 1.48  $\text{g/cm}^3$  (Kohfeld and Harrison, 2003)

DBD err: Assume 15% (Kohfeld and Harrison, 2003)

EC: Assume it is 1, organic content negligible (Derbyshire, 1982)

Size: Cilas 920 laser granulometer
