# Supplementary material for: Twelve thousand years of dust: the Holocene global dust cycle constrained by natural archives
Source: Copernicus journal article supplement (doi:10.5194/cp-11-869-2015), 2015-06-11
Supplement: Supplementary file 12 [file cp-11-869-2015-supplement.zip]

Sample 10

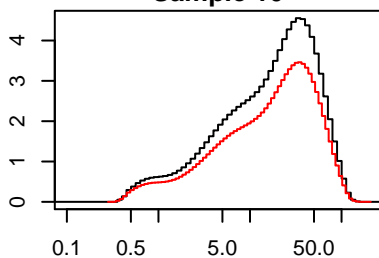

Sample 10 cumulative

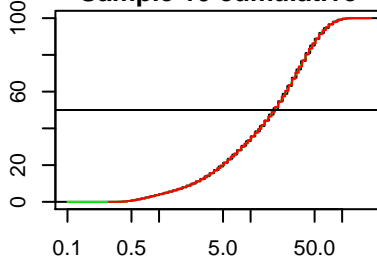

Sample statistics  
 Mass conserved = 1  
 Median(obs/new) = 18.91 / 17.71  
 1%(obs/new) = 0.53 / 0.56  
 5%(obs/new) = 1.19 / 1.24  
 25%(obs/new) = 6.71 / 6.35  
 75%(obs/new) = 37.74 / 35.05  
 95%(obs/new) = 67.1 / 69.36  
 99%(obs/new) = 94.79 / 97.56

Sample 30

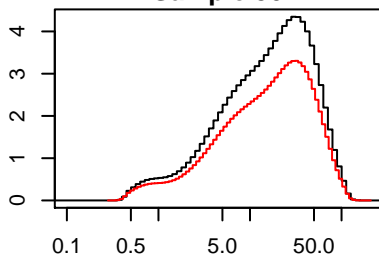

Sample 30 cumulative

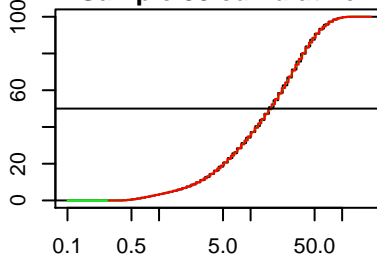

Sample statistics  
 Mass conserved = 1  
 Median(obs/new) = 16.86 / 16.26  
 1%(obs/new) = 0.6 / 0.62  
 5%(obs/new) = 1.5 / 1.47  
 25%(obs/new) = 6.71 / 6.35  
 75%(obs/new) = 33.63 / 32.19  
 95%(obs/new) = 67.1 / 63.69  
 99%(obs/new) = 94.79 / 89.58

Sample 60

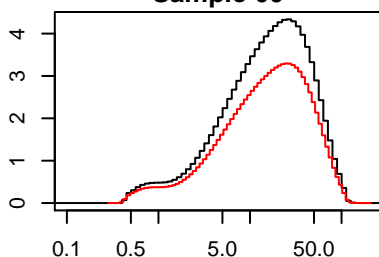

Sample 60 cumulative

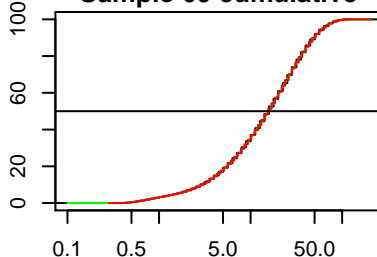

Sample statistics  
 Mass conserved = 1  
 Median(obs/new) = 15.02 / 16.26  
 1%(obs/new) = 0.6 / 0.62  
 5%(obs/new) = 1.5 / 1.61  
 25%(obs/new) = 6.71 / 6.92  
 75%(obs/new) = 29.97 / 32.19  
 95%(obs/new) = 59.81 / 63.69  
 99%(obs/new) = 84.48 / 89.58

Sample 90

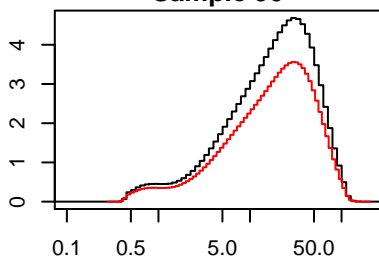

Sample 90 cumulative

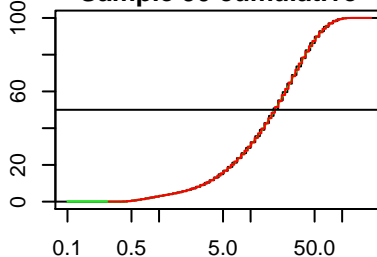

Sample statistics  
 Mass conserved = 1  
 Median(obs/new) = 18.91 / 19.29  
 1%(obs/new) = 0.6 / 0.62  
 5%(obs/new) = 1.69 / 1.61  
 25%(obs/new) = 7.53 / 8.21  
 75%(obs/new) = 33.63 / 35.05  
 95%(obs/new) = 67.1 / 69.36  
 99%(obs/new) = 94.79 / 89.58

5/25/50/75/95 percentiles

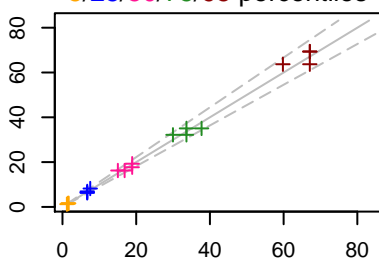

Jingyuan percentiles

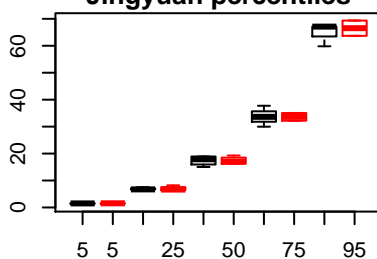

Site statistics  
 Percentiles Pearson's corr. = 0.577  
 Mean normalized bias = 0.01
