# Supplementary material for: Twelve thousand years of dust: the Holocene global dust cycle constrained by natural archives
Source: Copernicus journal article supplement (doi:10.5194/cp-11-869-2015), 2015-06-11
Supplement: Supplementary file 13 [file cp-11-869-2015-supplement.zip]

## E26.1

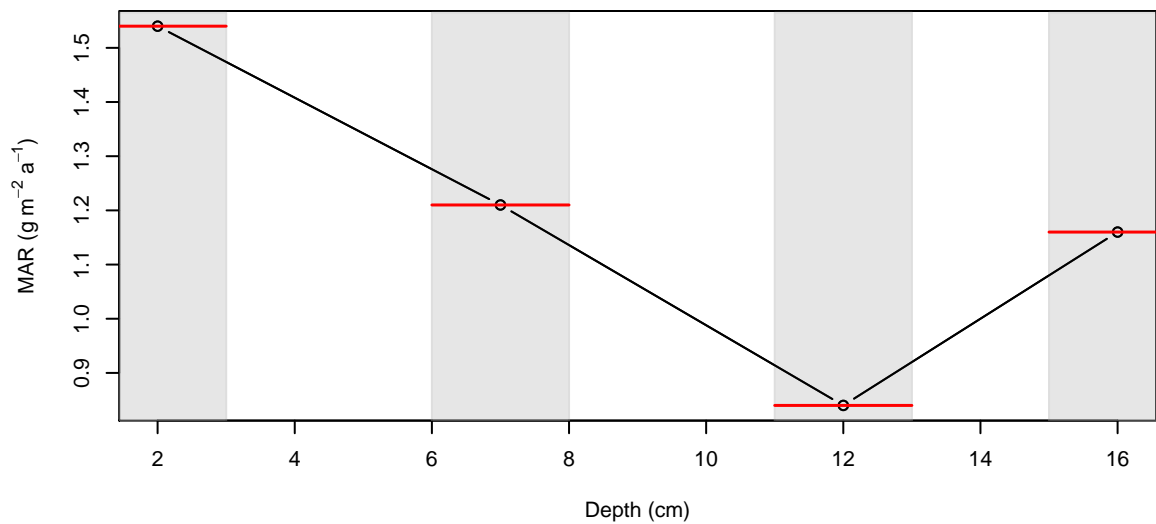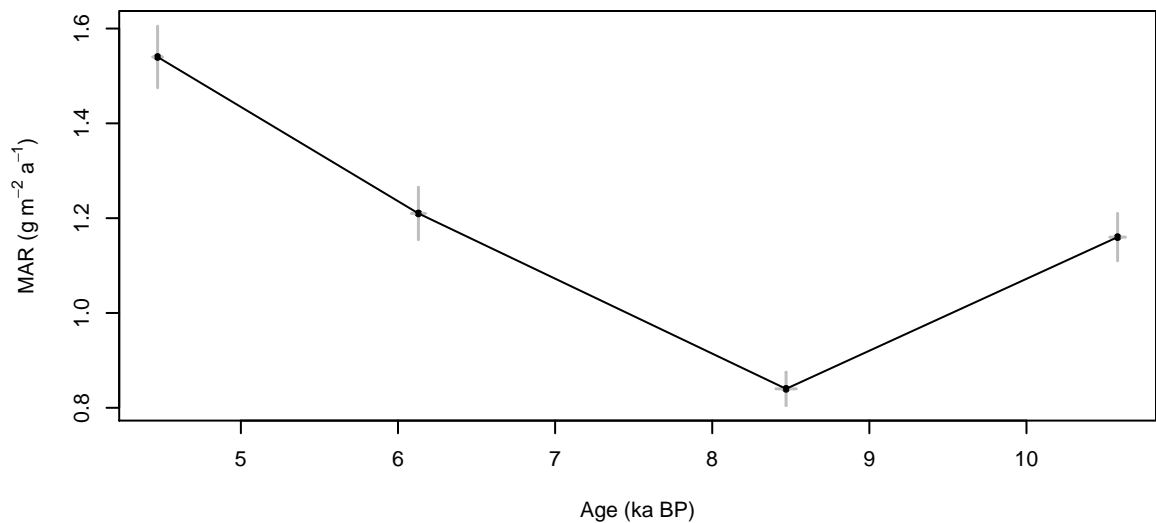

E26.1

Reference: Hesse, 1994; Fitzsimmons et al., 2013

Depth: Depth intervals given in paper

Age: Age is top, approximating to center. Assuming sample thickness is 2 cm.

AMS 14C on planktonic foraminifera *G. menardii*, calibrated with IntCal09.

Age error: From calibrated 14C ages

SBMAR: based on 3rd order regression model

SBMAR err: Assume from age error, 5% from terrigenous fraction. Assume DBD uncertainty 5%.

EC: ash-corrected terrigenous fraction - operational definition

EC err: Assume 5%

Size: Coulter Counter
