# Supplementary material for: Twelve thousand years of dust: the Holocene global dust cycle constrained by natural archives
Source: Copernicus journal article supplement (doi:10.5194/cp-11-869-2015), 2015-06-11
Supplement: Supplementary file 15 [file cp-11-869-2015-supplement.zip]

# EN06601-0021PG

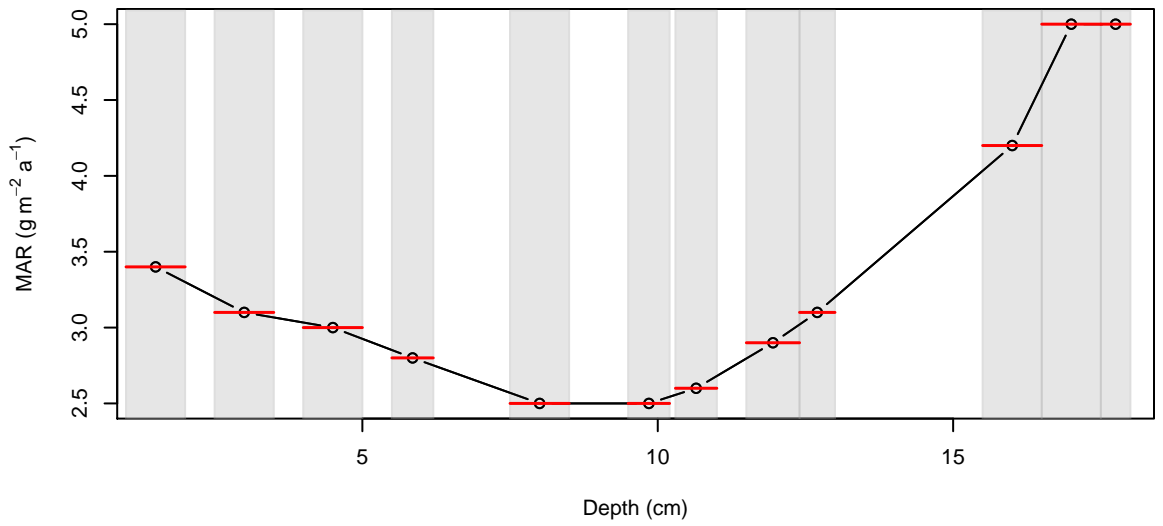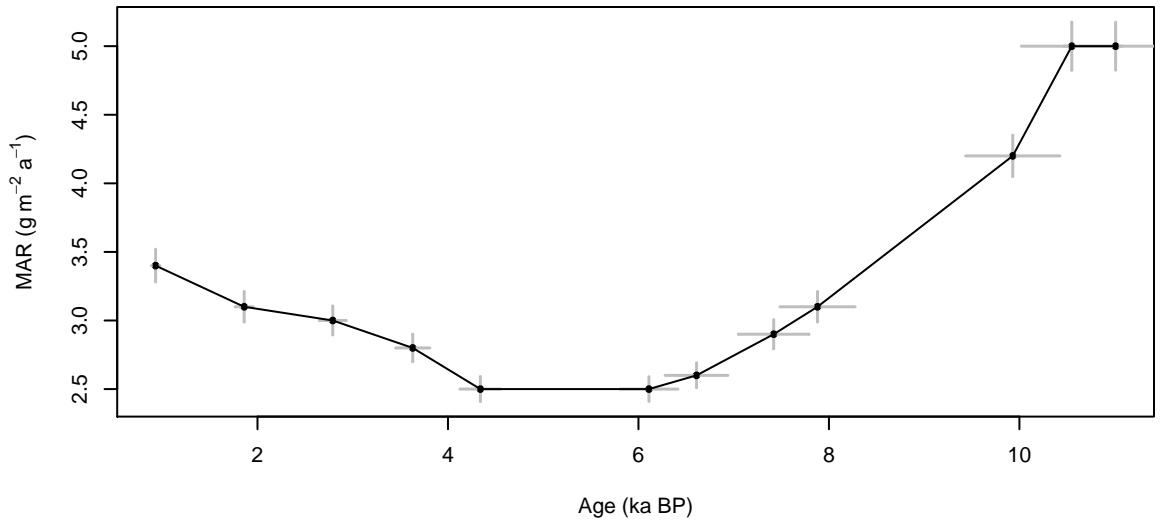

EN06601-0021PG  
 Reference: Francois et al. 1990  
 Depth: depth intervals given in paper  
 Age: based on d180 profile  
 Age error: assume 6.8%  
 SBMAR: 230Th  
 SBMAR err: assume 5%  
 EC: based on the terrigenous fraction: non-carbonate flux  
 EC err: assume 5%
