# Supplementary material for: Twelve thousand years of dust: the Holocene global dust cycle constrained by natural archives
Source: Copernicus journal article supplement (doi:10.5194/cp-11-869-2015), 2015-06-11
Supplement: Supplementary file 17 [file cp-11-869-2015-supplement.zip]

Sample 103-106

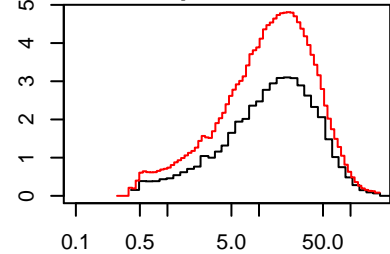

Sample 103-106 cumulative

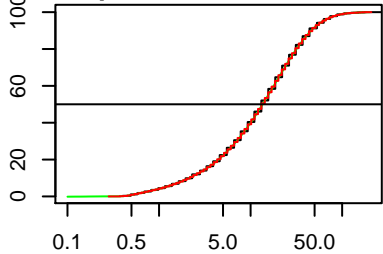

Sample statistics  
Mass conserved = 0.998  
Median(obs/new) = 14.35 / 13.71  
1%(obs/new) = 0.53 / 0.52  
5%(obs/new) = 1.07 / 1.14  
25%(obs/new) = 6.05 / 5.83  
75%(obs/new) = 28.75 / 27.14  
95%(obs/new) = 58 / 63.69  
99%(obs/new) = 96.5 / 106.24

Sample 250-254

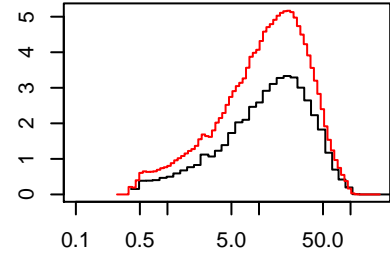

Sample 250-254 cumulative

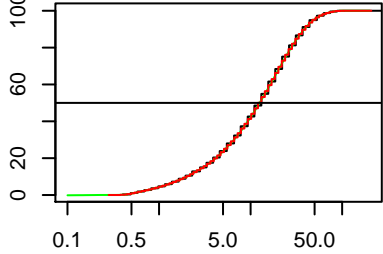

Sample statistics  
Mass conserved = 1  
Median(obs/new) = 12.05 / 12.59  
1%(obs/new) = 0.53 / 0.52  
5%(obs/new) = 1.07 / 1.14  
25%(obs/new) = 5.05 / 5.35  
75%(obs/new) = 24.2 / 24.92  
95%(obs/new) = 48.5 / 49.31  
99%(obs/new) = 68.5 / 69.36

Sample 355-358

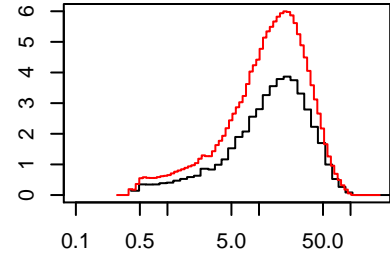

Sample 355-358 cumulative

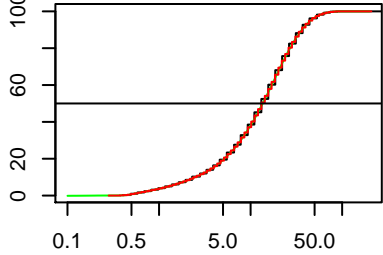

Sample statistics  
Mass conserved = 1  
Median(obs/new) = 14.35 / 13.71  
1%(obs/new) = 0.53 / 0.52  
5%(obs/new) = 1.27 / 1.24  
25%(obs/new) = 6.05 / 6.35  
75%(obs/new) = 24.2 / 22.88  
95%(obs/new) = 48.5 / 45.28  
99%(obs/new) = 68.5 / 63.69

Sample 511-516

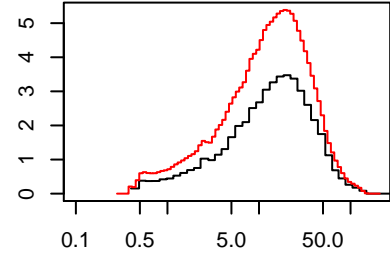

Sample 511-516 cumulative

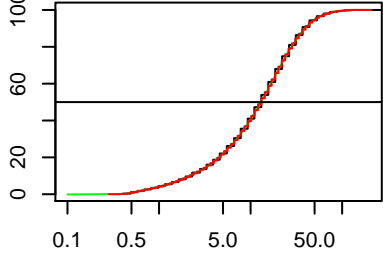

Sample statistics  
Mass conserved = 1  
Median(obs/new) = 12.05 / 12.59  
1%(obs/new) = 0.53 / 0.52  
5%(obs/new) = 1.27 / 1.24  
25%(obs/new) = 6.05 / 5.83  
75%(obs/new) = 24.2 / 24.92  
95%(obs/new) = 48.5 / 49.31  
99%(obs/new) = 81 / 82.26

5/25/50/75/95 percentiles

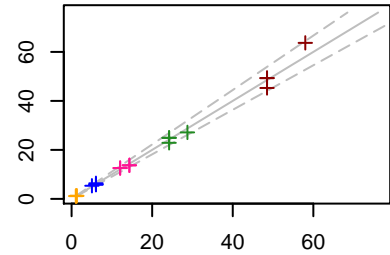

Zagoskin percentiles

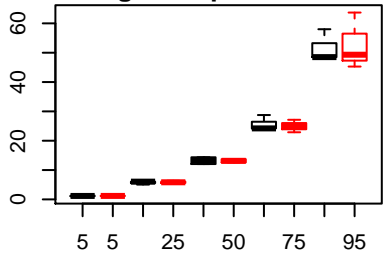

Site statistics  
Percentiles Pearson's corr. = 0.972  
Mean normalized bias = 0.01
