# Supplementary material for: Twelve thousand years of dust: the Holocene global dust cycle constrained by natural archives
Source: Copernicus journal article supplement (doi:10.5194/cp-11-869-2015), 2015-06-11
Supplement: Supplementary file 19 [file cp-11-869-2015-supplement.zip]

138-850A-1H-1

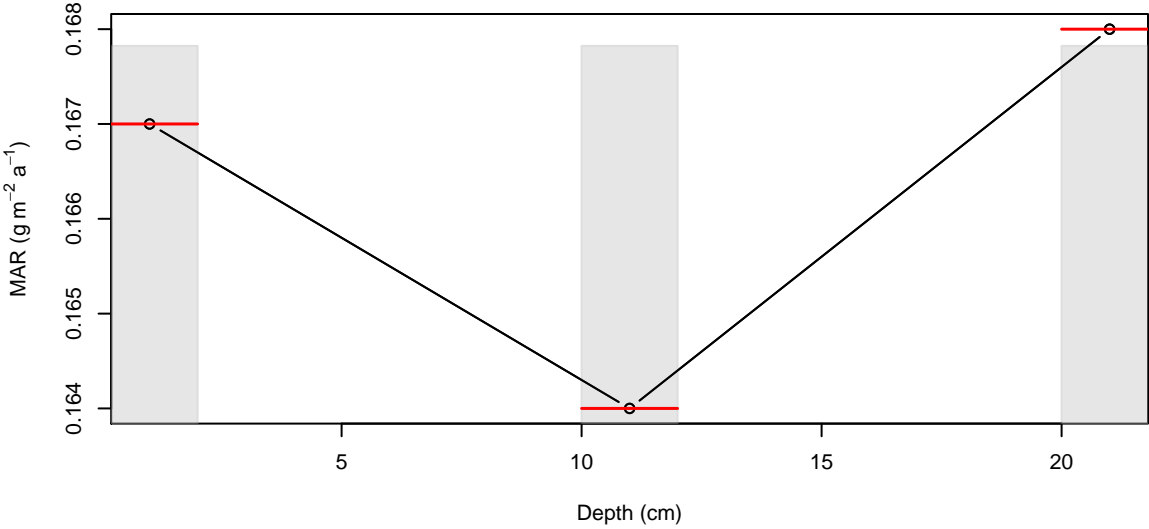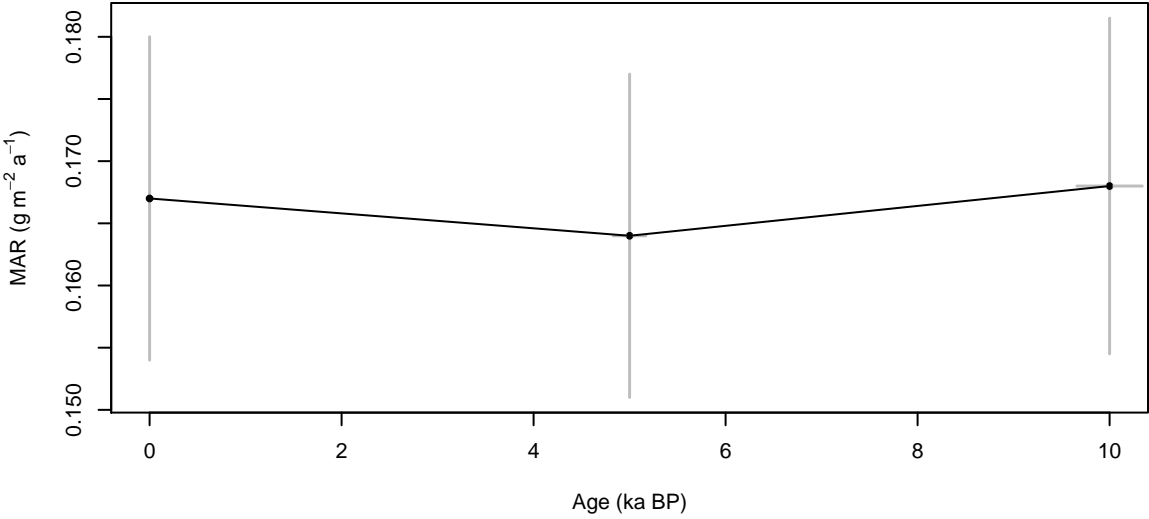

138-850A-1H-1  
Reference: McGee et al. 2007  
Depth: given in paper.  
Age: from  $\text{d}_{18\text{O}}$ . Age reported as TOP, approximating to center.  
Age error: assuming 6.8%  
SBMAR:  $^{230}\text{Th}$   
SBMAR error: assuming 5%  
EC: based on  $^{232}\text{Th}$ , assuming 10.7 ppm in dust  
EC err: assume 15%, including analytical + proxy uncertainty  $1/10.7$ , McGee et al. 2007
