# Supplementary material for: Twelve thousand years of dust: the Holocene global dust cycle constrained by natural archives
Source: Copernicus journal article supplement (doi:10.5194/cp-11-869-2015), 2015-06-11
Supplement: Supplementary file 21 [file cp-11-869-2015-supplement.zip]

Sample 175

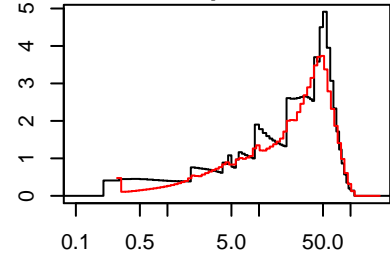

Sample 175 cumulative

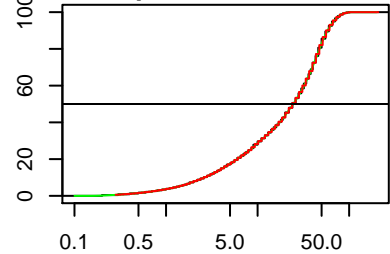

Sample statistics  
Mass conserved = 0.998  
Median(obs/new) = 25 / 24.92  
1%(obs/new) = 0.35 / 0.39  
5%(obs/new) = 1.35 / 1.35  
25%(obs/new) = 8.25 / 8.21  
75%(obs/new) = 44.5 / 45.28  
95%(obs/new) = 67.5 / 69.36  
99%(obs/new) = 82.5 / 82.26

Sample 225

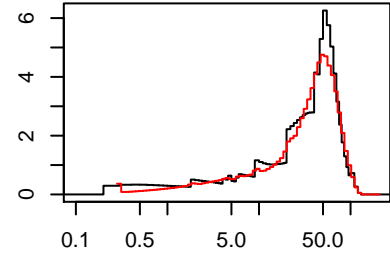

Sample 225 cumulative

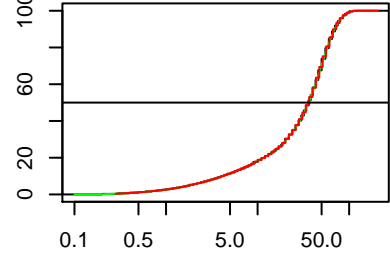

Sample statistics  
Mass conserved = 0.999  
Median(obs/new) = 37 / 35.05  
1%(obs/new) = 0.45 / 0.47  
5%(obs/new) = 1.9 / 1.75  
25%(obs/new) = 16.5 / 16.26  
75%(obs/new) = 52.5 / 53.7  
95%(obs/new) = 77.5 / 82.26  
99%(obs/new) = 97.5 / 97.56

5/25/50/75/95 percentiles

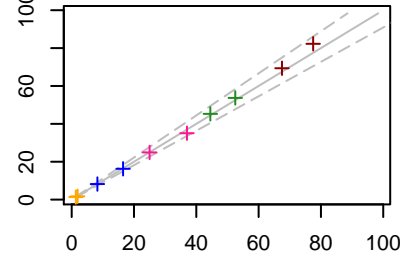

Beiguoyuan percentiles

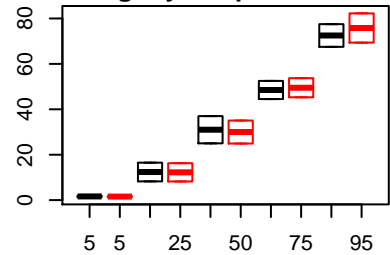

Site statistics  
Percentiles Pearson's corr. = 1  
Mean normalized bias = 0
