# Supplementary material for: Twelve thousand years of dust: the Holocene global dust cycle constrained by natural archives
Source: Copernicus journal article supplement (doi:10.5194/cp-11-869-2015), 2015-06-11
Supplement: Supplementary file 23 [file cp-11-869-2015-supplement.zip]

## Luochuan

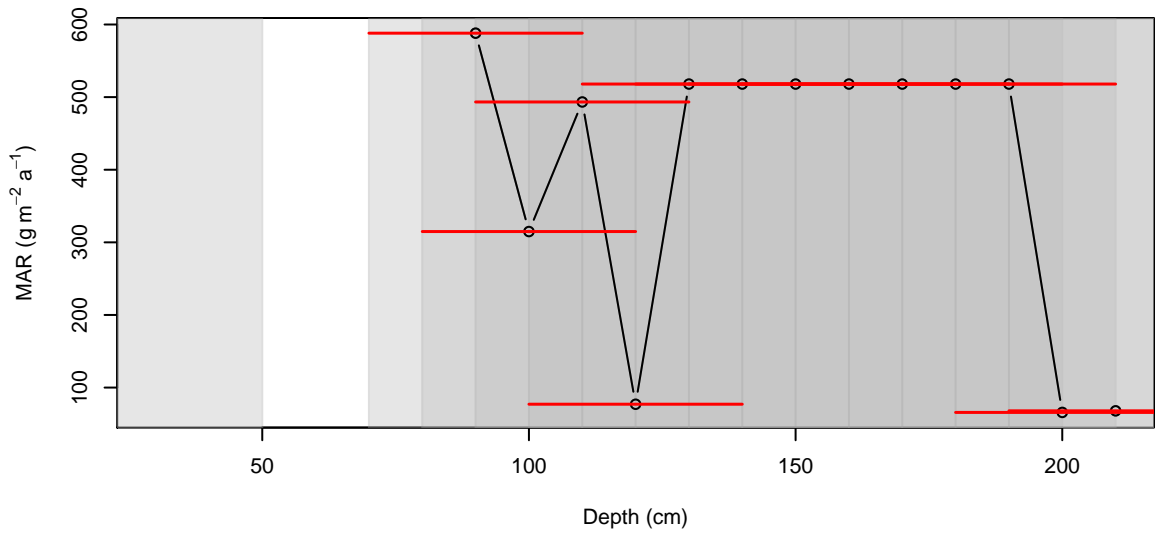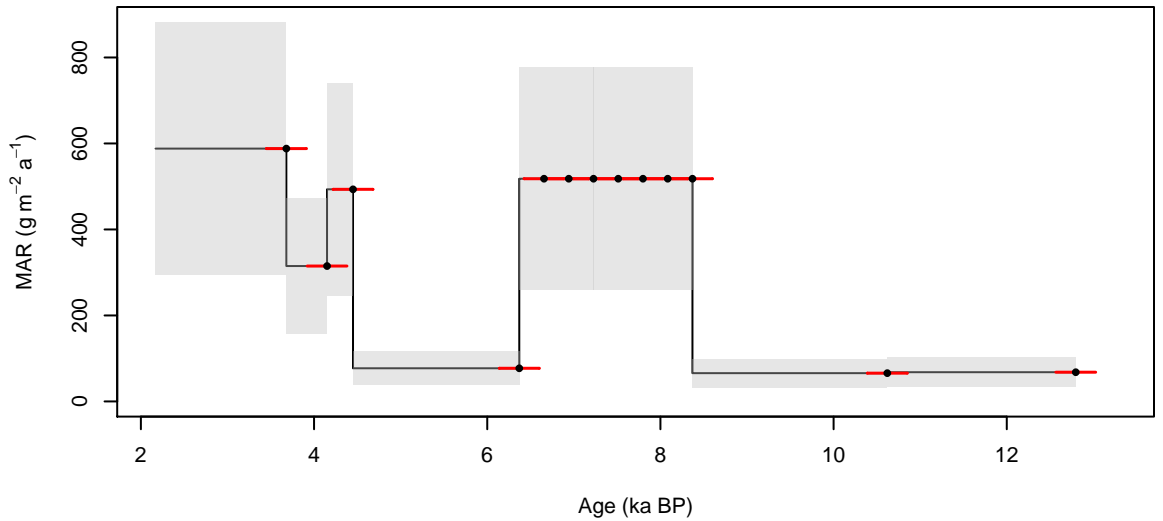

Luochuan  
 Reference: Lu et al., 2013  
 Depth: Assume 10cm sample thickness  
 Age: OSL ages. Does not include the last ~2 ka (agricultural disturbance)  
 Age error: From OSL  
 SBMAR: LSR\*DBD, with LSR for each soil horizon  
 SBMAR err: From LSR and DBD  
 DBD: Assume 1.48 g/cm<sup>3</sup> (Kohfeld and Harrison, 2003)  
 DBD err: Assume 15% (Kohfeld and Harrison, 2003)  
 EC: Assume it is 1, organic content negligible (Derbyshire, 1982)  
 Size: Cilas 920 laser granulometer
