# Supplementary material for: Twelve thousand years of dust: the Holocene global dust cycle constrained by natural archives
Source: Copernicus journal article supplement (doi:10.5194/cp-11-869-2015), 2015-06-11
Supplement: Supplementary file 24 [file cp-11-869-2015-supplement.zip]

# PS2498-1

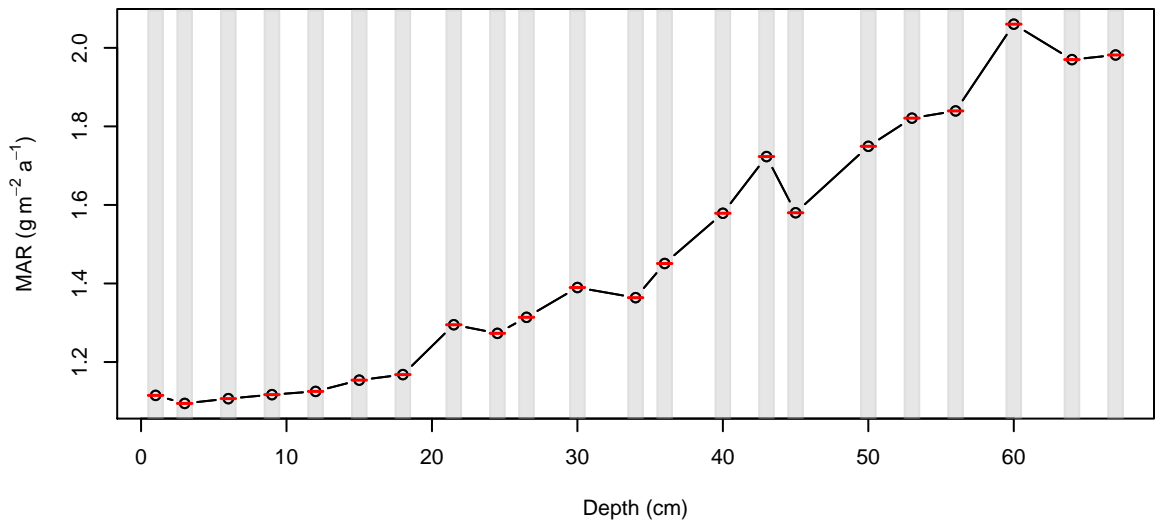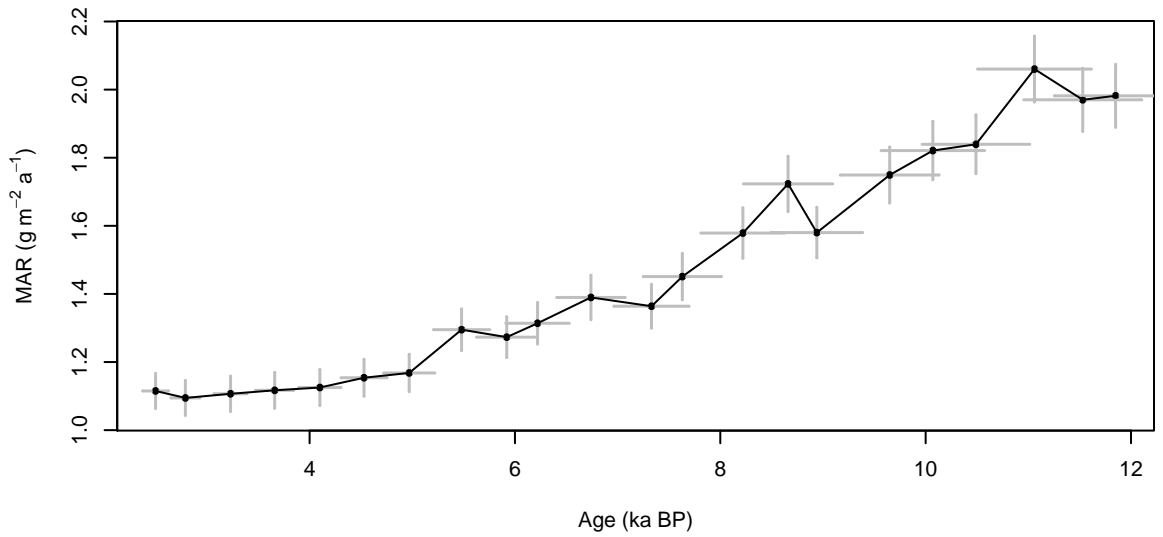

PS2498-1

Reference: Anderson et al. 2014

Depth: Depth intervals given in paper

Age: Assuming age is center, and sample thickness is 1 cm. Age is  $^{14}\text{C}+\text{d18O}$  correlation with EDC

Age error: assuming 10%

SBMAR:  $^{230}\text{Th}$

SBMAR err: xs-Th error

EC:  $^{232}\text{Th}$ -based dust concentration (10 ppm  $^{23}\text{Th}$  in dust;  $1/0.242530074 \text{ dpm} \rightarrow \text{ppm}$ )
