# Supplementary material for: Twelve thousand years of dust: the Holocene global dust cycle constrained by natural archives
Source: Copernicus journal article supplement (doi:10.5194/cp-11-869-2015), 2015-06-11
Supplement: Supplementary file 25 [file cp-11-869-2015-supplement.zip]

# TT013-MC19

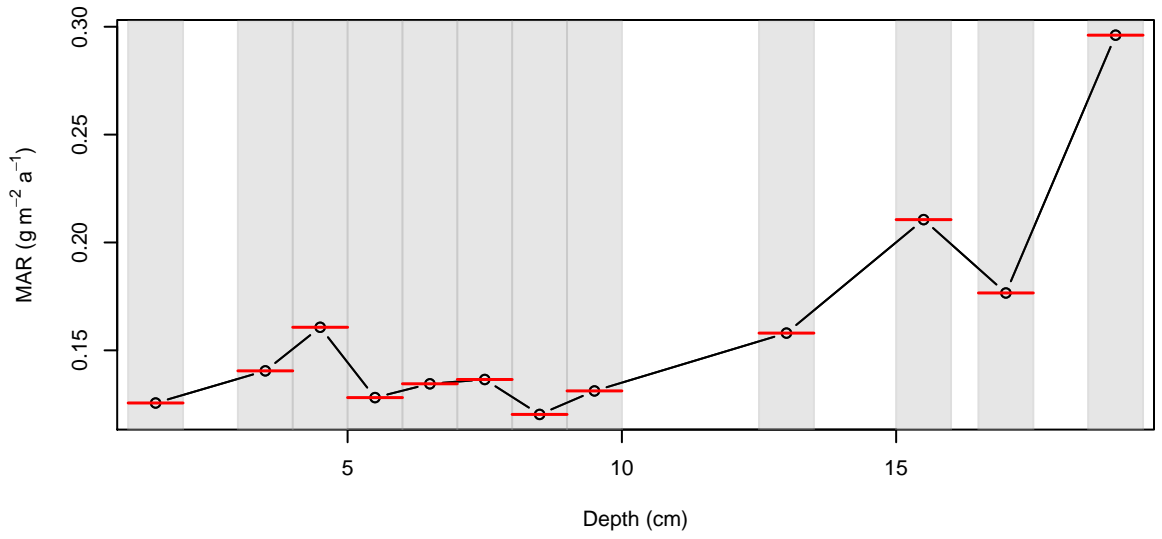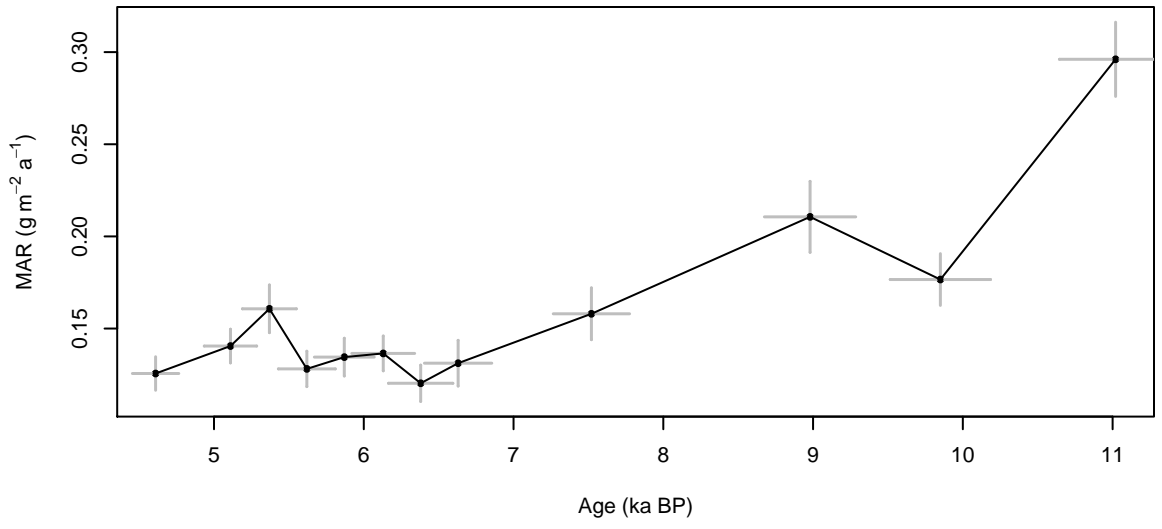

TT013-MC19  
Reference: Anderson et al. 2006  
Fluxes of lithogenic material (dust) were calculated based on the <sup>230</sup>Th-normalized accumulation rate of <sup>232</sup>Th, assuming a <sup>232</sup>Th content of 10 ppm in dust  
Age model combines <sup>14</sup>C and oxygen stratigraph. Age model (<sup>14</sup>C part) uncertainties are reported in Anderson et al. 2007 (Marine Chem.). Full age models in Murray et al. 2000 (PO)  
Depth Depth intervals given in paper  
Age: Assuming age is center. Age is d180  
SBMAR: <sup>230</sup>Th  
SBMAR err: Assume 5%  
EC: <sup>232</sup>Th-based dust concentration (10 ppm <sup>23</sup>Th in dust; 1/0.242530074 dpm -> ppm)  
EC: err
