# Supplementary material for: Twelve thousand years of dust: the Holocene global dust cycle constrained by natural archives
Source: Copernicus journal article supplement (doi:10.5194/cp-11-869-2015), 2015-06-11
Supplement: Supplementary file 28 [file cp-11-869-2015-supplement.zip]

Sample 0–63cm

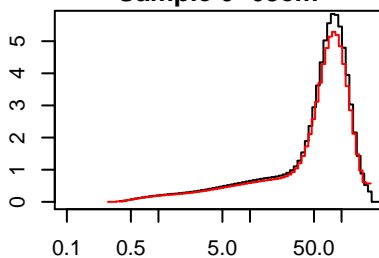

Sample 0–63cm cumulative

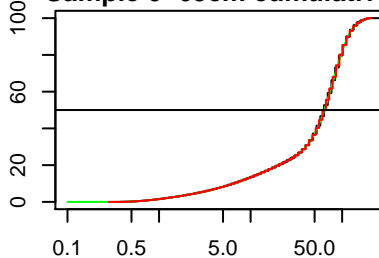

Sample statistics  
 Mass conserved = 0.978  
 Median(obs/new) = 66.52 / 63.69  
 1%(obs/new) = 0.83 / 0.8  
 5%(obs/new) = 2.79 / 2.7  
 25%(obs/new) = 31.54 / 32.19  
 75%(obs/new) = 88 / 89.58  
 95%(obs/new) = 140.25 / 137.21  
 99%(obs/new) = 169 / 177.21

Sample 63–140cm

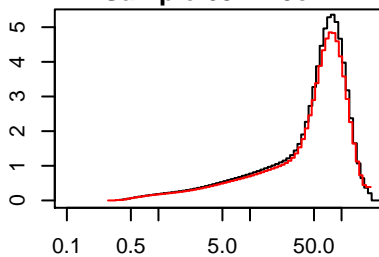

Sample 63–140cm cumulative

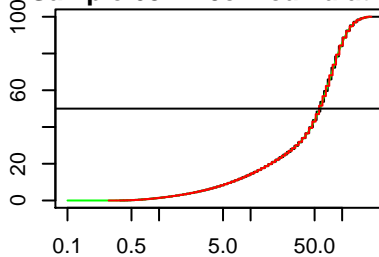

Sample statistics  
 Mass conserved = 0.989  
 Median(obs/new) = 55.2 / 58.48  
 1%(obs/new) = 0.83 / 0.87  
 5%(obs/new) = 2.79 / 2.7  
 25%(obs/new) = 23.84 / 22.88  
 75%(obs/new) = 80.17 / 82.26  
 95%(obs/new) = 127.75 / 126  
 99%(obs/new) = 169 / 162.73

Sample 140–250cm

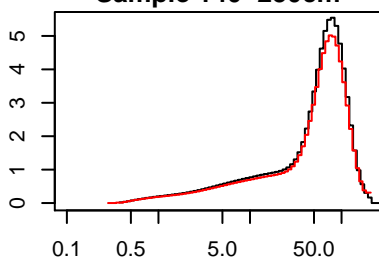

Sample 140–250cm cumulative

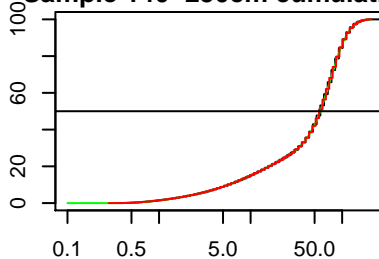

Sample statistics  
 Mass conserved = 0.991  
 Median(obs/new) = 55.2 / 58.48  
 1%(obs/new) = 0.83 / 0.8  
 5%(obs/new) = 2.54 / 2.7  
 25%(obs/new) = 23.84 / 24.92  
 75%(obs/new) = 80.17 / 82.26  
 95%(obs/new) = 127.75 / 126  
 99%(obs/new) = 154 / 162.73

Sample 250–340cm

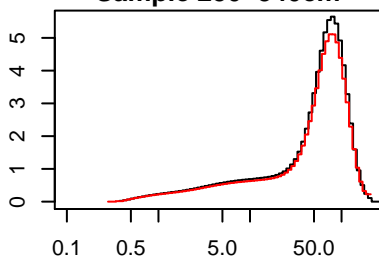

Sample 250–340cm cumulative

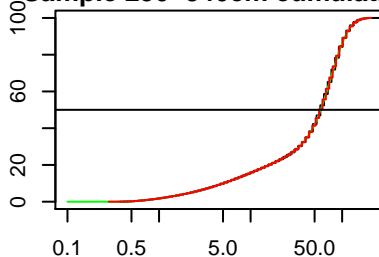

Sample statistics  
 Mass conserved = 0.993  
 Median(obs/new) = 60.59 / 58.48  
 1%(obs/new) = 0.76 / 0.73  
 5%(obs/new) = 2.31 / 2.27  
 25%(obs/new) = 26.16 / 24.92  
 75%(obs/new) = 80.17 / 82.26  
 95%(obs/new) = 127.75 / 126  
 99%(obs/new) = 154 / 162.73

Sample 340–590cm

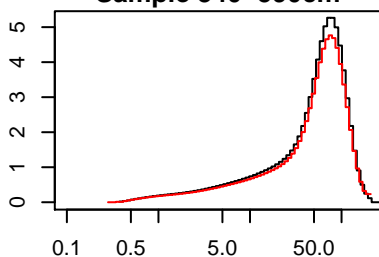

Sample 340–590cm cumulative

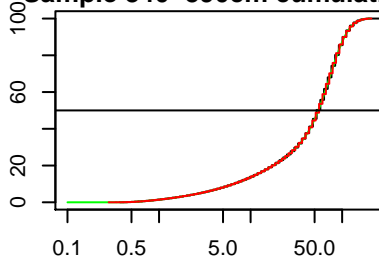

Sample statistics  
 Mass conserved = 0.996  
 Median(obs/new) = 55.2 / 53.7  
 1%(obs/new) = 0.83 / 0.8  
 5%(obs/new) = 2.79 / 2.94  
 25%(obs/new) = 23.84 / 24.92  
 75%(obs/new) = 80.17 / 82.26  
 95%(obs/new) = 127.75 / 126  
 99%(obs/new) = 154 / 162.73

5/25/50/75/95 percentiles

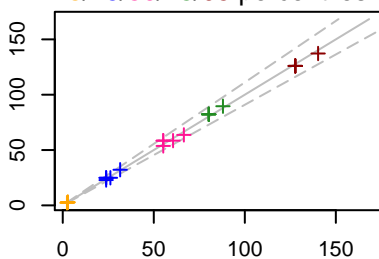

OWR percentiles

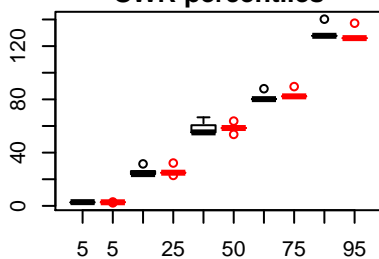

Site statistics  
 Percentiles Pearson's corr. = 1  
 Mean normalized bias = 0
