# Supplementary material for: Twelve thousand years of dust: the Holocene global dust cycle constrained by natural archives
Source: Copernicus journal article supplement (doi:10.5194/cp-11-869-2015), 2015-06-11
Supplement: Supplementary file 29 [file cp-11-869-2015-supplement.zip]

Sample 100

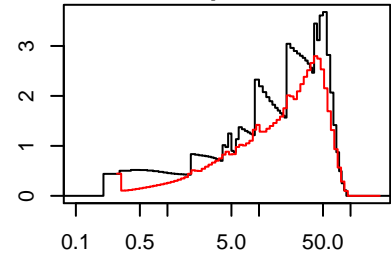

Sample 100 cumulative

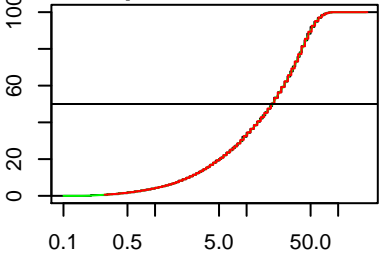

Sample statistics  
Mass conserved = 0.999  
Median(obs/new) = 19.5 / 19.29  
1%(obs/new) = 0.35 / 0.36  
5%(obs/new) = 1.15 / 1.24  
25%(obs/new) = 6.75 / 6.92  
75%(obs/new) = 37 / 35.05  
95%(obs/new) = 57.5 / 58.48  
99%(obs/new) = 72.5 / 75.53

Sample 130

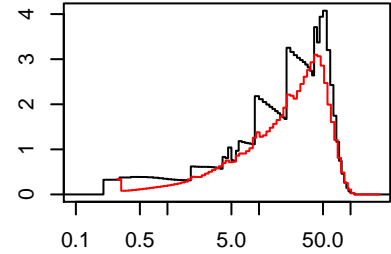

Sample 130 cumulative

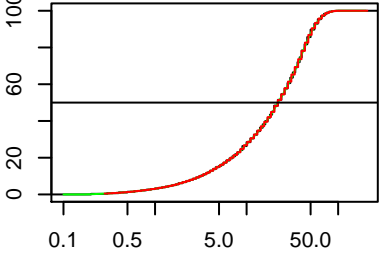

Sample statistics  
Mass conserved = 1  
Median(obs/new) = 23 / 22.88  
1%(obs/new) = 0.45 / 0.43  
5%(obs/new) = 1.55 / 1.61  
25%(obs/new) = 8.75 / 8.94  
75%(obs/new) = 39 / 38.18  
95%(obs/new) = 62.5 / 63.69  
99%(obs/new) = 77.5 / 75.53

5/25/50/75/95 percentiles

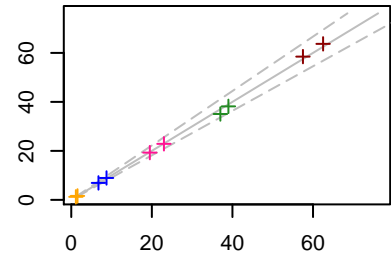

Xifeng percentiles

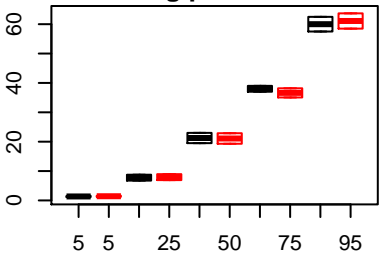

Site statistics  
Percentiles Pearson's corr. = 1  
Mean normalized bias = 0.01
