# Supplementary material for: Twelve thousand years of dust: the Holocene global dust cycle constrained by natural archives
Source: Copernicus journal article supplement (doi:10.5194/cp-11-869-2015), 2015-06-11
Supplement: Supplementary file 31 [file cp-11-869-2015-supplement.zip]

## GISP2

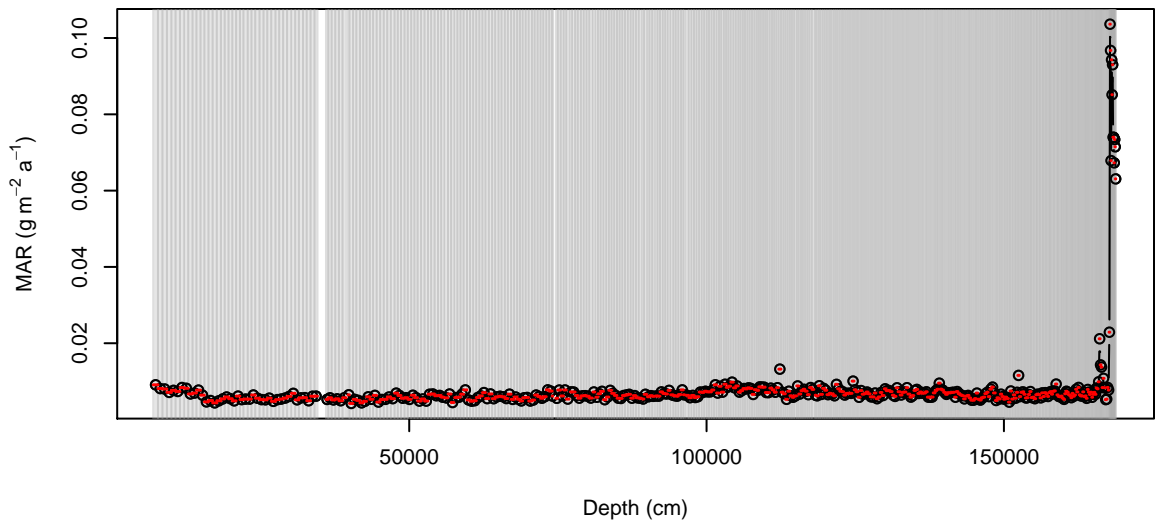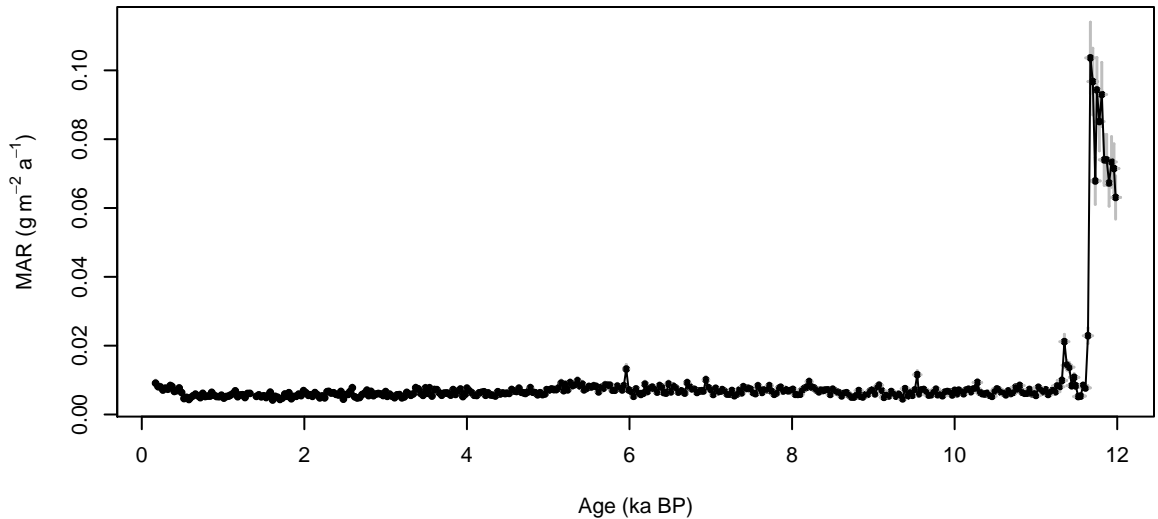

GISP2

Reference: Mayewski et al., 1997

Depth: depth intervals specified in paper

Age: Assuming age is center, continuous sampling (92% actually). Age is from Alley (2000).

Age error: from Alley (2000) chronology

SBMAR: from Alley (2000) chronology with ice thinning model

SBMAR err: Assume same as age relative error (reasonable for Holocene)

EC: Total Ca concentration, assuming a variable Ca/dust relation with climate, based on the d18O record.

Use 0.26 for warm and 0.095 for cold periods (Steffensen, 1997; Ruth et al. 2002)

Assuming warm if d18O > -37 per mil, and cold if d18O < -40, and used linear interpolation among those two values for the fractionation range in between.

EC err: Assume 20%, including analytical uncertainty and Ca-proxy uncertainty
