# Supplementary material for: Twelve thousand years of dust: the Holocene global dust cycle constrained by natural archives
Source: Copernicus journal article supplement (doi:10.5194/cp-11-869-2015), 2015-06-11
Supplement: Supplementary file 32 [file cp-11-869-2015-supplement.zip]

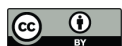

## *Supplement of*

# **Twelve thousand years of dust: the Holocene global dust cycle constrained by natural archives**

**S. Albani et al.**

*Correspondence to:* S. Albani (s.albani@cornell.edu)

- cp-11-869-2015-supplement-cover-letter.pdf
- Albani\_CPD\_14\_Supplementary\_material
  - Albani\_CPD\_Supplement.pdf
  - DATABASE.zip

The copyright of individual parts of the supplement might differ from the CC-BY 3.0 licence.
