# Supplementary material for: Twelve thousand years of dust: the Holocene global dust cycle constrained by natural archives
Source: Copernicus journal article supplement (doi:10.5194/cp-11-869-2015), 2015-06-11
Supplement: Supplementary file 33 [file cp-11-869-2015-supplement.zip]

## RC27-42

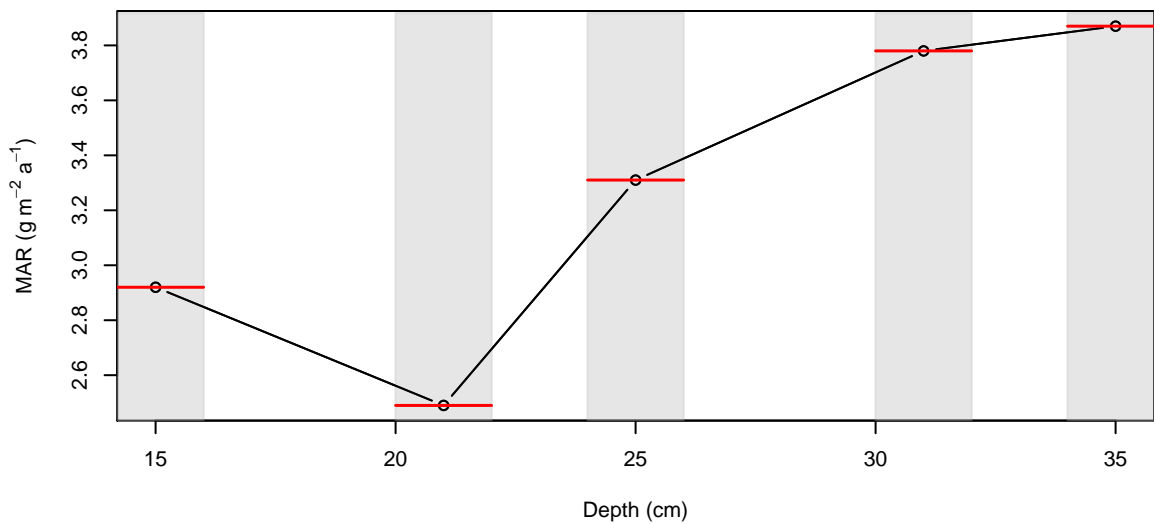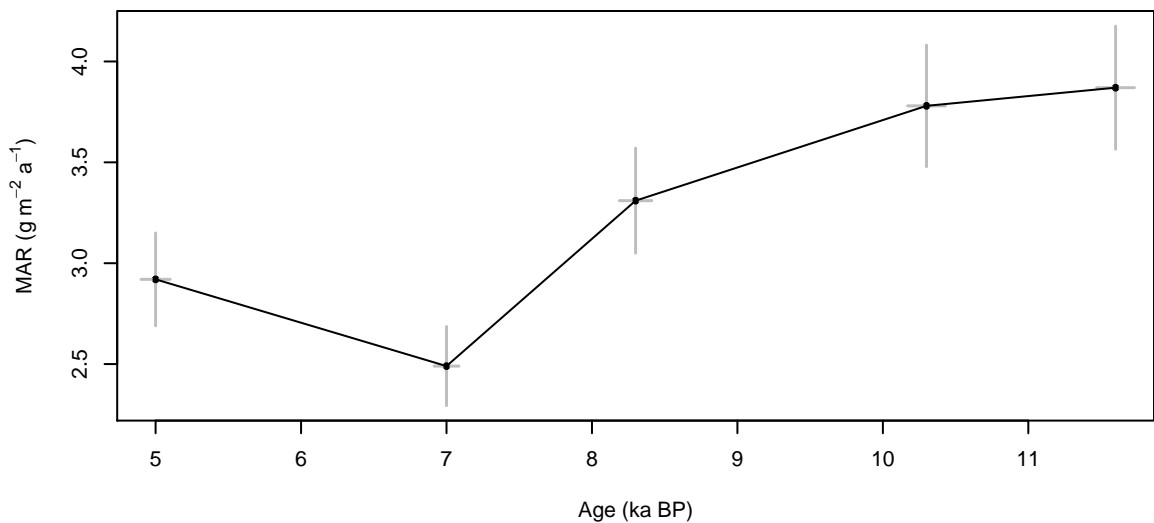

RC27-42

Reference: Pourmand et al. 2007

Depth: Depth intervals NOT specified in paper: assume 2cm

Age: Assuming age is center. Age is d180 + some 14C (foraminifera) - reservoir age (208 years)

Calib 5.0 (Stuiver & Reimer, 1993)

Age error: assume 6.8% (1 sigma)

SBMAR: 230Th

SBMAR err: assume 5% (1 sigma)

EC: 232Th-based dust concentration (10.7 ppm 230Th in dust;  $1/0.242530074$  dpm  $\rightarrow$  ppm)

EC err: assume 15% (1 sigma). Includes 232Th analytical error and error in 232Th as dust proxy
