# Supplementary material for: Twelve thousand years of dust: the Holocene global dust cycle constrained by natural archives
Source: Copernicus journal article supplement (doi:10.5194/cp-11-869-2015), 2015-06-11
Supplement: Supplementary file 35 [file cp-11-869-2015-supplement.zip]

Sample 1182.69

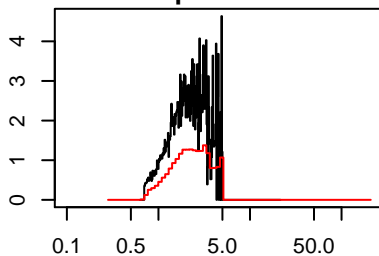

Sample 1182.69 cumulative

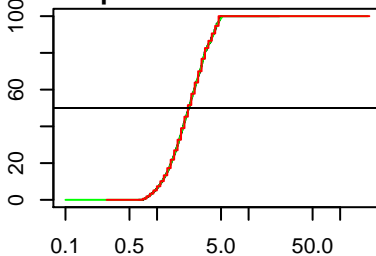

Sample statistics  
 Mass conserved = 1  
 Median(obs/new) = 2.23 / 2.27  
 1%(obs/new) = 0.75 / 0.73  
 5%(obs/new) = 0.96 / 0.95  
 25%(obs/new) = 1.55 / 1.61  
 75%(obs/new) = 3.1 / 3.2  
 95%(obs/new) = 4.45 / 4.51  
 99%(obs/new) = 4.9 / 4.91

Sample 1641.50

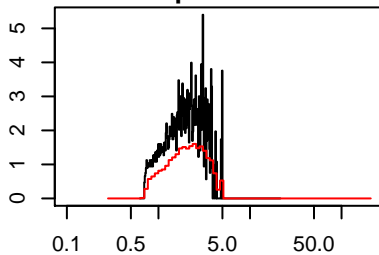

Sample 1641.50 cumulative

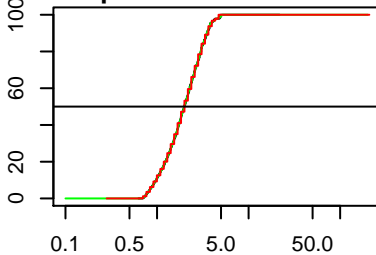

Sample statistics  
 Mass conserved = 1  
 Median(obs/new) = 1.99 / 1.91  
 1%(obs/new) = 0.73 / 0.73  
 5%(obs/new) = 0.84 / 0.87  
 25%(obs/new) = 1.37 / 1.35  
 75%(obs/new) = 2.82 / 2.7  
 95%(obs/new) = 3.82 / 3.8  
 99%(obs/new) = 4.84 / 4.91

Sample 2269.00

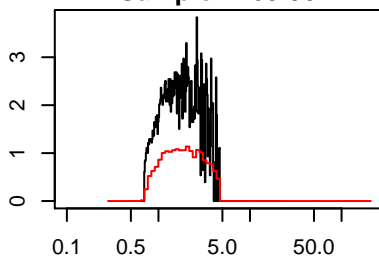

Sample 2269.00 cumulative

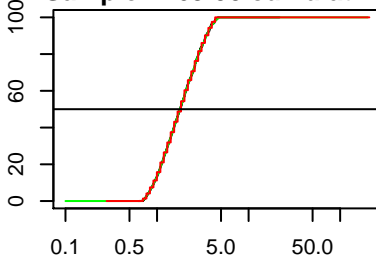

Sample statistics  
 Mass conserved = 1  
 Median(obs/new) = 1.78 / 1.75  
 1%(obs/new) = 0.72 / 0.73  
 5%(obs/new) = 0.82 / 0.8  
 25%(obs/new) = 1.21 / 1.24  
 75%(obs/new) = 2.63 / 2.7  
 95%(obs/new) = 3.87 / 3.8  
 99%(obs/new) = 4.51 / 4.51

Sample 2814.75

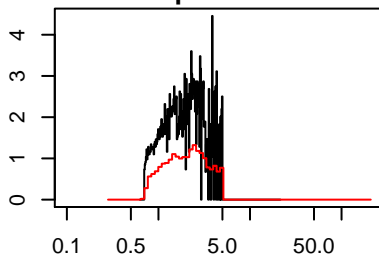

Sample 2814.75 cumulative

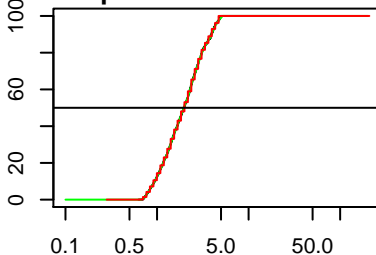

Sample statistics  
 Mass conserved = 1  
 Median(obs/new) = 1.96 / 1.91  
 1%(obs/new) = 0.72 / 0.73  
 5%(obs/new) = 0.82 / 0.8  
 25%(obs/new) = 1.3 / 1.24  
 75%(obs/new) = 2.86 / 2.94  
 95%(obs/new) = 4.33 / 4.51  
 99%(obs/new) = 4.9 / 4.91

Sample 3419.50

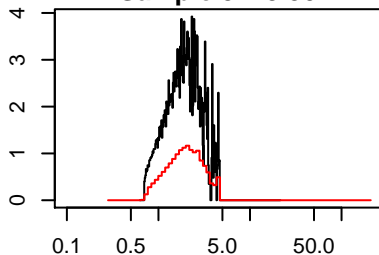

Sample 3419.50 cumulative

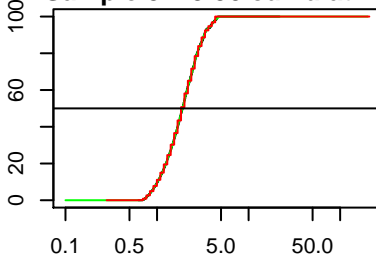

Sample statistics  
 Mass conserved = 1  
 Median(obs/new) = 1.88 / 1.91  
 1%(obs/new) = 0.74 / 0.73  
 5%(obs/new) = 0.88 / 0.87  
 25%(obs/new) = 1.35 / 1.35  
 75%(obs/new) = 2.56 / 2.47  
 95%(obs/new) = 3.87 / 3.8  
 99%(obs/new) = 4.51 / 4.51

Sample 3894.00

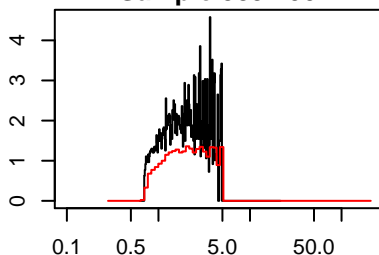

Sample 3894.00 cumulative

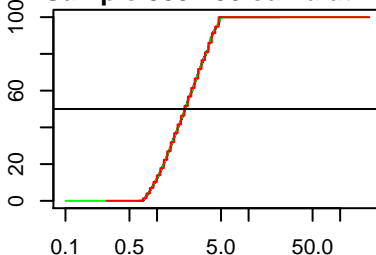

Sample statistics  
 Mass conserved = 1  
 Median(obs/new) = 2.02 / 2.08  
 1%(obs/new) = 0.72 / 0.73  
 5%(obs/new) = 0.82 / 0.8  
 25%(obs/new) = 1.3 / 1.35  
 75%(obs/new) = 3.1 / 3.2  
 95%(obs/new) = 4.51 / 4.51  
 99%(obs/new) = 4.84 / 4.91

Sample 4409.75

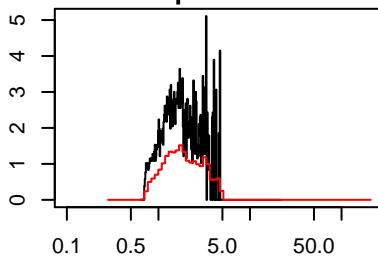

Sample 4409.75 cumulative

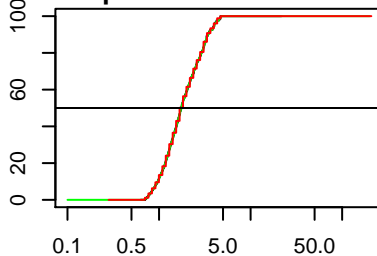

```

Sample statistics
Mass conserved = 1
Median(obs/new) = 1.76 / 1.75
1%(obs/new) = 0.73 / 0.73
5%(obs/new) = 0.84 / 0.87
25%(obs/new) = 1.26 / 1.24
75%(obs/new) = 2.63 / 2.7
95%(obs/new) = 3.93 / 4.14
99%(obs/new) = 4.58 / 4.51

```

Sample 4963.00

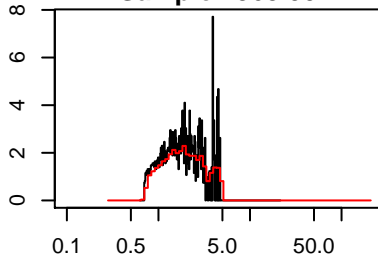

Sample 4963.00 cumulative

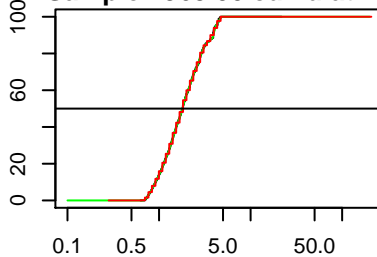

```

Sample statistics
Mass conserved = 1
Median(obs/new) = 1.81 / 1.75
1%(obs/new) = 0.72 / 0.73
5%(obs/new) = 0.81 / 0.8
25%(obs/new) = 1.23 / 1.24
75%(obs/new) = 2.7 / 2.7
95%(obs/new) = 4.1 / 4.14
99%(obs/new) = 4.51 / 4.91

```

Sample 5567.75

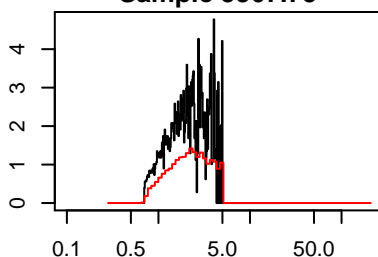

Sample 5567.75 cumulative

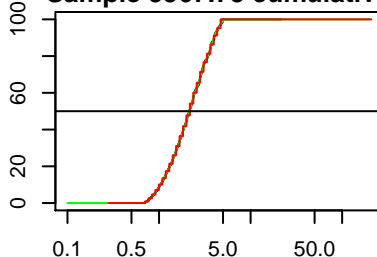

```

Sample statistics
Mass conserved = 1
Median(obs/new) = 2.13 / 2.08
1%(obs/new) = 0.74 / 0.73
5%(obs/new) = 0.89 / 0.87
25%(obs/new) = 1.45 / 1.47
75%(obs/new) = 3.06 / 3.2
95%(obs/new) = 4.39 / 4.51
99%(obs/new) = 4.84 / 4.91

```

Sample 6147.00

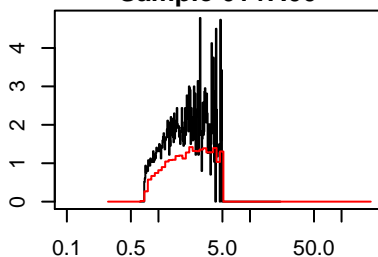

Sample 6147.00 cumulative

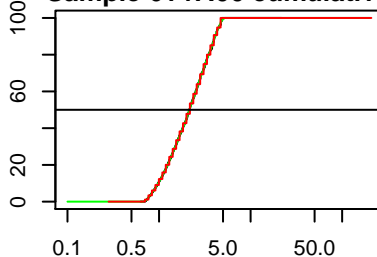

```

Sample statistics
Mass conserved = 1
Median(obs/new) = 2.16 / 2.08
1%(obs/new) = 0.73 / 0.73
5%(obs/new) = 0.84 / 0.87
25%(obs/new) = 1.37 / 1.35
75%(obs/new) = 3.19 / 3.2
95%(obs/new) = 4.51 / 4.51
99%(obs/new) = 4.84 / 4.91

```

Sample 6665.00

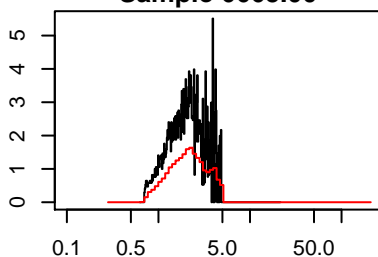

Sample 6665.00 cumulative

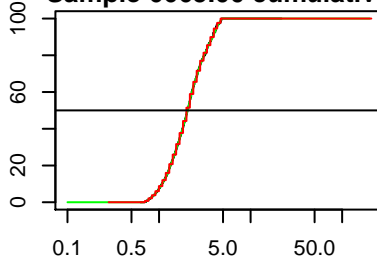

```

Sample statistics
Mass conserved = 1
Median(obs/new) = 2.05 / 2.08
1%(obs/new) = 0.74 / 0.73
5%(obs/new) = 0.92 / 0.95
25%(obs/new) = 1.45 / 1.47
75%(obs/new) = 2.82 / 2.94
95%(obs/new) = 4.21 / 4.14
99%(obs/new) = 4.77 / 4.91

```

Sample 7160.00

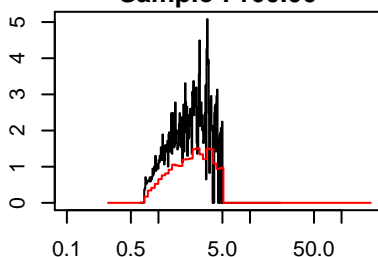

Sample 7160.00 cumulative

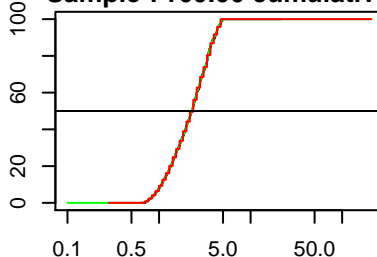

```

Sample statistics
Mass conserved = 1
Median(obs/new) = 2.29 / 2.27
1%(obs/new) = 0.74 / 0.73
5%(obs/new) = 0.9 / 0.87
25%(obs/new) = 1.49 / 1.47
75%(obs/new) = 3.24 / 3.2
95%(obs/new) = 4.39 / 4.51
99%(obs/new) = 4.84 / 4.91

```

Sample 7765.00

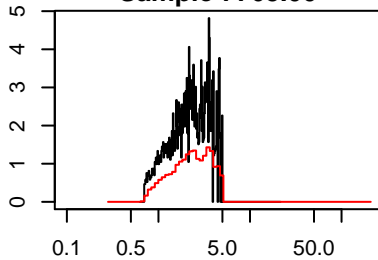

Sample 7765.00 cumulative

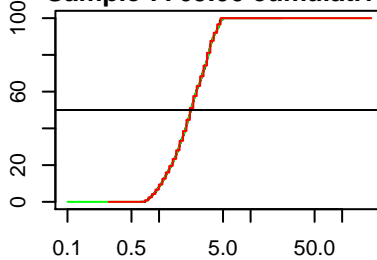

Sample statistics  
 Mass conserved = 1  
 Median(obs/new) = 2.23 / 2.27  
 1%(obs/new) = 0.74 / 0.73  
 5%(obs/new) = 0.9 / 0.87  
 25%(obs/new) = 1.53 / 1.47  
 75%(obs/new) = 3.24 / 3.2  
 95%(obs/new) = 4.39 / 4.51  
 99%(obs/new) = 4.7 / 4.91

Sample 8260.00

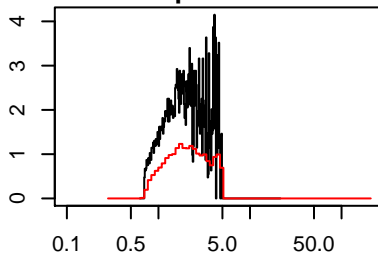

Sample 8260.00 cumulative

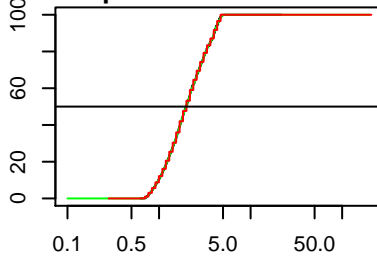

Sample statistics  
 Mass conserved = 1  
 Median(obs/new) = 1.99 / 1.91  
 1%(obs/new) = 0.73 / 0.73  
 5%(obs/new) = 0.86 / 0.87  
 25%(obs/new) = 1.35 / 1.35  
 75%(obs/new) = 2.98 / 2.94  
 95%(obs/new) = 4.39 / 4.51  
 99%(obs/new) = 4.7 / 4.91

Sample 9415.00

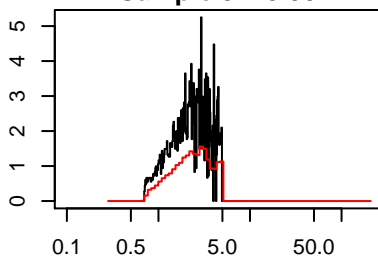

Sample 9415.00 cumulative

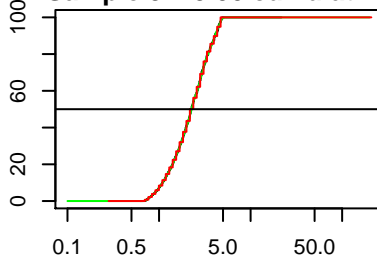

Sample statistics  
 Mass conserved = 1  
 Median(obs/new) = 2.26 / 2.27  
 1%(obs/new) = 0.74 / 0.73  
 5%(obs/new) = 0.92 / 0.95  
 25%(obs/new) = 1.55 / 1.61  
 75%(obs/new) = 3.19 / 3.2  
 95%(obs/new) = 4.45 / 4.51  
 99%(obs/new) = 4.84 / 4.91

Sample 9957.50

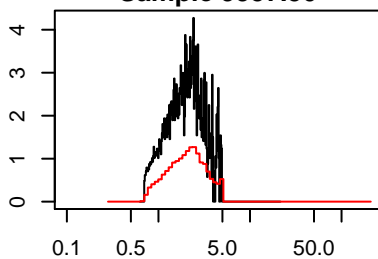

Sample 9957.50 cumulative

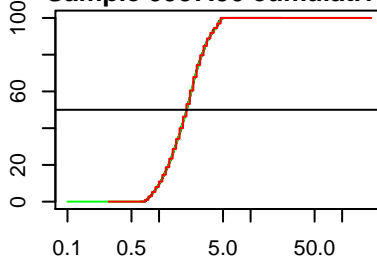

Sample statistics  
 Mass conserved = 1  
 Median(obs/new) = 1.99 / 2.08  
 1%(obs/new) = 0.73 / 0.73  
 5%(obs/new) = 0.87 / 0.87  
 25%(obs/new) = 1.39 / 1.35  
 75%(obs/new) = 2.7 / 2.7  
 95%(obs/new) = 4.27 / 4.14  
 99%(obs/new) = 4.77 / 4.91

Sample 10232.50

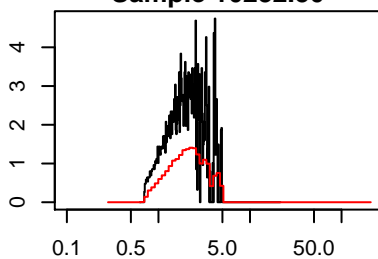

Sample 10232.50 cumulative

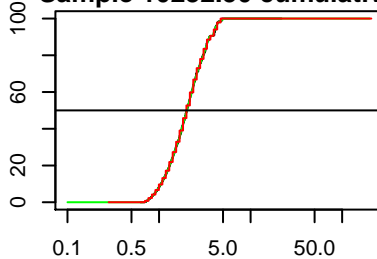

Sample statistics  
 Mass conserved = 1  
 Median(obs/new) = 2.02 / 2.08  
 1%(obs/new) = 0.74 / 0.73  
 5%(obs/new) = 0.9 / 0.87  
 25%(obs/new) = 1.43 / 1.47  
 75%(obs/new) = 2.78 / 2.7  
 95%(obs/new) = 4.15 / 4.14  
 99%(obs/new) = 4.84 / 4.91

Sample 10562.50

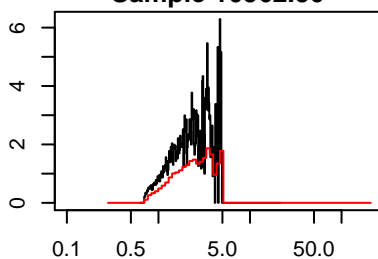

Sample 10562.50 cumulative

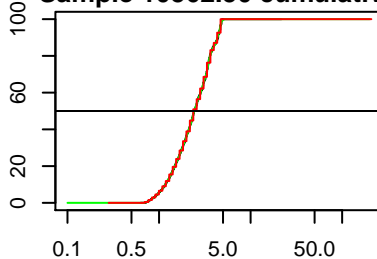

Sample statistics  
 Mass conserved = 1  
 Median(obs/new) = 2.42 / 2.47  
 1%(obs/new) = 0.78 / 0.73  
 5%(obs/new) = 0.98 / 0.95  
 25%(obs/new) = 1.64 / 1.61  
 75%(obs/new) = 3.42 / 3.49  
 95%(obs/new) = 4.64 / 4.51  
 99%(obs/new) = 4.84 / 4.91

Sample 11057.50

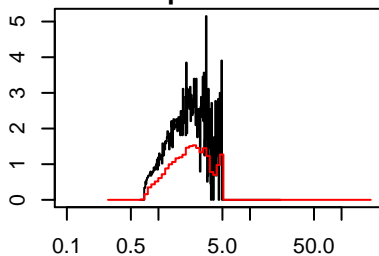

Sample 11057.50 cumulative

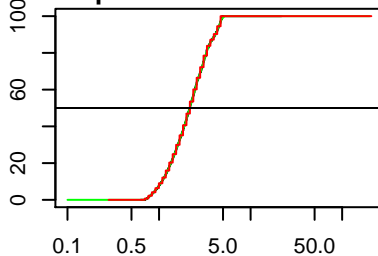

Sample statistics  
 Mass conserved = 1  
 Median(obs/new) = 2.16 / 2.08  
 1%(obs/new) = 0.75 / 0.73  
 5%(obs/new) = 0.9 / 0.87  
 25%(obs/new) = 1.47 / 1.47  
 75%(obs/new) = 3.06 / 2.94  
 95%(obs/new) = 4.51 / 4.51  
 99%(obs/new) = 4.84 / 4.91

Sample 11382.00

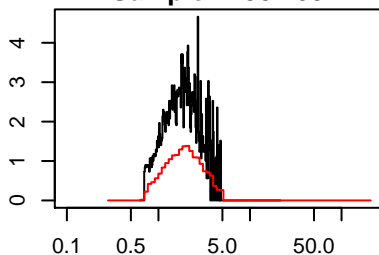

Sample 11382.00 cumulative

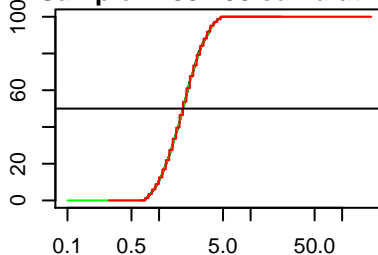

Sample statistics  
 Mass conserved = 1  
 Median(obs/new) = 1.83 / 1.75  
 1%(obs/new) = 0.72 / 0.73  
 5%(obs/new) = 0.84 / 0.87  
 25%(obs/new) = 1.3 / 1.35  
 75%(obs/new) = 2.52 / 2.47  
 95%(obs/new) = 3.82 / 3.8  
 99%(obs/new) = 4.39 / 4.51

Sample 11552.50

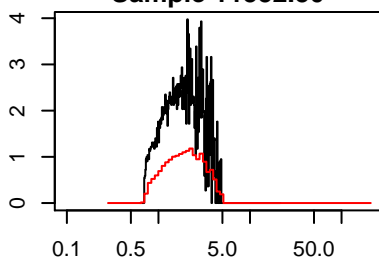

Sample 11552.50 cumulative

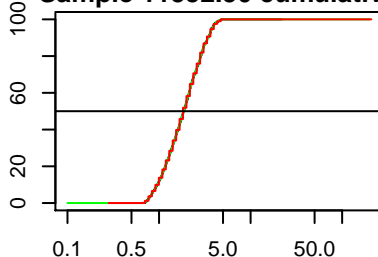

Sample statistics  
 Mass conserved = 1  
 Median(obs/new) = 1.86 / 1.91  
 1%(obs/new) = 0.73 / 0.73  
 5%(obs/new) = 0.83 / 0.8  
 25%(obs/new) = 1.28 / 1.24  
 75%(obs/new) = 2.66 / 2.7  
 95%(obs/new) = 3.77 / 3.8  
 99%(obs/new) = 4.39 / 4.51

Sample 12157.50

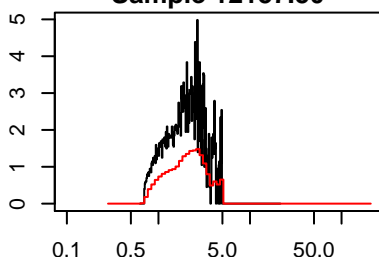

Sample 12157.50 cumulative

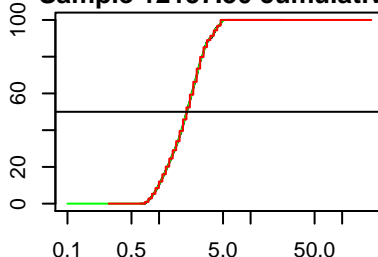

Sample statistics  
 Mass conserved = 1  
 Median(obs/new) = 2.02 / 2.08  
 1%(obs/new) = 0.74 / 0.73  
 5%(obs/new) = 0.87 / 0.87  
 25%(obs/new) = 1.37 / 1.35  
 75%(obs/new) = 2.74 / 2.7  
 95%(obs/new) = 4.15 / 4.14  
 99%(obs/new) = 4.84 / 4.91

Sample 12432.50

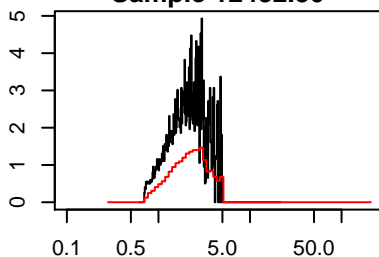

Sample 12432.50 cumulative

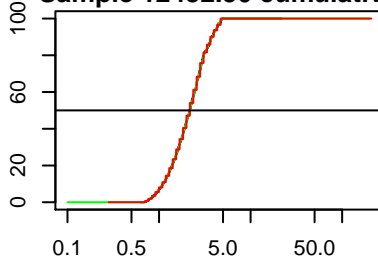

Sample statistics  
 Mass conserved = 1  
 Median(obs/new) = 2.16 / 2.08  
 1%(obs/new) = 0.72 / 0.73  
 5%(obs/new) = 0.94 / 0.95  
 25%(obs/new) = 1.51 / 1.47  
 75%(obs/new) = 2.9 / 2.94  
 95%(obs/new) = 4.27 / 4.14  
 99%(obs/new) = 4.77 / 4.91

Sample 12707.50

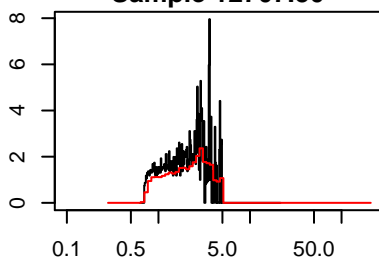

Sample 12707.50 cumulative

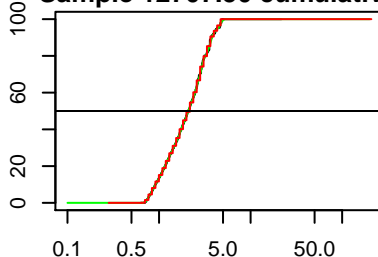

Sample statistics  
 Mass conserved = 1  
 Median(obs/new) = 2.08 / 2.08  
 1%(obs/new) = 0.72 / 0.73  
 5%(obs/new) = 0.81 / 0.8  
 25%(obs/new) = 1.3 / 1.35  
 75%(obs/new) = 2.94 / 2.94  
 95%(obs/new) = 4.39 / 4.14  
 99%(obs/new) = 4.84 / 4.91

Sample 13337.50

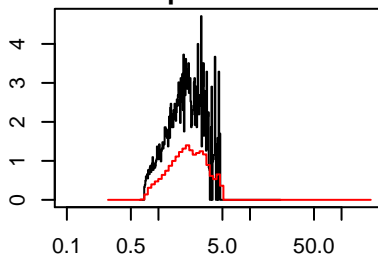

Sample 13337.50 cumulative

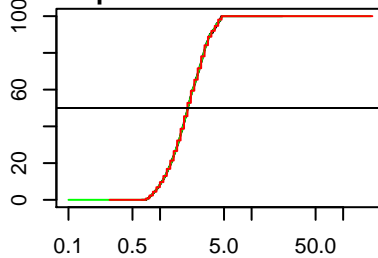

Sample statistics  
 Mass conserved = 1  
 Median(obs/new) = 2.02 / 2.08  
 1%(obs/new) = 0.74 / 0.73  
 5%(obs/new) = 0.89 / 0.87  
 25%(obs/new) = 1.43 / 1.47  
 75%(obs/new) = 2.82 / 2.94  
 95%(obs/new) = 4.1 / 4.14  
 99%(obs/new) = 4.58 / 4.51

Sample 13422.50

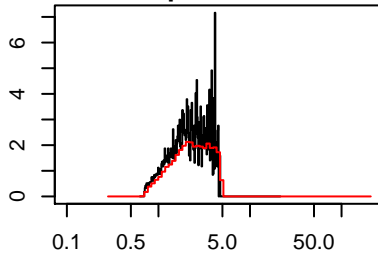

Sample 13422.50 cumulative

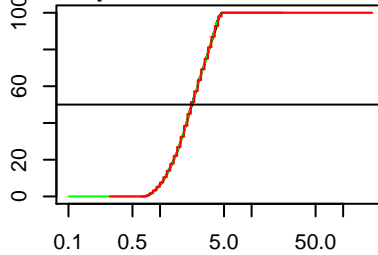

Sample statistics  
 Mass conserved = 1  
 Median(obs/new) = 2.26 / 2.27  
 1%(obs/new) = 0.77 / 0.73  
 5%(obs/new) = 0.94 / 0.95  
 25%(obs/new) = 1.55 / 1.61  
 75%(obs/new) = 3.19 / 3.2  
 95%(obs/new) = 4.21 / 4.14  
 99%(obs/new) = 4.51 / 4.51

Sample 13807.50

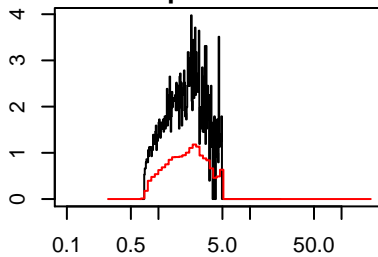

Sample 13807.50 cumulative

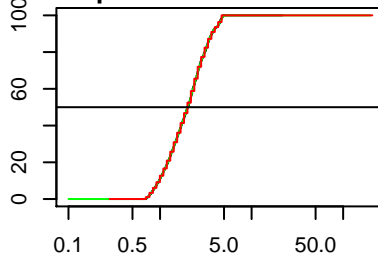

Sample statistics  
 Mass conserved = 1  
 Median(obs/new) = 2.02 / 2.08  
 1%(obs/new) = 0.73 / 0.73  
 5%(obs/new) = 0.84 / 0.87  
 25%(obs/new) = 1.33 / 1.35  
 75%(obs/new) = 2.82 / 2.94  
 95%(obs/new) = 4.39 / 4.51  
 99%(obs/new) = 4.77 / 4.91

Sample 14192.50

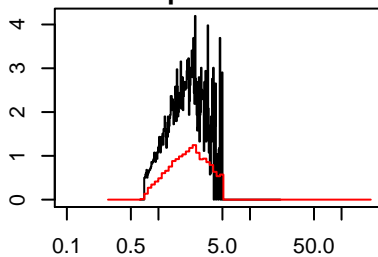

Sample 14192.50 cumulative

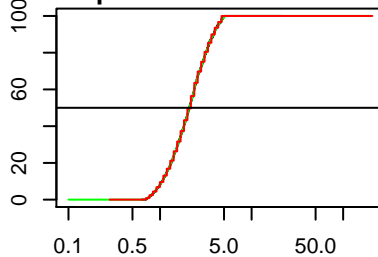

Sample statistics  
 Mass conserved = 1  
 Median(obs/new) = 2.08 / 2.08  
 1%(obs/new) = 0.74 / 0.73  
 5%(obs/new) = 0.89 / 0.87  
 25%(obs/new) = 1.45 / 1.47  
 75%(obs/new) = 2.94 / 2.94  
 95%(obs/new) = 4.33 / 4.14  
 99%(obs/new) = 4.9 / 4.91

Sample 14412.50

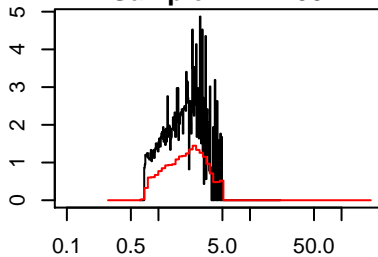

Sample 14412.50 cumulative

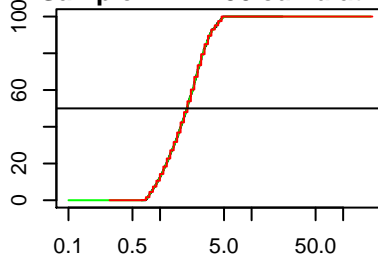

Sample statistics  
 Mass conserved = 1  
 Median(obs/new) = 1.96 / 1.91  
 1%(obs/new) = 0.72 / 0.73  
 5%(obs/new) = 0.81 / 0.8  
 25%(obs/new) = 1.3 / 1.35  
 75%(obs/new) = 2.74 / 2.7  
 95%(obs/new) = 4.15 / 4.14  
 99%(obs/new) = 4.77 / 4.91

Sample 14617.50

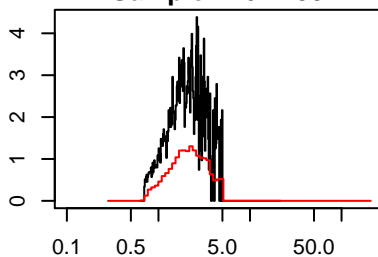

Sample 14617.50 cumulative

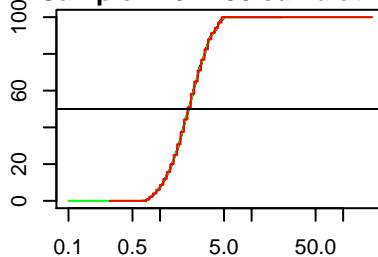

Sample statistics  
 Mass conserved = 1  
 Median(obs/new) = 2.08 / 2.08  
 1%(obs/new) = 0.74 / 0.73  
 5%(obs/new) = 0.92 / 0.87  
 25%(obs/new) = 1.47 / 1.47  
 75%(obs/new) = 2.86 / 2.94  
 95%(obs/new) = 4.27 / 4.14  
 99%(obs/new) = 4.84 / 4.91

Sample 15017.50

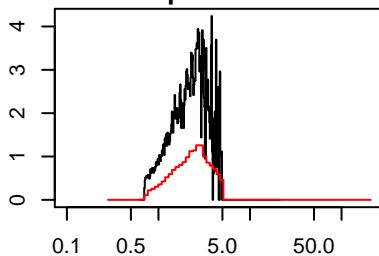

Sample 15017.50 cumulative

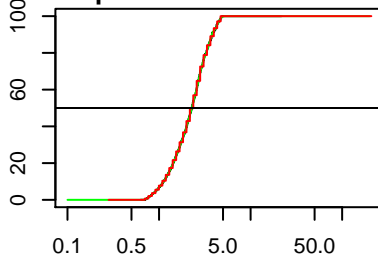

Sample statistics  
 Mass conserved = 1  
 Median(obs/new) = 2.29 / 2.27  
 1%(obs/new) = 0.74 / 0.73  
 5%(obs/new) = 0.93 / 0.95  
 25%(obs/new) = 1.57 / 1.61  
 75%(obs/new) = 3.02 / 2.94  
 95%(obs/new) = 4.27 / 4.14  
 99%(obs/new) = 4.77 / 4.91

Sample 15512.50

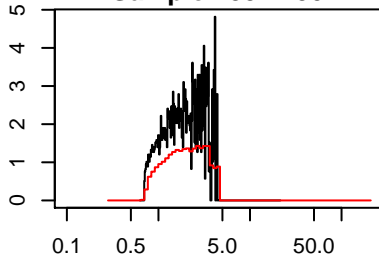

Sample 15512.50 cumulative

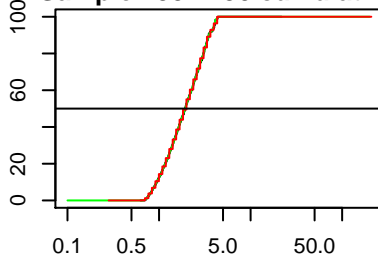

Sample statistics  
 Mass conserved = 1  
 Median(obs/new) = 1.94 / 1.91  
 1%(obs/new) = 0.72 / 0.73  
 5%(obs/new) = 0.83 / 0.8  
 25%(obs/new) = 1.28 / 1.24  
 75%(obs/new) = 2.82 / 2.94  
 95%(obs/new) = 4.04 / 4.14  
 99%(obs/new) = 4.33 / 4.51

Sample 15732.50

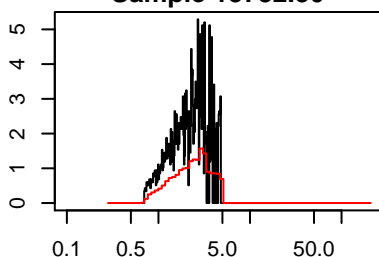

Sample 15732.50 cumulative

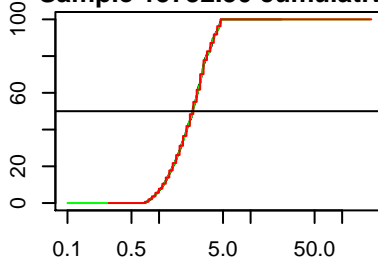

Sample statistics  
 Mass conserved = 1  
 Median(obs/new) = 2.32 / 2.27  
 1%(obs/new) = 0.75 / 0.73  
 5%(obs/new) = 0.93 / 0.95  
 25%(obs/new) = 1.57 / 1.61  
 75%(obs/new) = 3.06 / 3.2  
 95%(obs/new) = 4.39 / 4.51  
 99%(obs/new) = 4.7 / 4.91

Sample 16062.50

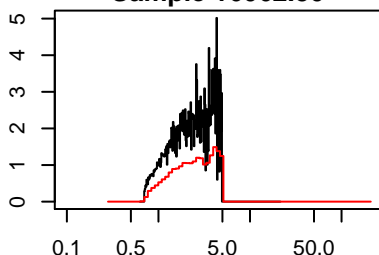

Sample 16062.50 cumulative

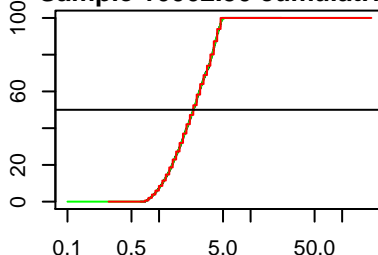

Sample statistics  
 Mass conserved = 1  
 Median(obs/new) = 2.39 / 2.47  
 1%(obs/new) = 0.75 / 0.73  
 5%(obs/new) = 0.92 / 0.95  
 25%(obs/new) = 1.53 / 1.47  
 75%(obs/new) = 3.57 / 3.49  
 95%(obs/new) = 4.58 / 4.51  
 99%(obs/new) = 4.84 / 4.91

Sample 16557.50

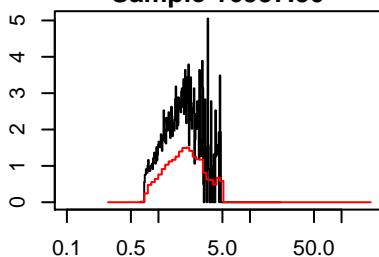

Sample 16557.50 cumulative

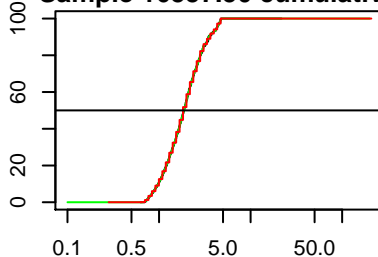

Sample statistics  
 Mass conserved = 1  
 Median(obs/new) = 1.86 / 1.91  
 1%(obs/new) = 0.73 / 0.73  
 5%(obs/new) = 0.84 / 0.87  
 25%(obs/new) = 1.31 / 1.35  
 75%(obs/new) = 2.63 / 2.7  
 95%(obs/new) = 4.27 / 4.14  
 99%(obs/new) = 4.7 / 4.91

Sample 16722.50

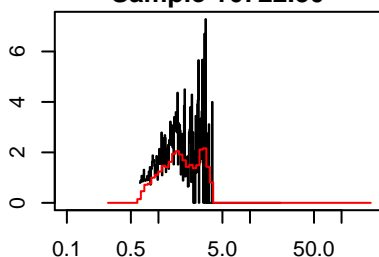

Sample 16722.50 cumulative

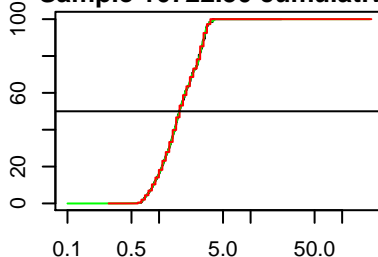

Sample statistics  
 Mass conserved = 1  
 Median(obs/new) = 1.66 / 1.75  
 1%(obs/new) = 0.65 / 0.62  
 5%(obs/new) = 0.74 / 0.73  
 25%(obs/new) = 1.18 / 1.14  
 75%(obs/new) = 2.59 / 2.47  
 95%(obs/new) = 3.28 / 3.49  
 99%(obs/new) = 3.57 / 3.8

Sample 16817.50

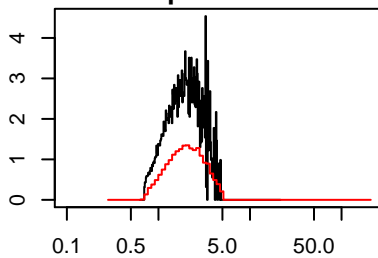

Sample 16817.50 cumulative

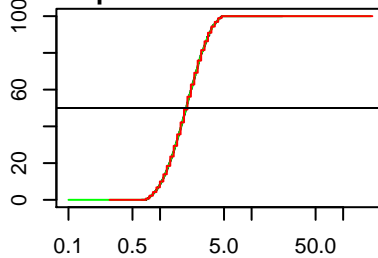

Sample statistics  
 Mass conserved = 1  
 Median(obs/new) = 1.94 / 1.91  
 1%(obs/new) = 0.74 / 0.73  
 5%(obs/new) = 0.9 / 0.87  
 25%(obs/new) = 1.39 / 1.35  
 75%(obs/new) = 2.66 / 2.7  
 95%(obs/new) = 3.82 / 3.8  
 99%(obs/new) = 4.51 / 4.51

Sample 16992.00

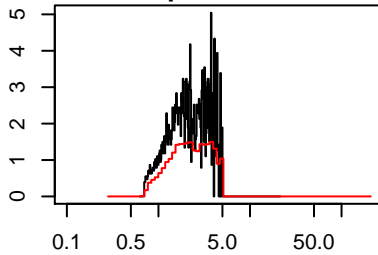

Sample 16992.00 cumulative

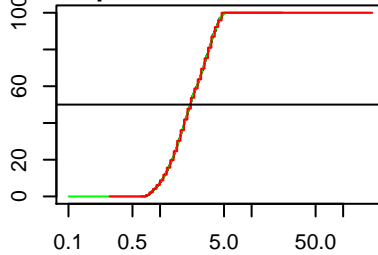

Sample statistics  
 Mass conserved = 1  
 Median(obs/new) = 2.16 / 2.08  
 1%(obs/new) = 0.74 / 0.73  
 5%(obs/new) = 0.92 / 0.87  
 25%(obs/new) = 1.49 / 1.47  
 75%(obs/new) = 3.19 / 3.2  
 95%(obs/new) = 4.33 / 4.51  
 99%(obs/new) = 4.9 / 4.91

Sample 17162.50

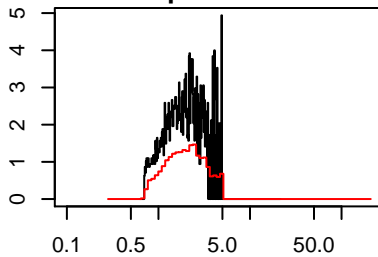

Sample 17162.50 cumulative

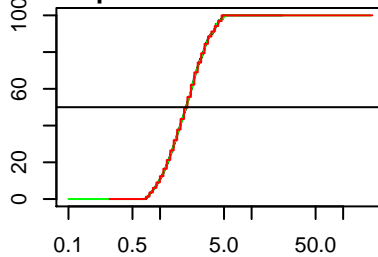

Sample statistics  
 Mass conserved = 1  
 Median(obs/new) = 1.94 / 1.91  
 1%(obs/new) = 0.72 / 0.73  
 5%(obs/new) = 0.84 / 0.87  
 25%(obs/new) = 1.31 / 1.35  
 75%(obs/new) = 2.7 / 2.7  
 95%(obs/new) = 4.15 / 4.14  
 99%(obs/new) = 4.64 / 4.91

Sample 17657.50

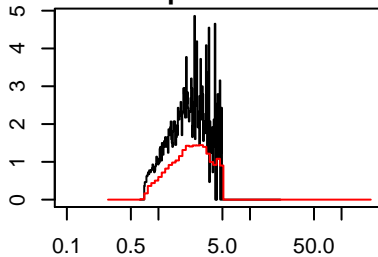

Sample 17657.50 cumulative

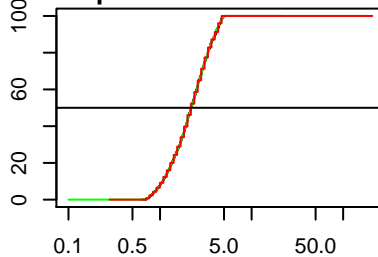

Sample statistics  
 Mass conserved = 1  
 Median(obs/new) = 2.19 / 2.27  
 1%(obs/new) = 0.74 / 0.73  
 5%(obs/new) = 0.9 / 0.87  
 25%(obs/new) = 1.49 / 1.47  
 75%(obs/new) = 3.1 / 3.2  
 95%(obs/new) = 4.45 / 4.51  
 99%(obs/new) = 4.84 / 4.91

Sample 17822.50

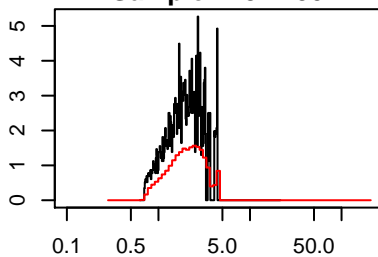

Sample 17822.50 cumulative

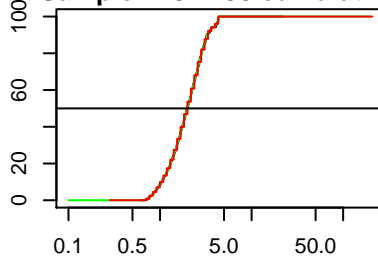

Sample statistics  
 Mass conserved = 1  
 Median(obs/new) = 1.96 / 1.91  
 1%(obs/new) = 0.74 / 0.73  
 5%(obs/new) = 0.89 / 0.87  
 25%(obs/new) = 1.43 / 1.47  
 75%(obs/new) = 2.7 / 2.7  
 95%(obs/new) = 4.1 / 3.8  
 99%(obs/new) = 4.33 / 4.51

Sample 17933.50

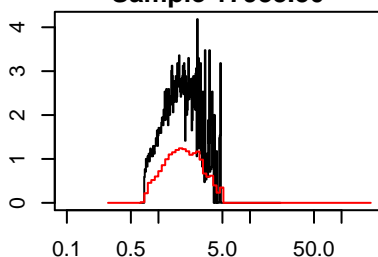

Sample 17933.50 cumulative

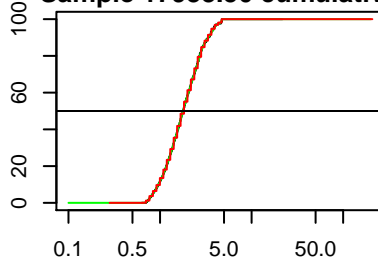

Sample statistics  
 Mass conserved = 1  
 Median(obs/new) = 1.78 / 1.75  
 1%(obs/new) = 0.72 / 0.73  
 5%(obs/new) = 0.83 / 0.8  
 25%(obs/new) = 1.26 / 1.24  
 75%(obs/new) = 2.52 / 2.47  
 95%(obs/new) = 3.87 / 3.8  
 99%(obs/new) = 4.7 / 4.51

Sample 18042.50

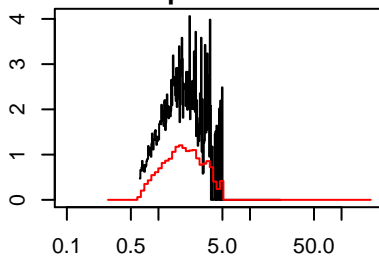

Sample 18042.50 cumulative

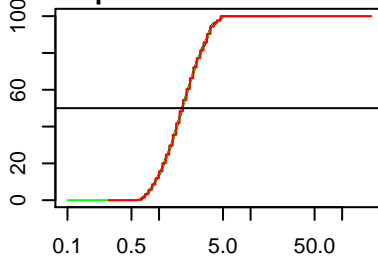

Sample statistics  
 Mass conserved = 1  
 Median(obs/new) = 1.78 / 1.75  
 1%(obs/new) = 0.66 / 0.67  
 5%(obs/new) = 0.79 / 0.8  
 25%(obs/new) = 1.24 / 1.24  
 75%(obs/new) = 2.56 / 2.7  
 95%(obs/new) = 3.82 / 3.8  
 99%(obs/new) = 4.77 / 4.91

Sample 18812.50

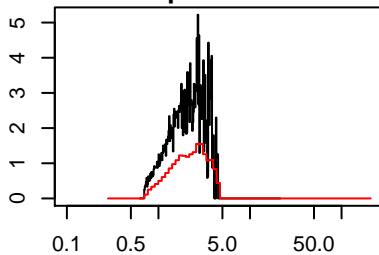

Sample 18812.50 cumulative

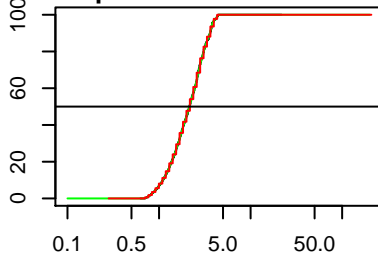

Sample statistics  
 Mass conserved = 1  
 Median(obs/new) = 2.13 / 2.08  
 1%(obs/new) = 0.77 / 0.73  
 5%(obs/new) = 0.93 / 0.95  
 25%(obs/new) = 1.51 / 1.47  
 75%(obs/new) = 2.9 / 2.94  
 95%(obs/new) = 3.82 / 3.8  
 99%(obs/new) = 4.33 / 4.51

Sample 18923.00

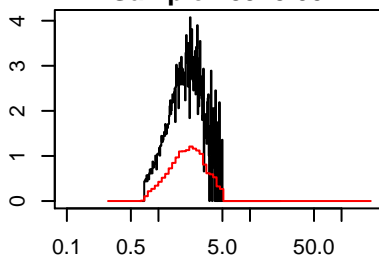

Sample 18923.00 cumulative

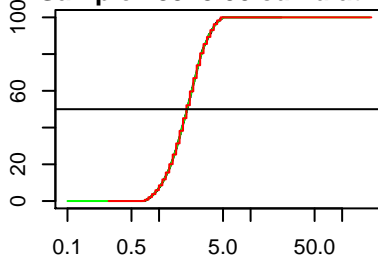

Sample statistics  
 Mass conserved = 1  
 Median(obs/new) = 2.02 / 2.08  
 1%(obs/new) = 0.74 / 0.73  
 5%(obs/new) = 0.92 / 0.95  
 25%(obs/new) = 1.47 / 1.47  
 75%(obs/new) = 2.7 / 2.7  
 95%(obs/new) = 3.98 / 4.14  
 99%(obs/new) = 4.64 / 4.51

Sample 18962.50

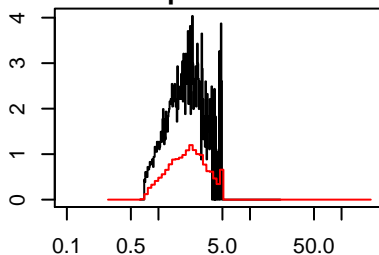

Sample 18962.50 cumulative

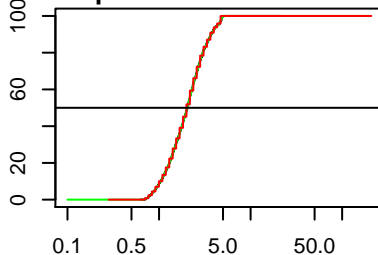

Sample statistics  
 Mass conserved = 1  
 Median(obs/new) = 2.05 / 2.08  
 1%(obs/new) = 0.74 / 0.73  
 5%(obs/new) = 0.89 / 0.87  
 25%(obs/new) = 1.41 / 1.35  
 75%(obs/new) = 2.78 / 2.7  
 95%(obs/new) = 4.33 / 4.51  
 99%(obs/new) = 4.84 / 4.91

Sample 19857.50

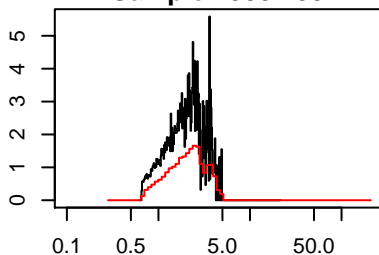

Sample 19857.50 cumulative

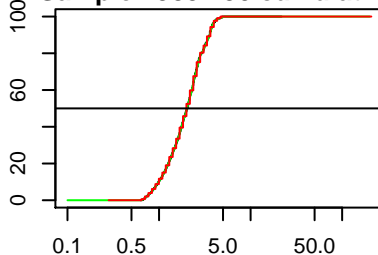

Sample statistics  
 Mass conserved = 1  
 Median(obs/new) = 2.02 / 2.08  
 1%(obs/new) = 0.69 / 0.67  
 5%(obs/new) = 0.84 / 0.8  
 25%(obs/new) = 1.39 / 1.35  
 75%(obs/new) = 2.66 / 2.7  
 95%(obs/new) = 3.82 / 3.8  
 99%(obs/new) = 4.33 / 4.51

Sample 20117.50

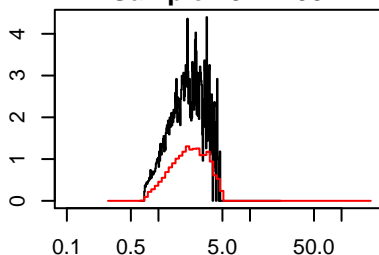

Sample 20117.50 cumulative

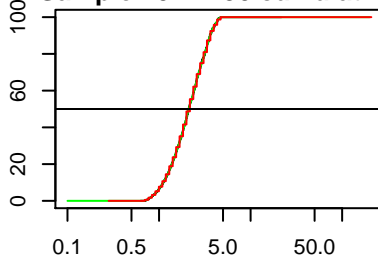

Sample statistics  
 Mass conserved = 1  
 Median(obs/new) = 2.11 / 2.08  
 1%(obs/new) = 0.77 / 0.73  
 5%(obs/new) = 0.96 / 0.95  
 25%(obs/new) = 1.51 / 1.47  
 75%(obs/new) = 2.9 / 2.94  
 95%(obs/new) = 4.04 / 4.14  
 99%(obs/new) = 4.45 / 4.51



Sample 20138.00

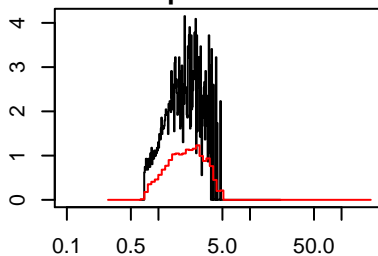

Sample 20138.00 cumulative

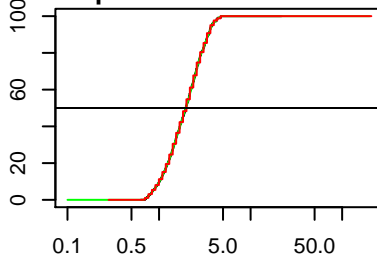

Sample statistics  
 Mass conserved = 1  
 Median(obs/new) = 1.96 / 1.91  
 1%(obs/new) = 0.73 / 0.73  
 5%(obs/new) = 0.87 / 0.87  
 25%(obs/new) = 1.37 / 1.35  
 75%(obs/new) = 2.7 / 2.7  
 95%(obs/new) = 3.72 / 3.8  
 99%(obs/new) = 4.39 / 4.51

Sample 20462.50

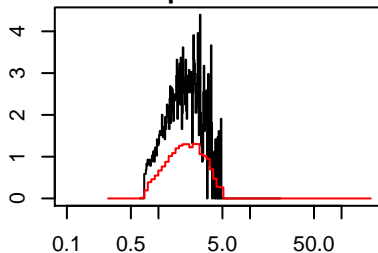

Sample 20462.50 cumulative

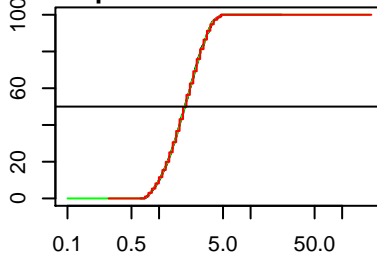

Sample statistics  
 Mass conserved = 1  
 Median(obs/new) = 1.91 / 1.91  
 1%(obs/new) = 0.73 / 0.73  
 5%(obs/new) = 0.87 / 0.87  
 25%(obs/new) = 1.35 / 1.35  
 75%(obs/new) = 2.66 / 2.7  
 95%(obs/new) = 3.77 / 3.8  
 99%(obs/new) = 4.58 / 4.51

Sample 20957.50

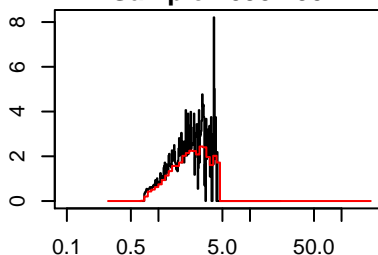

Sample 20957.50 cumulative

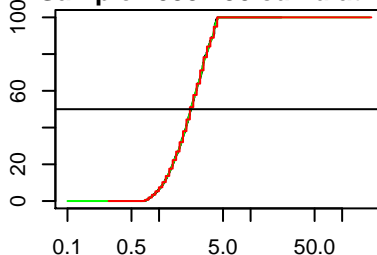

Sample statistics  
 Mass conserved = 1  
 Median(obs/new) = 2.23 / 2.27  
 1%(obs/new) = 0.75 / 0.73  
 5%(obs/new) = 0.94 / 0.95  
 25%(obs/new) = 1.55 / 1.61  
 75%(obs/new) = 3.06 / 3.2  
 95%(obs/new) = 4.04 / 4.14  
 99%(obs/new) = 4.27 / 4.51

Sample 21217.50

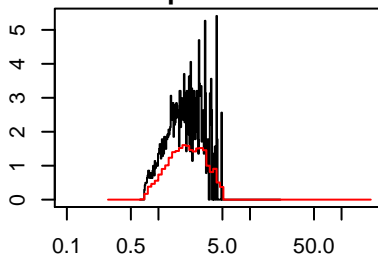

Sample 21217.50 cumulative

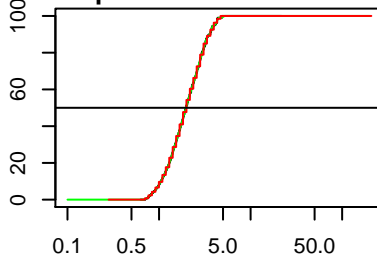

Sample statistics  
 Mass conserved = 1  
 Median(obs/new) = 1.96 / 1.91  
 1%(obs/new) = 0.75 / 0.73  
 5%(obs/new) = 0.9 / 0.87  
 25%(obs/new) = 1.39 / 1.35  
 75%(obs/new) = 2.78 / 2.7  
 95%(obs/new) = 4.04 / 4.14  
 99%(obs/new) = 4.39 / 4.51

Sample 22112.50

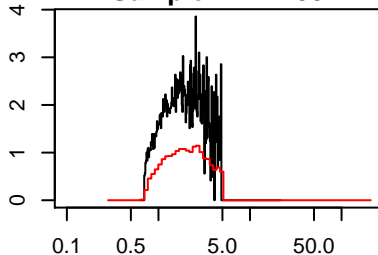

Sample 22112.50 cumulative

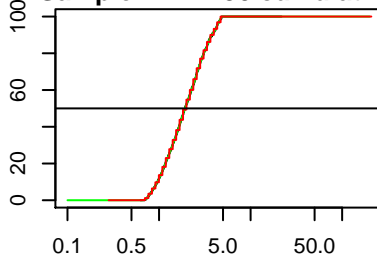

Sample statistics  
 Mass conserved = 1  
 Median(obs/new) = 1.91 / 1.91  
 1%(obs/new) = 0.75 / 0.73  
 5%(obs/new) = 0.84 / 0.87  
 25%(obs/new) = 1.28 / 1.24  
 75%(obs/new) = 2.82 / 2.94  
 95%(obs/new) = 4.27 / 4.14  
 99%(obs/new) = 4.77 / 4.91

Sample 22222.50

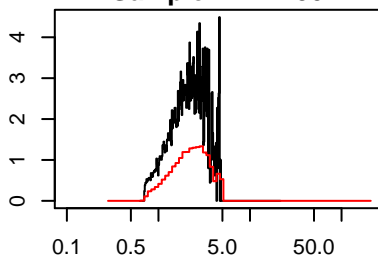

Sample 22222.50 cumulative

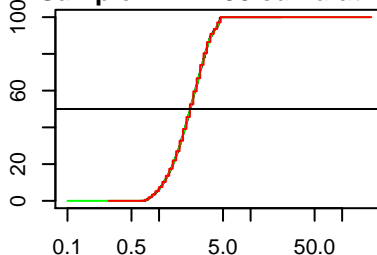

Sample statistics  
 Mass conserved = 1  
 Median(obs/new) = 2.19 / 2.27  
 1%(obs/new) = 0.75 / 0.73  
 5%(obs/new) = 0.94 / 0.95  
 25%(obs/new) = 1.55 / 1.61  
 75%(obs/new) = 2.98 / 2.94  
 95%(obs/new) = 4.27 / 4.14  
 99%(obs/new) = 4.64 / 4.91

Sample 22382.00

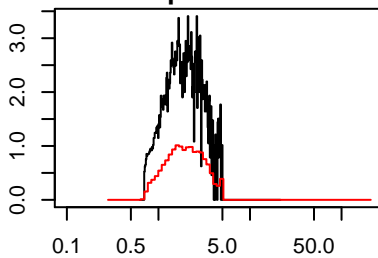

Sample 22382.00 cumulative

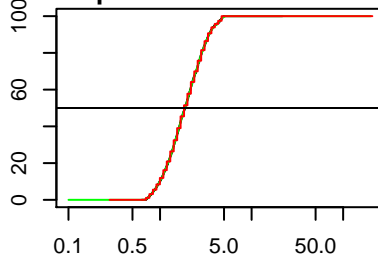

Sample statistics  
 Mass conserved = 1  
 Median(obs/new) = 1.86 / 1.91  
 1%(obs/new) = 0.73 / 0.73  
 5%(obs/new) = 0.86 / 0.87  
 25%(obs/new) = 1.33 / 1.35  
 75%(obs/new) = 2.66 / 2.7  
 95%(obs/new) = 3.93 / 4.14  
 99%(obs/new) = 4.77 / 4.91

Sample 22607.50

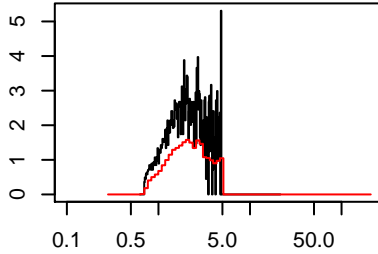

Sample 22607.50 cumulative

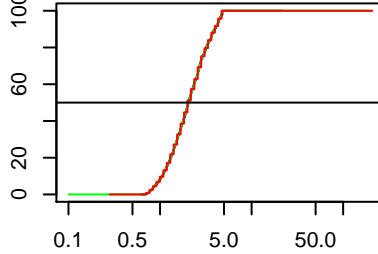

Sample statistics  
 Mass conserved = 1  
 Median(obs/new) = 2.05 / 2.08  
 1%(obs/new) = 0.74 / 0.73  
 5%(obs/new) = 0.89 / 0.87  
 25%(obs/new) = 1.43 / 1.47  
 75%(obs/new) = 2.94 / 2.94  
 95%(obs/new) = 4.39 / 4.51  
 99%(obs/new) = 4.84 / 4.91

Sample 23212.50

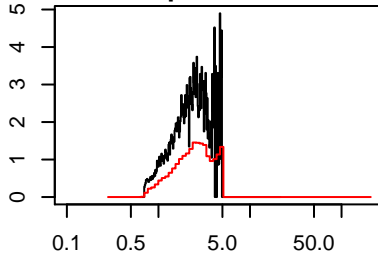

Sample 23212.50 cumulative

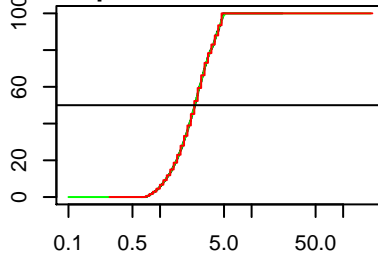

Sample statistics  
 Mass conserved = 1  
 Median(obs/new) = 2.42 / 2.47  
 1%(obs/new) = 0.75 / 0.73  
 5%(obs/new) = 0.97 / 0.95  
 25%(obs/new) = 1.66 / 1.61  
 75%(obs/new) = 3.28 / 3.2  
 95%(obs/new) = 4.64 / 4.51  
 99%(obs/new) = 4.84 / 4.91

Sample 23273.00

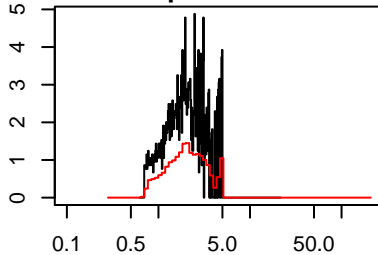

Sample 23273.00 cumulative

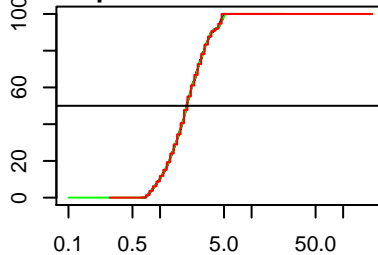

Sample statistics  
 Mass conserved = 1  
 Median(obs/new) = 1.96 / 1.91  
 1%(obs/new) = 0.72 / 0.73  
 5%(obs/new) = 0.84 / 0.87  
 25%(obs/new) = 1.37 / 1.35  
 75%(obs/new) = 2.78 / 2.7  
 95%(obs/new) = 4.51 / 4.51  
 99%(obs/new) = 4.9 / 4.91

Sample 23322.50

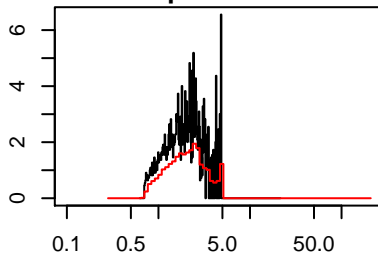

Sample 23322.50 cumulative

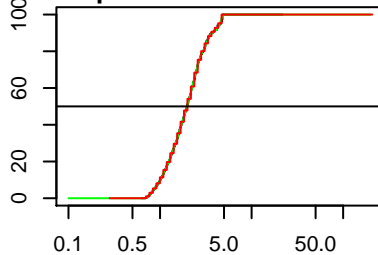

Sample statistics  
 Mass conserved = 1  
 Median(obs/new) = 1.96 / 1.91  
 1%(obs/new) = 0.73 / 0.73  
 5%(obs/new) = 0.87 / 0.87  
 25%(obs/new) = 1.37 / 1.35  
 75%(obs/new) = 2.66 / 2.7  
 95%(obs/new) = 4.58 / 4.51  
 99%(obs/new) = 4.84 / 4.91

Sample 23707.50

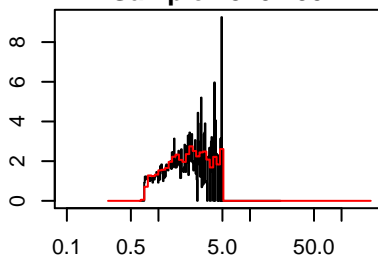

Sample 23707.50 cumulative

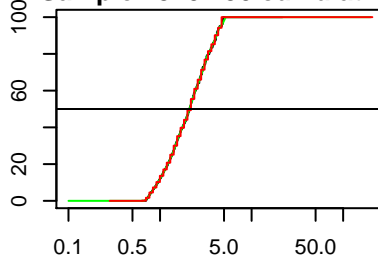

Sample statistics  
 Mass conserved = 1  
 Median(obs/new) = 2.11 / 2.08  
 1%(obs/new) = 0.71 / 0.73  
 5%(obs/new) = 0.81 / 0.8  
 25%(obs/new) = 1.35 / 1.35  
 75%(obs/new) = 3.1 / 3.2  
 95%(obs/new) = 4.58 / 4.51  
 99%(obs/new) = 4.9 / 4.91

Sample 24257.50

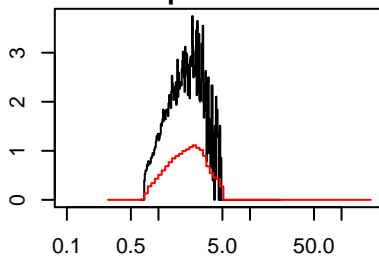

Sample 24257.50 cumulative

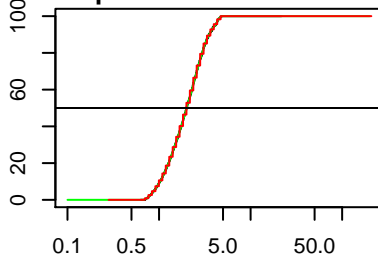

Sample statistics  
 Mass conserved = 1  
 Median(obs/new) = 1.99 / 2.08  
 1%(obs/new) = 0.74 / 0.73  
 5%(obs/new) = 0.88 / 0.87  
 25%(obs/new) = 1.39 / 1.35  
 75%(obs/new) = 2.74 / 2.7  
 95%(obs/new) = 4.04 / 4.14  
 99%(obs/new) = 4.64 / 4.51

Sample 24422.50

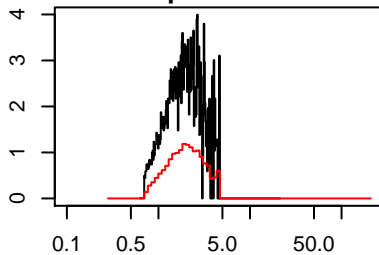

Sample 24422.50 cumulative

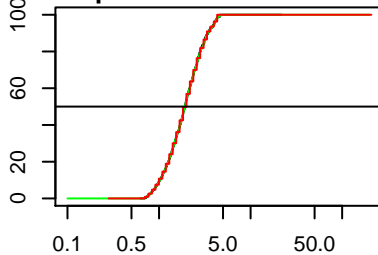

Sample statistics  
 Mass conserved = 1  
 Median(obs/new) = 1.91 / 1.91  
 1%(obs/new) = 0.74 / 0.73  
 5%(obs/new) = 0.88 / 0.87  
 25%(obs/new) = 1.37 / 1.35  
 75%(obs/new) = 2.63 / 2.7  
 95%(obs/new) = 3.93 / 4.14  
 99%(obs/new) = 4.39 / 4.51

Sample 24862.50

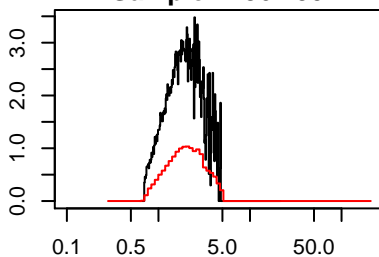

Sample 24862.50 cumulative

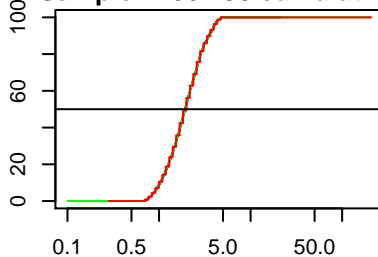

Sample statistics  
 Mass conserved = 1  
 Median(obs/new) = 1.91 / 1.91  
 1%(obs/new) = 0.74 / 0.73  
 5%(obs/new) = 0.89 / 0.87  
 25%(obs/new) = 1.37 / 1.35  
 75%(obs/new) = 2.66 / 2.7  
 95%(obs/new) = 3.98 / 4.14  
 99%(obs/new) = 4.51 / 4.51

Sample 25357.50

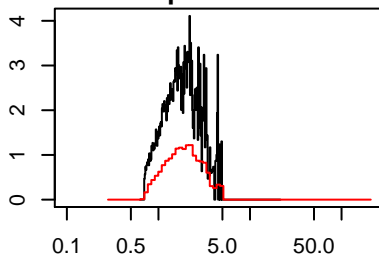

Sample 25357.50 cumulative

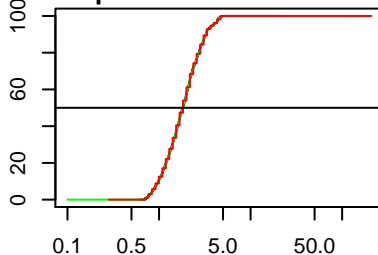

Sample statistics  
 Mass conserved = 1  
 Median(obs/new) = 1.81 / 1.75  
 1%(obs/new) = 0.73 / 0.73  
 5%(obs/new) = 0.86 / 0.87  
 25%(obs/new) = 1.3 / 1.35  
 75%(obs/new) = 2.52 / 2.47  
 95%(obs/new) = 3.87 / 3.8  
 99%(obs/new) = 4.45 / 4.51

Sample 25617.50

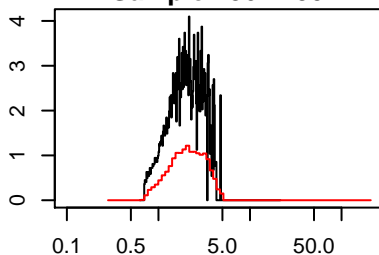

Sample 25617.50 cumulative

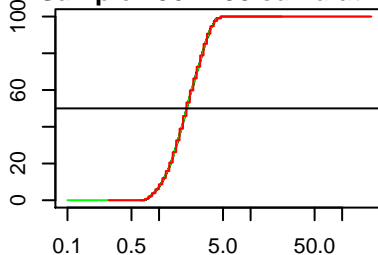

Sample statistics  
 Mass conserved = 1  
 Median(obs/new) = 1.99 / 2.08  
 1%(obs/new) = 0.75 / 0.73  
 5%(obs/new) = 0.92 / 0.95  
 25%(obs/new) = 1.45 / 1.47  
 75%(obs/new) = 2.78 / 2.7  
 95%(obs/new) = 3.87 / 3.8  
 99%(obs/new) = 4.27 / 4.51

Sample 25907.50

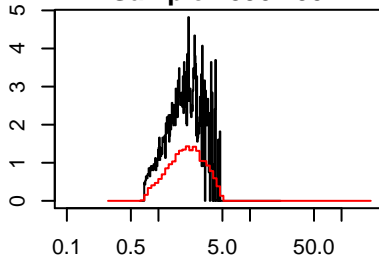

Sample 25907.50 cumulative

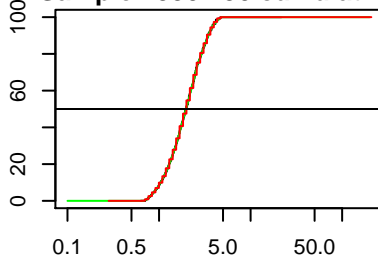

Sample statistics  
 Mass conserved = 1  
 Median(obs/new) = 1.96 / 1.91  
 1%(obs/new) = 0.74 / 0.73  
 5%(obs/new) = 0.89 / 0.87  
 25%(obs/new) = 1.41 / 1.35  
 75%(obs/new) = 2.66 / 2.7  
 95%(obs/new) = 3.82 / 3.8  
 99%(obs/new) = 4.51 / 4.51

Sample 26512.50

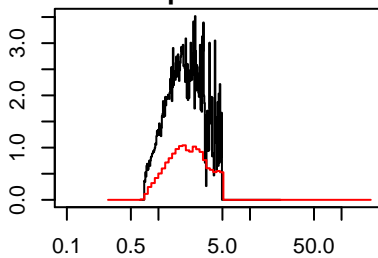

Sample 26512.50 cumulative

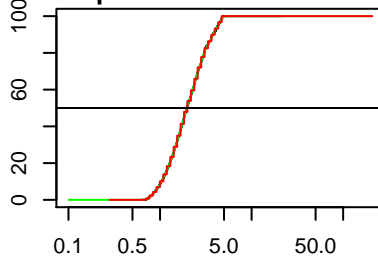

```
Sample statistics
Mass conserved = 1
Median(obs/new) = 1.96 / 1.91
1%(obs/new) = 0.74 / 0.73
5%(obs/new) = 0.9 / 0.87
25%(obs/new) = 1.39 / 1.35
75%(obs/new) = 2.82 / 2.94
95%(obs/new) = 4.33 / 4.51
99%(obs/new) = 4.77 / 4.91
```

Sample 26827.50

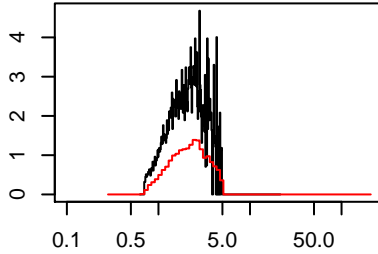

Sample 26827.50 cumulative

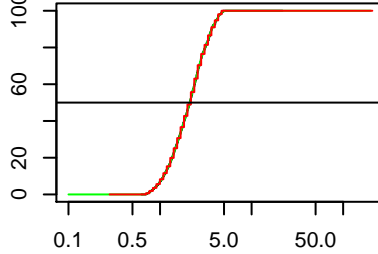

```
Sample statistics
Mass conserved = 1
Median(obs/new) = 2.11 / 2.08
1%(obs/new) = 0.75 / 0.73
5%(obs/new) = 0.93 / 0.95
25%(obs/new) = 1.47 / 1.47
75%(obs/new) = 2.86 / 2.94
95%(obs/new) = 4.15 / 4.14
99%(obs/new) = 4.7 / 4.51
```

Sample 27007.50

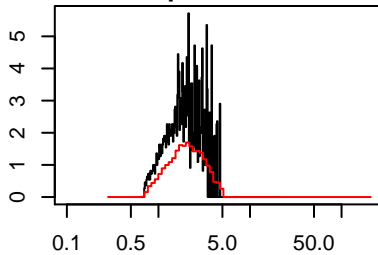

Sample 27007.50 cumulative

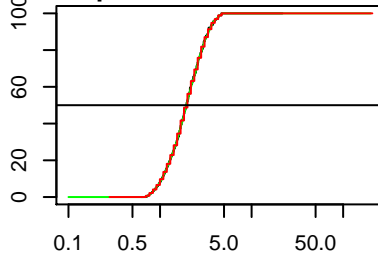

```
Sample statistics
Mass conserved = 1
Median(obs/new) = 1.94 / 1.91
1%(obs/new) = 0.75 / 0.73
5%(obs/new) = 0.9 / 0.87
25%(obs/new) = 1.41 / 1.35
75%(obs/new) = 2.63 / 2.7
95%(obs/new) = 3.87 / 3.8
99%(obs/new) = 4.39 / 4.51
```

Sample 27662.50

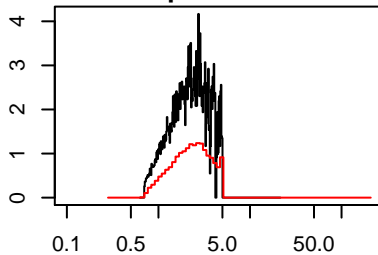

Sample 27662.50 cumulative

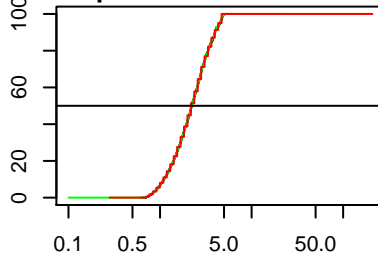

```
Sample statistics
Mass conserved = 1
Median(obs/new) = 2.23 / 2.27
1%(obs/new) = 0.75 / 0.73
5%(obs/new) = 0.94 / 0.95
25%(obs/new) = 1.53 / 1.47
75%(obs/new) = 3.1 / 3.2
95%(obs/new) = 4.51 / 4.51
99%(obs/new) = 4.84 / 4.91
```

Sample 27817.50

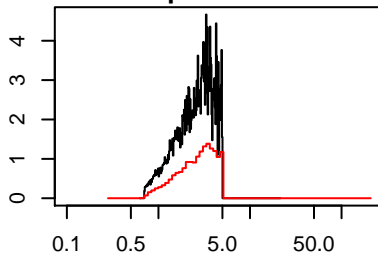

Sample 27817.50 cumulative

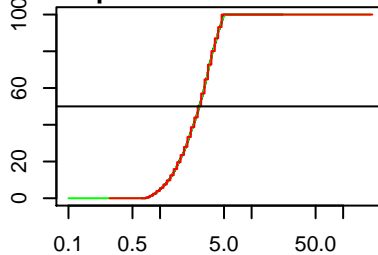

```
Sample statistics
Mass conserved = 1
Median(obs/new) = 2.7 / 2.7
1%(obs/new) = 0.78 / 0.8
5%(obs/new) = 1.01 / 1.04
25%(obs/new) = 1.81 / 1.75
75%(obs/new) = 3.57 / 3.49
95%(obs/new) = 4.64 / 4.51
99%(obs/new) = 4.9 / 4.91
```

Sample 28107.50

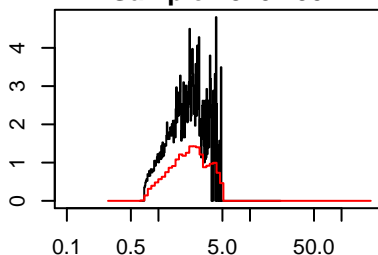

Sample 28107.50 cumulative

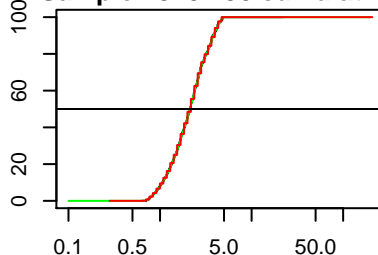

```
Sample statistics
Mass conserved = 1
Median(obs/new) = 2.13 / 2.08
1%(obs/new) = 0.74 / 0.73
5%(obs/new) = 0.9 / 0.87
25%(obs/new) = 1.47 / 1.47
75%(obs/new) = 2.94 / 2.94
95%(obs/new) = 4.27 / 4.14
99%(obs/new) = 4.7 / 4.91
```

Sample 28657.50

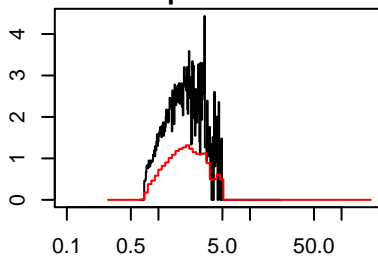

Sample 28657.50 cumulative

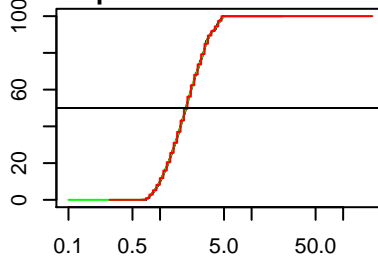

Sample statistics  
 Mass conserved = 1  
 Median(obs/new) = 1.91 / 1.91  
 1%(obs/new) = 0.74 / 0.73  
 5%(obs/new) = 0.87 / 0.87  
 25%(obs/new) = 1.33 / 1.35  
 75%(obs/new) = 2.74 / 2.7  
 95%(obs/new) = 4.21 / 4.14  
 99%(obs/new) = 4.7 / 4.91

Sample 29207.50

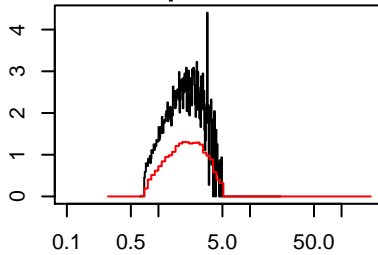

Sample 29207.50 cumulative

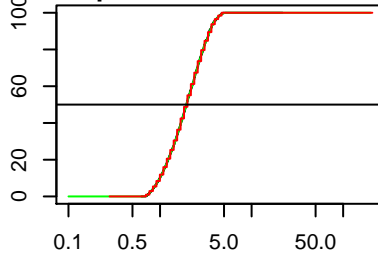

Sample statistics  
 Mass conserved = 1  
 Median(obs/new) = 1.94 / 1.91  
 1%(obs/new) = 0.73 / 0.73  
 5%(obs/new) = 0.87 / 0.87  
 25%(obs/new) = 1.33 / 1.35  
 75%(obs/new) = 2.74 / 2.7  
 95%(obs/new) = 3.87 / 3.8  
 99%(obs/new) = 4.58 / 4.51

Sample 29757.50

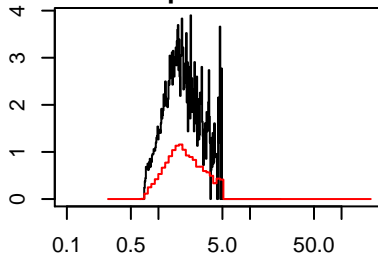

Sample 29757.50 cumulative

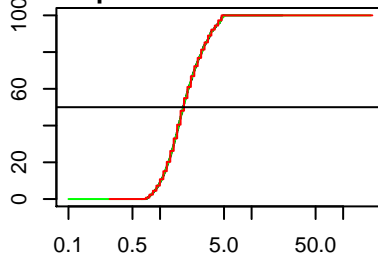

Sample statistics  
 Mass conserved = 1  
 Median(obs/new) = 1.78 / 1.75  
 1%(obs/new) = 0.74 / 0.73  
 5%(obs/new) = 0.89 / 0.87  
 25%(obs/new) = 1.33 / 1.35  
 75%(obs/new) = 2.59 / 2.7  
 95%(obs/new) = 4.21 / 4.14  
 99%(obs/new) = 4.7 / 4.91

Sample 29931.50

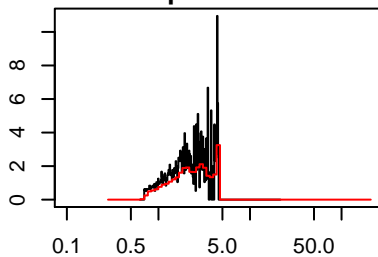

Sample 29931.50 cumulative

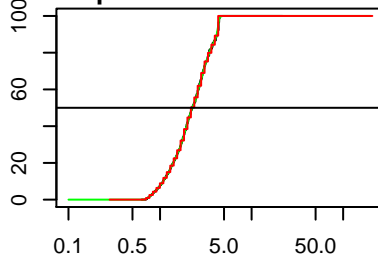

Sample statistics  
 Mass conserved = 1  
 Median(obs/new) = 2.26 / 2.27  
 1%(obs/new) = 0.73 / 0.73  
 5%(obs/new) = 0.9 / 0.87  
 25%(obs/new) = 1.55 / 1.61  
 75%(obs/new) = 3.19 / 3.2  
 95%(obs/new) = 4.39 / 4.51  
 99%(obs/new) = 4.45 / 4.51

Sample 30362.50

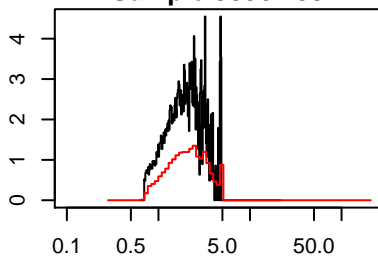

Sample 30362.50 cumulative

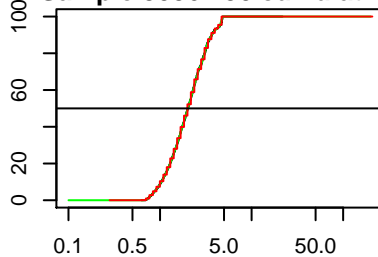

Sample statistics  
 Mass conserved = 1  
 Median(obs/new) = 2.02 / 2.08  
 1%(obs/new) = 0.75 / 0.73  
 5%(obs/new) = 0.88 / 0.87  
 25%(obs/new) = 1.41 / 1.35  
 75%(obs/new) = 2.86 / 2.94  
 95%(obs/new) = 4.51 / 4.51  
 99%(obs/new) = 4.77 / 4.91

Sample 30912.50

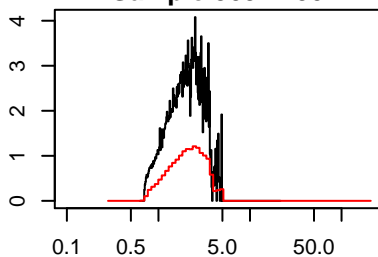

Sample 30912.50 cumulative

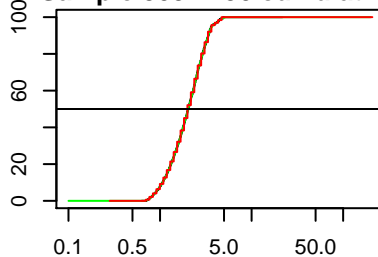

Sample statistics  
 Mass conserved = 1  
 Median(obs/new) = 2.02 / 2.08  
 1%(obs/new) = 0.75 / 0.73  
 5%(obs/new) = 0.9 / 0.87  
 25%(obs/new) = 1.43 / 1.47  
 75%(obs/new) = 2.74 / 2.7  
 95%(obs/new) = 3.67 / 3.8  
 99%(obs/new) = 4.58 / 4.51

Sample 31022.50

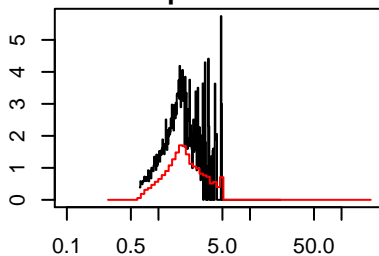

Sample 31022.50 cumulative

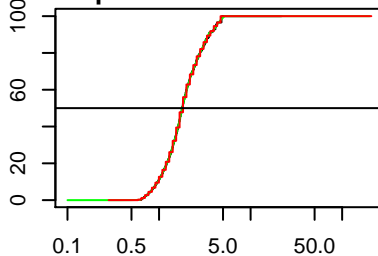

Sample statistics  
 Mass conserved = 1  
 Median(obs/new) = 1.78 / 1.75  
 1%(obs/new) = 0.67 / 0.67  
 5%(obs/new) = 0.82 / 0.8  
 25%(obs/new) = 1.33 / 1.35  
 75%(obs/new) = 2.56 / 2.47  
 95%(obs/new) = 4.21 / 4.14  
 99%(obs/new) = 4.84 / 4.91

Sample 31112.50

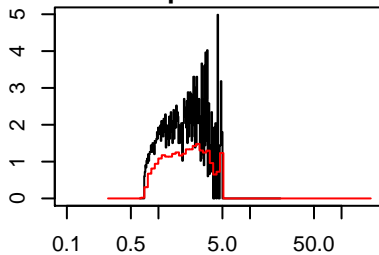

Sample 31112.50 cumulative

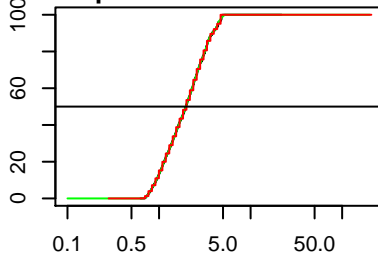

Sample statistics  
 Mass conserved = 1  
 Median(obs/new) = 1.96 / 1.91  
 1%(obs/new) = 0.72 / 0.73  
 5%(obs/new) = 0.83 / 0.8  
 25%(obs/new) = 1.24 / 1.24  
 75%(obs/new) = 2.94 / 2.94  
 95%(obs/new) = 4.45 / 4.51  
 99%(obs/new) = 4.9 / 4.91

Sample 31407.50

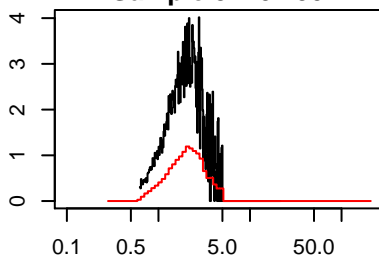

Sample 31407.50 cumulative

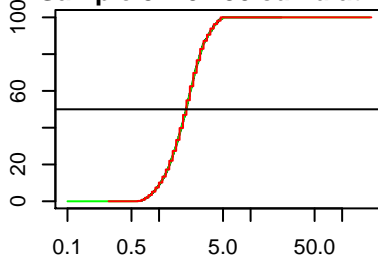

Sample statistics  
 Mass conserved = 1  
 Median(obs/new) = 1.96 / 1.91  
 1%(obs/new) = 0.68 / 0.67  
 5%(obs/new) = 0.87 / 0.87  
 25%(obs/new) = 1.43 / 1.47  
 75%(obs/new) = 2.63 / 2.7  
 95%(obs/new) = 3.93 / 3.8  
 99%(obs/new) = 4.7 / 4.51

Sample 31462.50

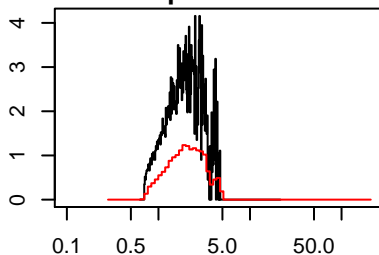

Sample 31462.50 cumulative

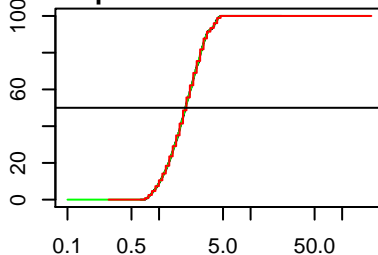

Sample statistics  
 Mass conserved = 1  
 Median(obs/new) = 1.94 / 1.91  
 1%(obs/new) = 0.74 / 0.73  
 5%(obs/new) = 0.88 / 0.87  
 25%(obs/new) = 1.39 / 1.35  
 75%(obs/new) = 2.7 / 2.7  
 95%(obs/new) = 3.98 / 4.14  
 99%(obs/new) = 4.45 / 4.51

Sample 31847.50

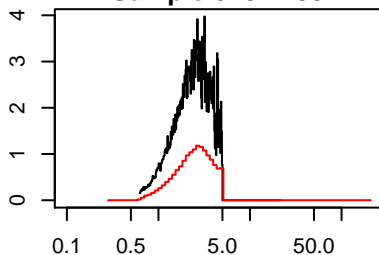

Sample 31847.50 cumulative

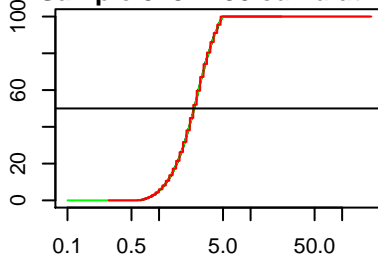

Sample statistics  
 Mass conserved = 1  
 Median(obs/new) = 2.42 / 2.47  
 1%(obs/new) = 0.72 / 0.73  
 5%(obs/new) = 1 / 0.95  
 25%(obs/new) = 1.71 / 1.75  
 75%(obs/new) = 3.24 / 3.2  
 95%(obs/new) = 4.39 / 4.51  
 99%(obs/new) = 4.84 / 4.91

Sample 31957.50

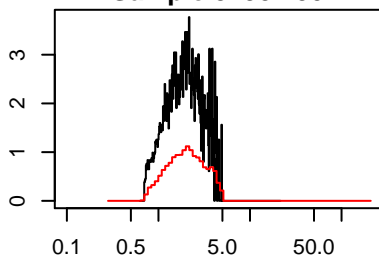

Sample 31957.50 cumulative

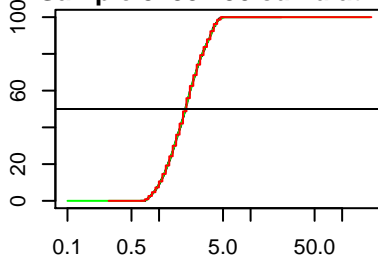

Sample statistics  
 Mass conserved = 1  
 Median(obs/new) = 1.94 / 1.91  
 1%(obs/new) = 0.74 / 0.73  
 5%(obs/new) = 0.88 / 0.87  
 25%(obs/new) = 1.37 / 1.35  
 75%(obs/new) = 2.7 / 2.7  
 95%(obs/new) = 3.98 / 4.14  
 99%(obs/new) = 4.51 / 4.51

Sample 32191.50

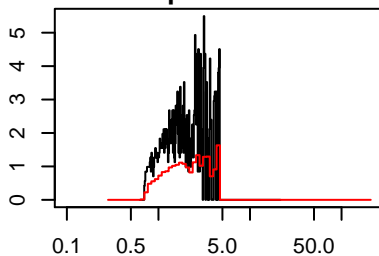

Sample 32191.50 cumulative

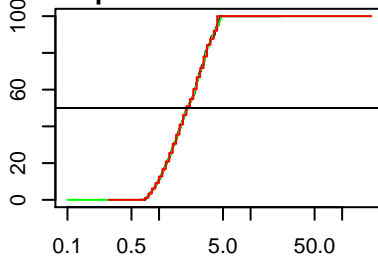

Sample statistics  
 Mass conserved = 1  
 Median(obs/new) = 2.05 / 2.08  
 1%(obs/new) = 0.73 / 0.73  
 5%(obs/new) = 0.84 / 0.87  
 25%(obs/new) = 1.33 / 1.35  
 75%(obs/new) = 3.1 / 3.2  
 95%(obs/new) = 4.39 / 4.14  
 99%(obs/new) = 4.58 / 4.51

Sample 32562.50

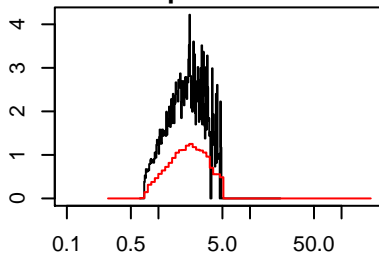

Sample 32562.50 cumulative

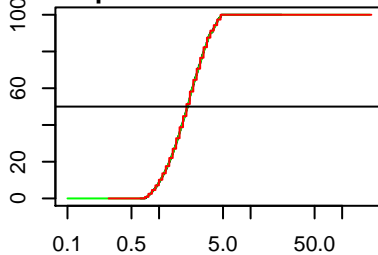

Sample statistics  
 Mass conserved = 1  
 Median(obs/new) = 2.05 / 2.08  
 1%(obs/new) = 0.74 / 0.73  
 5%(obs/new) = 0.89 / 0.87  
 25%(obs/new) = 1.43 / 1.47  
 75%(obs/new) = 2.86 / 2.94  
 95%(obs/new) = 4.21 / 4.14  
 99%(obs/new) = 4.64 / 4.91

Sample 33112.50

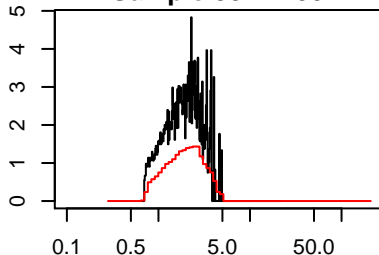

Sample 33112.50 cumulative

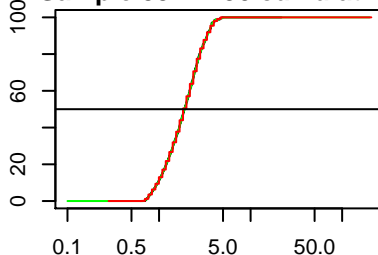

Sample statistics  
 Mass conserved = 1  
 Median(obs/new) = 1.88 / 1.91  
 1%(obs/new) = 0.73 / 0.73  
 5%(obs/new) = 0.84 / 0.87  
 25%(obs/new) = 1.31 / 1.35  
 75%(obs/new) = 2.59 / 2.7  
 95%(obs/new) = 3.72 / 3.8  
 99%(obs/new) = 4.15 / 4.51

Sample 33317.50

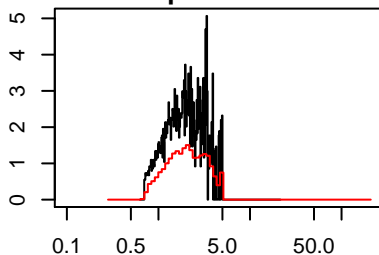

Sample 33317.50 cumulative

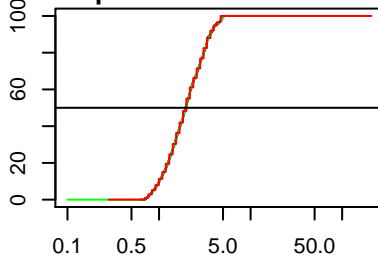

Sample statistics  
 Mass conserved = 1  
 Median(obs/new) = 1.96 / 1.91  
 1%(obs/new) = 0.73 / 0.73  
 5%(obs/new) = 0.87 / 0.87  
 25%(obs/new) = 1.35 / 1.35  
 75%(obs/new) = 2.82 / 2.94  
 95%(obs/new) = 4.1 / 4.14  
 99%(obs/new) = 4.9 / 4.91

Sample 33607.50

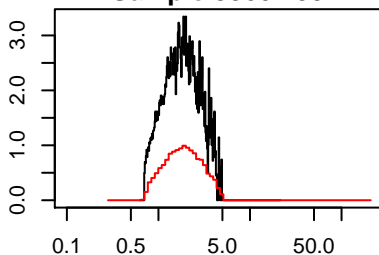

Sample 33607.50 cumulative

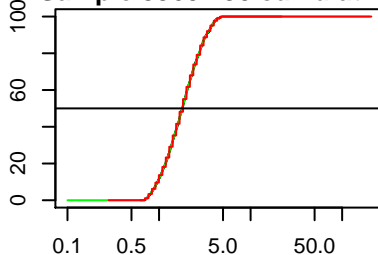

Sample statistics  
 Mass conserved = 1  
 Median(obs/new) = 1.78 / 1.75  
 1%(obs/new) = 0.73 / 0.73  
 5%(obs/new) = 0.84 / 0.87  
 25%(obs/new) = 1.28 / 1.24  
 75%(obs/new) = 2.52 / 2.47  
 95%(obs/new) = 3.77 / 3.8  
 99%(obs/new) = 4.33 / 4.51

Sample 33987.50

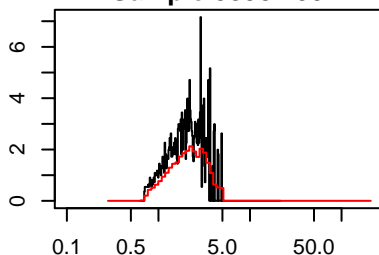

Sample 33987.50 cumulative

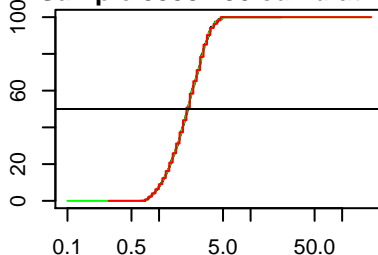

Sample statistics  
 Mass conserved = 1  
 Median(obs/new) = 2.08 / 2.08  
 1%(obs/new) = 0.74 / 0.73  
 5%(obs/new) = 0.92 / 0.87  
 25%(obs/new) = 1.45 / 1.47  
 75%(obs/new) = 2.82 / 2.94  
 95%(obs/new) = 3.93 / 3.8  
 99%(obs/new) = 4.51 / 4.51

Sample 34322.50

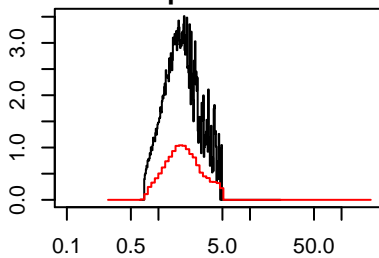

Sample 34322.50 cumulative

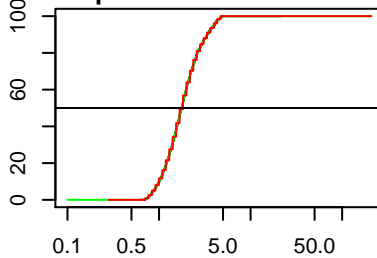

Sample statistics  
 Mass conserved = 1  
 Median(obs/new) = 1.76 / 1.75  
 1%(obs/new) = 0.74 / 0.73  
 5%(obs/new) = 0.88 / 0.87  
 25%(obs/new) = 1.3 / 1.35  
 75%(obs/new) = 2.45 / 2.47  
 95%(obs/new) = 4.04 / 4.14  
 99%(obs/new) = 4.64 / 4.51

Sample 34707.50

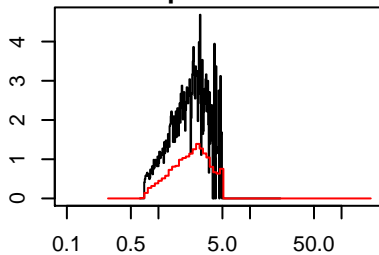

Sample 34707.50 cumulative

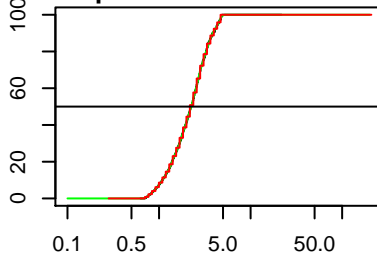

Sample statistics  
 Mass conserved = 1  
 Median(obs/new) = 2.26 / 2.27  
 1%(obs/new) = 0.74 / 0.73  
 5%(obs/new) = 0.92 / 0.87  
 25%(obs/new) = 1.53 / 1.47  
 75%(obs/new) = 3.02 / 2.94  
 95%(obs/new) = 4.39 / 4.51  
 99%(obs/new) = 4.77 / 4.91

Sample 35257.50

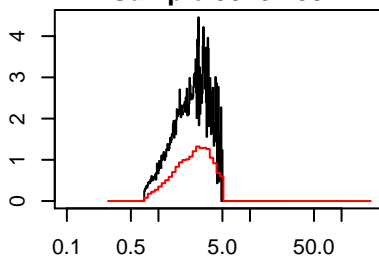

Sample 35257.50 cumulative

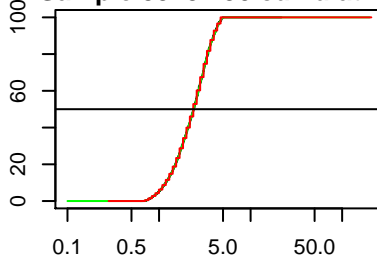

Sample statistics  
 Mass conserved = 1  
 Median(obs/new) = 2.39 / 2.47  
 1%(obs/new) = 0.78 / 0.8  
 5%(obs/new) = 1 / 0.95  
 25%(obs/new) = 1.64 / 1.61  
 75%(obs/new) = 3.19 / 3.2  
 95%(obs/new) = 4.33 / 4.51  
 99%(obs/new) = 4.77 / 4.91

Sample 35532.50

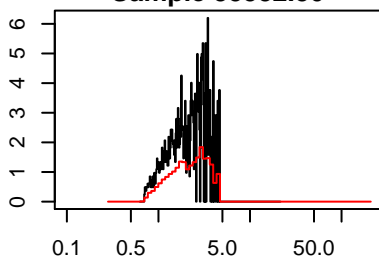

Sample 35532.50 cumulative

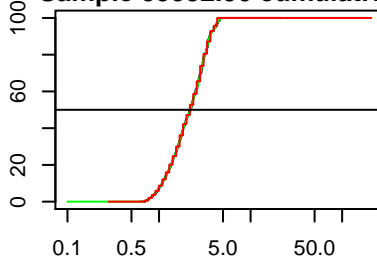

Sample statistics  
 Mass conserved = 1  
 Median(obs/new) = 2.23 / 2.27  
 1%(obs/new) = 0.75 / 0.73  
 5%(obs/new) = 0.93 / 0.95  
 25%(obs/new) = 1.47 / 1.47  
 75%(obs/new) = 2.98 / 2.94  
 95%(obs/new) = 4.04 / 4.14  
 99%(obs/new) = 4.45 / 4.51

Sample 35642.50

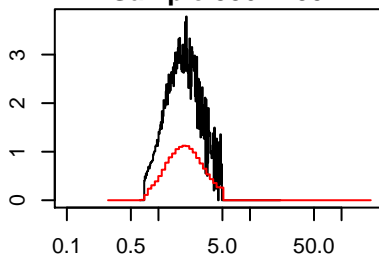

Sample 35642.50 cumulative

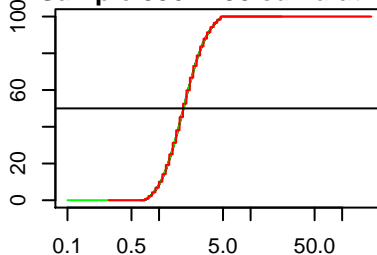

Sample statistics  
 Mass conserved = 1  
 Median(obs/new) = 1.86 / 1.91  
 1%(obs/new) = 0.74 / 0.73  
 5%(obs/new) = 0.9 / 0.87  
 25%(obs/new) = 1.35 / 1.35  
 75%(obs/new) = 2.52 / 2.47  
 95%(obs/new) = 3.93 / 3.8  
 99%(obs/new) = 4.7 / 4.51

Sample 35807.50

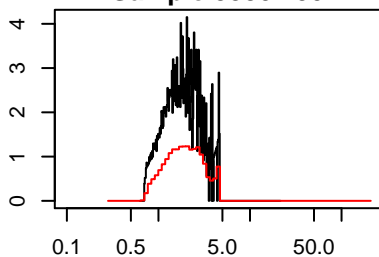

Sample 35807.50 cumulative

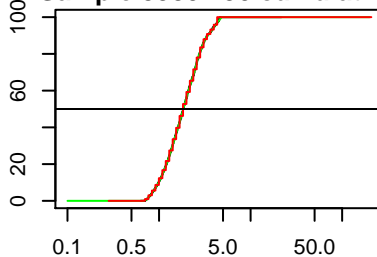

Sample statistics  
 Mass conserved = 1  
 Median(obs/new) = 1.83 / 1.91  
 1%(obs/new) = 0.73 / 0.73  
 5%(obs/new) = 0.86 / 0.87  
 25%(obs/new) = 1.31 / 1.35  
 75%(obs/new) = 2.59 / 2.7  
 95%(obs/new) = 4.04 / 4.14  
 99%(obs/new) = 4.58 / 4.51



Sample 36082.50

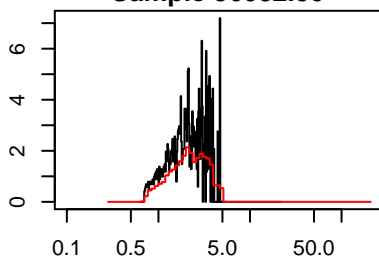

Sample 36082.50 cumulative

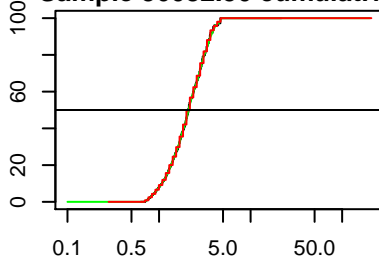

Sample statistics  
 Mass conserved = 1  
 Median(obs/new) = 2.11 / 2.08  
 1%(obs/new) = 0.74 / 0.73  
 5%(obs/new) = 0.9 / 0.87  
 25%(obs/new) = 1.49 / 1.47  
 75%(obs/new) = 2.94 / 2.94  
 95%(obs/new) = 3.93 / 4.14  
 99%(obs/new) = 4.7 / 4.51

Sample 36192.50

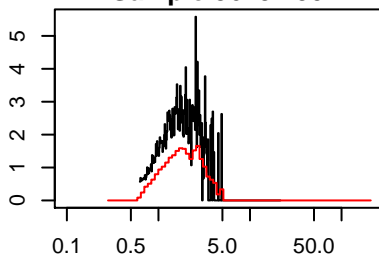

Sample 36192.50 cumulative

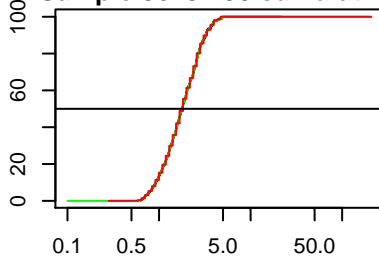

Sample statistics  
 Mass conserved = 1  
 Median(obs/new) = 1.78 / 1.75  
 1%(obs/new) = 0.66 / 0.67  
 5%(obs/new) = 0.8 / 0.8  
 25%(obs/new) = 1.26 / 1.24  
 75%(obs/new) = 2.56 / 2.47  
 95%(obs/new) = 3.77 / 3.8  
 99%(obs/new) = 4.51 / 4.51

Sample 36302.50

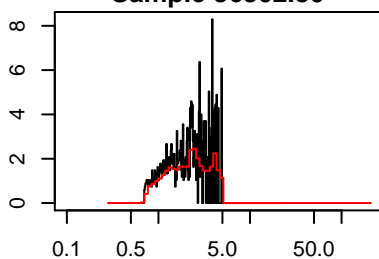

Sample 36302.50 cumulative

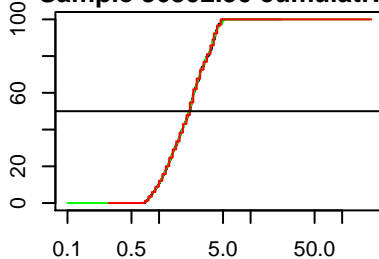

Sample statistics  
 Mass conserved = 1  
 Median(obs/new) = 2.16 / 2.08  
 1%(obs/new) = 0.72 / 0.73  
 5%(obs/new) = 0.84 / 0.87  
 25%(obs/new) = 1.37 / 1.35  
 75%(obs/new) = 3.1 / 3.2  
 95%(obs/new) = 4.39 / 4.51  
 99%(obs/new) = 4.9 / 4.91

5/25/50/75/95 percentiles

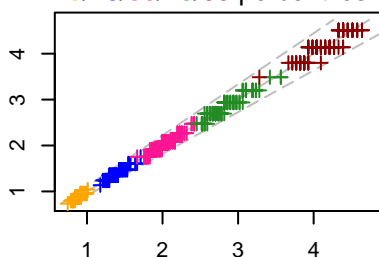

EDC percentiles

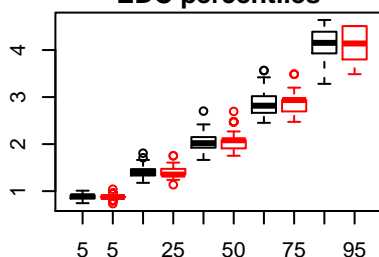

Site statistics  
 Percentiles Pearson's corr. = 0.911  
 Mean normalized bias = 0
