# Supplementary material for: Twelve thousand years of dust: the Holocene global dust cycle constrained by natural archives
Source: Copernicus journal article supplement (doi:10.5194/cp-11-869-2015), 2015-06-11
Supplement: Supplementary file 37 [file cp-11-869-2015-supplement.zip]

Weinan

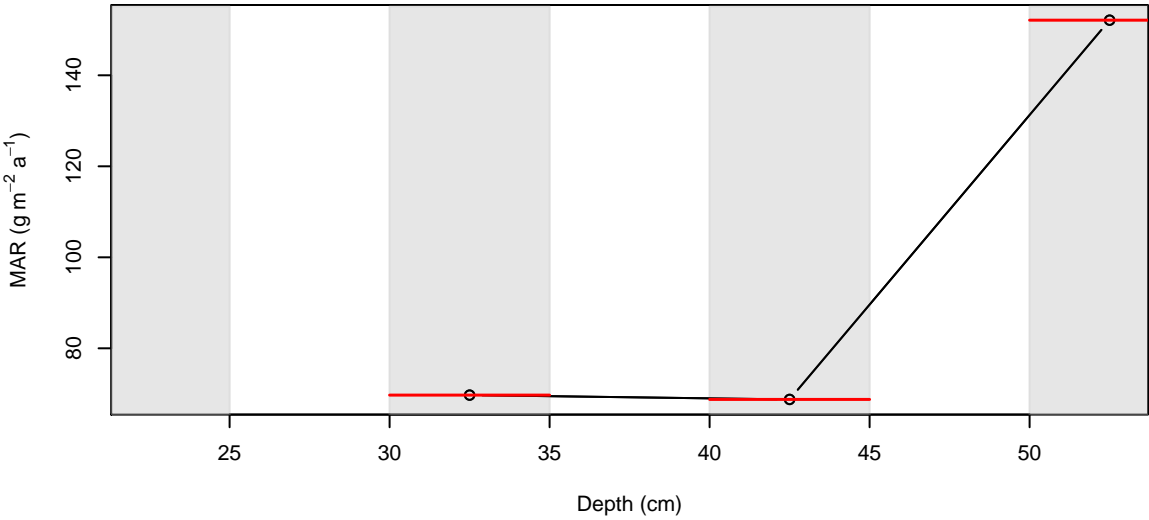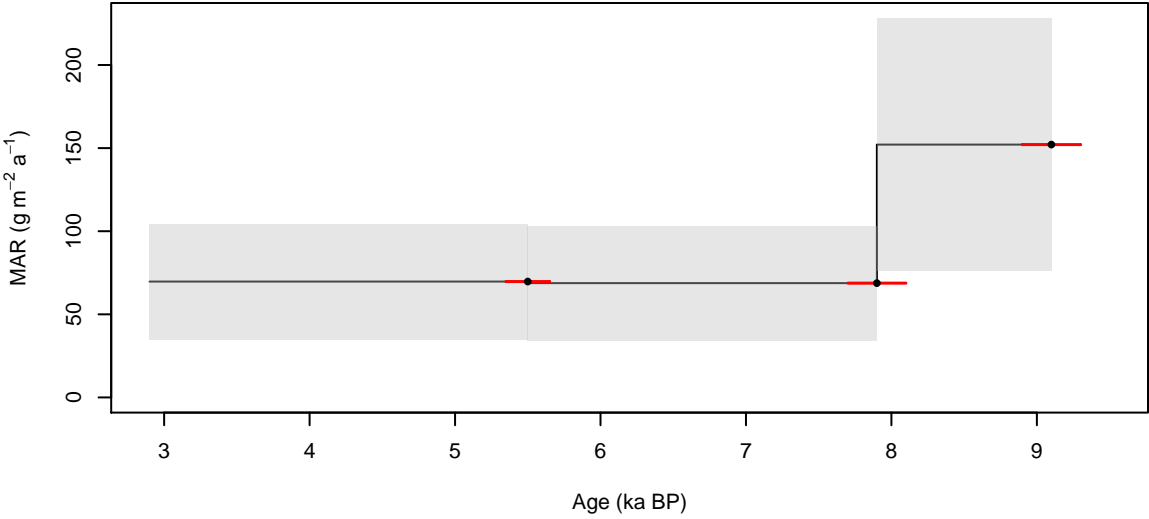

Weinan  
Reference: Kang et al., 2013  
Depth: OSL ages from depth interval few cm thick. Provided OSL depths are center,  
and the thickness of the sample used for analysis is 5 cm, depths reported as top  
Age: OSL ages. Ages are bottom ages for the sections.  
SBMAR: LSR\*DBD  
SBMAR err: From LSR and DBD  
DBD: Measured  
DBD err: Assume 5%  
EC: Assume it is 1, organic content negligible (Derbyshire, 1982)  
Size: Malvern 2000 laser counter after removal of organic matter and carbonate
