# Supplementary material for: Twelve thousand years of dust: the Holocene global dust cycle constrained by natural archives
Source: Copernicus journal article supplement (doi:10.5194/cp-11-869-2015), 2015-06-11
Supplement: Supplementary file 38 [file cp-11-869-2015-supplement.zip]

**Sample 1.5**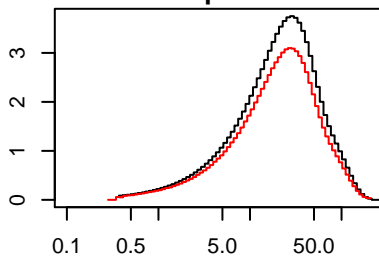**Sample 1.5 cumulative**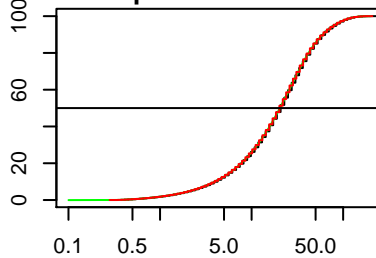

Sample statistics  
 Mass conserved = 1  
 Median(obs/new) = 21.21 / 21.01  
 1%(obs/new) = 0.74 / 0.73  
 5%(obs/new) = 2.06 / 2.08  
 25%(obs/new) = 9.16 / 9.74  
 75%(obs/new) = 37.12 / 38.18  
 95%(obs/new) = 78.28 / 82.26  
 99%(obs/new) = 124.77 / 126

**Sample 4.5**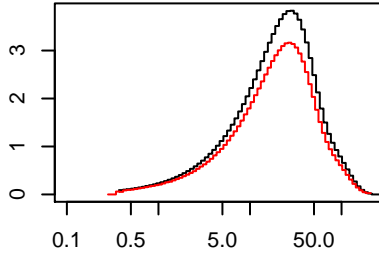**Sample 4.5 cumulative**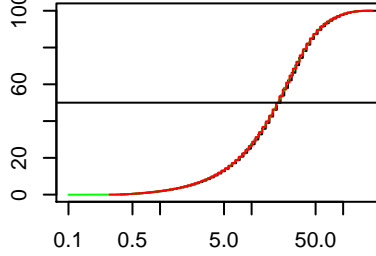

Sample statistics  
 Mass conserved = 1  
 Median(obs/new) = 19.32 / 19.29  
 1%(obs/new) = 0.68 / 0.67  
 5%(obs/new) = 2.06 / 2.08  
 25%(obs/new) = 9.16 / 8.94  
 75%(obs/new) = 33.82 / 35.05  
 95%(obs/new) = 71.31 / 75.53  
 99%(obs/new) = 113.7 / 115.7

**Sample 10.5**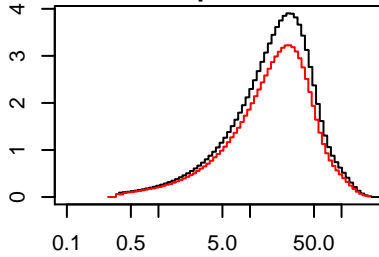**Sample 10.5 cumulative**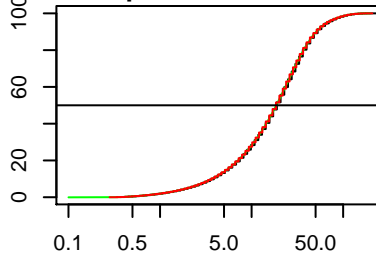

Sample statistics  
 Mass conserved = 1  
 Median(obs/new) = 19.32 / 19.29  
 1%(obs/new) = 0.68 / 0.67  
 5%(obs/new) = 2.06 / 2.08  
 25%(obs/new) = 9.16 / 8.94  
 75%(obs/new) = 33.82 / 32.19  
 95%(obs/new) = 64.96 / 69.36  
 99%(obs/new) = 113.7 / 106.24

**Sample 14.5**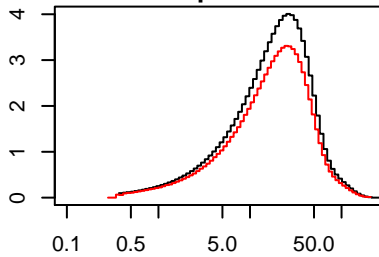**Sample 14.5 cumulative**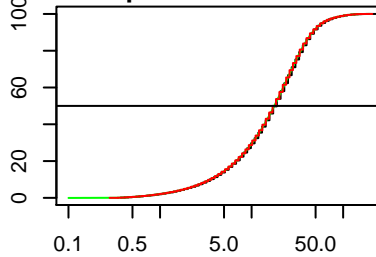

Sample statistics  
 Mass conserved = 1  
 Median(obs/new) = 17.6 / 17.71  
 1%(obs/new) = 0.68 / 0.67  
 5%(obs/new) = 1.88 / 1.91  
 25%(obs/new) = 8.35 / 8.21  
 75%(obs/new) = 30.8 / 29.56  
 95%(obs/new) = 59.17 / 58.48  
 99%(obs/new) = 103.56 / 97.56

**Sample 20.5**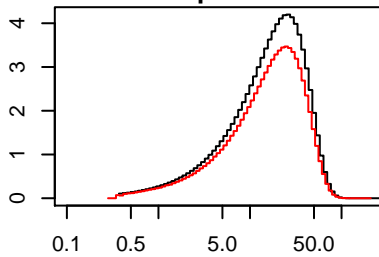**Sample 20.5 cumulative**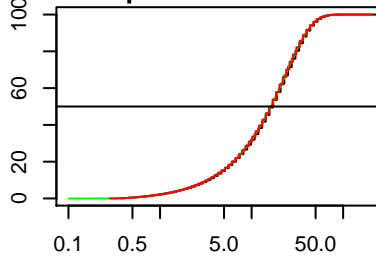

Sample statistics  
 Mass conserved = 1  
 Median(obs/new) = 16.04 / 16.26  
 1%(obs/new) = 0.68 / 0.67  
 5%(obs/new) = 1.88 / 1.75  
 25%(obs/new) = 7.61 / 7.54  
 75%(obs/new) = 28.06 / 27.14  
 95%(obs/new) = 44.74 / 45.28  
 99%(obs/new) = 59.17 / 63.69

**Sample 25.5**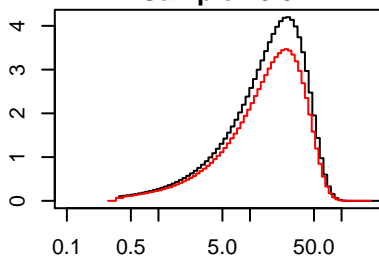**Sample 25.5 cumulative**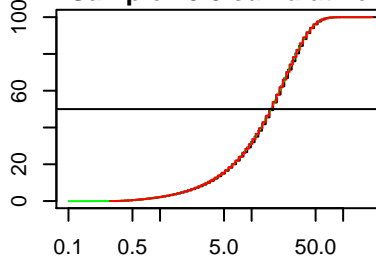

Sample statistics  
 Mass conserved = 1  
 Median(obs/new) = 16.04 / 16.26  
 1%(obs/new) = 0.68 / 0.67  
 5%(obs/new) = 1.88 / 1.75  
 25%(obs/new) = 7.61 / 7.54  
 75%(obs/new) = 28.06 / 27.14  
 95%(obs/new) = 44.74 / 45.28  
 99%(obs/new) = 59.17 / 63.69

Sample 30.5

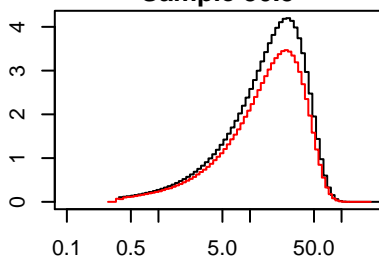

Sample 30.5 cumulative

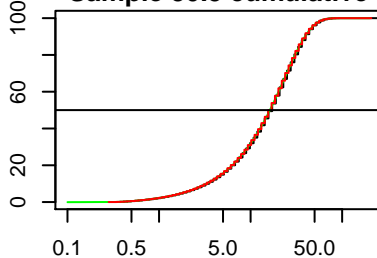

Sample statistics  
 Mass conserved = 1  
 Median(obs/new) = 16.04 / 16.26  
 1%(obs/new) = 0.68 / 0.67  
 5%(obs/new) = 1.88 / 1.75  
 25%(obs/new) = 7.61 / 7.54  
 75%(obs/new) = 28.06 / 27.14  
 95%(obs/new) = 44.74 / 45.28  
 99%(obs/new) = 59.17 / 63.69

Sample 35.5

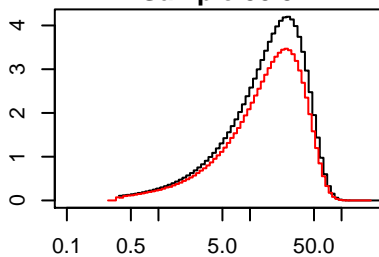

Sample 35.5 cumulative

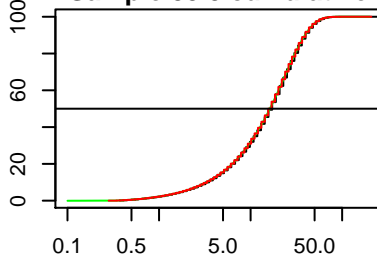

Sample statistics  
 Mass conserved = 1  
 Median(obs/new) = 16.04 / 16.26  
 1%(obs/new) = 0.68 / 0.67  
 5%(obs/new) = 1.88 / 1.75  
 25%(obs/new) = 7.61 / 7.54  
 75%(obs/new) = 28.06 / 27.14  
 95%(obs/new) = 44.74 / 45.28  
 99%(obs/new) = 59.17 / 63.69

Sample 40.5

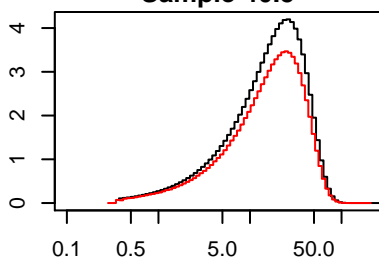

Sample 40.5 cumulative

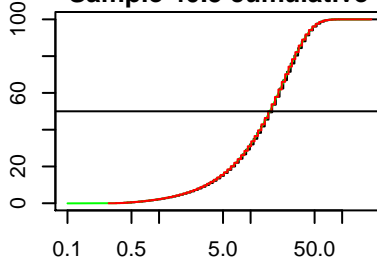

Sample statistics  
 Mass conserved = 1  
 Median(obs/new) = 16.04 / 16.26  
 1%(obs/new) = 0.68 / 0.67  
 5%(obs/new) = 1.88 / 1.75  
 25%(obs/new) = 7.61 / 7.54  
 75%(obs/new) = 28.06 / 27.14  
 95%(obs/new) = 44.74 / 45.28  
 99%(obs/new) = 59.17 / 63.69

Sample 45.5

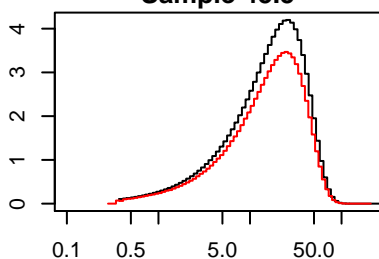

Sample 45.5 cumulative

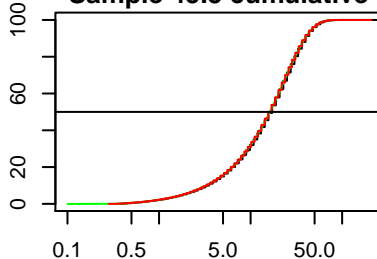

Sample statistics  
 Mass conserved = 1  
 Median(obs/new) = 16.04 / 16.26  
 1%(obs/new) = 0.68 / 0.67  
 5%(obs/new) = 1.88 / 1.75  
 25%(obs/new) = 7.61 / 7.54  
 75%(obs/new) = 28.06 / 27.14  
 95%(obs/new) = 44.74 / 45.28  
 99%(obs/new) = 59.17 / 63.69

Sample 50.5

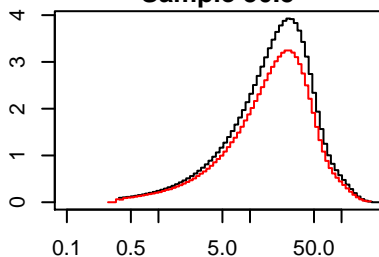

Sample 50.5 cumulative

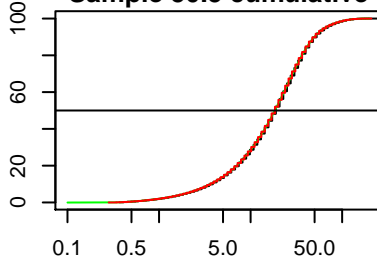

Sample statistics  
 Mass conserved = 1  
 Median(obs/new) = 17.6 / 17.71  
 1%(obs/new) = 0.68 / 0.67  
 5%(obs/new) = 2.06 / 2.08  
 25%(obs/new) = 9.16 / 8.94  
 75%(obs/new) = 30.8 / 32.19  
 95%(obs/new) = 64.96 / 63.69  
 99%(obs/new) = 103.56 / 106.24

Sample 55.5

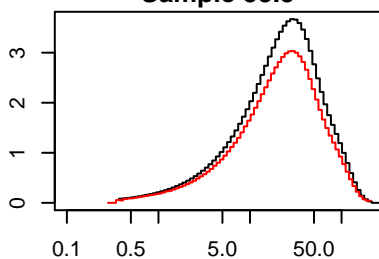

Sample 55.5 cumulative

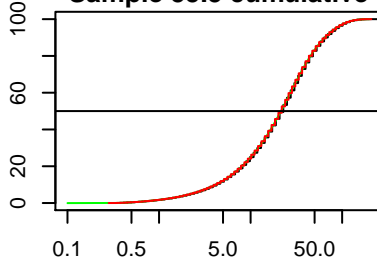

Sample statistics  
 Mass conserved = 1  
 Median(obs/new) = 21.21 / 21.01  
 1%(obs/new) = 0.74 / 0.73  
 5%(obs/new) = 2.26 / 2.27  
 25%(obs/new) = 10.06 / 9.74  
 75%(obs/new) = 40.75 / 38.18  
 95%(obs/new) = 85.94 / 82.26  
 99%(obs/new) = 124.77 / 126

Sample 60.5

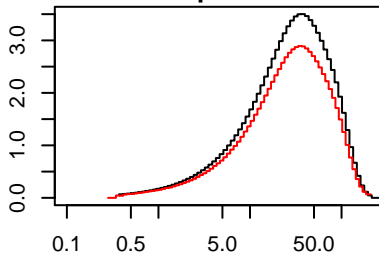

Sample 60.5 cumulative

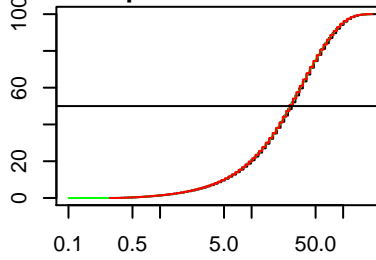

Sample statistics  
 Mass conserved = 1  
 Median(obs/new) = 25.56 / 27.14  
 1%(obs/new) = 0.81 / 0.8  
 5%(obs/new) = 2.73 / 2.7  
 25%(obs/new) = 12.12 / 12.59  
 75%(obs/new) = 49.11 / 49.31  
 95%(obs/new) = 94.34 / 97.56  
 99%(obs/new) = 136.97 / 137.21

Sample 65.5

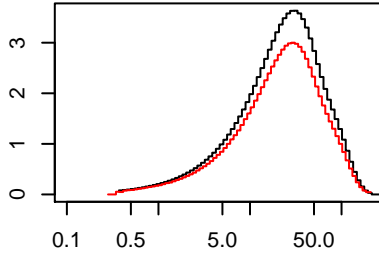

Sample 65.5 cumulative

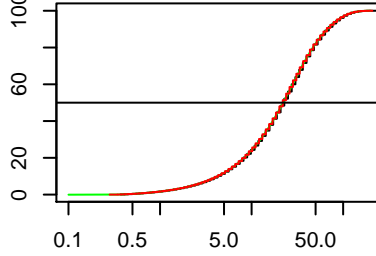

Sample statistics  
 Mass conserved = 1  
 Median(obs/new) = 21.21 / 22.88  
 1%(obs/new) = 0.74 / 0.73  
 5%(obs/new) = 2.26 / 2.27  
 25%(obs/new) = 10.06 / 10.61  
 75%(obs/new) = 40.75 / 41.58  
 95%(obs/new) = 85.94 / 89.58  
 99%(obs/new) = 124.77 / 126

5/25/50/75/95 percentiles

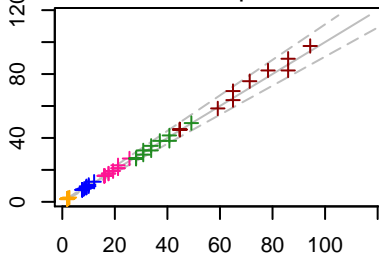

OC437-07-GC49 percentiles

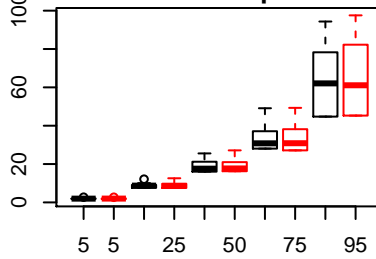

Site statistics  
 Percentiles Pearson's corr. = 0.993  
 Mean normalized bias = 0
