# Supplementary material for: Twelve thousand years of dust: the Holocene global dust cycle constrained by natural archives
Source: Copernicus journal article supplement (doi:10.5194/cp-11-869-2015), 2015-06-11
Supplement: Supplementary file 39 [file cp-11-869-2015-supplement.zip]

Sample 20

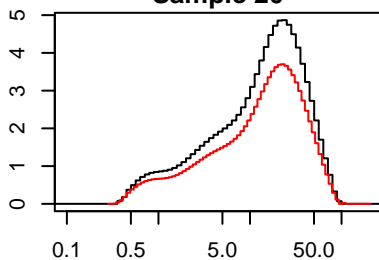

Sample 20 cumulative

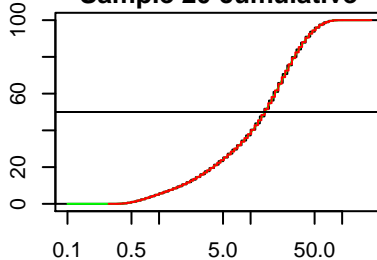

Sample statistics  
 Mass conserved = 1  
 Median(obs/new) = 15.02 / 14.93  
 1%(obs/new) = 0.53 / 0.52  
 5%(obs/new) = 0.95 / 0.95  
 25%(obs/new) = 5.33 / 5.35  
 75%(obs/new) = 26.71 / 27.14  
 95%(obs/new) = 53.3 / 49.31  
 99%(obs/new) = 67.1 / 69.36

Sample 30

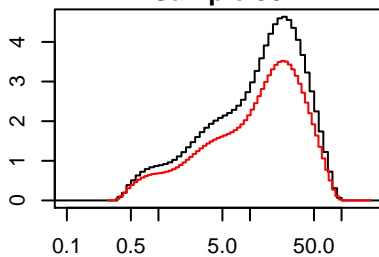

Sample 30 cumulative

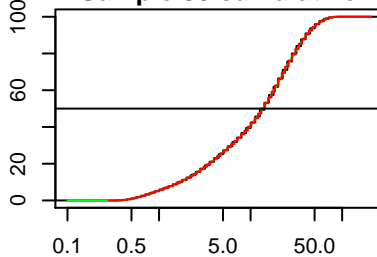

Sample statistics  
 Mass conserved = 1  
 Median(obs/new) = 13.39 / 13.71  
 1%(obs/new) = 0.53 / 0.52  
 5%(obs/new) = 0.95 / 0.95  
 25%(obs/new) = 4.75 / 4.91  
 75%(obs/new) = 26.71 / 27.14  
 95%(obs/new) = 53.3 / 49.31  
 99%(obs/new) = 67.1 / 69.36

Sample 40

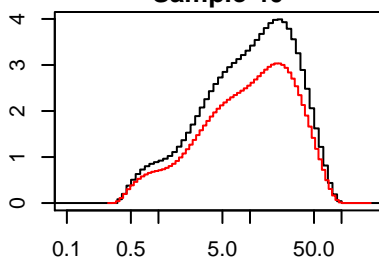

Sample 40 cumulative

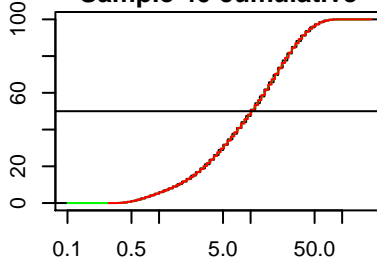

Sample statistics  
 Mass conserved = 1  
 Median(obs/new) = 10.64 / 10.61  
 1%(obs/new) = 0.53 / 0.52  
 5%(obs/new) = 0.95 / 0.95  
 25%(obs/new) = 4.23 / 4.14  
 75%(obs/new) = 21.22 / 22.88  
 95%(obs/new) = 47.51 / 45.28  
 99%(obs/new) = 67.1 / 63.69

Sample 50

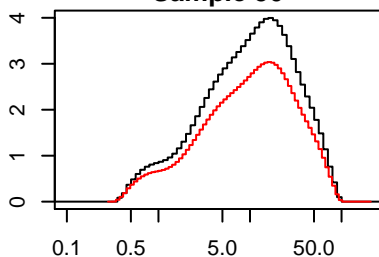

Sample 50 cumulative

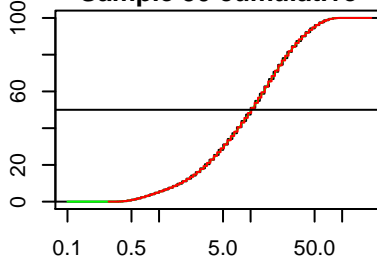

Sample statistics  
 Mass conserved = 1  
 Median(obs/new) = 10.64 / 10.61  
 1%(obs/new) = 0.53 / 0.52  
 5%(obs/new) = 0.95 / 0.95  
 25%(obs/new) = 4.23 / 4.14  
 75%(obs/new) = 21.22 / 21.01  
 95%(obs/new) = 47.51 / 49.31  
 99%(obs/new) = 67.1 / 69.36

5/25/50/75/95 percentiles

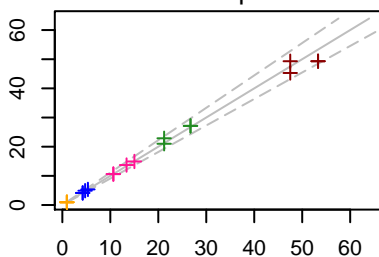

Weinan percentiles

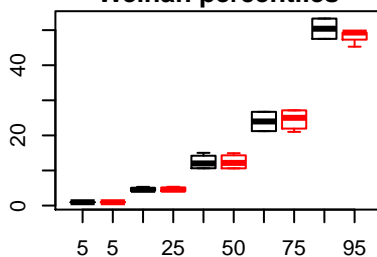

Site statistics  
 Percentiles Pearson's corr. = 0.577  
 Mean normalized bias = 0
