# Supplementary material for: Twelve thousand years of dust: the Holocene global dust cycle constrained by natural archives
Source: Copernicus journal article supplement (doi:10.5194/cp-11-869-2015), 2015-06-11
Supplement: Supplementary file 40 [file cp-11-869-2015-supplement.zip]

## V22-182

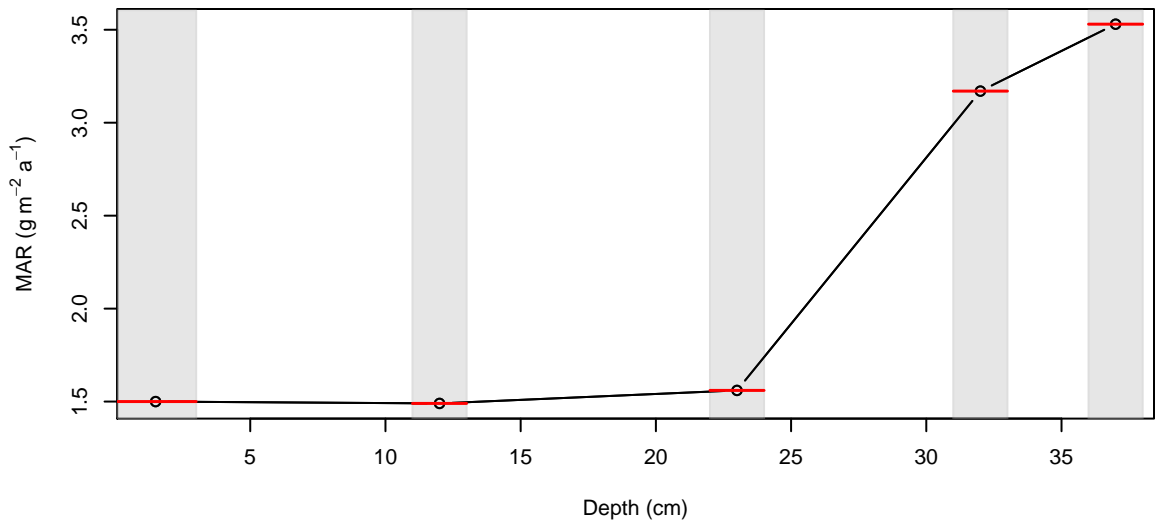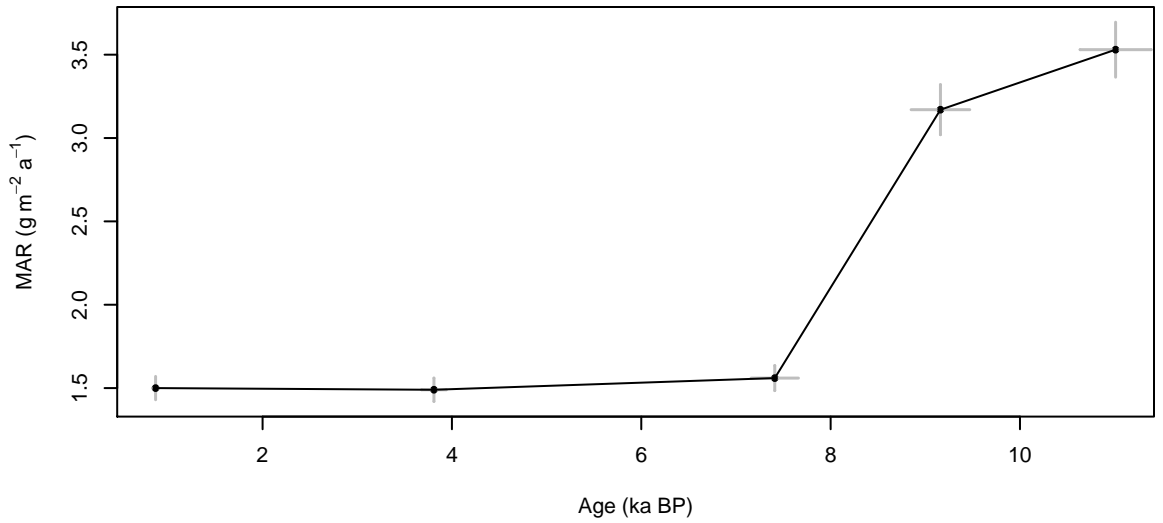

V22-182

Reference: Bradtmiller et al. 2007

Depth: Depth intervals NOT specified in paper: assume 2cm

Age: Assuming age is center. Age is total carbonates  $^{14}\text{C}$ , corrected for  $\delta^{13}\text{C}$ -400 years (Mix & Ruddiman, 1985)

Age error: assume 6.8% (1 sigma)

SBMAR:  $^{230}\text{Th}$

SBMAR error: assume 5% (1 sigma)

EC:  $^{232}\text{Th}$ -based dust concentration (10.0 ppm  $^{230}\text{Th}$  in dust;  $1/0.242530074 \text{ dpm} \rightarrow \text{ppm}$ )

EC error: assume 15% (1 sigma). Includes  $^{232}\text{Th}$  analytical error and error in  $^{232}\text{Th}$  as dust proxy
