# Supplementary material for: Twelve thousand years of dust: the Holocene global dust cycle constrained by natural archives
Source: Copernicus journal article supplement (doi:10.5194/cp-11-869-2015), 2015-06-11
Supplement: Supplementary file 42 [file cp-11-869-2015-supplement.zip]

Sample 0.5

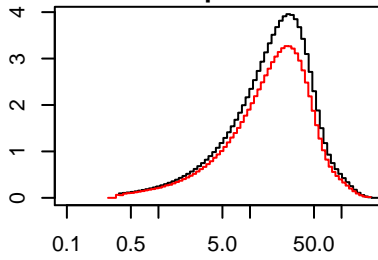

Sample 0.5 cumulative

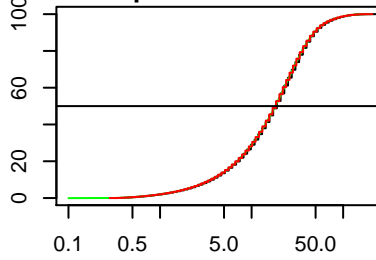

Sample statistics  
 Mass conserved = 1  
 Median(obs/new) = 17.6 / 17.71  
 1%(obs/new) = 0.68 / 0.67  
 5%(obs/new) = 2.06 / 1.91  
 25%(obs/new) = 8.35 / 8.94  
 75%(obs/new) = 30.8 / 32.19  
 95%(obs/new) = 64.96 / 63.69  
 99%(obs/new) = 103.56 / 106.24

Sample 5.5

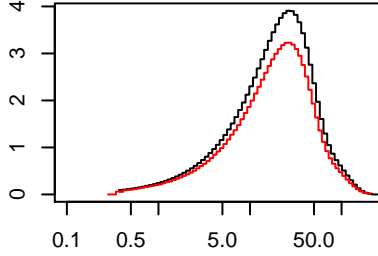

Sample 5.5 cumulative

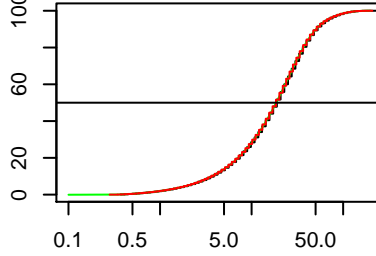

Sample statistics  
 Mass conserved = 1  
 Median(obs/new) = 19.32 / 19.29  
 1%(obs/new) = 0.68 / 0.67  
 5%(obs/new) = 2.06 / 2.08  
 25%(obs/new) = 9.16 / 8.94  
 75%(obs/new) = 33.82 / 32.19  
 95%(obs/new) = 64.96 / 69.36  
 99%(obs/new) = 113.7 / 106.24

Sample 10.5

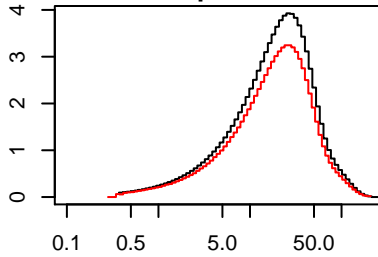

Sample 10.5 cumulative

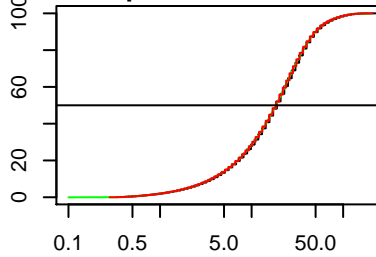

Sample statistics  
 Mass conserved = 1  
 Median(obs/new) = 17.6 / 17.71  
 1%(obs/new) = 0.68 / 0.67  
 5%(obs/new) = 2.06 / 2.08  
 25%(obs/new) = 9.16 / 8.94  
 75%(obs/new) = 30.8 / 32.19  
 95%(obs/new) = 64.96 / 63.69  
 99%(obs/new) = 103.56 / 106.24

Sample 20.5

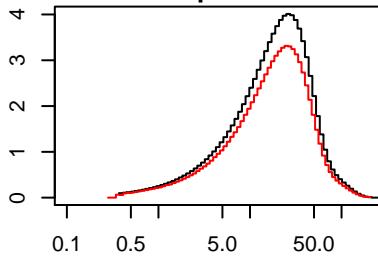

Sample 20.5 cumulative

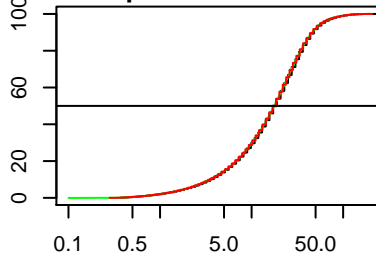

Sample statistics  
 Mass conserved = 1  
 Median(obs/new) = 17.6 / 17.71  
 1%(obs/new) = 0.68 / 0.67  
 5%(obs/new) = 1.88 / 1.91  
 25%(obs/new) = 8.35 / 8.21  
 75%(obs/new) = 30.8 / 29.56  
 95%(obs/new) = 59.17 / 58.48  
 99%(obs/new) = 103.56 / 97.56

Sample 25.5

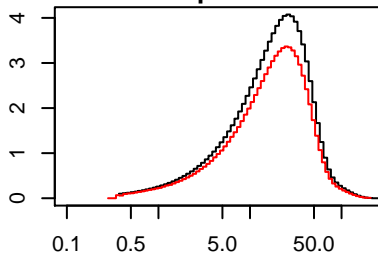

Sample 25.5 cumulative

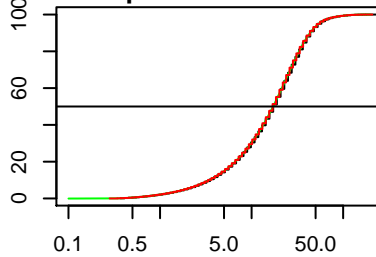

Sample statistics  
 Mass conserved = 1  
 Median(obs/new) = 17.6 / 17.71  
 1%(obs/new) = 0.68 / 0.67  
 5%(obs/new) = 1.88 / 1.91  
 25%(obs/new) = 8.35 / 8.21  
 75%(obs/new) = 30.8 / 29.56  
 95%(obs/new) = 53.91 / 53.7  
 99%(obs/new) = 85.94 / 89.58

Sample 30.5

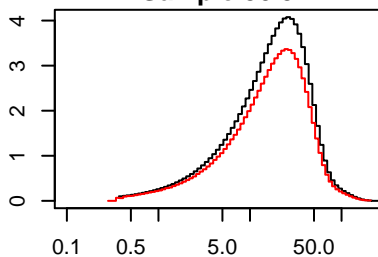

Sample 30.5 cumulative

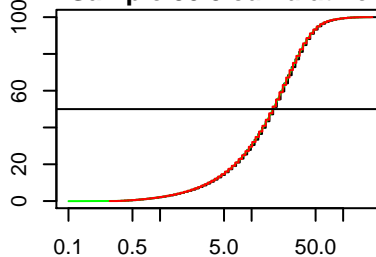

Sample statistics  
 Mass conserved = 1  
 Median(obs/new) = 17.6 / 17.71  
 1%(obs/new) = 0.68 / 0.67  
 5%(obs/new) = 1.88 / 1.91  
 25%(obs/new) = 8.35 / 8.21  
 75%(obs/new) = 30.8 / 29.56  
 95%(obs/new) = 53.91 / 53.7  
 99%(obs/new) = 85.94 / 89.58

Sample 35.5

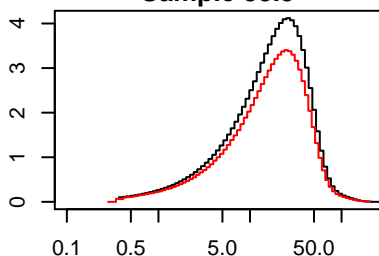

Sample 35.5 cumulative

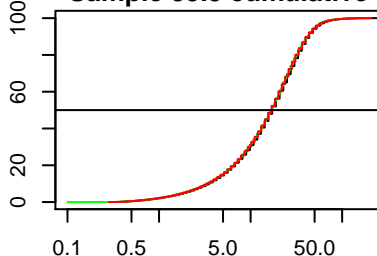

```
Sample statistics
Mass conserved = 1
Median(obs/new) = 17.6 / 16.26
1%(obs/new) = 0.68 / 0.67
5%(obs/new) = 1.88 / 1.91
25%(obs/new) = 8.35 / 8.21
75%(obs/new) = 28.06 / 29.56
95%(obs/new) = 49.11 / 49.31
99%(obs/new) = 78.28 / 75.53
```

Sample 40.5

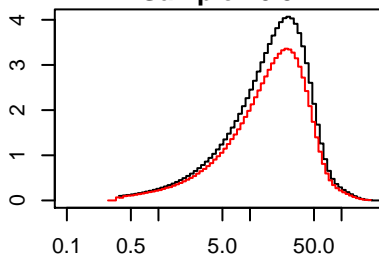

Sample 40.5 cumulative

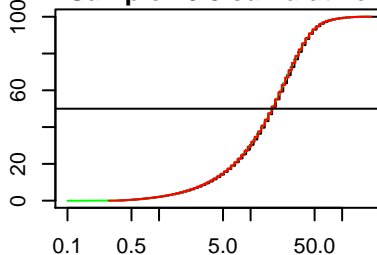

```
Sample statistics
Mass conserved = 1
Median(obs/new) = 17.6 / 17.71
1%(obs/new) = 0.68 / 0.67
5%(obs/new) = 1.88 / 1.91
25%(obs/new) = 8.35 / 8.21
75%(obs/new) = 30.8 / 29.56
95%(obs/new) = 53.91 / 53.7
99%(obs/new) = 85.94 / 89.58
```

Sample 45.5

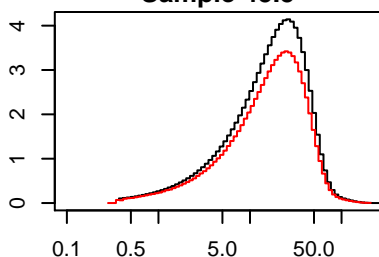

Sample 45.5 cumulative

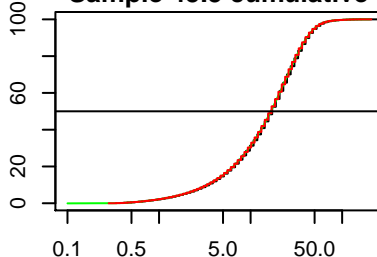

```
Sample statistics
Mass conserved = 1
Median(obs/new) = 16.04 / 16.26
1%(obs/new) = 0.68 / 0.67
5%(obs/new) = 1.88 / 1.91
25%(obs/new) = 8.35 / 8.21
75%(obs/new) = 28.06 / 29.56
95%(obs/new) = 49.11 / 49.31
99%(obs/new) = 71.31 / 75.53
```

Sample 50.5

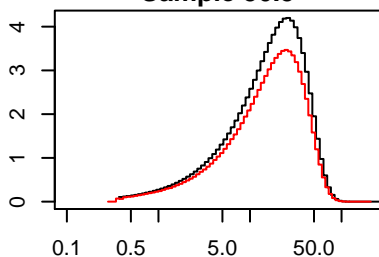

Sample 50.5 cumulative

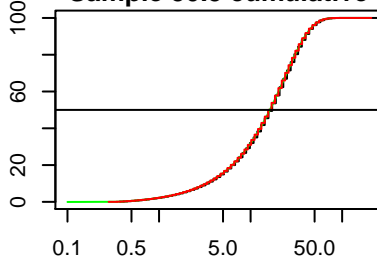

```
Sample statistics
Mass conserved = 1
Median(obs/new) = 16.04 / 16.26
1%(obs/new) = 0.68 / 0.67
5%(obs/new) = 1.88 / 1.75
25%(obs/new) = 7.61 / 7.54
75%(obs/new) = 28.06 / 27.14
95%(obs/new) = 44.74 / 45.28
99%(obs/new) = 59.17 / 63.69
```

Sample 55.5

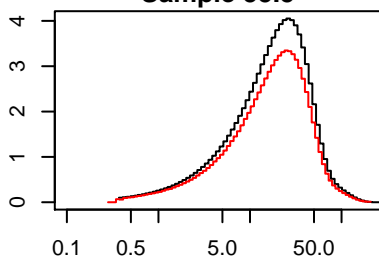

Sample 55.5 cumulative

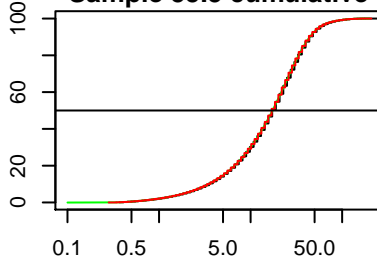

```
Sample statistics
Mass conserved = 1
Median(obs/new) = 17.6 / 17.71
1%(obs/new) = 0.68 / 0.67
5%(obs/new) = 1.88 / 1.91
25%(obs/new) = 8.35 / 8.21
75%(obs/new) = 30.8 / 29.56
95%(obs/new) = 53.91 / 53.7
99%(obs/new) = 94.34 / 89.58
```

Sample 60.5

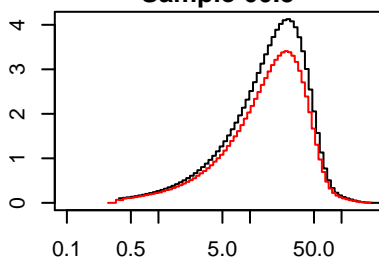

Sample 60.5 cumulative

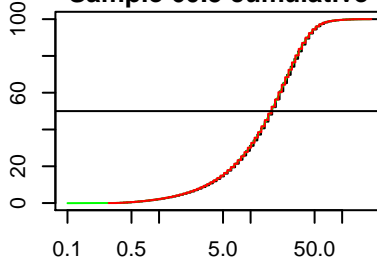

```
Sample statistics
Mass conserved = 1
Median(obs/new) = 16.04 / 16.26
1%(obs/new) = 0.68 / 0.67
5%(obs/new) = 1.88 / 1.91
25%(obs/new) = 8.35 / 8.21
75%(obs/new) = 28.06 / 29.56
95%(obs/new) = 49.11 / 49.31
99%(obs/new) = 78.28 / 75.53
```

Sample 65.5

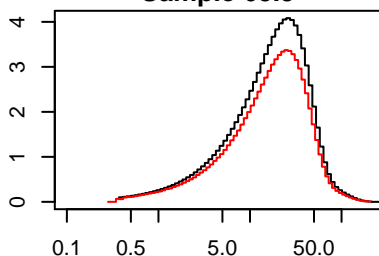

Sample 65.5 cumulative

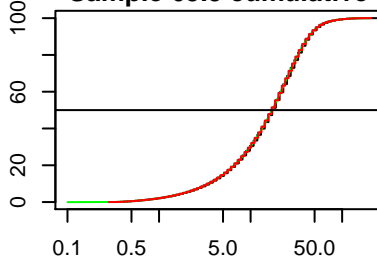

```
Sample statistics
Mass conserved = 1
Median(obs/new) = 17.6 / 17.71
1%(obs/new) = 0.68 / 0.67
5%(obs/new) = 1.88 / 1.91
25%(obs/new) = 8.35 / 8.21
75%(obs/new) = 28.06 / 29.56
95%(obs/new) = 53.91 / 53.7
99%(obs/new) = 85.94 / 89.58
```

Sample 70.5

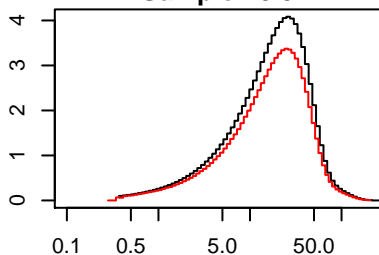

Sample 70.5 cumulative

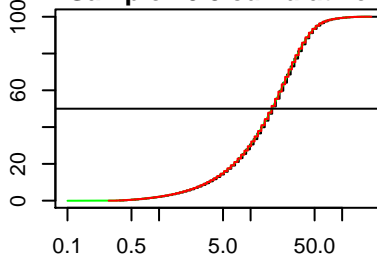

```
Sample statistics
Mass conserved = 1
Median(obs/new) = 17.6 / 17.71
1%(obs/new) = 0.68 / 0.67
5%(obs/new) = 1.88 / 1.91
25%(obs/new) = 8.35 / 8.21
75%(obs/new) = 28.06 / 29.56
95%(obs/new) = 53.91 / 53.7
99%(obs/new) = 85.94 / 89.58
```

Sample 75.5

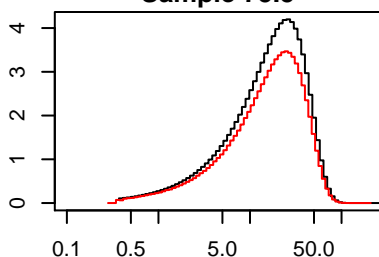

Sample 75.5 cumulative

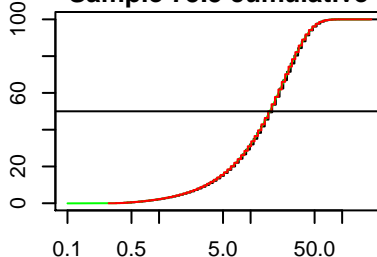

```
Sample statistics
Mass conserved = 1
Median(obs/new) = 16.04 / 16.26
1%(obs/new) = 0.68 / 0.67
5%(obs/new) = 1.88 / 1.75
25%(obs/new) = 7.61 / 7.54
75%(obs/new) = 28.06 / 27.14
95%(obs/new) = 44.74 / 45.28
99%(obs/new) = 59.17 / 63.69
```

Sample 80.5

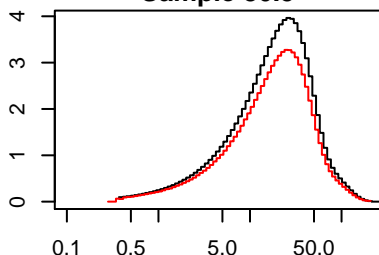

Sample 80.5 cumulative

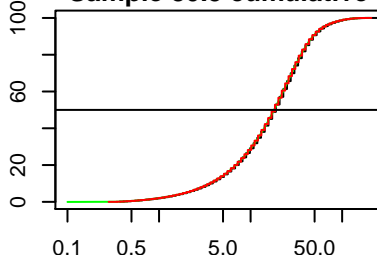

```
Sample statistics
Mass conserved = 1
Median(obs/new) = 17.6 / 17.71
1%(obs/new) = 0.68 / 0.67
5%(obs/new) = 2.06 / 1.91
25%(obs/new) = 8.35 / 8.94
75%(obs/new) = 33.82 / 32.19
95%(obs/new) = 64.96 / 63.69
99%(obs/new) = 103.56 / 106.24
```

Sample 85.5

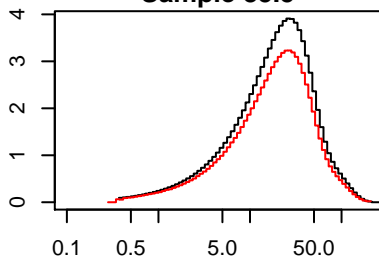

Sample 85.5 cumulative

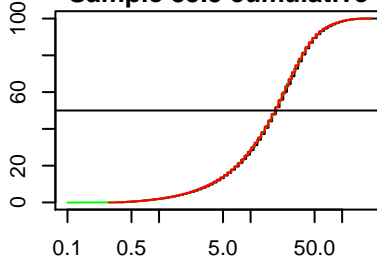

```
Sample statistics
Mass conserved = 1
Median(obs/new) = 19.32 / 19.29
1%(obs/new) = 0.68 / 0.67
5%(obs/new) = 2.06 / 2.08
25%(obs/new) = 9.16 / 8.94
75%(obs/new) = 33.82 / 32.19
95%(obs/new) = 64.96 / 69.36
99%(obs/new) = 113.7 / 106.24
```

Sample 90.5

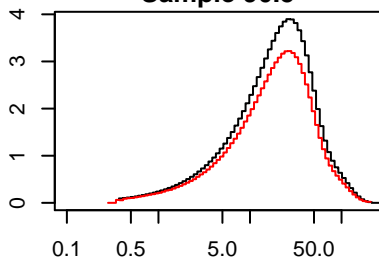

Sample 90.5 cumulative

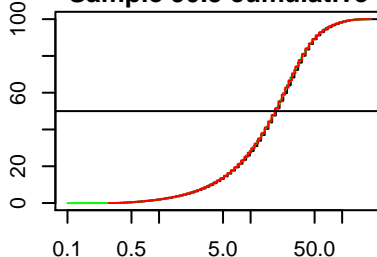

```
Sample statistics
Mass conserved = 1
Median(obs/new) = 19.32 / 19.29
1%(obs/new) = 0.68 / 0.67
5%(obs/new) = 2.06 / 2.08
25%(obs/new) = 9.16 / 8.94
75%(obs/new) = 33.82 / 32.19
95%(obs/new) = 64.96 / 69.36
99%(obs/new) = 113.7 / 115.7
```

Sample 95.5

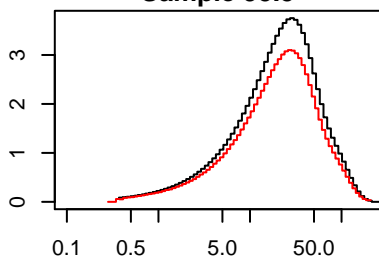

Sample 95.5 cumulative

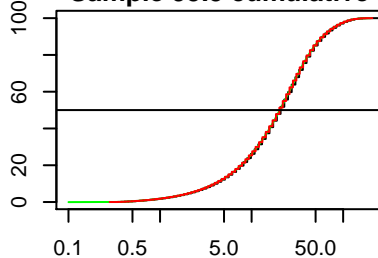

```
Sample statistics
Mass conserved = 1
Median(obs/new) = 21.21 / 21.01
1%(obs/new) = 0.74 / 0.73
5%(obs/new) = 2.06 / 2.08
25%(obs/new) = 9.16 / 9.74
75%(obs/new) = 37.12 / 38.18
95%(obs/new) = 78.28 / 82.26
99%(obs/new) = 124.77 / 126
```

Sample 100.5

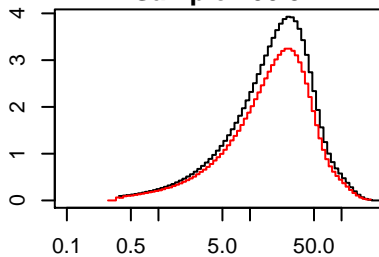

Sample 100.5 cumulative

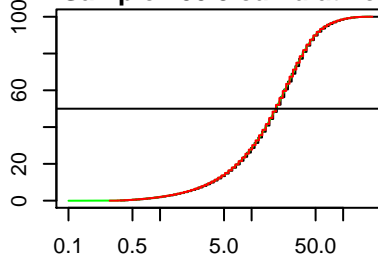

```
Sample statistics
Mass conserved = 1
Median(obs/new) = 17.6 / 17.71
1%(obs/new) = 0.68 / 0.67
5%(obs/new) = 2.06 / 2.08
25%(obs/new) = 9.16 / 8.94
75%(obs/new) = 30.8 / 32.19
95%(obs/new) = 64.96 / 63.69
99%(obs/new) = 103.56 / 106.24
```

Sample 105.5

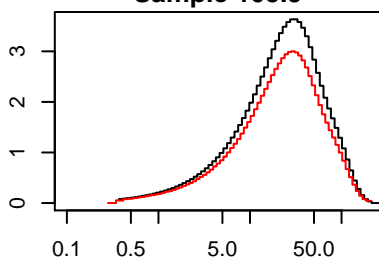

Sample 105.5 cumulative

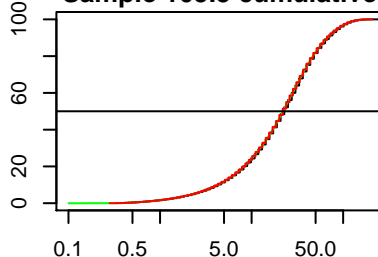

```
Sample statistics
Mass conserved = 1
Median(obs/new) = 21.21 / 22.88
1%(obs/new) = 0.74 / 0.73
5%(obs/new) = 2.26 / 2.27
25%(obs/new) = 10.06 / 10.61
75%(obs/new) = 40.75 / 41.58
95%(obs/new) = 85.94 / 89.58
99%(obs/new) = 124.77 / 126
```

Sample 110.5

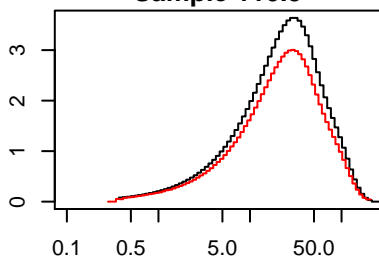

Sample 110.5 cumulative

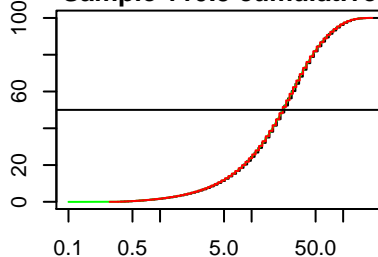

```
Sample statistics
Mass conserved = 1
Median(obs/new) = 21.21 / 22.88
1%(obs/new) = 0.74 / 0.73
5%(obs/new) = 2.26 / 2.27
25%(obs/new) = 10.06 / 10.61
75%(obs/new) = 40.75 / 41.58
95%(obs/new) = 85.94 / 89.58
99%(obs/new) = 124.77 / 126
```

Sample 115.5

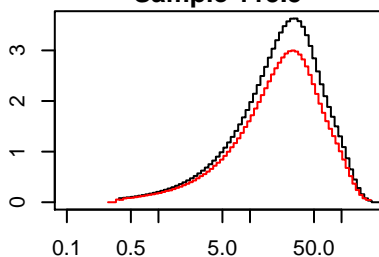

Sample 115.5 cumulative

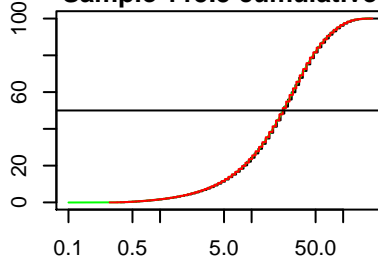

```
Sample statistics
Mass conserved = 1
Median(obs/new) = 21.21 / 22.88
1%(obs/new) = 0.74 / 0.73
5%(obs/new) = 2.26 / 2.27
25%(obs/new) = 10.06 / 10.61
75%(obs/new) = 40.75 / 41.58
95%(obs/new) = 85.94 / 89.58
99%(obs/new) = 124.77 / 126
```

Sample 120.5

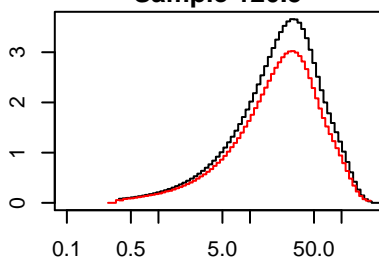

Sample 120.5 cumulative

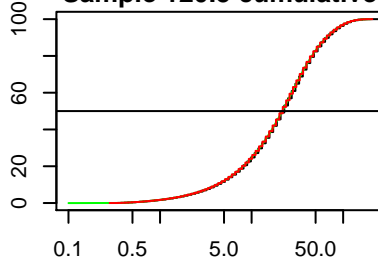

```
Sample statistics
Mass conserved = 1
Median(obs/new) = 21.21 / 21.01
1%(obs/new) = 0.74 / 0.73
5%(obs/new) = 2.26 / 2.27
25%(obs/new) = 10.06 / 9.74
75%(obs/new) = 40.75 / 38.18
95%(obs/new) = 85.94 / 89.58
99%(obs/new) = 124.77 / 126
```

Sample 125.5

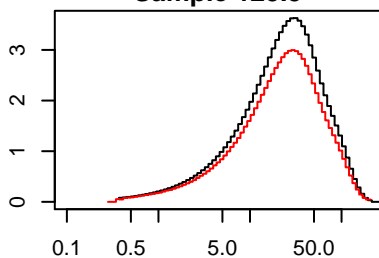

Sample 125.5 cumulative

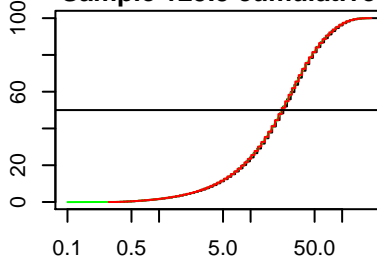

Sample statistics  
 Mass conserved = 1  
 Median(obs/new) = 21.21 / 22.88  
 1%(obs/new) = 0.74 / 0.73  
 5%(obs/new) = 2.26 / 2.27  
 25%(obs/new) = 10.06 / 10.61  
 75%(obs/new) = 40.75 / 41.58  
 95%(obs/new) = 85.94 / 89.58  
 99%(obs/new) = 124.77 / 126

Sample 135.5

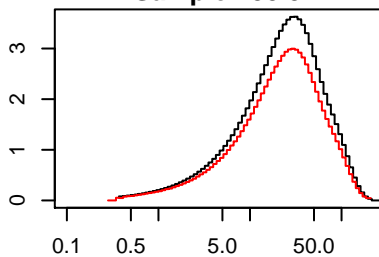

Sample 135.5 cumulative

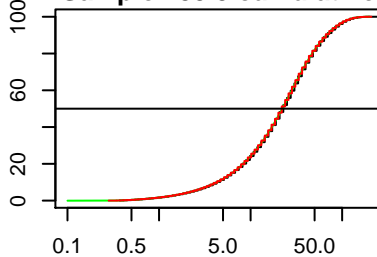

Sample statistics  
 Mass conserved = 1  
 Median(obs/new) = 21.21 / 22.88  
 1%(obs/new) = 0.74 / 0.73  
 5%(obs/new) = 2.26 / 2.27  
 25%(obs/new) = 10.06 / 10.61  
 75%(obs/new) = 40.75 / 41.58  
 95%(obs/new) = 85.94 / 89.58  
 99%(obs/new) = 124.77 / 126

Sample 140.5

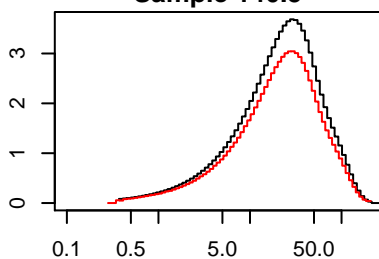

Sample 140.5 cumulative

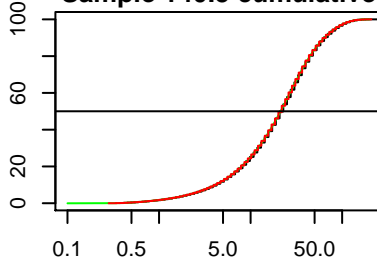

Sample statistics  
 Mass conserved = 1  
 Median(obs/new) = 21.21 / 21.01  
 1%(obs/new) = 0.74 / 0.73  
 5%(obs/new) = 2.26 / 2.27  
 25%(obs/new) = 10.06 / 9.74  
 75%(obs/new) = 37.12 / 38.18  
 95%(obs/new) = 85.94 / 82.26  
 99%(obs/new) = 124.77 / 126

Sample 145.5

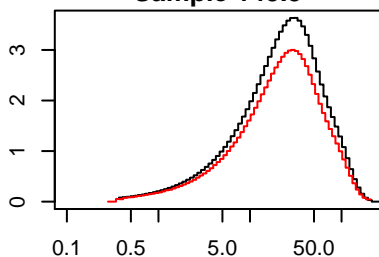

Sample 145.5 cumulative

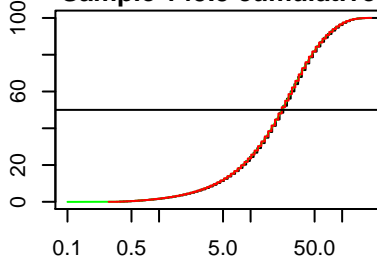

Sample statistics  
 Mass conserved = 1  
 Median(obs/new) = 21.21 / 22.88  
 1%(obs/new) = 0.74 / 0.73  
 5%(obs/new) = 2.26 / 2.27  
 25%(obs/new) = 10.06 / 10.61  
 75%(obs/new) = 40.75 / 41.58  
 95%(obs/new) = 85.94 / 89.58  
 99%(obs/new) = 124.77 / 126

Sample 150.5

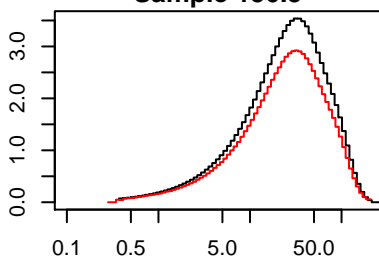

Sample 150.5 cumulative

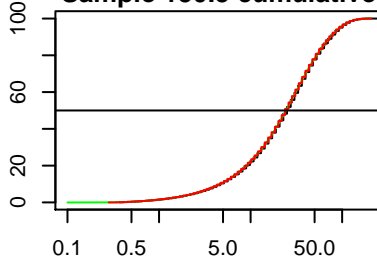

Sample statistics  
 Mass conserved = 1  
 Median(obs/new) = 23.29 / 24.92  
 1%(obs/new) = 0.81 / 0.8  
 5%(obs/new) = 2.49 / 2.47  
 25%(obs/new) = 11.04 / 11.56  
 75%(obs/new) = 44.74 / 45.28  
 95%(obs/new) = 94.34 / 97.56  
 99%(obs/new) = 136.97 / 137.21

Sample 155.5

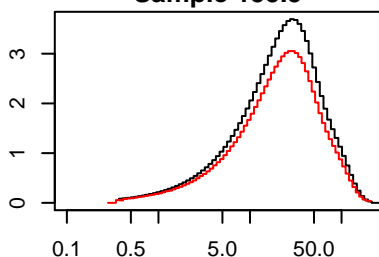

Sample 155.5 cumulative

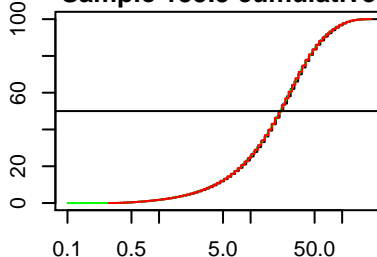

Sample statistics  
 Mass conserved = 1  
 Median(obs/new) = 21.21 / 21.01  
 1%(obs/new) = 0.74 / 0.73  
 5%(obs/new) = 2.26 / 2.27  
 25%(obs/new) = 10.06 / 9.74  
 75%(obs/new) = 37.12 / 38.18  
 95%(obs/new) = 85.94 / 82.26  
 99%(obs/new) = 124.77 / 126

Sample 160.5

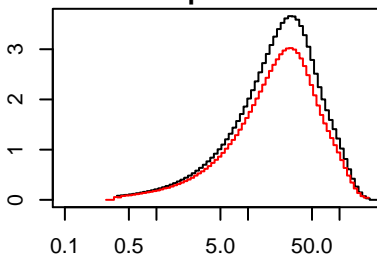

Sample 160.5 cumulative

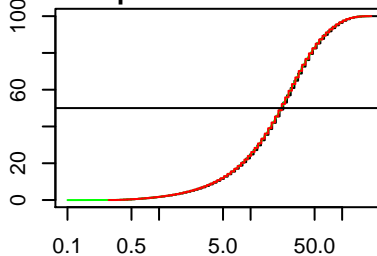

Sample statistics  
 Mass conserved = 1  
 Median(obs/new) = 21.21 / 21.01  
 1%(obs/new) = 0.74 / 0.73  
 5%(obs/new) = 2.26 / 2.27  
 25%(obs/new) = 10.06 / 9.74  
 75%(obs/new) = 40.75 / 38.18  
 95%(obs/new) = 85.94 / 89.58  
 99%(obs/new) = 124.77 / 126

Sample 165.5

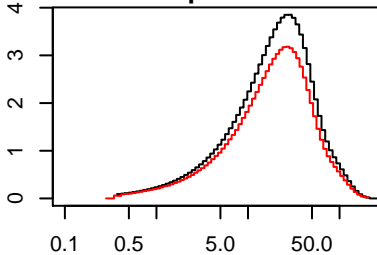

Sample 165.5 cumulative

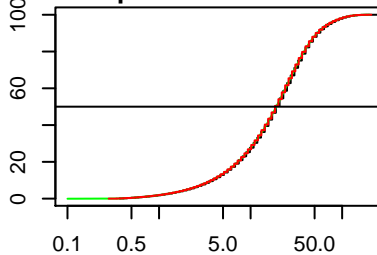

Sample statistics  
 Mass conserved = 1  
 Median(obs/new) = 19.32 / 19.29  
 1%(obs/new) = 0.68 / 0.67  
 5%(obs/new) = 2.06 / 2.08  
 25%(obs/new) = 9.16 / 8.94  
 75%(obs/new) = 33.82 / 35.05  
 95%(obs/new) = 71.31 / 69.36  
 99%(obs/new) = 113.7 / 115.7

Sample 170.5

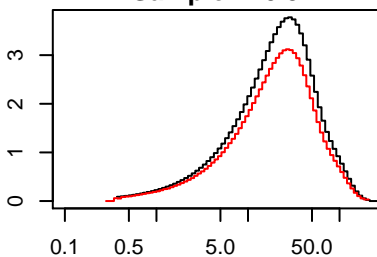

Sample 170.5 cumulative

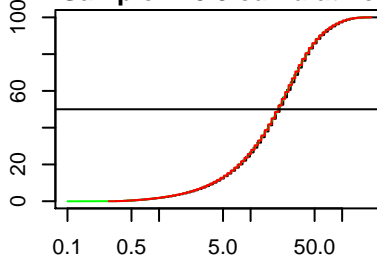

Sample statistics  
 Mass conserved = 1  
 Median(obs/new) = 19.32 / 19.29  
 1%(obs/new) = 0.74 / 0.73  
 5%(obs/new) = 2.06 / 2.08  
 25%(obs/new) = 9.16 / 9.74  
 75%(obs/new) = 37.12 / 35.05  
 95%(obs/new) = 78.28 / 75.53  
 99%(obs/new) = 124.77 / 115.7

Sample 175.5

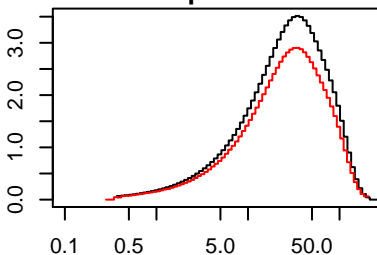

Sample 175.5 cumulative

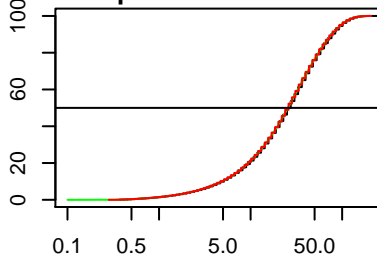

Sample statistics  
 Mass conserved = 1  
 Median(obs/new) = 25.56 / 24.92  
 1%(obs/new) = 0.81 / 0.8  
 5%(obs/new) = 2.49 / 2.7  
 25%(obs/new) = 12.12 / 11.56  
 75%(obs/new) = 49.11 / 49.31  
 95%(obs/new) = 94.34 / 97.56  
 99%(obs/new) = 136.97 / 137.21

Sample 180.5

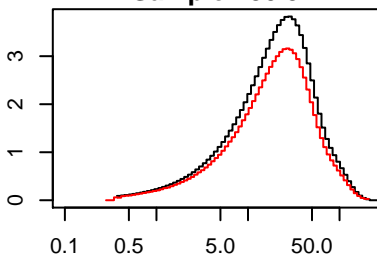

Sample 180.5 cumulative

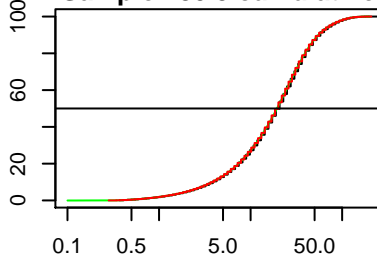

Sample statistics  
 Mass conserved = 1  
 Median(obs/new) = 19.32 / 19.29  
 1%(obs/new) = 0.68 / 0.67  
 5%(obs/new) = 2.06 / 2.08  
 25%(obs/new) = 9.16 / 8.94  
 75%(obs/new) = 33.82 / 35.05  
 95%(obs/new) = 71.31 / 75.53  
 99%(obs/new) = 113.7 / 115.7

Sample 185.5

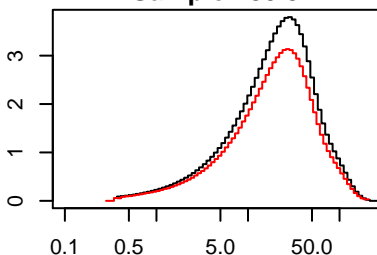

Sample 185.5 cumulative

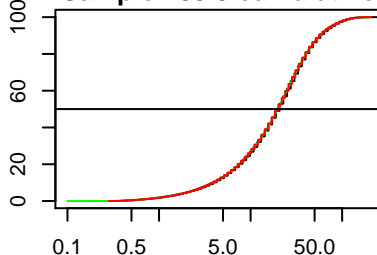

Sample statistics  
 Mass conserved = 1  
 Median(obs/new) = 19.32 / 19.29  
 1%(obs/new) = 0.68 / 0.73  
 5%(obs/new) = 2.06 / 2.08  
 25%(obs/new) = 9.16 / 9.74  
 75%(obs/new) = 33.82 / 35.05  
 95%(obs/new) = 78.28 / 75.53  
 99%(obs/new) = 113.7 / 115.7

Sample 190.5

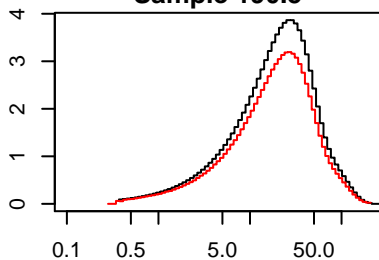

Sample 190.5 cumulative

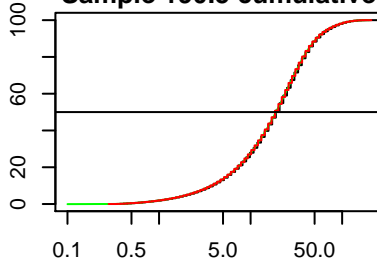

Sample statistics  
 Mass conserved = 1  
 Median(obs/new) = 19.32 / 19.29  
 1%(obs/new) = 0.68 / 0.67  
 5%(obs/new) = 2.06 / 2.08  
 25%(obs/new) = 9.16 / 8.94  
 75%(obs/new) = 33.82 / 32.19  
 95%(obs/new) = 71.31 / 69.36  
 99%(obs/new) = 113.7 / 115.7

Sample 195.5

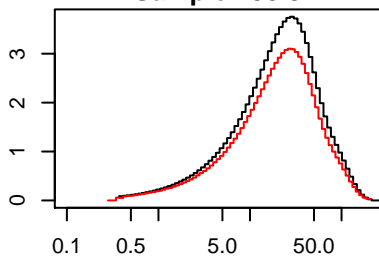

Sample 195.5 cumulative

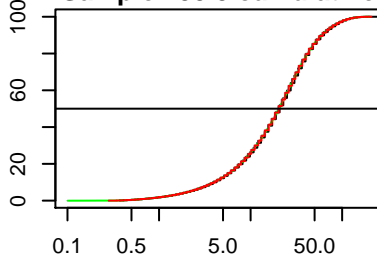

Sample statistics  
 Mass conserved = 1  
 Median(obs/new) = 21.21 / 21.01  
 1%(obs/new) = 0.74 / 0.73  
 5%(obs/new) = 2.06 / 2.08  
 25%(obs/new) = 9.16 / 9.74  
 75%(obs/new) = 37.12 / 35.05  
 95%(obs/new) = 78.28 / 82.26  
 99%(obs/new) = 124.77 / 126

Sample 200.5

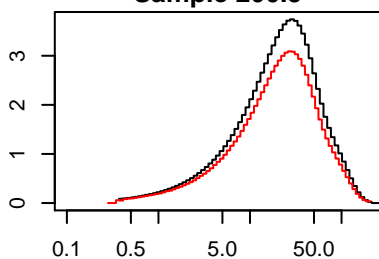

Sample 200.5 cumulative

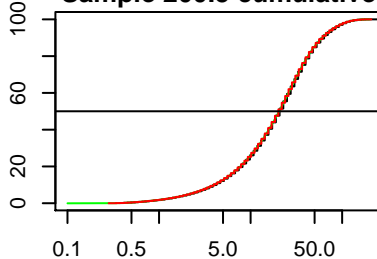

Sample statistics  
 Mass conserved = 1  
 Median(obs/new) = 21.21 / 21.01  
 1%(obs/new) = 0.74 / 0.73  
 5%(obs/new) = 2.26 / 2.08  
 25%(obs/new) = 10.06 / 9.74  
 75%(obs/new) = 37.12 / 38.18  
 95%(obs/new) = 78.28 / 82.26  
 99%(obs/new) = 124.77 / 126

Sample 205.5

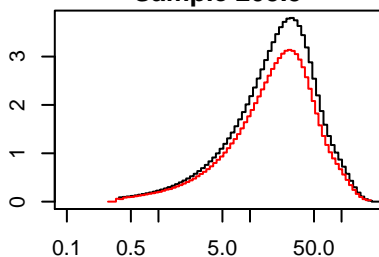

Sample 205.5 cumulative

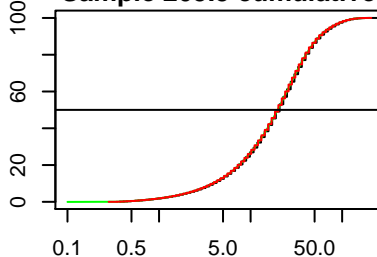

Sample statistics  
 Mass conserved = 1  
 Median(obs/new) = 19.32 / 19.29  
 1%(obs/new) = 0.68 / 0.73  
 5%(obs/new) = 2.06 / 2.08  
 25%(obs/new) = 9.16 / 9.74  
 75%(obs/new) = 33.82 / 35.05  
 95%(obs/new) = 78.28 / 75.53  
 99%(obs/new) = 113.7 / 115.7

Sample 210.5

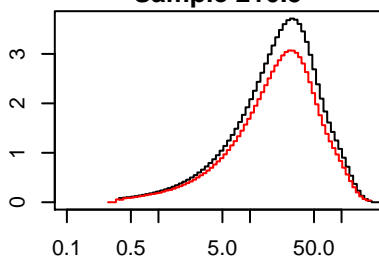

Sample 210.5 cumulative

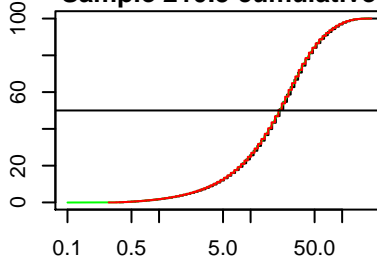

Sample statistics  
 Mass conserved = 1  
 Median(obs/new) = 21.21 / 21.01  
 1%(obs/new) = 0.74 / 0.73  
 5%(obs/new) = 2.26 / 2.27  
 25%(obs/new) = 10.06 / 9.74  
 75%(obs/new) = 37.12 / 38.18  
 95%(obs/new) = 85.94 / 82.26  
 99%(obs/new) = 124.77 / 126

Sample 215.5

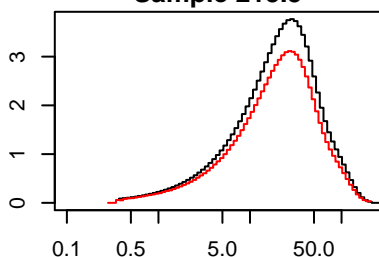

Sample 215.5 cumulative

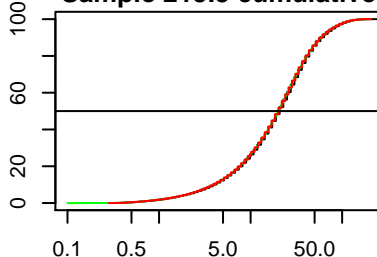

Sample statistics  
 Mass conserved = 1  
 Median(obs/new) = 19.32 / 19.29  
 1%(obs/new) = 0.74 / 0.73  
 5%(obs/new) = 2.06 / 2.08  
 25%(obs/new) = 9.16 / 9.74  
 75%(obs/new) = 37.12 / 35.05  
 95%(obs/new) = 78.28 / 75.53  
 99%(obs/new) = 124.77 / 115.7

Sample 220.5

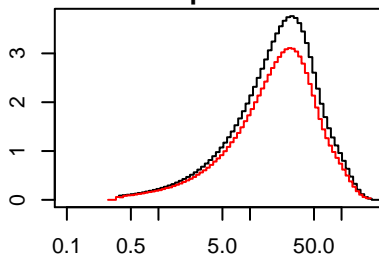

Sample 220.5 cumulative

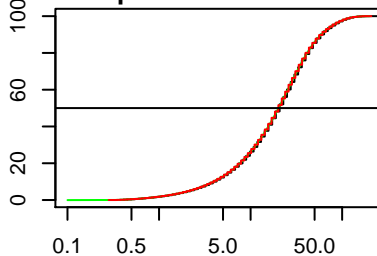

Sample statistics  
 Mass conserved = 1  
 Median(obs/new) = 19.32 / 21.01  
 1%(obs/new) = 0.74 / 0.73  
 5%(obs/new) = 2.06 / 2.08  
 25%(obs/new) = 9.16 / 9.74  
 75%(obs/new) = 37.12 / 35.05  
 95%(obs/new) = 78.28 / 82.26  
 99%(obs/new) = 124.77 / 115.7

Sample 225.5

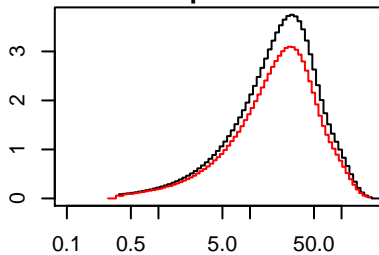

Sample 225.5 cumulative

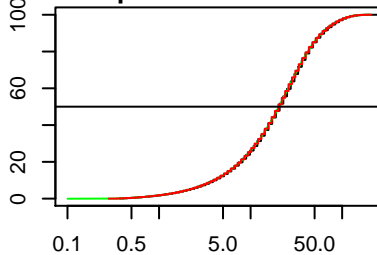

Sample statistics  
 Mass conserved = 1  
 Median(obs/new) = 21.21 / 21.01  
 1%(obs/new) = 0.74 / 0.73  
 5%(obs/new) = 2.26 / 2.08  
 25%(obs/new) = 10.06 / 9.74  
 75%(obs/new) = 37.12 / 38.18  
 95%(obs/new) = 78.28 / 82.26  
 99%(obs/new) = 124.77 / 126

Sample 230.5

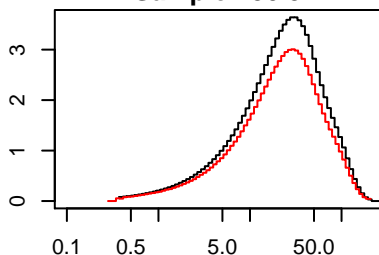

Sample 230.5 cumulative

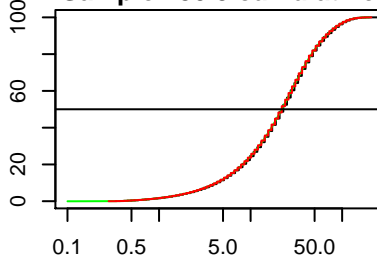

Sample statistics  
 Mass conserved = 1  
 Median(obs/new) = 21.21 / 22.88  
 1%(obs/new) = 0.74 / 0.73  
 5%(obs/new) = 2.26 / 2.27  
 25%(obs/new) = 10.06 / 10.61  
 75%(obs/new) = 40.75 / 41.58  
 95%(obs/new) = 85.94 / 89.58  
 99%(obs/new) = 124.77 / 126

Sample 235.5

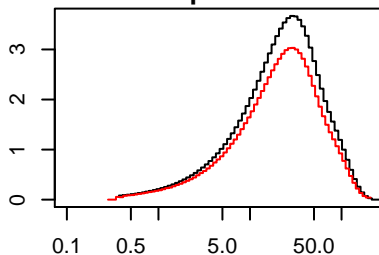

Sample 235.5 cumulative

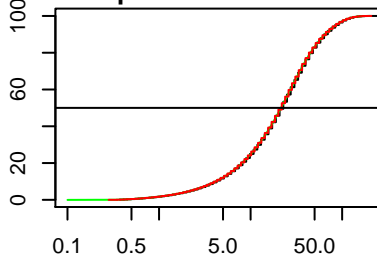

Sample statistics  
 Mass conserved = 1  
 Median(obs/new) = 21.21 / 21.01  
 1%(obs/new) = 0.74 / 0.73  
 5%(obs/new) = 2.26 / 2.27  
 25%(obs/new) = 10.06 / 9.74  
 75%(obs/new) = 40.75 / 38.18  
 95%(obs/new) = 85.94 / 82.26  
 99%(obs/new) = 124.77 / 126

Sample 240.5

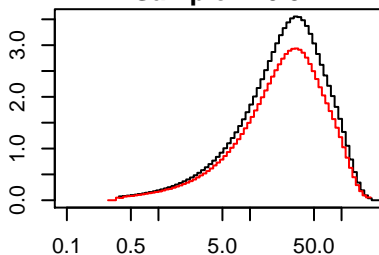

Sample 240.5 cumulative

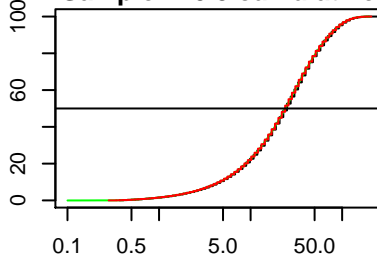

Sample statistics  
 Mass conserved = 1  
 Median(obs/new) = 23.29 / 24.92  
 1%(obs/new) = 0.74 / 0.8  
 5%(obs/new) = 2.49 / 2.47  
 25%(obs/new) = 11.04 / 11.56  
 75%(obs/new) = 44.74 / 45.28  
 95%(obs/new) = 94.34 / 89.58  
 99%(obs/new) = 136.97 / 137.21

Sample 245.5

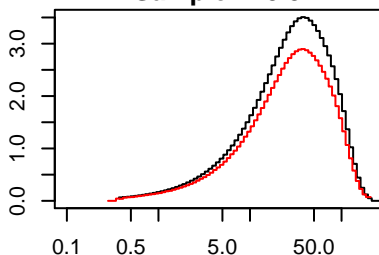

Sample 245.5 cumulative

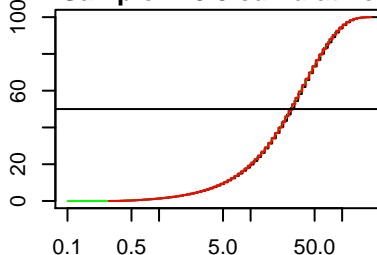

Sample statistics  
 Mass conserved = 1  
 Median(obs/new) = 28.06 / 27.14  
 1%(obs/new) = 0.81 / 0.8  
 5%(obs/new) = 2.73 / 2.7  
 25%(obs/new) = 12.12 / 12.59  
 75%(obs/new) = 53.91 / 53.7  
 95%(obs/new) = 103.56 / 97.56  
 99%(obs/new) = 136.97 / 137.21



Sample 250.5

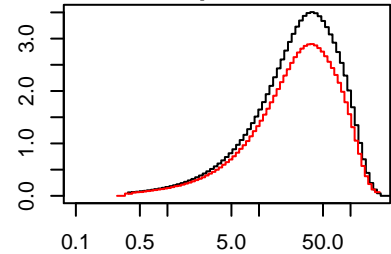

Sample 250.5 cumulative

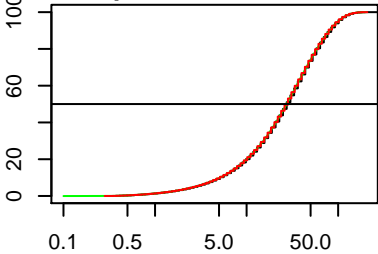

Sample statistics  
Mass conserved = 1  
Median(obs/new) = 28.06 / 27.14  
1%(obs/new) = 0.81 / 0.8  
5%(obs/new) = 2.73 / 2.7  
25%(obs/new) = 12.12 / 12.59  
75%(obs/new) = 49.11 / 49.31  
95%(obs/new) = 103.56 / 97.56  
99%(obs/new) = 136.97 / 137.21

5/25/50/75/95 percentiles

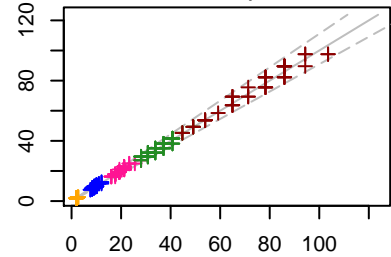

OC437-07-GC66 percentiles

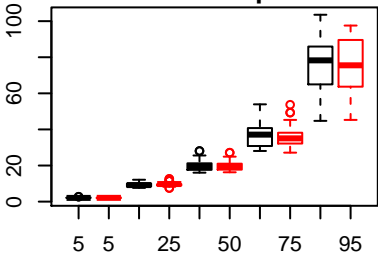

Site statistics  
Percentiles Pearson's corr. = 0.98  
Mean normalized bias = 0.01
