# Supplementary material for: Twelve thousand years of dust: the Holocene global dust cycle constrained by natural archives
Source: Copernicus journal article supplement (doi:10.5194/cp-11-869-2015), 2015-06-11
Supplement: Supplementary file 43 [file cp-11-869-2015-supplement.zip]

## Jiuzhoutai

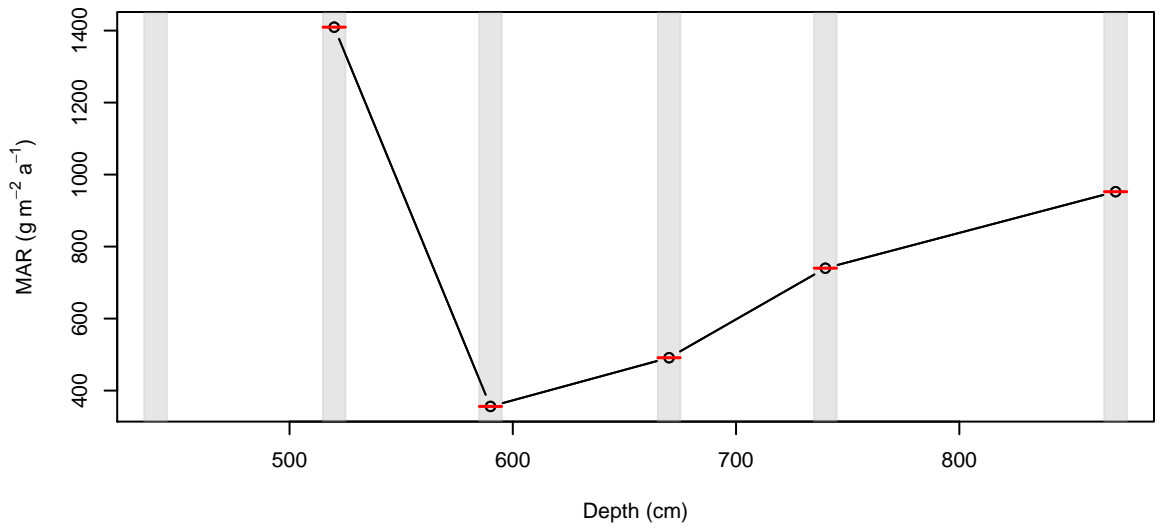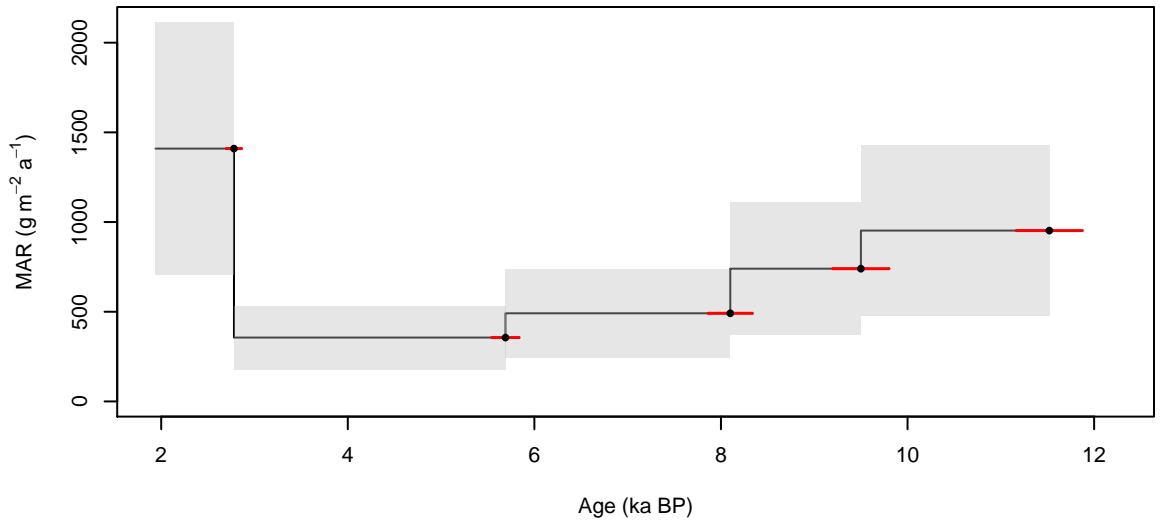

Jiuzhoutai

Reference: Sun et al., 2003; Kohfeld and Harrison, 2003

Depth: Assume 10cm thickenss

Age: 14C

Age error: Assuming 6.8%

SBMAR: LSR\*DBD, with LSR for each soil horizon

SBMAR err: From LSR and DBD

DBD: Assume 1.48 g/cm3 (Kohfeld and Harrison, 2003)

DBD err: Assume 15% (Kohefled and Harrison, 2003)

EC: Assume it is 1, organic content negligible (Derbyshire, 1982)

Size: average estimates io of size classes based on Derbyshire, 1982
