# Supplementary material for: Twelve thousand years of dust: the Holocene global dust cycle constrained by natural archives
Source: Copernicus journal article supplement (doi:10.5194/cp-11-869-2015), 2015-06-11
Supplement: Supplementary file 45 [file cp-11-869-2015-supplement.zip]

Sample 0cm

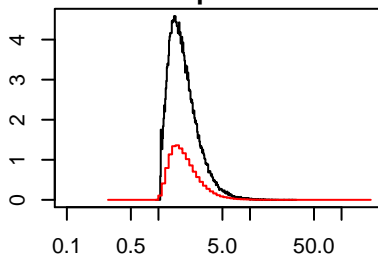

Sample 0cm cumulative

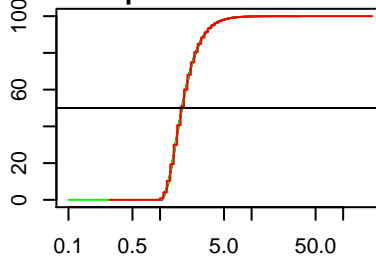

```
Sample statistics
Mass conserved = 1
Median(obs/new) = 1.73 / 1.75
1%(obs/new) = 1.07 / 1.04
5%(obs/new) = 1.16 / 1.14
25%(obs/new) = 1.41 / 1.47
75%(obs/new) = 2.26 / 2.27
95%(obs/new) = 3.77 / 3.8
99%(obs/new) = 5.95 / 5.83
```

Sample 10cm

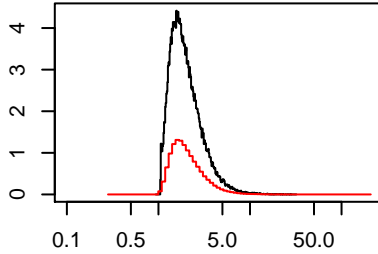

Sample 10cm cumulative

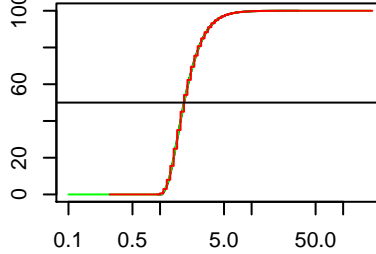

```
Sample statistics
Mass conserved = 1
Median(obs/new) = 1.83 / 1.91
1%(obs/new) = 1.08 / 1.04
5%(obs/new) = 1.19 / 1.14
25%(obs/new) = 1.47 / 1.47
75%(obs/new) = 2.45 / 2.47
95%(obs/new) = 4.15 / 4.14
99%(obs/new) = 6.75 / 6.92
```

Sample 15cm

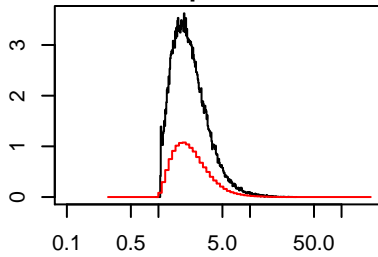

Sample 15cm cumulative

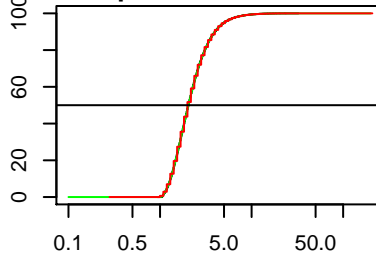

```
Sample statistics
Mass conserved = 1
Median(obs/new) = 2.05 / 2.08
1%(obs/new) = 1.08 / 1.04
5%(obs/new) = 1.19 / 1.24
25%(obs/new) = 1.57 / 1.61
75%(obs/new) = 2.82 / 2.94
95%(obs/new) = 5.04 / 4.91
99%(obs/new) = 8.54 / 8.94
```

Sample 25cm

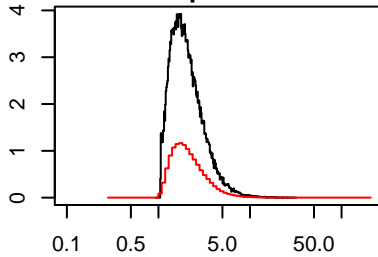

Sample 25cm cumulative

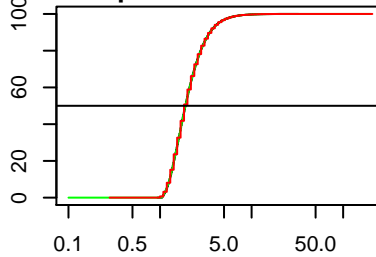

```
Sample statistics
Mass conserved = 1
Median(obs/new) = 1.88 / 1.91
1%(obs/new) = 1.08 / 1.04
5%(obs/new) = 1.19 / 1.14
25%(obs/new) = 1.49 / 1.47
75%(obs/new) = 2.56 / 2.47
95%(obs/new) = 4.33 / 4.51
99%(obs/new) = 7.03 / 6.92
```

5/25/50/75/95 percentiles

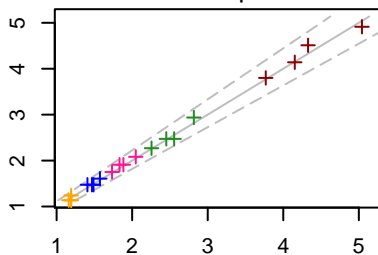

V21-146 percentiles

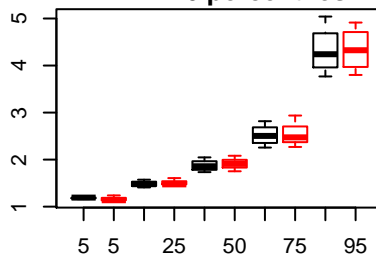

```
Site statistics
Percentiles Pearson's corr. = 0.974
Mean normalized bias = 0.01
```
