# Supplementary material for: Twelve thousand years of dust: the Holocene global dust cycle constrained by natural archives
Source: Copernicus journal article supplement (doi:10.5194/cp-11-869-2015), 2015-06-11
Supplement: Supplementary file 49 [file cp-11-869-2015-supplement.zip]

## Zagoskin\_Lake

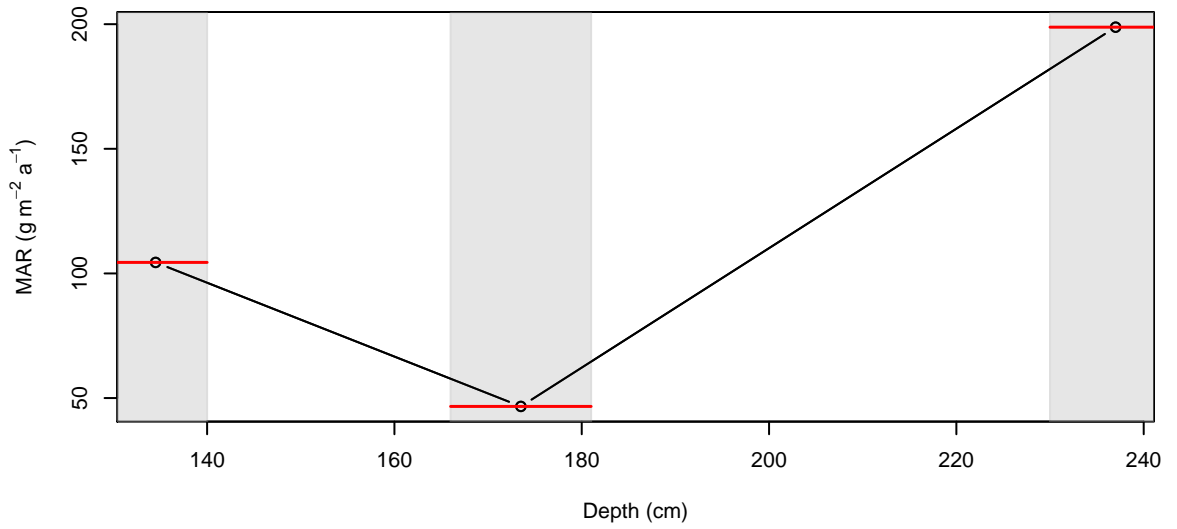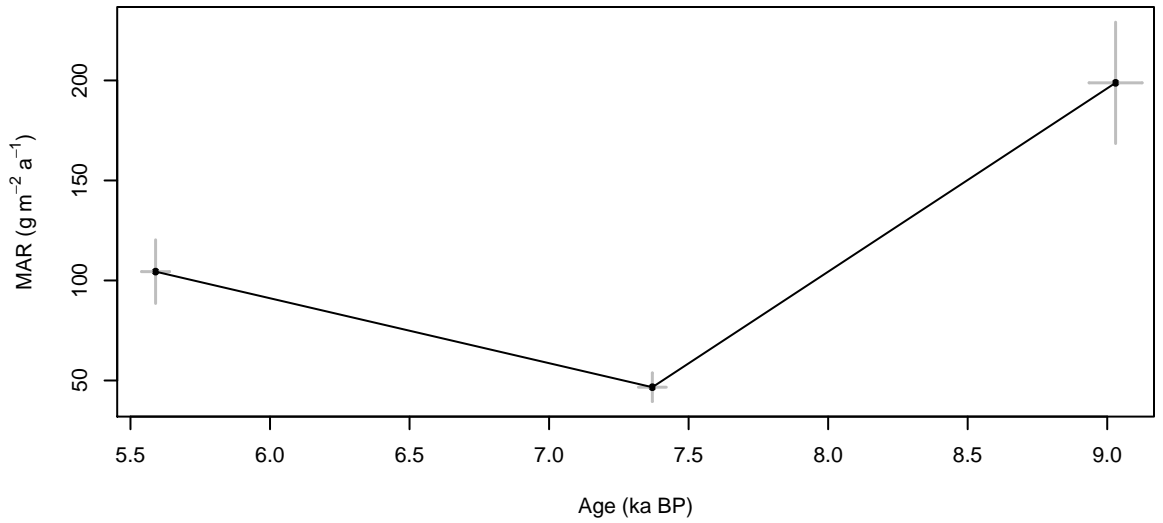

Zagoskin\_Lake  
Reference: Muhs et al., 2003b  
Depth: depth ranges for  $^{14}\text{C}$  sampling from paper  
Age: Calibrated  $^{14}\text{C}$  ages  
Age error: from  $^{14}\text{C}$  calibration (INTCAL 98)  
SBMAR: LSR\*BD.  
SBMAR err: from LSR and BD  
DBD: Estimated  
DBD err: Assuming 30%  
EC: Removed biogenic silica, organic carbon, and tephra layer  
EC error: Assuming 5%  
Size: sieve and pipette; laser diffraction
