# Supplementary material for: Twelve thousand years of dust: the Holocene global dust cycle constrained by natural archives
Source: Copernicus journal article supplement (doi:10.5194/cp-11-869-2015), 2015-06-11
Supplement: Supplementary file 50 [file cp-11-869-2015-supplement.zip]

## V21-146

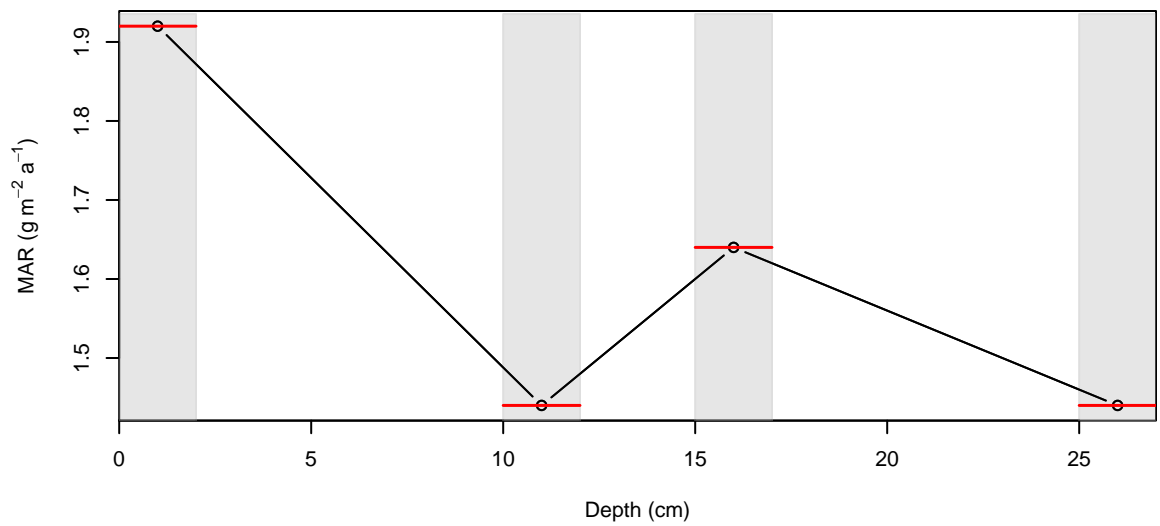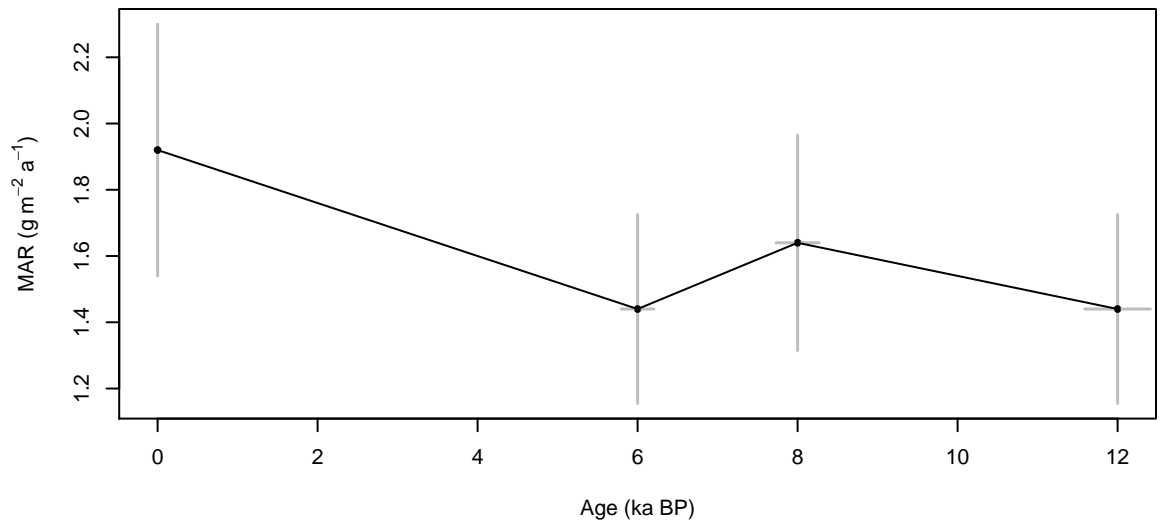

V21-146

Reference: Hovan et al. 1991

Depth: depth given in paper. Assuming sample thickness is 2 cm.

Age: age is top, approximating to center. Age is  $\delta 18\text{O}$  correlation with SPECMAP (Imbrie et al., 1984)

Age error: assuming 6.8%

SBMAR: LSR. DBD determined from dried salt content, assuming a constant paleosalinity.

SBMAR err: assume 6.8% from age error, 5% from terrigenous fraction.

DBD uncertainty will be 25% (Rea and Leinen, 1988).

EC: terrigenous fraction. Volcanic input removed by visual estimation from smear slides

EC err: assume 5%

Size: Coulter Counter 256 channels 1-30  $\mu\text{m}$ , used dispersant
