# Supplementary material for: Twelve thousand years of dust: the Holocene global dust cycle constrained by natural archives
Source: Copernicus journal article supplement (doi:10.5194/cp-11-869-2015), 2015-06-11
Supplement: Supplementary file 53 [file cp-11-869-2015-supplement.zip]

## Vostok-BH7

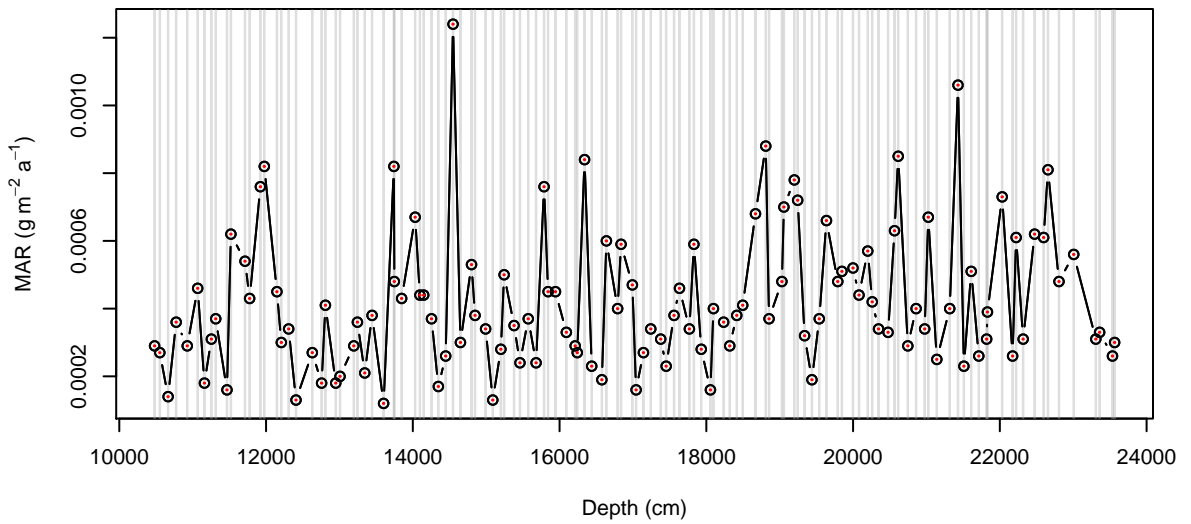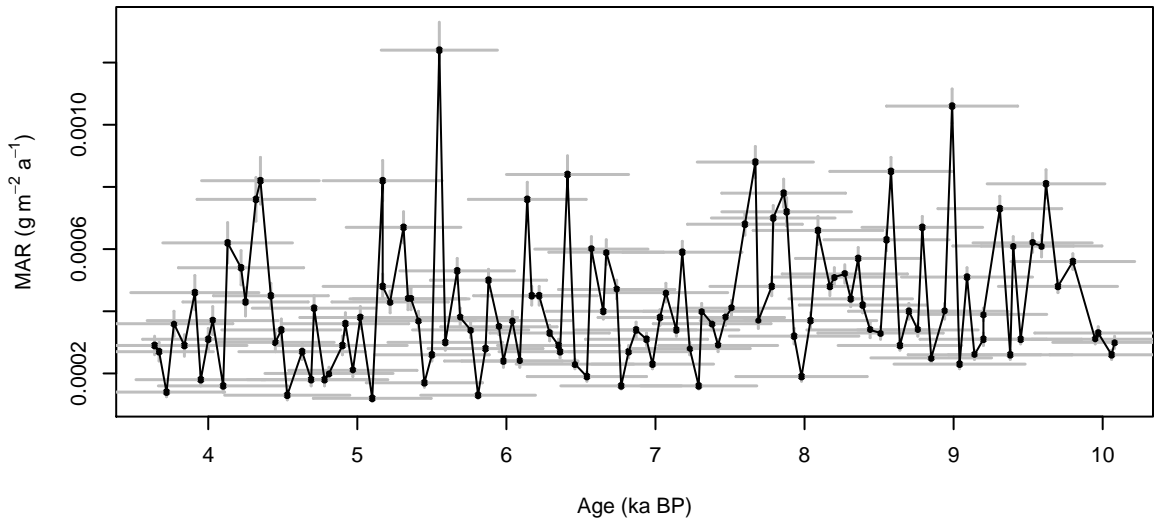

Vostok-BH7

Reference: Delmonte et al., 2004

Depth: depth intervals specified in paper

Age: AICC2012 chronology (Veres et al., 2013)

Age error: from AICC2012 chronology

SBMAR: from AICC2012 chronology

SBMAR err: from AICC2012 chronology

EC: from Coulter Counter volume concentration data, assuming density 2.5 g/cm<sup>3</sup>

EC err: from Coulter Counter replicate measurements

Size: Beckman Coulter Counter Multisizer II. Distributions cut at 5 um diamter (Delmonte et al., 2013)
