# Supplementary material for: Twelve thousand years of dust: the Holocene global dust cycle constrained by natural archives
Source: Copernicus journal article supplement (doi:10.5194/cp-11-869-2015), 2015-06-11
Supplement: Supplementary file 55 [file cp-11-869-2015-supplement.zip]

# TT013-PC72

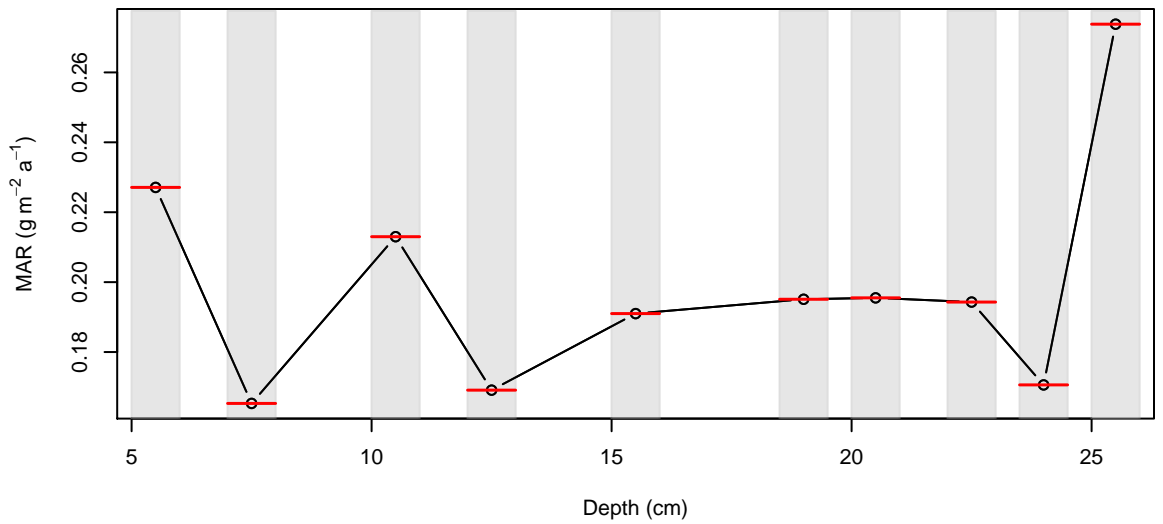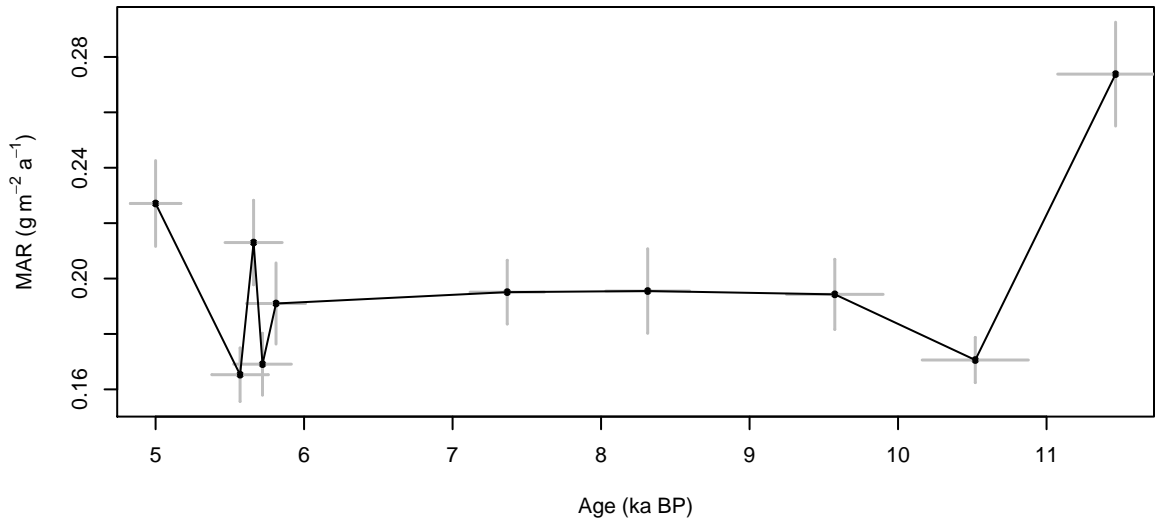

TT013-PC72

Reference: Anderson et al. 2006

Fluxes of lithogenic material (dust) were calculated based on the  $^{230}\text{Th}$ -normalized accumulation rate of  $^{232}\text{Th}$ , assuming a  $^{232}\text{Th}$  content of 10 ppm in dust

Age model combines  $^{14}\text{C}$  and oxygen stratigraph. Age model ( $^{14}\text{C}$  part) uncertainties are reported in Anderson et al. 2007 (Marine Chem.). Full age models in Murray et al. 2000 (PO)

Depth Depth intervals given in paper

Age: Assuming age is center. Age is d180

SBMAR:  $^{230}\text{Th}$

SBMAR err: Assume 5%

EC:  $^{232}\text{Th}$ -based dust concentration (10 ppm  $^{23}\text{Th}$  in dust;  $1/0.242530074 \text{ dpm} \rightarrow \text{ppm}$ )

EC: err
