# Supplementary material for: Twelve thousand years of dust: the Holocene global dust cycle constrained by natural archives
Source: Copernicus journal article supplement (doi:10.5194/cp-11-869-2015), 2015-06-11
Supplement: Supplementary file 56 [file cp-11-869-2015-supplement.zip]

Sample 2.5

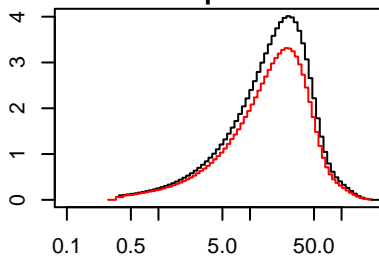

Sample 2.5 cumulative

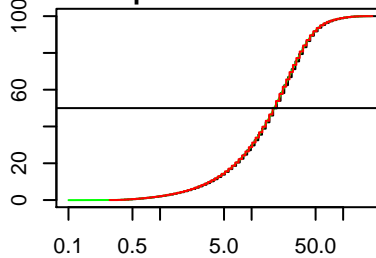

```
Sample statistics
Mass conserved = 1
Median(obs/new) = 17.6 / 17.71
1%(obs/new) = 0.68 / 0.67
5%(obs/new) = 1.88 / 1.91
25%(obs/new) = 8.35 / 8.21
75%(obs/new) = 30.8 / 29.56
95%(obs/new) = 59.17 / 58.48
99%(obs/new) = 94.34 / 97.56
```

Sample 7.5

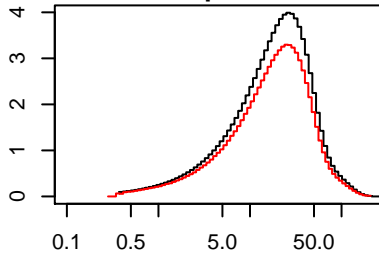

Sample 7.5 cumulative

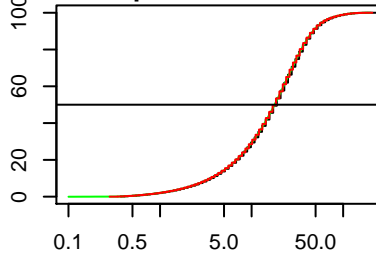

```
Sample statistics
Mass conserved = 1
Median(obs/new) = 17.6 / 17.71
1%(obs/new) = 0.68 / 0.67
5%(obs/new) = 1.88 / 1.91
25%(obs/new) = 8.35 / 8.21
75%(obs/new) = 30.8 / 32.19
95%(obs/new) = 59.17 / 58.48
99%(obs/new) = 103.56 / 97.56
```

Sample 12.5

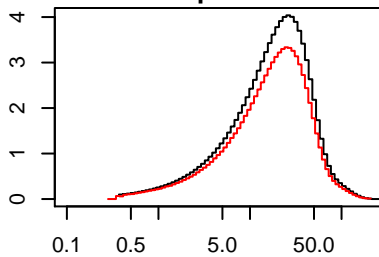

Sample 12.5 cumulative

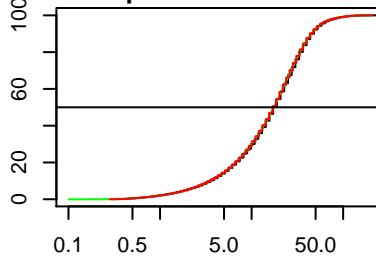

```
Sample statistics
Mass conserved = 1
Median(obs/new) = 17.6 / 17.71
1%(obs/new) = 0.68 / 0.67
5%(obs/new) = 1.88 / 1.91
25%(obs/new) = 8.35 / 8.21
75%(obs/new) = 30.8 / 29.56
95%(obs/new) = 59.17 / 58.48
99%(obs/new) = 94.34 / 97.56
```

Sample 15

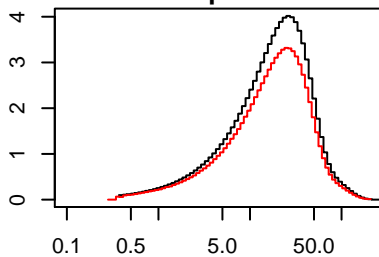

Sample 15 cumulative

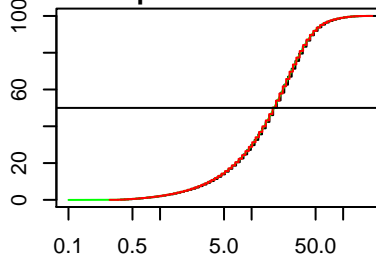

```
Sample statistics
Mass conserved = 1
Median(obs/new) = 17.6 / 17.71
1%(obs/new) = 0.68 / 0.67
5%(obs/new) = 1.88 / 1.91
25%(obs/new) = 8.35 / 8.21
75%(obs/new) = 30.8 / 29.56
95%(obs/new) = 59.17 / 58.48
99%(obs/new) = 94.34 / 97.56
```

Sample 17.5

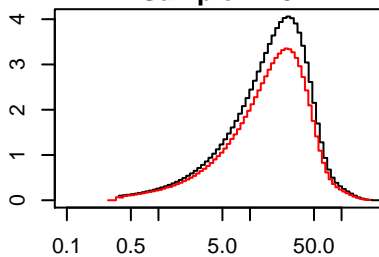

Sample 17.5 cumulative

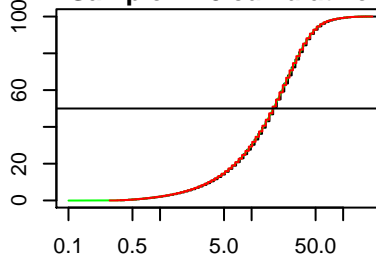

```
Sample statistics
Mass conserved = 1
Median(obs/new) = 17.6 / 17.71
1%(obs/new) = 0.68 / 0.67
5%(obs/new) = 1.88 / 1.91
25%(obs/new) = 8.35 / 8.21
75%(obs/new) = 30.8 / 29.56
95%(obs/new) = 53.91 / 53.7
99%(obs/new) = 94.34 / 89.58
```

Sample 22.5

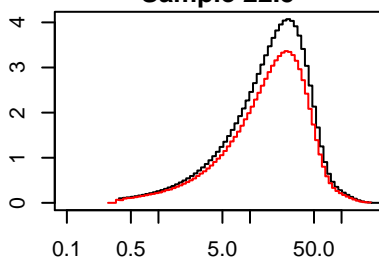

Sample 22.5 cumulative

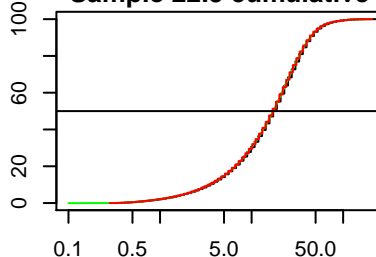

```
Sample statistics
Mass conserved = 1
Median(obs/new) = 17.6 / 17.71
1%(obs/new) = 0.68 / 0.67
5%(obs/new) = 1.88 / 1.91
25%(obs/new) = 8.35 / 8.21
75%(obs/new) = 30.8 / 29.56
95%(obs/new) = 53.91 / 53.7
99%(obs/new) = 85.94 / 89.58
```

Sample 27.5

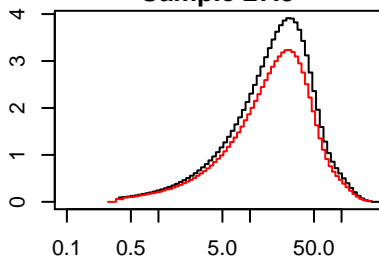

Sample 27.5 cumulative

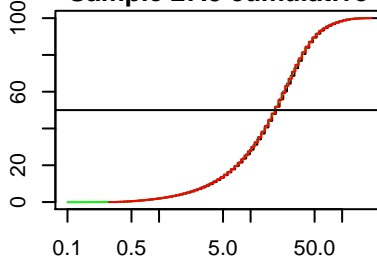

Sample statistics  
 Mass conserved = 1  
 Median(obs/new) = 19.32 / 19.29  
 1%(obs/new) = 0.68 / 0.67  
 5%(obs/new) = 2.06 / 2.08  
 25%(obs/new) = 9.16 / 8.94  
 75%(obs/new) = 33.82 / 32.19  
 95%(obs/new) = 64.96 / 69.36  
 99%(obs/new) = 113.7 / 106.24

Sample 32.5

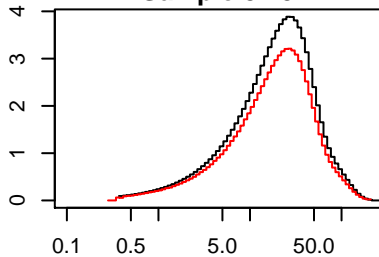

Sample 32.5 cumulative

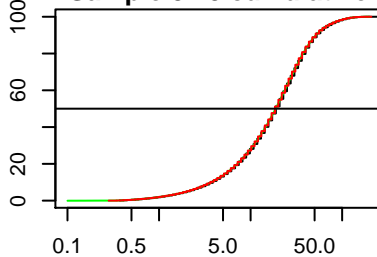

Sample statistics  
 Mass conserved = 1  
 Median(obs/new) = 19.32 / 19.29  
 1%(obs/new) = 0.68 / 0.67  
 5%(obs/new) = 2.06 / 2.08  
 25%(obs/new) = 9.16 / 8.94  
 75%(obs/new) = 33.82 / 32.19  
 95%(obs/new) = 71.31 / 69.36  
 99%(obs/new) = 113.7 / 115.7

Sample 35

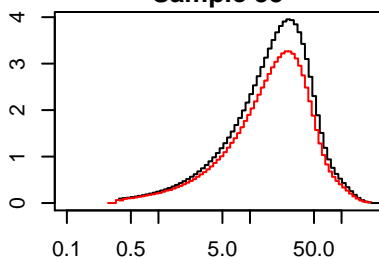

Sample 35 cumulative

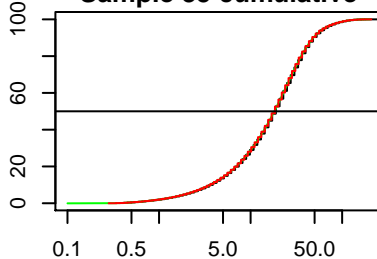

Sample statistics  
 Mass conserved = 1  
 Median(obs/new) = 17.6 / 17.71  
 1%(obs/new) = 0.68 / 0.67  
 5%(obs/new) = 2.06 / 1.91  
 25%(obs/new) = 8.35 / 8.94  
 75%(obs/new) = 30.8 / 32.19  
 95%(obs/new) = 64.96 / 63.69  
 99%(obs/new) = 103.56 / 106.24

Sample 37.5

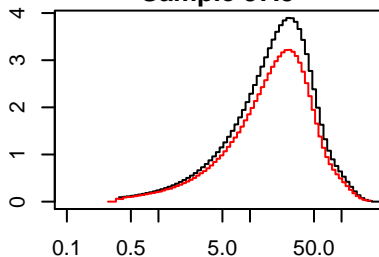

Sample 37.5 cumulative

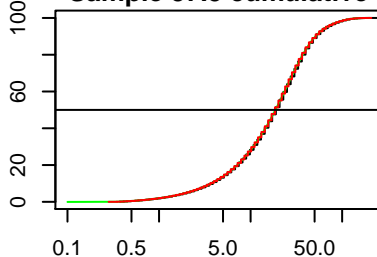

Sample statistics  
 Mass conserved = 1  
 Median(obs/new) = 19.32 / 19.29  
 1%(obs/new) = 0.68 / 0.67  
 5%(obs/new) = 2.06 / 2.08  
 25%(obs/new) = 9.16 / 8.94  
 75%(obs/new) = 33.82 / 32.19  
 95%(obs/new) = 64.96 / 69.36  
 99%(obs/new) = 113.7 / 115.7

Sample 42.5

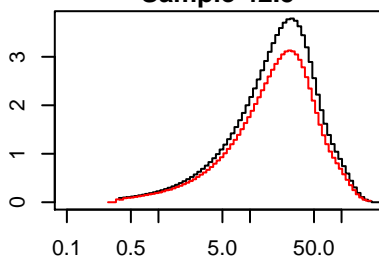

Sample 42.5 cumulative

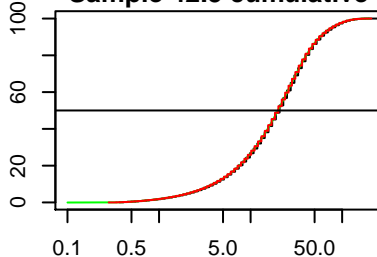

Sample statistics  
 Mass conserved = 1  
 Median(obs/new) = 19.32 / 19.29  
 1%(obs/new) = 0.68 / 0.73  
 5%(obs/new) = 2.06 / 2.08  
 25%(obs/new) = 9.16 / 9.74  
 75%(obs/new) = 37.12 / 35.05  
 95%(obs/new) = 78.28 / 75.53  
 99%(obs/new) = 113.7 / 115.7

Sample 52.5

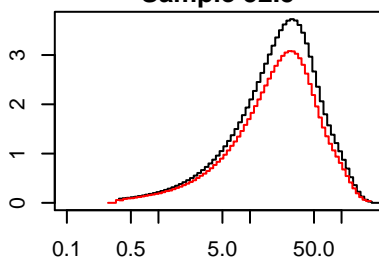

Sample 52.5 cumulative

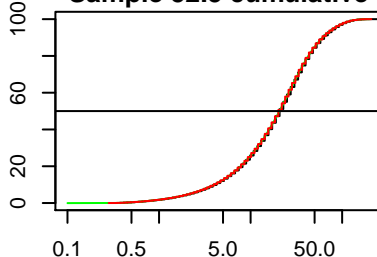

Sample statistics  
 Mass conserved = 1  
 Median(obs/new) = 21.21 / 21.01  
 1%(obs/new) = 0.74 / 0.73  
 5%(obs/new) = 2.26 / 2.27  
 25%(obs/new) = 10.06 / 9.74  
 75%(obs/new) = 37.12 / 38.18  
 95%(obs/new) = 78.28 / 82.26  
 99%(obs/new) = 124.77 / 126

**Sample 55**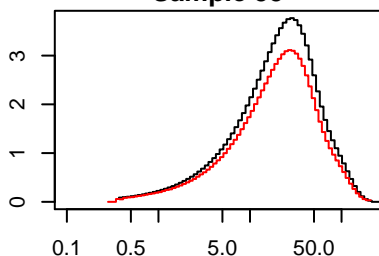**Sample 55 cumulative**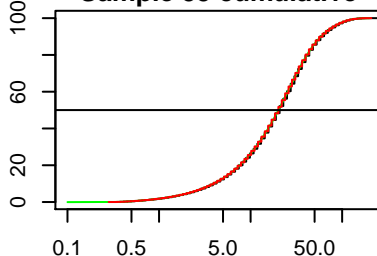

Sample statistics  
 Mass conserved = 1  
 Median(obs/new) = 19.32 / 21.01  
 1%(obs/new) = 0.74 / 0.73  
 5%(obs/new) = 2.06 / 2.08  
 25%(obs/new) = 9.16 / 9.74  
 75%(obs/new) = 37.12 / 35.05  
 95%(obs/new) = 78.28 / 82.26  
 99%(obs/new) = 124.77 / 115.7

**Sample 57.5**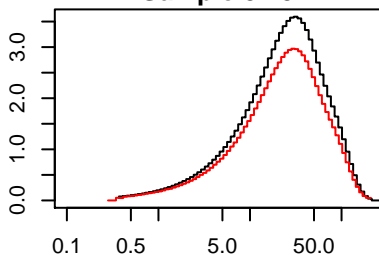**Sample 57.5 cumulative**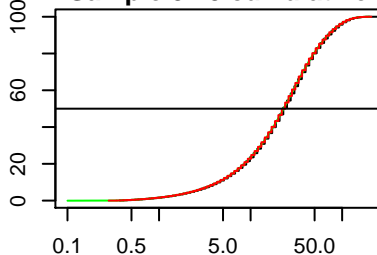

Sample statistics  
 Mass conserved = 1  
 Median(obs/new) = 23.29 / 22.88  
 1%(obs/new) = 0.74 / 0.73  
 5%(obs/new) = 2.26 / 2.27  
 25%(obs/new) = 11.04 / 10.61  
 75%(obs/new) = 40.75 / 41.58  
 95%(obs/new) = 94.34 / 89.58  
 99%(obs/new) = 124.77 / 126

**Sample 62.5**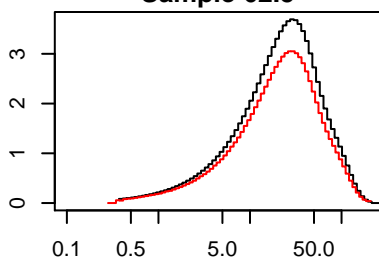**Sample 62.5 cumulative**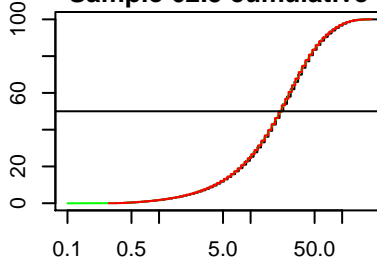

Sample statistics  
 Mass conserved = 1  
 Median(obs/new) = 21.21 / 21.01  
 1%(obs/new) = 0.74 / 0.73  
 5%(obs/new) = 2.26 / 2.27  
 25%(obs/new) = 10.06 / 9.74  
 75%(obs/new) = 37.12 / 38.18  
 95%(obs/new) = 85.94 / 82.26  
 99%(obs/new) = 124.77 / 126

**Sample 65**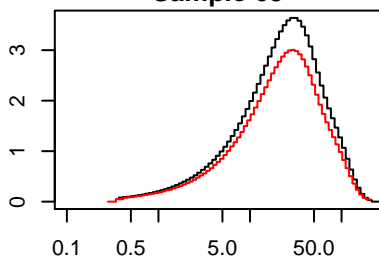**Sample 65 cumulative**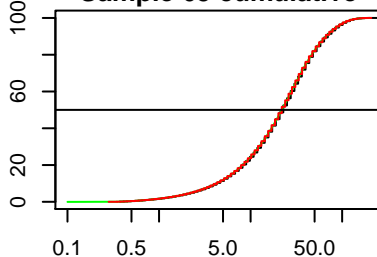

Sample statistics  
 Mass conserved = 1  
 Median(obs/new) = 21.21 / 22.88  
 1%(obs/new) = 0.74 / 0.73  
 5%(obs/new) = 2.26 / 2.27  
 25%(obs/new) = 10.06 / 10.61  
 75%(obs/new) = 40.75 / 41.58  
 95%(obs/new) = 85.94 / 89.58  
 99%(obs/new) = 124.77 / 126

**Sample 67.5**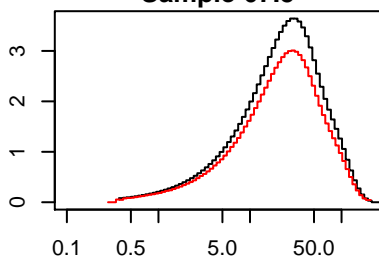**Sample 67.5 cumulative**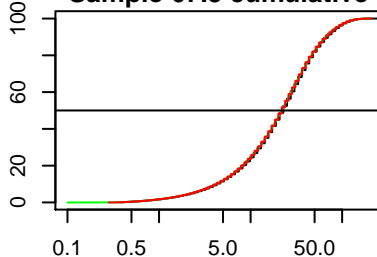

Sample statistics  
 Mass conserved = 1  
 Median(obs/new) = 21.21 / 21.01  
 1%(obs/new) = 0.74 / 0.73  
 5%(obs/new) = 2.26 / 2.27  
 25%(obs/new) = 10.06 / 10.61  
 75%(obs/new) = 40.75 / 41.58  
 95%(obs/new) = 85.94 / 89.58  
 99%(obs/new) = 124.77 / 126

**Sample 72.5**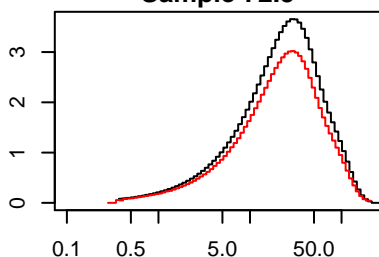**Sample 72.5 cumulative**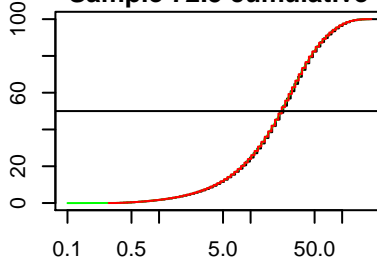

Sample statistics  
 Mass conserved = 1  
 Median(obs/new) = 21.21 / 21.01  
 1%(obs/new) = 0.74 / 0.73  
 5%(obs/new) = 2.26 / 2.27  
 25%(obs/new) = 10.06 / 10.61  
 75%(obs/new) = 40.75 / 38.18  
 95%(obs/new) = 85.94 / 89.58  
 99%(obs/new) = 124.77 / 126

Sample 77.5

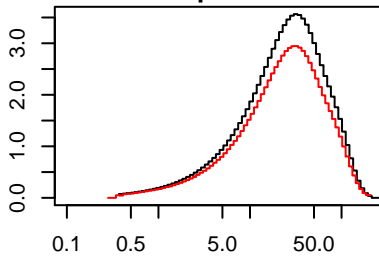

Sample 77.5 cumulative

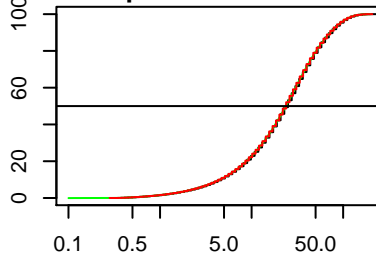

Sample statistics  
 Mass conserved = 1  
 Median(obs/new) = 23.29 / 22.88  
 1%(obs/new) = 0.74 / 0.73  
 5%(obs/new) = 2.49 / 2.47  
 25%(obs/new) = 11.04 / 10.61  
 75%(obs/new) = 44.74 / 45.28  
 95%(obs/new) = 94.34 / 89.58  
 99%(obs/new) = 124.77 / 126

Sample 82.5

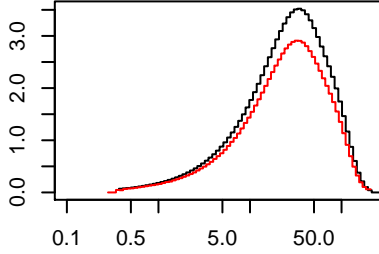

Sample 82.5 cumulative

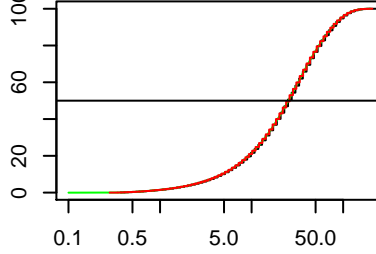

Sample statistics  
 Mass conserved = 1  
 Median(obs/new) = 25.56 / 24.92  
 1%(obs/new) = 0.81 / 0.8  
 5%(obs/new) = 2.49 / 2.47  
 25%(obs/new) = 12.12 / 11.56  
 75%(obs/new) = 49.11 / 45.28  
 95%(obs/new) = 94.34 / 97.56  
 99%(obs/new) = 136.97 / 137.21

5/25/50/75/95 percentiles

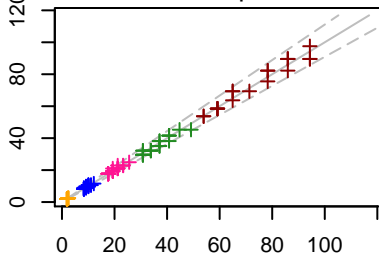

OC437-07-GC68 percentiles

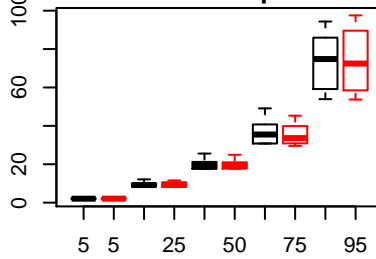

Site statistics  
 Percentiles Pearson's corr. = 0.975  
 Mean normalized bias = 0
