# Supplementary material for: Twelve thousand years of dust: the Holocene global dust cycle constrained by natural archives
Source: Copernicus journal article supplement (doi:10.5194/cp-11-869-2015), 2015-06-11
Supplement: Supplementary file 58 [file cp-11-869-2015-supplement.zip]

Sample 104.81

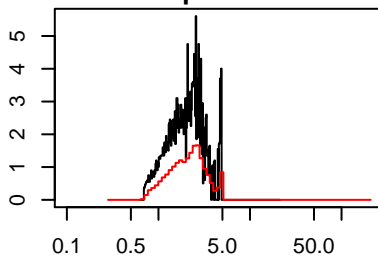

Sample 104.81 cumulative

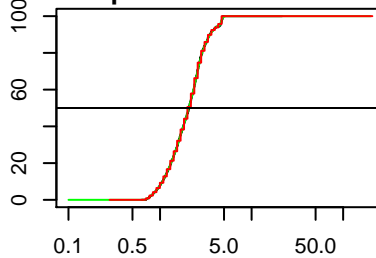

```
Sample statistics
Mass conserved = 1
Median(obs/new) = 2.06 / 2.08
1%(obs/new) = 0.75 / 0.73
5%(obs/new) = 0.91 / 0.87
25%(obs/new) = 1.44 / 1.47
75%(obs/new) = 2.72 / 2.7
95%(obs/new) = 4.47 / 4.51
99%(obs/new) = 4.79 / 4.91
```

Sample 105.52

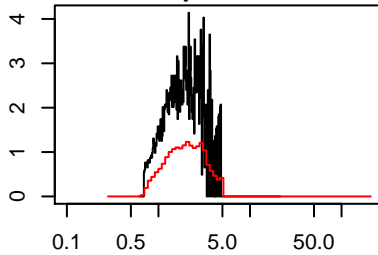

Sample 105.52 cumulative

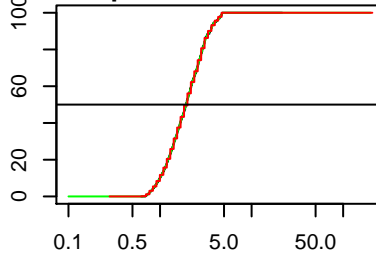

```
Sample statistics
Mass conserved = 1
Median(obs/new) = 1.92 / 1.91
1%(obs/new) = 0.73 / 0.73
5%(obs/new) = 0.86 / 0.87
25%(obs/new) = 1.34 / 1.35
75%(obs/new) = 2.72 / 2.7
95%(obs/new) = 4.06 / 4.14
99%(obs/new) = 4.73 / 4.91
```

Sample 106.65

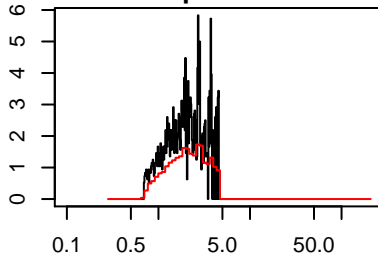

Sample 106.65 cumulative

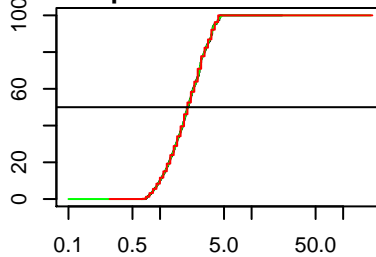

```
Sample statistics
Mass conserved = 1
Median(obs/new) = 2 / 2.08
1%(obs/new) = 0.73 / 0.73
5%(obs/new) = 0.86 / 0.87
25%(obs/new) = 1.38 / 1.35
75%(obs/new) = 2.79 / 2.94
95%(obs/new) = 4 / 4.14
99%(obs/new) = 4.47 / 4.51
```

Sample 107.75

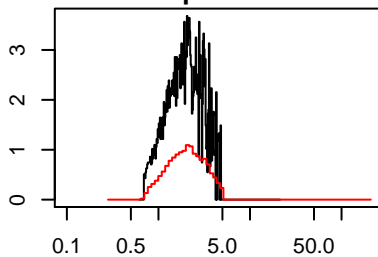

Sample 107.75 cumulative

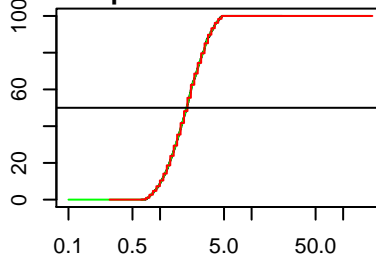

```
Sample statistics
Mass conserved = 1
Median(obs/new) = 1.95 / 1.91
1%(obs/new) = 0.74 / 0.73
5%(obs/new) = 0.88 / 0.87
25%(obs/new) = 1.38 / 1.35
75%(obs/new) = 2.72 / 2.7
95%(obs/new) = 3.95 / 4.14
99%(obs/new) = 4.54 / 4.51
```

Sample 109.26

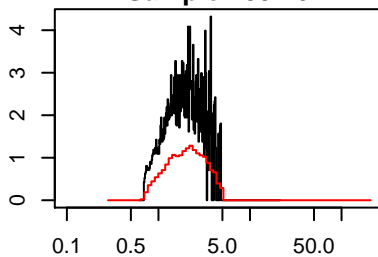

Sample 109.26 cumulative

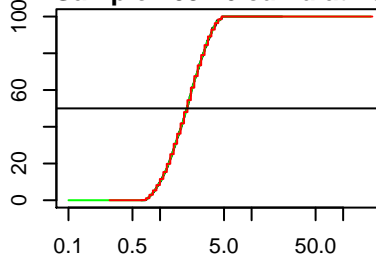

```
Sample statistics
Mass conserved = 1
Median(obs/new) = 1.97 / 1.91
1%(obs/new) = 0.73 / 0.73
5%(obs/new) = 0.87 / 0.87
25%(obs/new) = 1.36 / 1.35
75%(obs/new) = 2.75 / 2.7
95%(obs/new) = 3.95 / 4.14
99%(obs/new) = 4.73 / 4.51
```

Sample 111.6

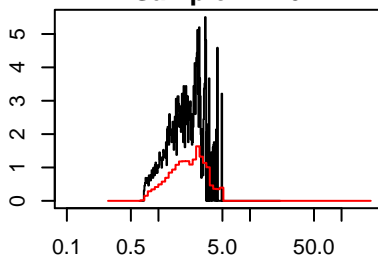

Sample 111.6 cumulative

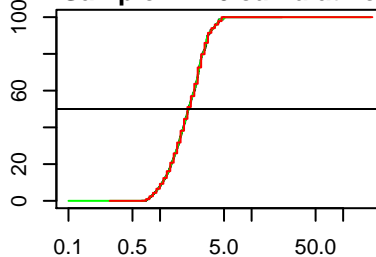

```
Sample statistics
Mass conserved = 1
Median(obs/new) = 2.06 / 2.08
1%(obs/new) = 0.74 / 0.73
5%(obs/new) = 0.9 / 0.87
25%(obs/new) = 1.46 / 1.47
75%(obs/new) = 2.75 / 2.7
95%(obs/new) = 3.95 / 4.14
99%(obs/new) = 4.41 / 4.91
```

Sample 112.55

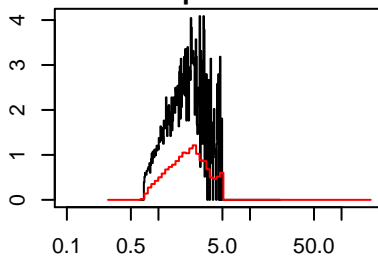

Sample 112.55 cumulative

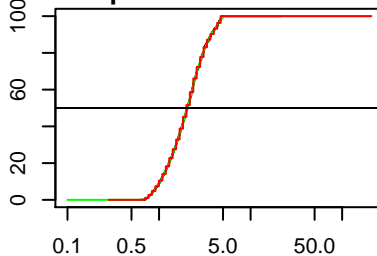

Sample statistics  
 Mass conserved = 1  
 Median(obs/new) = 2.06 / 2.08  
 1%(obs/new) = 0.74 / 0.73  
 5%(obs/new) = 0.88 / 0.87  
 25%(obs/new) = 1.42 / 1.35  
 75%(obs/new) = 2.79 / 2.7  
 95%(obs/new) = 4.35 / 4.51  
 99%(obs/new) = 4.86 / 4.91

Sample 113.14

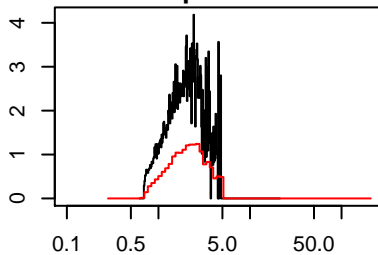

Sample 113.14 cumulative

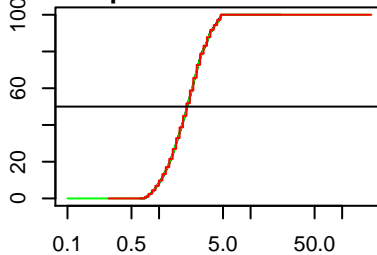

Sample statistics  
 Mass conserved = 1  
 Median(obs/new) = 2.03 / 2.08  
 1%(obs/new) = 0.74 / 0.73  
 5%(obs/new) = 0.9 / 0.87  
 25%(obs/new) = 1.44 / 1.47  
 75%(obs/new) = 2.75 / 2.7  
 95%(obs/new) = 4.23 / 4.14  
 99%(obs/new) = 4.73 / 4.91

Sample 114.67

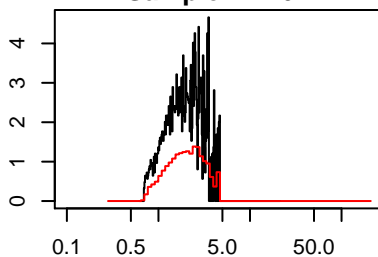

Sample 114.67 cumulative

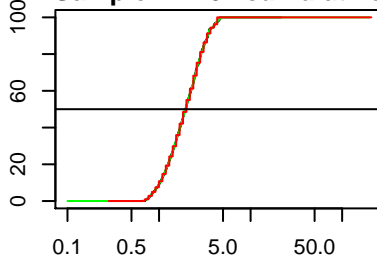

Sample statistics  
 Mass conserved = 1  
 Median(obs/new) = 1.95 / 1.91  
 1%(obs/new) = 0.74 / 0.73  
 5%(obs/new) = 0.87 / 0.87  
 25%(obs/new) = 1.36 / 1.35  
 75%(obs/new) = 2.72 / 2.7  
 95%(obs/new) = 3.89 / 3.8  
 99%(obs/new) = 4.6 / 4.51

Sample 115.21

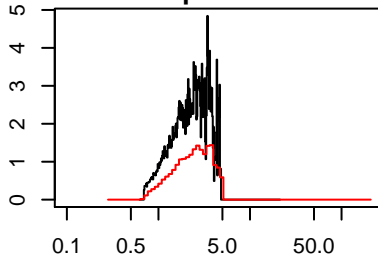

Sample 115.21 cumulative

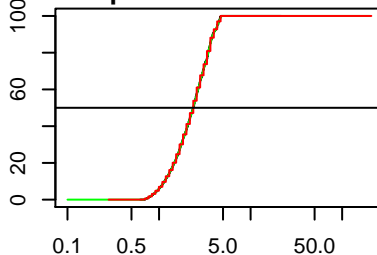

Sample statistics  
 Mass conserved = 1  
 Median(obs/new) = 2.36 / 2.27  
 1%(obs/new) = 0.76 / 0.73  
 5%(obs/new) = 0.96 / 0.95  
 25%(obs/new) = 1.63 / 1.61  
 75%(obs/new) = 3.21 / 3.2  
 95%(obs/new) = 4.35 / 4.51  
 99%(obs/new) = 4.66 / 4.91

Sample 117.13

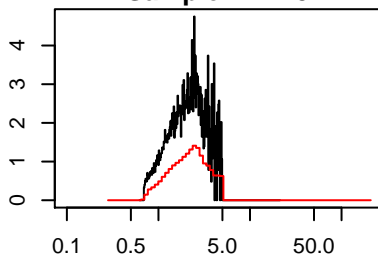

Sample 117.13 cumulative

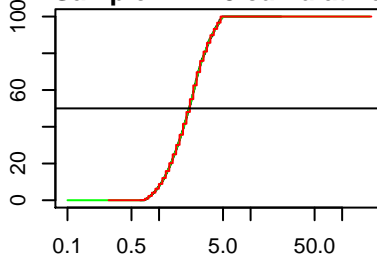

Sample statistics  
 Mass conserved = 1  
 Median(obs/new) = 2.12 / 2.08  
 1%(obs/new) = 0.75 / 0.73  
 5%(obs/new) = 0.91 / 0.87  
 25%(obs/new) = 1.48 / 1.47  
 75%(obs/new) = 2.87 / 2.94  
 95%(obs/new) = 4.29 / 4.51  
 99%(obs/new) = 4.79 / 4.91

Sample 117.76

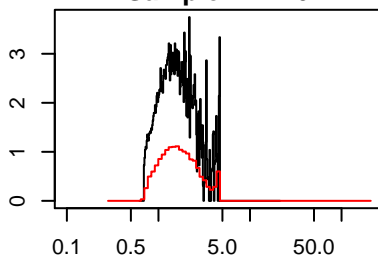

Sample 117.76 cumulative

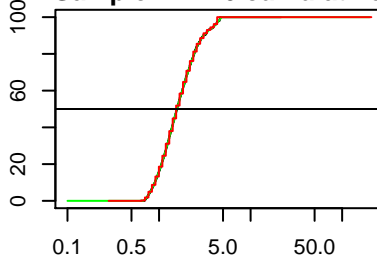

Sample statistics  
 Mass conserved = 1  
 Median(obs/new) = 1.56 / 1.61  
 1%(obs/new) = 0.72 / 0.67  
 5%(obs/new) = 0.8 / 0.8  
 25%(obs/new) = 1.15 / 1.14  
 75%(obs/new) = 2.24 / 2.27  
 95%(obs/new) = 3.95 / 3.8  
 99%(obs/new) = 4.6 / 4.51

Sample 119.23

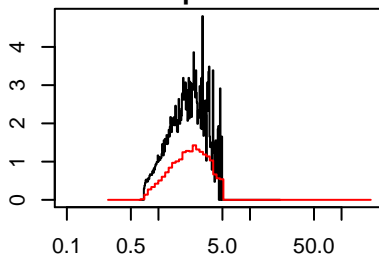

Sample 119.23 cumulative

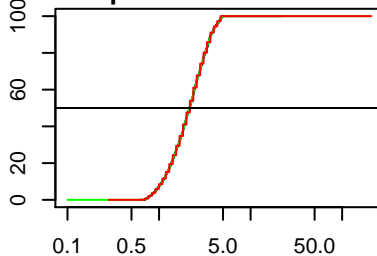

Sample statistics  
 Mass conserved = 1  
 Median(obs/new) = 2.15 / 2.08  
 1%(obs/new) = 0.75 / 0.73  
 5%(obs/new) = 0.92 / 0.95  
 25%(obs/new) = 1.5 / 1.47  
 75%(obs/new) = 2.99 / 2.94  
 95%(obs/new) = 4.23 / 4.14  
 99%(obs/new) = 4.73 / 4.91

Sample 119.76

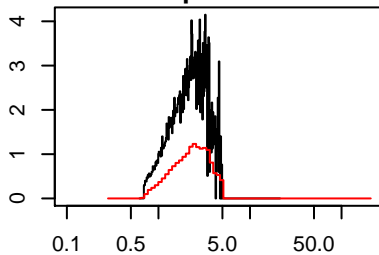

Sample 119.76 cumulative

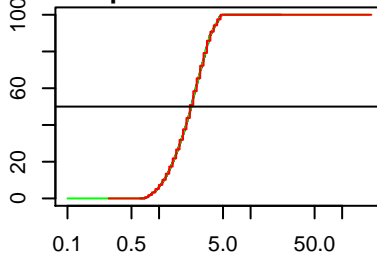

Sample statistics  
 Mass conserved = 1  
 Median(obs/new) = 2.27 / 2.27  
 1%(obs/new) = 0.76 / 0.73  
 5%(obs/new) = 0.95 / 0.95  
 25%(obs/new) = 1.56 / 1.61  
 75%(obs/new) = 3.03 / 2.94  
 95%(obs/new) = 4.17 / 4.14  
 99%(obs/new) = 4.6 / 4.91

Sample 121.48

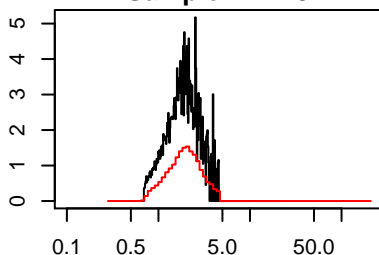

Sample 121.48 cumulative

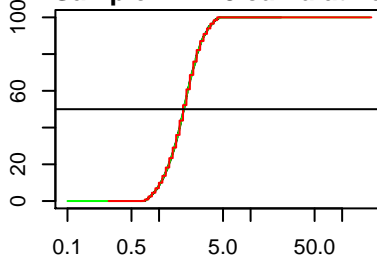

Sample statistics  
 Mass conserved = 1  
 Median(obs/new) = 1.87 / 1.91  
 1%(obs/new) = 0.74 / 0.73  
 5%(obs/new) = 0.9 / 0.87  
 25%(obs/new) = 1.4 / 1.35  
 75%(obs/new) = 2.46 / 2.47  
 95%(obs/new) = 3.53 / 3.49  
 99%(obs/new) = 4.23 / 4.14

Sample 122.08

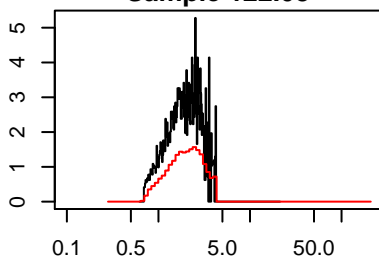

Sample 122.08 cumulative

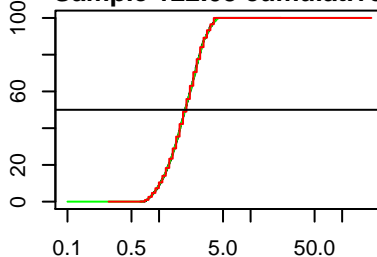

Sample statistics  
 Mass conserved = 1  
 Median(obs/new) = 1.92 / 1.91  
 1%(obs/new) = 0.74 / 0.73  
 5%(obs/new) = 0.88 / 0.87  
 25%(obs/new) = 1.4 / 1.35  
 75%(obs/new) = 2.61 / 2.7  
 95%(obs/new) = 3.58 / 3.8  
 99%(obs/new) = 4.17 / 4.14

Sample 123.08

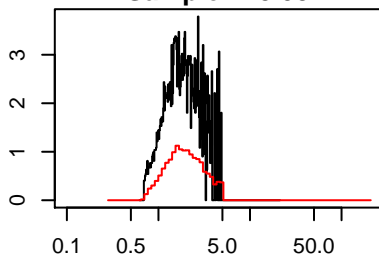

Sample 123.08 cumulative

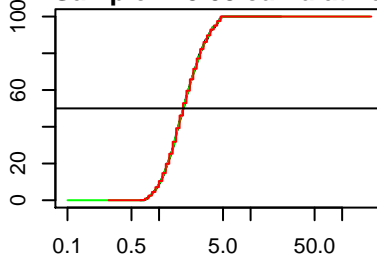

Sample statistics  
 Mass conserved = 1  
 Median(obs/new) = 1.84 / 1.91  
 1%(obs/new) = 0.74 / 0.73  
 5%(obs/new) = 0.9 / 0.87  
 25%(obs/new) = 1.34 / 1.35  
 75%(obs/new) = 2.61 / 2.7  
 95%(obs/new) = 4.12 / 4.14  
 99%(obs/new) = 4.73 / 4.91

Sample 124.08

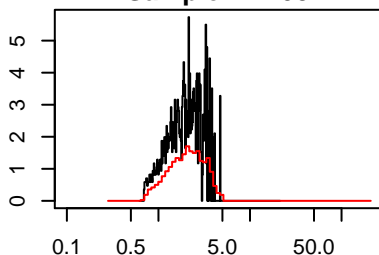

Sample 124.08 cumulative

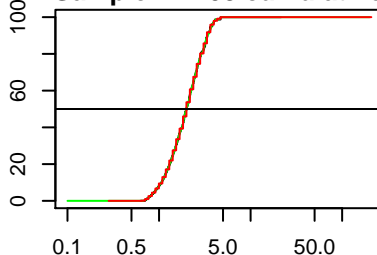

Sample statistics  
 Mass conserved = 1  
 Median(obs/new) = 2 / 2.08  
 1%(obs/new) = 0.74 / 0.73  
 5%(obs/new) = 0.9 / 0.87  
 25%(obs/new) = 1.42 / 1.47  
 75%(obs/new) = 2.72 / 2.7  
 95%(obs/new) = 3.74 / 3.8  
 99%(obs/new) = 4.12 / 4.51

Sample 126.3

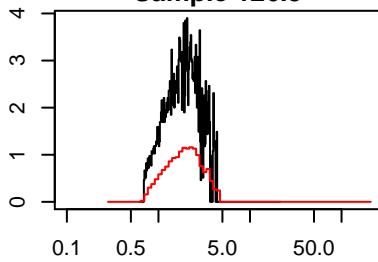

Sample 126.3 cumulative

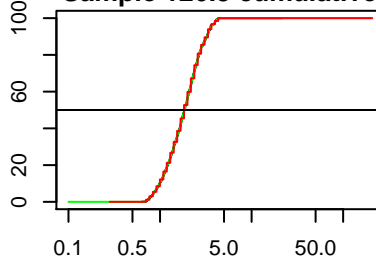

Sample statistics  
 Mass conserved = 1  
 Median(obs/new) = 1.84 / 1.91  
 1%(obs/new) = 0.73 / 0.73  
 5%(obs/new) = 0.86 / 0.87  
 25%(obs/new) = 1.32 / 1.35  
 75%(obs/new) = 2.5 / 2.47  
 95%(obs/new) = 3.53 / 3.49  
 99%(obs/new) = 4.12 / 4.14

Sample 127.57

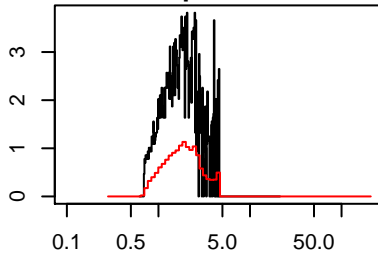

Sample 127.57 cumulative

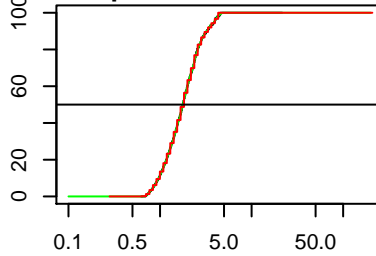

Sample statistics  
 Mass conserved = 1  
 Median(obs/new) = 1.77 / 1.75  
 1%(obs/new) = 0.73 / 0.73  
 5%(obs/new) = 0.85 / 0.87  
 25%(obs/new) = 1.27 / 1.24  
 75%(obs/new) = 2.4 / 2.47  
 95%(obs/new) = 3.95 / 3.8  
 99%(obs/new) = 4.47 / 4.51

Sample 128.09

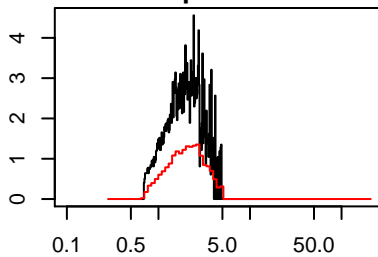

Sample 128.09 cumulative

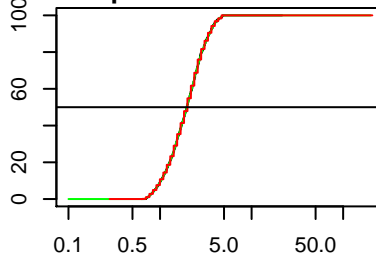

Sample statistics  
 Mass conserved = 1  
 Median(obs/new) = 1.97 / 1.91  
 1%(obs/new) = 0.74 / 0.73  
 5%(obs/new) = 0.88 / 0.87  
 25%(obs/new) = 1.4 / 1.35  
 75%(obs/new) = 2.68 / 2.7  
 95%(obs/new) = 3.89 / 3.8  
 99%(obs/new) = 4.66 / 4.51

Sample 129.5

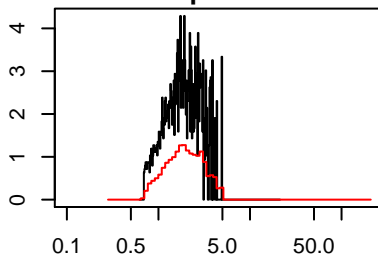

Sample 129.5 cumulative

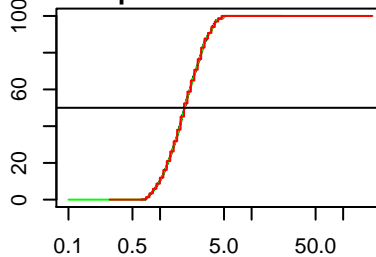

Sample statistics  
 Mass conserved = 1  
 Median(obs/new) = 1.87 / 1.91  
 1%(obs/new) = 0.72 / 0.73  
 5%(obs/new) = 0.85 / 0.87  
 25%(obs/new) = 1.32 / 1.35  
 75%(obs/new) = 2.64 / 2.7  
 95%(obs/new) = 3.79 / 3.8  
 99%(obs/new) = 4.35 / 4.51

Sample 130.08

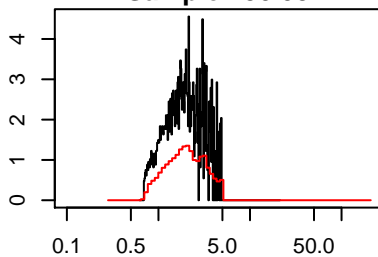

Sample 130.08 cumulative

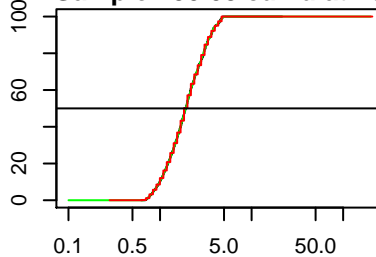

Sample statistics  
 Mass conserved = 1  
 Median(obs/new) = 1.92 / 1.91  
 1%(obs/new) = 0.73 / 0.73  
 5%(obs/new) = 0.85 / 0.87  
 25%(obs/new) = 1.34 / 1.35  
 75%(obs/new) = 2.79 / 2.7  
 95%(obs/new) = 4 / 4.14  
 99%(obs/new) = 4.73 / 4.91

Sample 131.96

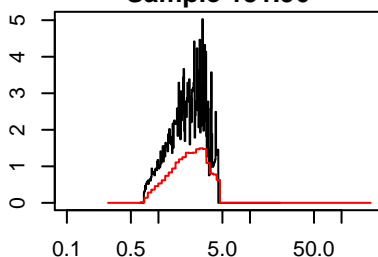

Sample 131.96 cumulative

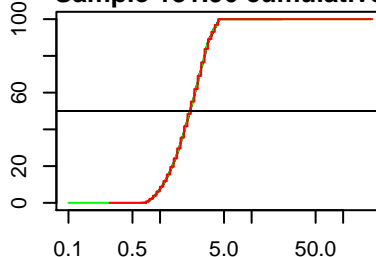

Sample statistics  
 Mass conserved = 1  
 Median(obs/new) = 2.12 / 2.08  
 1%(obs/new) = 0.75 / 0.73  
 5%(obs/new) = 0.91 / 0.87  
 25%(obs/new) = 1.5 / 1.47  
 75%(obs/new) = 2.87 / 2.94  
 95%(obs/new) = 3.95 / 4.14  
 99%(obs/new) = 4.35 / 4.51

Sample 132.45

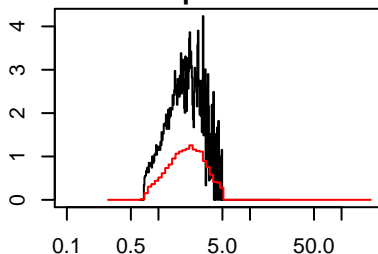

Sample 132.45 cumulative

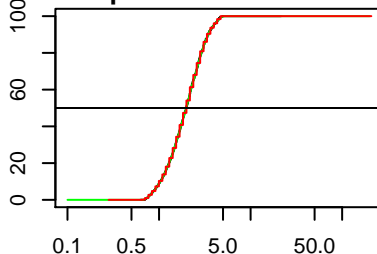

```
Sample statistics
Mass conserved = 1
Median(obs/new) = 1.97 / 1.91
1%(obs/new) = 0.74 / 0.73
5%(obs/new) = 0.88 / 0.87
25%(obs/new) = 1.4 / 1.35
75%(obs/new) = 2.72 / 2.7
95%(obs/new) = 3.95 / 4.14
99%(obs/new) = 4.6 / 4.51
```

Sample 133.45

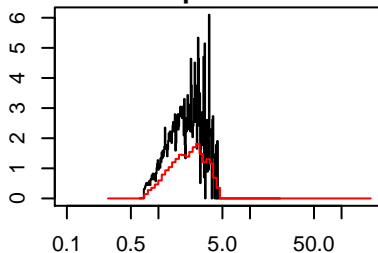

Sample 133.45 cumulative

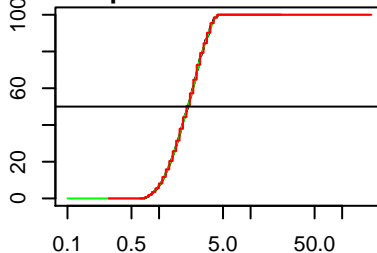

```
Sample statistics
Mass conserved = 1
Median(obs/new) = 2.09 / 2.08
1%(obs/new) = 0.75 / 0.73
5%(obs/new) = 0.95 / 0.95
25%(obs/new) = 1.46 / 1.47
75%(obs/new) = 2.75 / 2.7
95%(obs/new) = 3.74 / 3.8
99%(obs/new) = 4.29 / 4.14
```

Sample 134.45

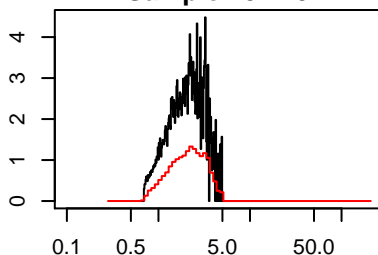

Sample 134.45 cumulative

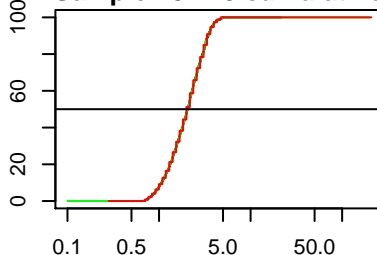

```
Sample statistics
Mass conserved = 1
Median(obs/new) = 2.06 / 2.08
1%(obs/new) = 0.75 / 0.73
5%(obs/new) = 0.91 / 0.87
25%(obs/new) = 1.44 / 1.47
75%(obs/new) = 2.79 / 2.7
95%(obs/new) = 3.79 / 3.8
99%(obs/new) = 4.47 / 4.51
```

Sample 136.02

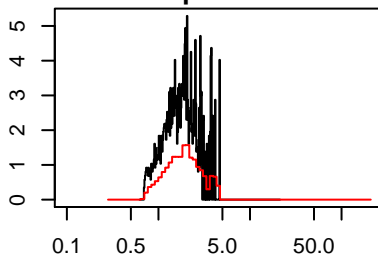

Sample 136.02 cumulative

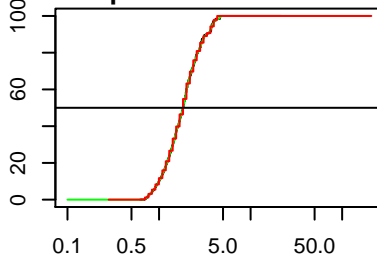

```
Sample statistics
Mass conserved = 1
Median(obs/new) = 1.82 / 1.75
1%(obs/new) = 0.73 / 0.73
5%(obs/new) = 0.87 / 0.87
25%(obs/new) = 1.32 / 1.35
75%(obs/new) = 2.46 / 2.47
95%(obs/new) = 3.79 / 3.8
99%(obs/new) = 4.17 / 4.51
```

Sample 137.42

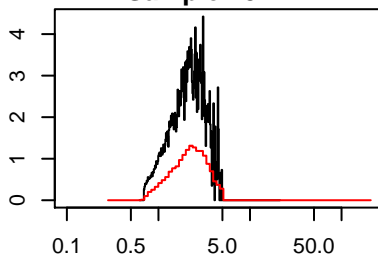

Sample 137.42 cumulative

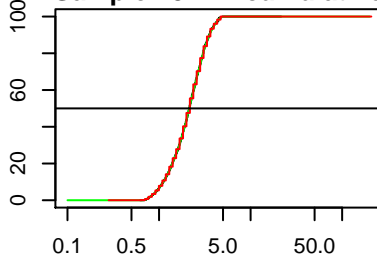

```
Sample statistics
Mass conserved = 1
Median(obs/new) = 2.15 / 2.08
1%(obs/new) = 0.76 / 0.73
5%(obs/new) = 0.95 / 0.95
25%(obs/new) = 1.54 / 1.47
75%(obs/new) = 2.83 / 2.94
95%(obs/new) = 3.95 / 4.14
99%(obs/new) = 4.54 / 4.51
```

Sample 137.48

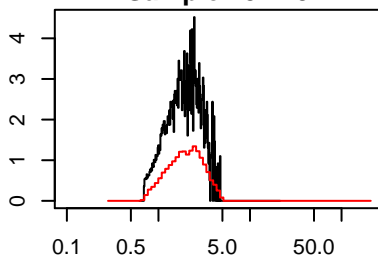

Sample 137.48 cumulative

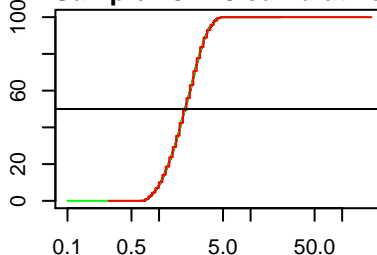

```
Sample statistics
Mass conserved = 1
Median(obs/new) = 1.92 / 1.91
1%(obs/new) = 0.74 / 0.73
5%(obs/new) = 0.9 / 0.87
25%(obs/new) = 1.38 / 1.35
75%(obs/new) = 2.61 / 2.7
95%(obs/new) = 3.74 / 3.8
99%(obs/new) = 4.23 / 4.51
```

Sample 138.48

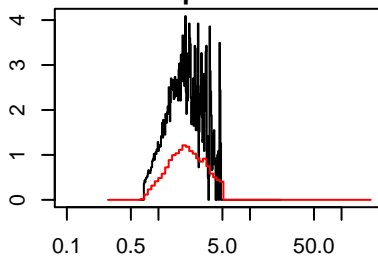

Sample 138.48 cumulative

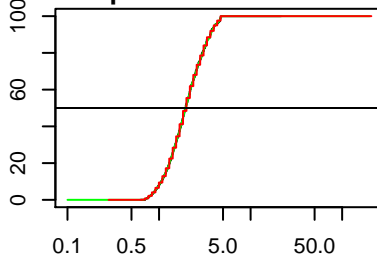

```

Sample statistics
Mass conserved = 1
Median(obs/new) = 1.95 / 1.91
1%(obs/new) = 0.75 / 0.73
5%(obs/new) = 0.91 / 0.87
25%(obs/new) = 1.4 / 1.35
75%(obs/new) = 2.75 / 2.7
95%(obs/new) = 4.06 / 4.14
99%(obs/new) = 4.66 / 4.91

```

Sample 140.32

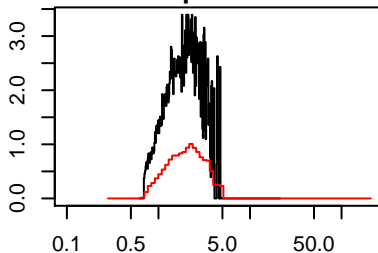

Sample 140.32 cumulative

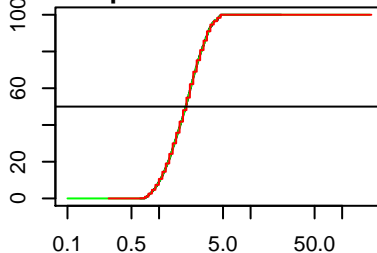

```

Sample statistics
Mass conserved = 1
Median(obs/new) = 1.95 / 1.91
1%(obs/new) = 0.74 / 0.73
5%(obs/new) = 0.88 / 0.87
25%(obs/new) = 1.38 / 1.35
75%(obs/new) = 2.68 / 2.7
95%(obs/new) = 3.79 / 3.8
99%(obs/new) = 4.54 / 4.51

```

Sample 140.96

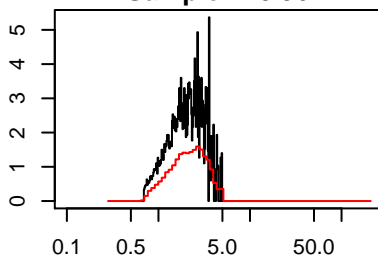

Sample 140.96 cumulative

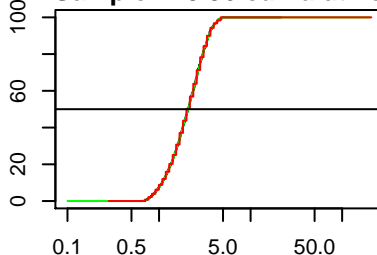

```

Sample statistics
Mass conserved = 1
Median(obs/new) = 2.09 / 2.08
1%(obs/new) = 0.75 / 0.73
5%(obs/new) = 0.92 / 0.87
25%(obs/new) = 1.48 / 1.47
75%(obs/new) = 2.79 / 2.94
95%(obs/new) = 3.89 / 3.8
99%(obs/new) = 4.47 / 4.51

```

Sample 141.48

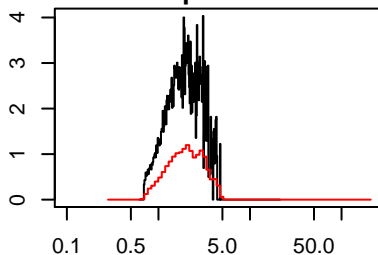

Sample 141.48 cumulative

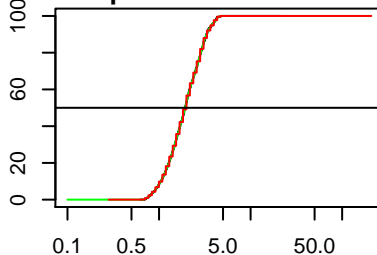

```

Sample statistics
Mass conserved = 1
Median(obs/new) = 1.92 / 1.91
1%(obs/new) = 0.74 / 0.73
5%(obs/new) = 0.9 / 0.87
25%(obs/new) = 1.38 / 1.35
75%(obs/new) = 2.68 / 2.7
95%(obs/new) = 3.79 / 3.8
99%(obs/new) = 4.29 / 4.51

```

Sample 142.55

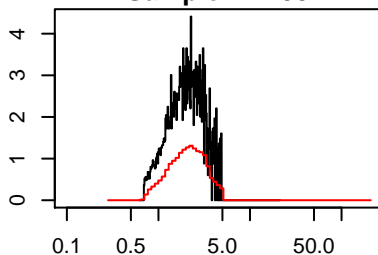

Sample 142.55 cumulative

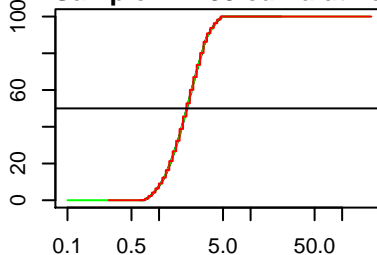

```

Sample statistics
Mass conserved = 1
Median(obs/new) = 2 / 2.08
1%(obs/new) = 0.74 / 0.73
5%(obs/new) = 0.91 / 0.87
25%(obs/new) = 1.44 / 1.47
75%(obs/new) = 2.75 / 2.7
95%(obs/new) = 3.95 / 3.8
99%(obs/new) = 4.6 / 4.51

```

Sample 143.48

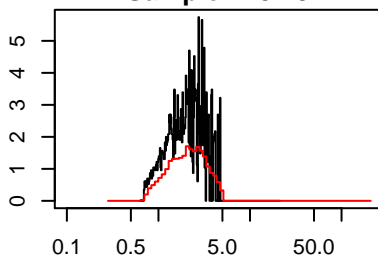

Sample 143.48 cumulative

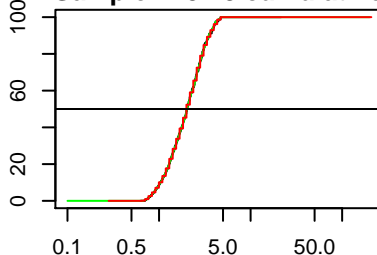

```

Sample statistics
Mass conserved = 1
Median(obs/new) = 2.03 / 2.08
1%(obs/new) = 0.74 / 0.73
5%(obs/new) = 0.9 / 0.87
25%(obs/new) = 1.4 / 1.35
75%(obs/new) = 2.79 / 2.7
95%(obs/new) = 4 / 4.14
99%(obs/new) = 4.47 / 4.51

```

Sample 144.48

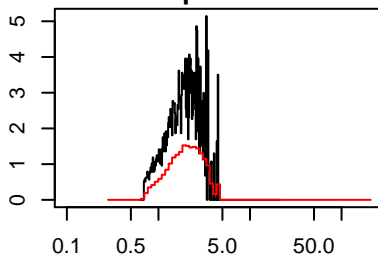

Sample 144.48 cumulative

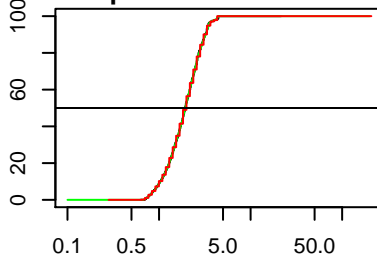

```
Sample statistics
Mass conserved = 1
Median(obs/new) = 1.92 / 1.91
1%(obs/new) = 0.74 / 0.73
5%(obs/new) = 0.87 / 0.87
25%(obs/new) = 1.4 / 1.35
75%(obs/new) = 2.61 / 2.7
95%(obs/new) = 3.44 / 3.49
99%(obs/new) = 4.35 / 4.51
```

Sample 145.48

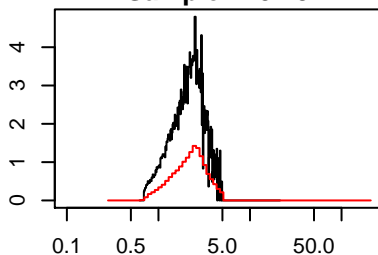

Sample 145.48 cumulative

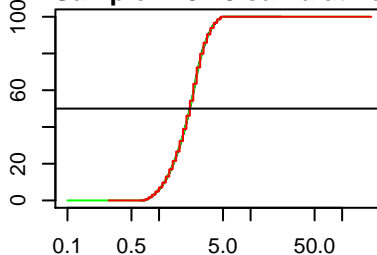

```
Sample statistics
Mass conserved = 1
Median(obs/new) = 2.18 / 2.08
1%(obs/new) = 0.76 / 0.73
5%(obs/new) = 0.96 / 0.95
25%(obs/new) = 1.56 / 1.61
75%(obs/new) = 2.75 / 2.7
95%(obs/new) = 3.84 / 3.8
99%(obs/new) = 4.6 / 4.51
```

Sample 146.49

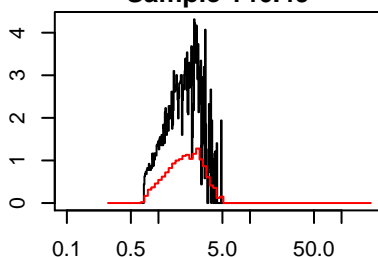

Sample 146.49 cumulative

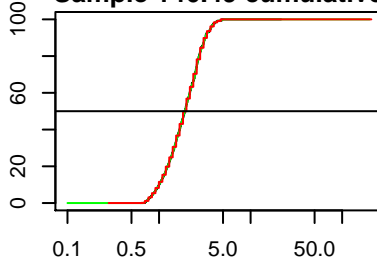

```
Sample statistics
Mass conserved = 1
Median(obs/new) = 1.92 / 1.91
1%(obs/new) = 0.73 / 0.73
5%(obs/new) = 0.86 / 0.87
25%(obs/new) = 1.36 / 1.35
75%(obs/new) = 2.61 / 2.7
95%(obs/new) = 3.68 / 3.8
99%(obs/new) = 4.35 / 4.51
```

Sample 148.48

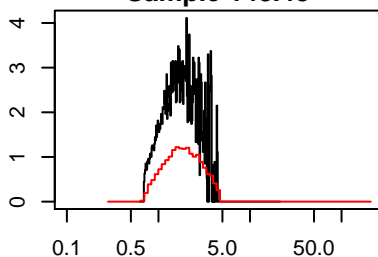

Sample 148.48 cumulative

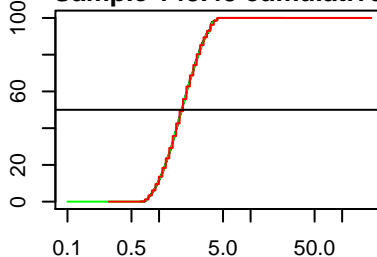

```
Sample statistics
Mass conserved = 1
Median(obs/new) = 1.77 / 1.75
1%(obs/new) = 0.73 / 0.73
5%(obs/new) = 0.85 / 0.87
25%(obs/new) = 1.27 / 1.24
75%(obs/new) = 2.46 / 2.47
95%(obs/new) = 3.68 / 3.8
99%(obs/new) = 4.12 / 4.14
```

Sample 149.92

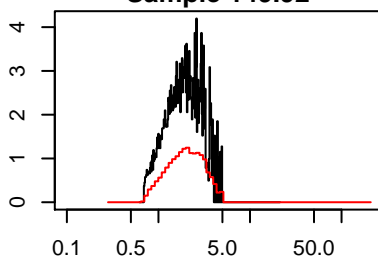

Sample 149.92 cumulative

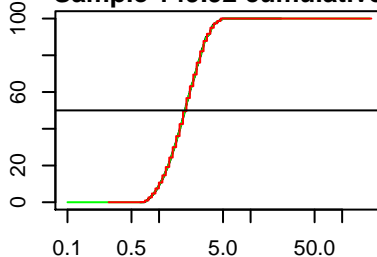

```
Sample statistics
Mass conserved = 1
Median(obs/new) = 1.92 / 1.91
1%(obs/new) = 0.74 / 0.73
5%(obs/new) = 0.88 / 0.87
25%(obs/new) = 1.36 / 1.35
75%(obs/new) = 2.64 / 2.7
95%(obs/new) = 3.74 / 3.8
99%(obs/new) = 4.6 / 4.51
```

Sample 150.9

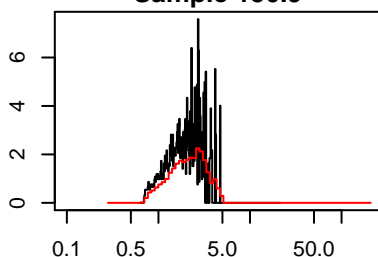

Sample 150.9 cumulative

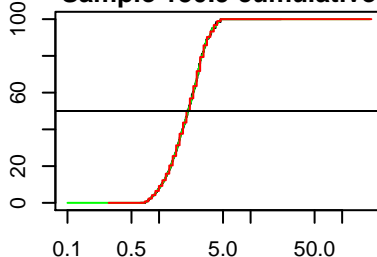

```
Sample statistics
Mass conserved = 1
Median(obs/new) = 2.09 / 2.08
1%(obs/new) = 0.75 / 0.73
5%(obs/new) = 0.91 / 0.87
25%(obs/new) = 1.46 / 1.47
75%(obs/new) = 2.75 / 2.7
95%(obs/new) = 3.95 / 3.8
99%(obs/new) = 4.23 / 4.51
```

Sample 152

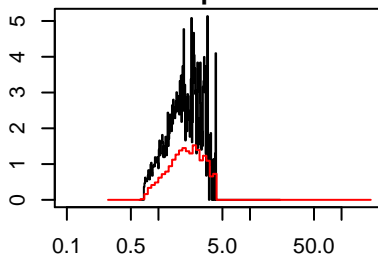

Sample 152 cumulative

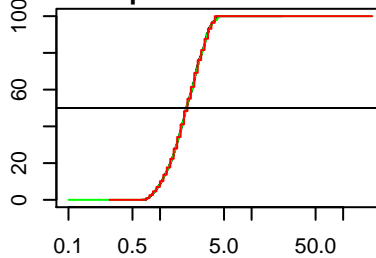

Sample statistics  
 Mass conserved = 1  
 Median(obs/new) = 1.95 / 1.91  
 1%(obs/new) = 0.74 / 0.73  
 5%(obs/new) = 0.88 / 0.87  
 25%(obs/new) = 1.42 / 1.35  
 75%(obs/new) = 2.64 / 2.7  
 95%(obs/new) = 3.63 / 3.8  
 99%(obs/new) = 4.17 / 4.14

Sample 152.44

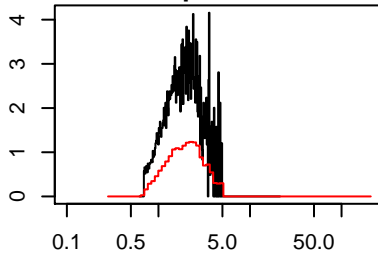

Sample 152.44 cumulative

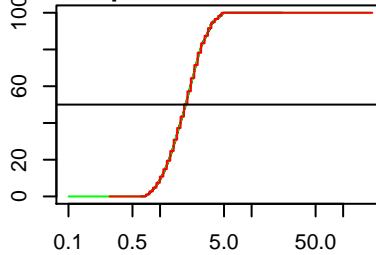

Sample statistics  
 Mass conserved = 1  
 Median(obs/new) = 1.89 / 1.91  
 1%(obs/new) = 0.73 / 0.73  
 5%(obs/new) = 0.88 / 0.87  
 25%(obs/new) = 1.36 / 1.35  
 75%(obs/new) = 2.57 / 2.7  
 95%(obs/new) = 3.79 / 3.8  
 99%(obs/new) = 4.54 / 4.51

Sample 153.8

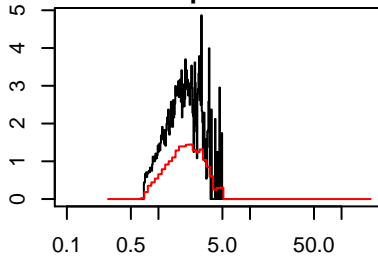

Sample 153.8 cumulative

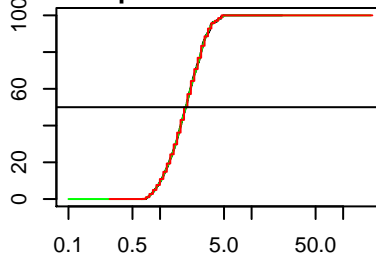

Sample statistics  
 Mass conserved = 1  
 Median(obs/new) = 1.92 / 1.91  
 1%(obs/new) = 0.74 / 0.73  
 5%(obs/new) = 0.87 / 0.87  
 25%(obs/new) = 1.38 / 1.35  
 75%(obs/new) = 2.64 / 2.7  
 95%(obs/new) = 3.63 / 3.8  
 99%(obs/new) = 4.66 / 4.51

Sample 154.6

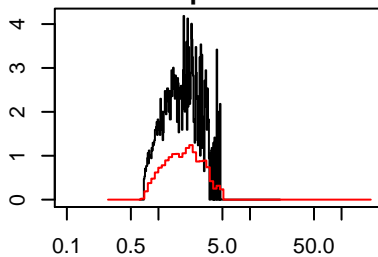

Sample 154.6 cumulative

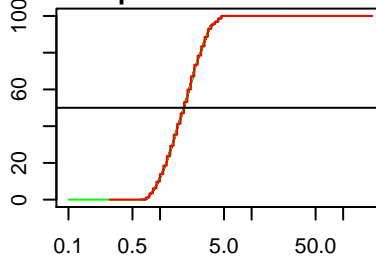

Sample statistics  
 Mass conserved = 1  
 Median(obs/new) = 1.84 / 1.75  
 1%(obs/new) = 0.73 / 0.73  
 5%(obs/new) = 0.85 / 0.87  
 25%(obs/new) = 1.27 / 1.24  
 75%(obs/new) = 2.57 / 2.47  
 95%(obs/new) = 3.74 / 3.8  
 99%(obs/new) = 4.6 / 4.51

Sample 155.73

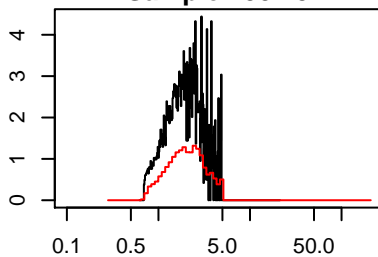

Sample 155.73 cumulative

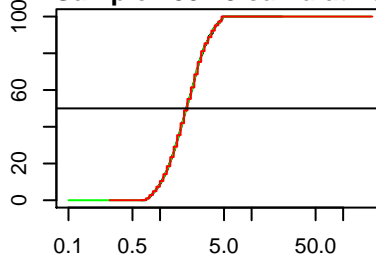

Sample statistics  
 Mass conserved = 1  
 Median(obs/new) = 1.92 / 1.91  
 1%(obs/new) = 0.74 / 0.73  
 5%(obs/new) = 0.88 / 0.87  
 25%(obs/new) = 1.38 / 1.35  
 75%(obs/new) = 2.68 / 2.7  
 95%(obs/new) = 4.12 / 4.14  
 99%(obs/new) = 4.79 / 4.91

Sample 156.8

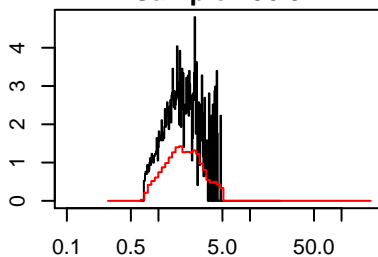

Sample 156.8 cumulative

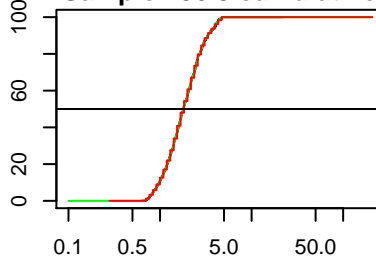

Sample statistics  
 Mass conserved = 1  
 Median(obs/new) = 1.79 / 1.75  
 1%(obs/new) = 0.73 / 0.73  
 5%(obs/new) = 0.85 / 0.87  
 25%(obs/new) = 1.3 / 1.35  
 75%(obs/new) = 2.5 / 2.47  
 95%(obs/new) = 4 / 4.14  
 99%(obs/new) = 4.41 / 4.51



Sample 157.885

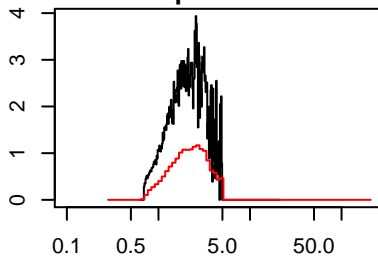

Sample 157.885 cumulative

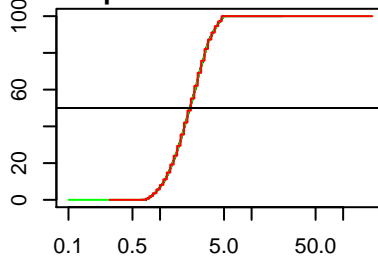

Sample statistics  
 Mass conserved = 1  
 Median(obs/new) = 2.12 / 2.08  
 1%(obs/new) = 0.75 / 0.73  
 5%(obs/new) = 0.93 / 0.95  
 25%(obs/new) = 1.5 / 1.47  
 75%(obs/new) = 2.91 / 2.94  
 95%(obs/new) = 4.23 / 4.14  
 99%(obs/new) = 4.79 / 4.91

Sample 158.435

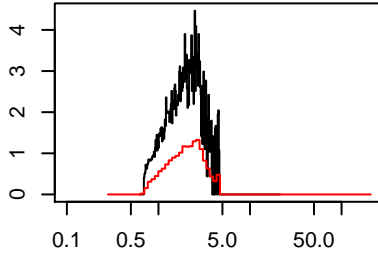

Sample 158.435 cumulative

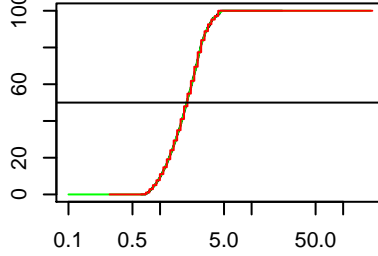

Sample statistics  
 Mass conserved = 1  
 Median(obs/new) = 1.95 / 1.91  
 1%(obs/new) = 0.74 / 0.73  
 5%(obs/new) = 0.87 / 0.87  
 25%(obs/new) = 1.38 / 1.35  
 75%(obs/new) = 2.61 / 2.7  
 95%(obs/new) = 3.74 / 3.8  
 99%(obs/new) = 4.47 / 4.51

Sample 159.44

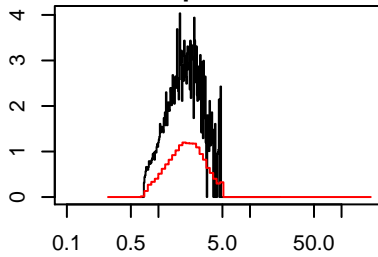

Sample 159.44 cumulative

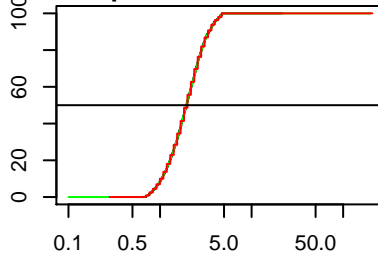

Sample statistics  
 Mass conserved = 1  
 Median(obs/new) = 1.95 / 1.91  
 1%(obs/new) = 0.74 / 0.73  
 5%(obs/new) = 0.9 / 0.87  
 25%(obs/new) = 1.4 / 1.35  
 75%(obs/new) = 2.64 / 2.7  
 95%(obs/new) = 3.89 / 3.8  
 99%(obs/new) = 4.6 / 4.51

Sample 160.925

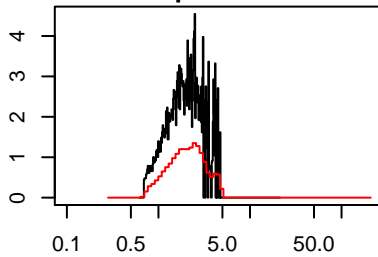

Sample 160.925 cumulative

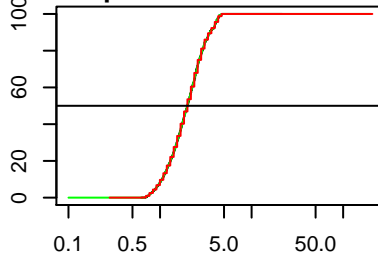

Sample statistics  
 Mass conserved = 1  
 Median(obs/new) = 2 / 1.91  
 1%(obs/new) = 0.74 / 0.73  
 5%(obs/new) = 0.9 / 0.87  
 25%(obs/new) = 1.42 / 1.47  
 75%(obs/new) = 2.68 / 2.7  
 95%(obs/new) = 4.06 / 4.14  
 99%(obs/new) = 4.47 / 4.51

Sample 162.125

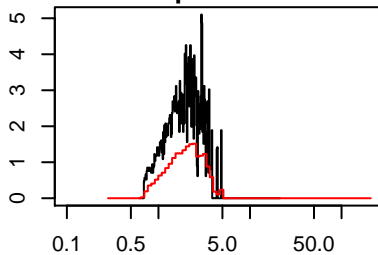

Sample 162.125 cumulative

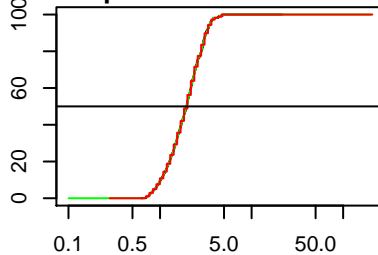

Sample statistics  
 Mass conserved = 1  
 Median(obs/new) = 1.95 / 1.91  
 1%(obs/new) = 0.73 / 0.73  
 5%(obs/new) = 0.88 / 0.87  
 25%(obs/new) = 1.38 / 1.35  
 75%(obs/new) = 2.57 / 2.7  
 95%(obs/new) = 3.53 / 3.49  
 99%(obs/new) = 4.41 / 4.51

Sample 162.41

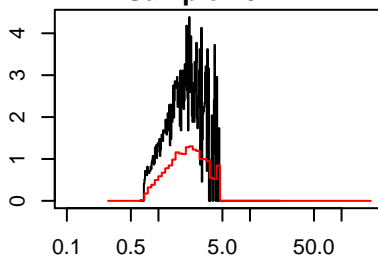

Sample 162.41 cumulative

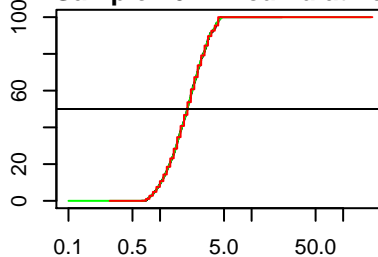

Sample statistics  
 Mass conserved = 1  
 Median(obs/new) = 2 / 1.91  
 1%(obs/new) = 0.73 / 0.73  
 5%(obs/new) = 0.87 / 0.87  
 25%(obs/new) = 1.4 / 1.35  
 75%(obs/new) = 2.75 / 2.7  
 95%(obs/new) = 4.06 / 4.14  
 99%(obs/new) = 4.54 / 4.51

Sample 163.405

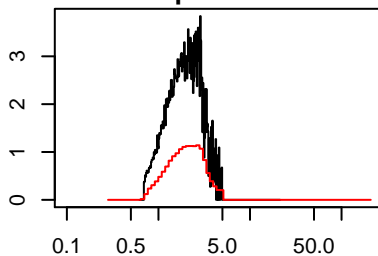

Sample 163.405 cumulative

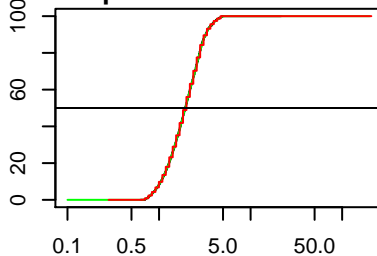

Sample statistics  
 Mass conserved = 1  
 Median(obs/new) = 1.92 / 1.91  
 1%(obs/new) = 0.74 / 0.73  
 5%(obs/new) = 0.9 / 0.87  
 25%(obs/new) = 1.4 / 1.35  
 75%(obs/new) = 2.61 / 2.7  
 95%(obs/new) = 3.74 / 3.8  
 99%(obs/new) = 4.54 / 4.51

Sample 164.38

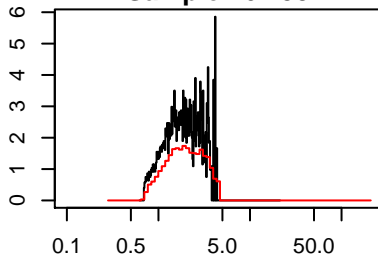

Sample 164.38 cumulative

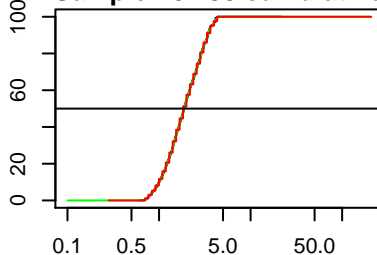

Sample statistics  
 Mass conserved = 1  
 Median(obs/new) = 1.87 / 1.91  
 1%(obs/new) = 0.73 / 0.73  
 5%(obs/new) = 0.86 / 0.87  
 25%(obs/new) = 1.34 / 1.35  
 75%(obs/new) = 2.72 / 2.7  
 95%(obs/new) = 3.74 / 3.8  
 99%(obs/new) = 4.17 / 4.51

Sample 165.765

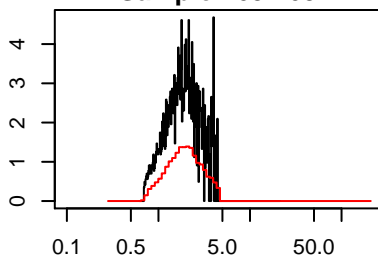

Sample 165.765 cumulative

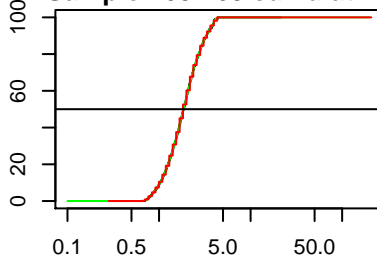

Sample statistics  
 Mass conserved = 1  
 Median(obs/new) = 1.84 / 1.91  
 1%(obs/new) = 0.74 / 0.73  
 5%(obs/new) = 0.88 / 0.87  
 25%(obs/new) = 1.36 / 1.35  
 75%(obs/new) = 2.5 / 2.47  
 95%(obs/new) = 3.79 / 3.8  
 99%(obs/new) = 4.12 / 4.14

Sample 166.38

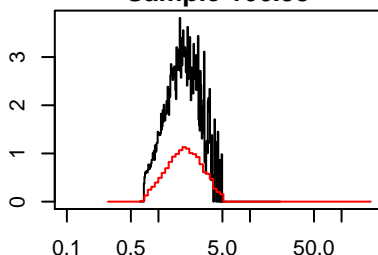

Sample 166.38 cumulative

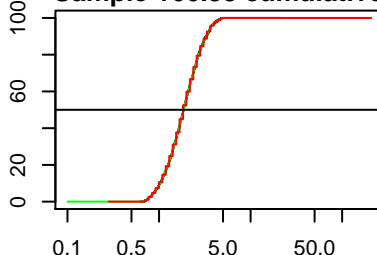

Sample statistics  
 Mass conserved = 1  
 Median(obs/new) = 1.84 / 1.91  
 1%(obs/new) = 0.74 / 0.73  
 5%(obs/new) = 0.88 / 0.87  
 25%(obs/new) = 1.36 / 1.35  
 75%(obs/new) = 2.53 / 2.47  
 95%(obs/new) = 3.68 / 3.8  
 99%(obs/new) = 4.47 / 4.51

Sample 167.91

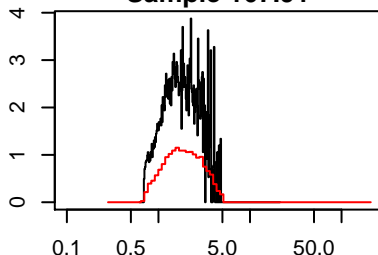

Sample 167.91 cumulative

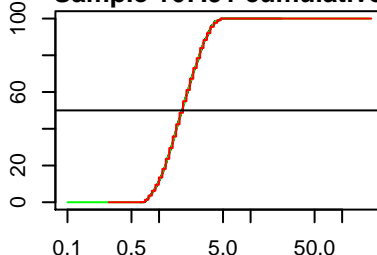

Sample statistics  
 Mass conserved = 1  
 Median(obs/new) = 1.79 / 1.75  
 1%(obs/new) = 0.73 / 0.73  
 5%(obs/new) = 0.84 / 0.87  
 25%(obs/new) = 1.27 / 1.24  
 75%(obs/new) = 2.57 / 2.47  
 95%(obs/new) = 3.68 / 3.8  
 99%(obs/new) = 4.41 / 4.51

Sample 168.38

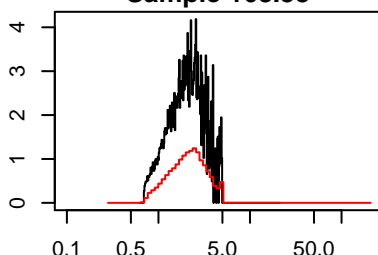

Sample 168.38 cumulative

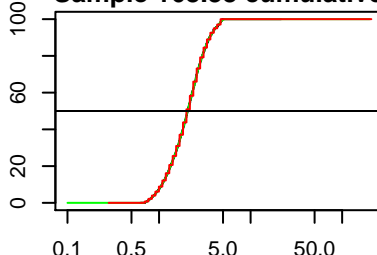

Sample statistics  
 Mass conserved = 1  
 Median(obs/new) = 2.06 / 2.08  
 1%(obs/new) = 0.75 / 0.73  
 5%(obs/new) = 0.91 / 0.87  
 25%(obs/new) = 1.46 / 1.47  
 75%(obs/new) = 2.75 / 2.7  
 95%(obs/new) = 4.12 / 4.14  
 99%(obs/new) = 4.79 / 4.91

Sample 169.92

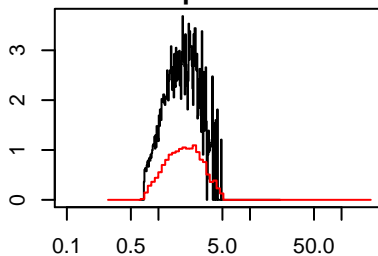

Sample 169.92 cumulative

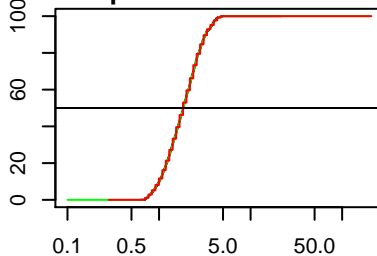

Sample statistics  
 Mass conserved = 1  
 Median(obs/new) = 1.84 / 1.91  
 1%(obs/new) = 0.74 / 0.73  
 5%(obs/new) = 0.87 / 0.87  
 25%(obs/new) = 1.3 / 1.35  
 75%(obs/new) = 2.53 / 2.47  
 95%(obs/new) = 3.79 / 3.8  
 99%(obs/new) = 4.23 / 4.51

Sample 170.43

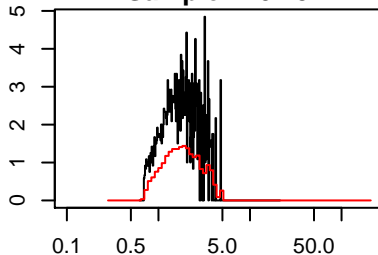

Sample 170.43 cumulative

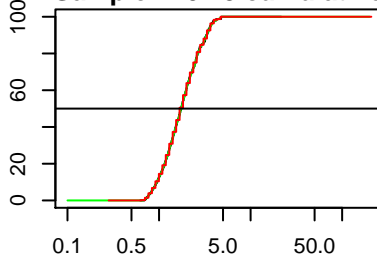

Sample statistics  
 Mass conserved = 1  
 Median(obs/new) = 1.74 / 1.75  
 1%(obs/new) = 0.72 / 0.73  
 5%(obs/new) = 0.84 / 0.8  
 25%(obs/new) = 1.25 / 1.24  
 75%(obs/new) = 2.5 / 2.47  
 95%(obs/new) = 3.63 / 3.8  
 99%(obs/new) = 4.23 / 4.51

Sample 171.43

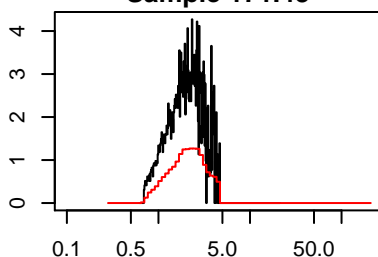

Sample 171.43 cumulative

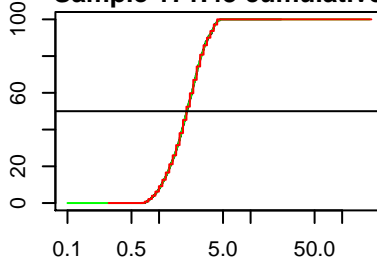

Sample statistics  
 Mass conserved = 1  
 Median(obs/new) = 2.03 / 2.08  
 1%(obs/new) = 0.75 / 0.73  
 5%(obs/new) = 0.91 / 0.87  
 25%(obs/new) = 1.46 / 1.47  
 75%(obs/new) = 2.72 / 2.7  
 95%(obs/new) = 3.95 / 3.8  
 99%(obs/new) = 4.35 / 4.51

Sample 172.43

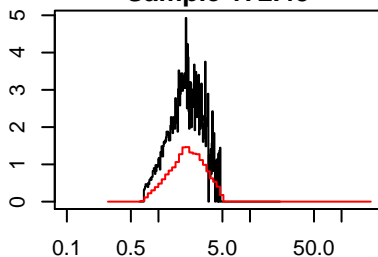

Sample 172.43 cumulative

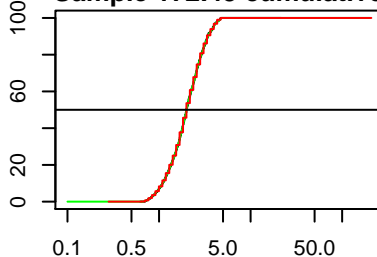

Sample statistics  
 Mass conserved = 1  
 Median(obs/new) = 2 / 2.08  
 1%(obs/new) = 0.75 / 0.73  
 5%(obs/new) = 0.93 / 0.95  
 25%(obs/new) = 1.48 / 1.47  
 75%(obs/new) = 2.72 / 2.7  
 95%(obs/new) = 3.89 / 3.8  
 99%(obs/new) = 4.54 / 4.51

Sample 173.785

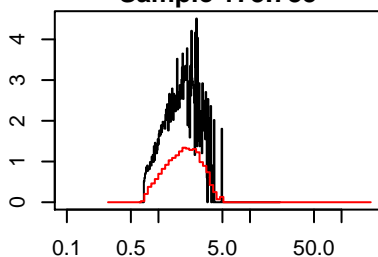

Sample 173.785 cumulative

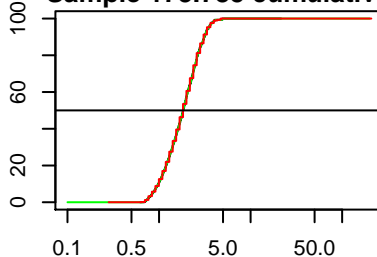

Sample statistics  
 Mass conserved = 1  
 Median(obs/new) = 1.84 / 1.91  
 1%(obs/new) = 0.73 / 0.73  
 5%(obs/new) = 0.86 / 0.87  
 25%(obs/new) = 1.3 / 1.35  
 75%(obs/new) = 2.5 / 2.47  
 95%(obs/new) = 3.49 / 3.49  
 99%(obs/new) = 4.06 / 4.14

Sample 174.525

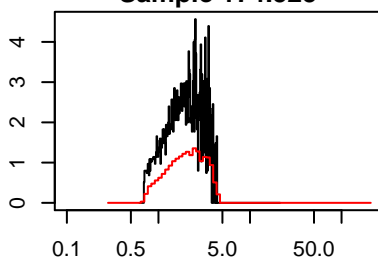

Sample 174.525 cumulative

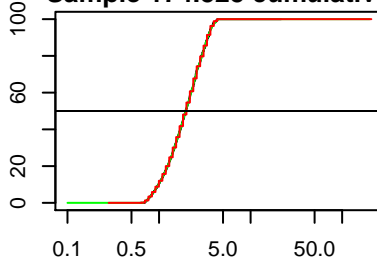

Sample statistics  
 Mass conserved = 1  
 Median(obs/new) = 1.95 / 1.91  
 1%(obs/new) = 0.73 / 0.73  
 5%(obs/new) = 0.85 / 0.87  
 25%(obs/new) = 1.36 / 1.35  
 75%(obs/new) = 2.75 / 2.7  
 95%(obs/new) = 3.68 / 3.8  
 99%(obs/new) = 4.17 / 4.14

Sample 175.6

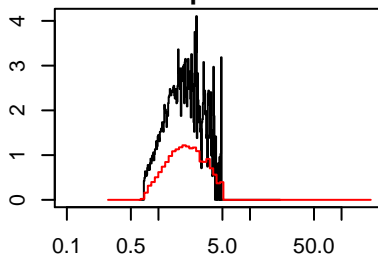

Sample 175.6 cumulative

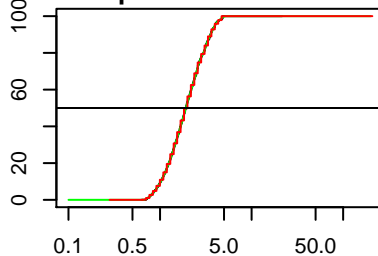

Sample statistics  
 Mass conserved = 1  
 Median(obs/new) = 1.92 / 1.91  
 1%(obs/new) = 0.74 / 0.73  
 5%(obs/new) = 0.88 / 0.87  
 25%(obs/new) = 1.36 / 1.35  
 75%(obs/new) = 2.68 / 2.7  
 95%(obs/new) = 4 / 4.14  
 99%(obs/new) = 4.79 / 4.91

Sample 176.34

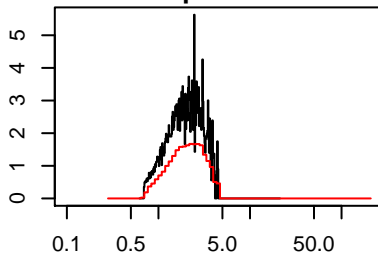

Sample 176.34 cumulative

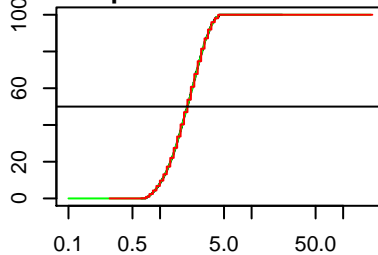

Sample statistics  
 Mass conserved = 1  
 Median(obs/new) = 1.97 / 1.91  
 1%(obs/new) = 0.74 / 0.73  
 5%(obs/new) = 0.9 / 0.87  
 25%(obs/new) = 1.42 / 1.47  
 75%(obs/new) = 2.72 / 2.7  
 95%(obs/new) = 3.68 / 3.8  
 99%(obs/new) = 4.35 / 4.14

Sample 177.69

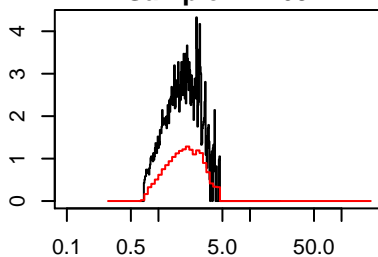

Sample 177.69 cumulative

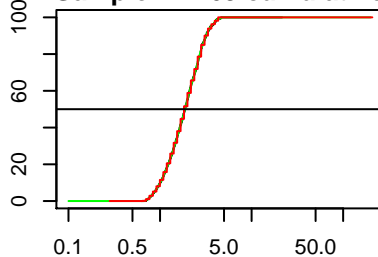

Sample statistics  
 Mass conserved = 1  
 Median(obs/new) = 1.87 / 1.91  
 1%(obs/new) = 0.74 / 0.73  
 5%(obs/new) = 0.87 / 0.87  
 25%(obs/new) = 1.34 / 1.35  
 75%(obs/new) = 2.57 / 2.47  
 95%(obs/new) = 3.58 / 3.49  
 99%(obs/new) = 4.17 / 4.14

Sample 178.31

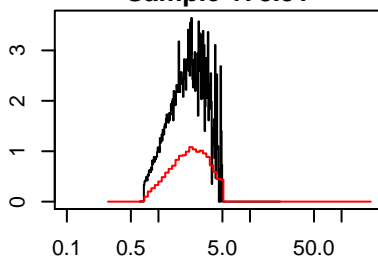

Sample 178.31 cumulative

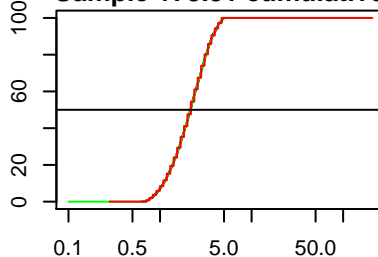

Sample statistics  
 Mass conserved = 1  
 Median(obs/new) = 2.15 / 2.08  
 1%(obs/new) = 0.75 / 0.73  
 5%(obs/new) = 0.92 / 0.95  
 25%(obs/new) = 1.5 / 1.47  
 75%(obs/new) = 2.95 / 2.94  
 95%(obs/new) = 4.23 / 4.14  
 99%(obs/new) = 4.79 / 4.91

Sample 179.31

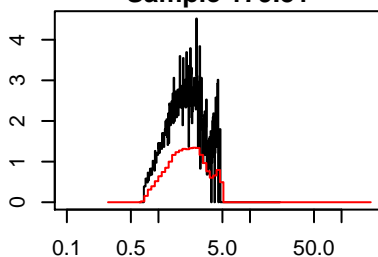

Sample 179.31 cumulative

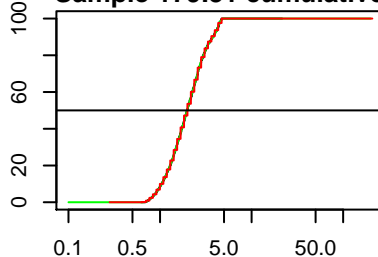

Sample statistics  
 Mass conserved = 1  
 Median(obs/new) = 1.97 / 1.91  
 1%(obs/new) = 0.74 / 0.73  
 5%(obs/new) = 0.9 / 0.87  
 25%(obs/new) = 1.4 / 1.35  
 75%(obs/new) = 2.75 / 2.7  
 95%(obs/new) = 4.29 / 4.14  
 99%(obs/new) = 4.66 / 4.91

Sample 180.56

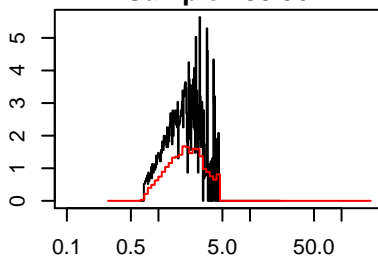

Sample 180.56 cumulative

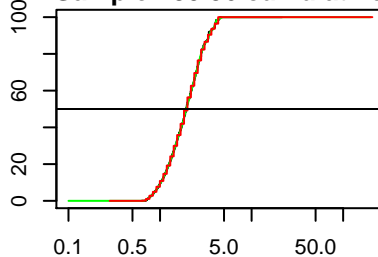

Sample statistics  
 Mass conserved = 1  
 Median(obs/new) = 1.92 / 1.91  
 1%(obs/new) = 0.73 / 0.73  
 5%(obs/new) = 0.88 / 0.87  
 25%(obs/new) = 1.36 / 1.35  
 75%(obs/new) = 2.64 / 2.7  
 95%(obs/new) = 3.89 / 3.8  
 99%(obs/new) = 4.41 / 4.51

Sample 180.97

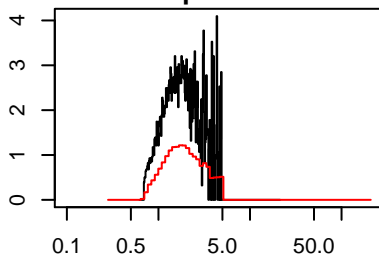

Sample 180.97 cumulative

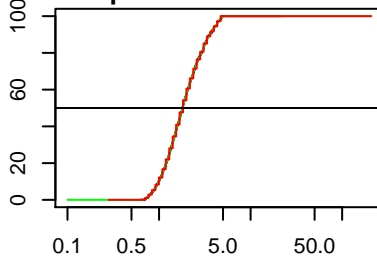

Sample statistics  
 Mass conserved = 1  
 Median(obs/new) = 1.82 / 1.75  
 1%(obs/new) = 0.74 / 0.73  
 5%(obs/new) = 0.87 / 0.87  
 25%(obs/new) = 1.3 / 1.24  
 75%(obs/new) = 2.61 / 2.7  
 95%(obs/new) = 4.23 / 4.14  
 99%(obs/new) = 4.79 / 4.91

Sample 183.19

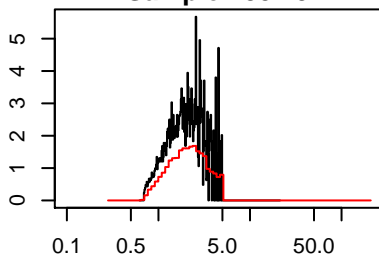

Sample 183.19 cumulative

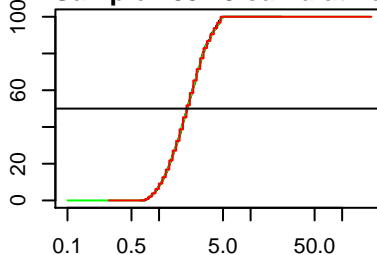

Sample statistics  
 Mass conserved = 1  
 Median(obs/new) = 2.06 / 2.08  
 1%(obs/new) = 0.75 / 0.73  
 5%(obs/new) = 0.92 / 0.87  
 25%(obs/new) = 1.42 / 1.47  
 75%(obs/new) = 2.83 / 2.94  
 95%(obs/new) = 4.23 / 4.14  
 99%(obs/new) = 4.79 / 4.91

Sample 184.15

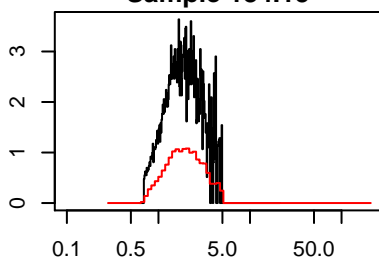

Sample 184.15 cumulative

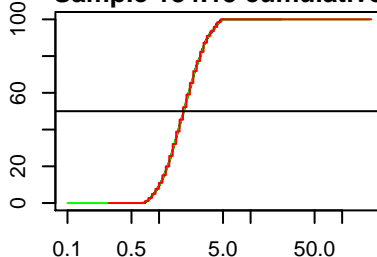

Sample statistics  
 Mass conserved = 1  
 Median(obs/new) = 1.87 / 1.91  
 1%(obs/new) = 0.74 / 0.73  
 5%(obs/new) = 0.87 / 0.87  
 25%(obs/new) = 1.34 / 1.35  
 75%(obs/new) = 2.57 / 2.7  
 95%(obs/new) = 4 / 4.14  
 99%(obs/new) = 4.6 / 4.51

Sample 184.96

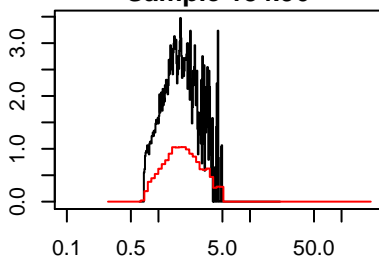

Sample 184.96 cumulative

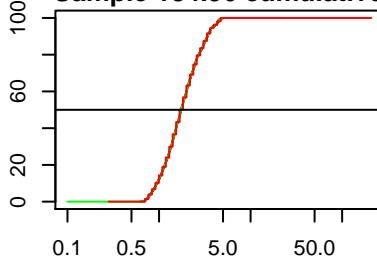

Sample statistics  
 Mass conserved = 1  
 Median(obs/new) = 1.74 / 1.75  
 1%(obs/new) = 0.73 / 0.73  
 5%(obs/new) = 0.84 / 0.8  
 25%(obs/new) = 1.27 / 1.24  
 75%(obs/new) = 2.46 / 2.47  
 95%(obs/new) = 3.84 / 3.8  
 99%(obs/new) = 4.47 / 4.51

Sample 186.7

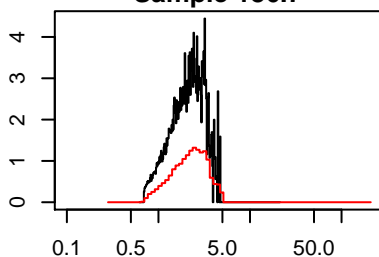

Sample 186.7 cumulative

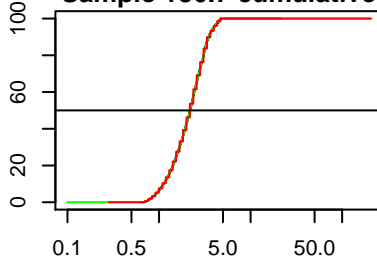

Sample statistics  
 Mass conserved = 1  
 Median(obs/new) = 2.18 / 2.27  
 1%(obs/new) = 0.76 / 0.73  
 5%(obs/new) = 0.95 / 0.95  
 25%(obs/new) = 1.54 / 1.61  
 75%(obs/new) = 2.87 / 2.94  
 95%(obs/new) = 4 / 4.14  
 99%(obs/new) = 4.54 / 4.51

Sample 188.1

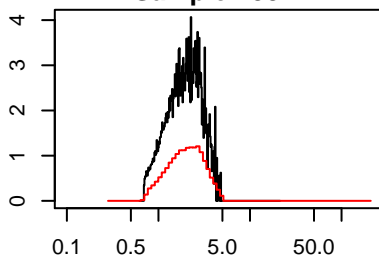

Sample 188.1 cumulative

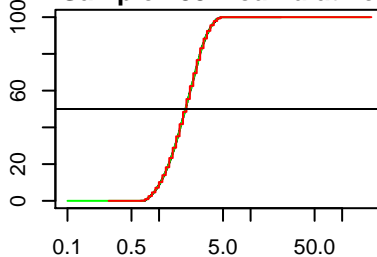

Sample statistics  
 Mass conserved = 1  
 Median(obs/new) = 1.95 / 1.91  
 1%(obs/new) = 0.74 / 0.73  
 5%(obs/new) = 0.9 / 0.87  
 25%(obs/new) = 1.4 / 1.35  
 75%(obs/new) = 2.64 / 2.7  
 95%(obs/new) = 3.68 / 3.8  
 99%(obs/new) = 4.35 / 4.51

Sample 188.55

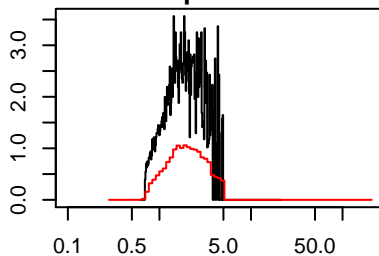

Sample 188.55 cumulative

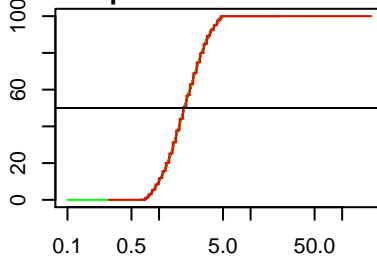

Sample statistics  
 Mass conserved = 1  
 Median(obs/new) = 1.89 / 1.91  
 1%(obs/new) = 0.73 / 0.73  
 5%(obs/new) = 0.86 / 0.87  
 25%(obs/new) = 1.34 / 1.35  
 75%(obs/new) = 2.72 / 2.7  
 95%(obs/new) = 4.12 / 4.14  
 99%(obs/new) = 4.54 / 4.91

Sample 190.3

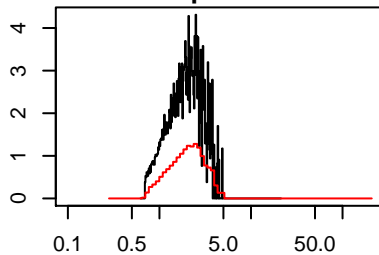

Sample 190.3 cumulative

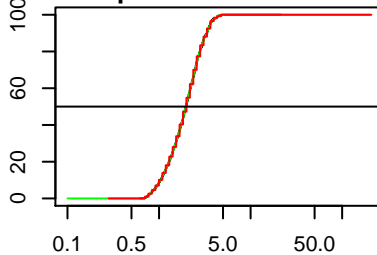

Sample statistics  
 Mass conserved = 1  
 Median(obs/new) = 1.97 / 1.91  
 1%(obs/new) = 0.74 / 0.73  
 5%(obs/new) = 0.9 / 0.87  
 25%(obs/new) = 1.4 / 1.35  
 75%(obs/new) = 2.61 / 2.7  
 95%(obs/new) = 3.63 / 3.8  
 99%(obs/new) = 4.35 / 4.51

Sample 190.57

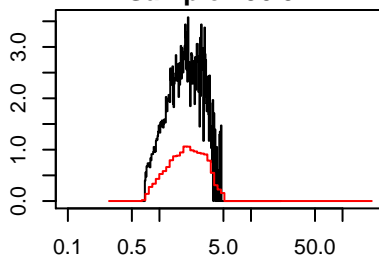

Sample 190.57 cumulative

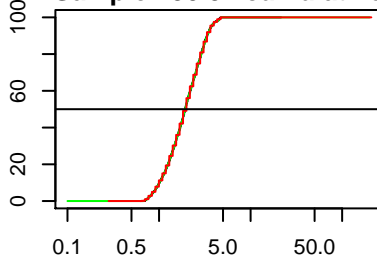

Sample statistics  
 Mass conserved = 1  
 Median(obs/new) = 1.92 / 1.91  
 1%(obs/new) = 0.74 / 0.73  
 5%(obs/new) = 0.87 / 0.87  
 25%(obs/new) = 1.36 / 1.35  
 75%(obs/new) = 2.68 / 2.7  
 95%(obs/new) = 3.74 / 3.8  
 99%(obs/new) = 4.54 / 4.51

Sample 191.99

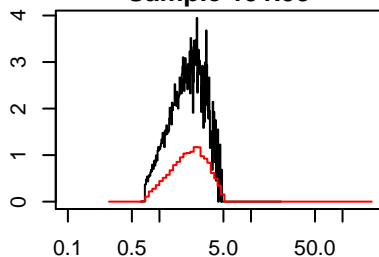

Sample 191.99 cumulative

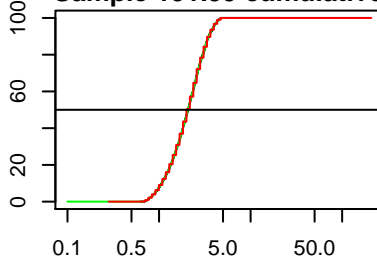

Sample statistics  
 Mass conserved = 1  
 Median(obs/new) = 2.09 / 2.08  
 1%(obs/new) = 0.75 / 0.73  
 5%(obs/new) = 0.91 / 0.87  
 25%(obs/new) = 1.46 / 1.47  
 75%(obs/new) = 2.79 / 2.7  
 95%(obs/new) = 3.95 / 3.8  
 99%(obs/new) = 4.54 / 4.51

Sample 192.45

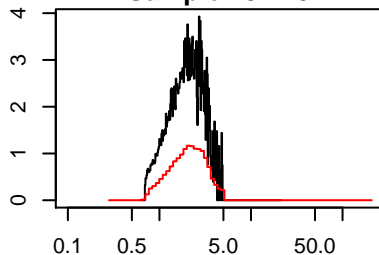

Sample 192.45 cumulative

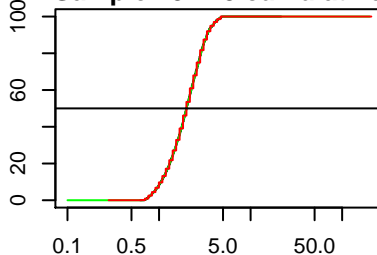

Sample statistics  
 Mass conserved = 1  
 Median(obs/new) = 2 / 2.08  
 1%(obs/new) = 0.74 / 0.73  
 5%(obs/new) = 0.9 / 0.87  
 25%(obs/new) = 1.42 / 1.47  
 75%(obs/new) = 2.72 / 2.7  
 95%(obs/new) = 3.84 / 3.8  
 99%(obs/new) = 4.54 / 4.51

Sample 193.39

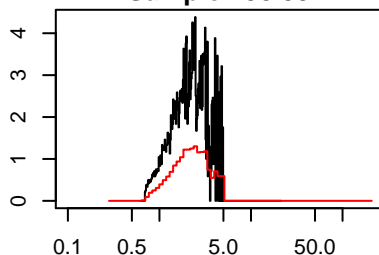

Sample 193.39 cumulative

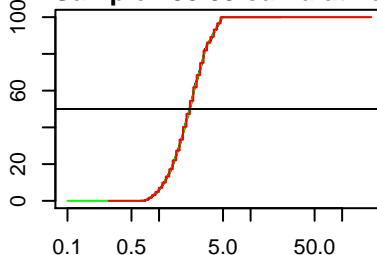

Sample statistics  
 Mass conserved = 1  
 Median(obs/new) = 2.15 / 2.08  
 1%(obs/new) = 0.76 / 0.73  
 5%(obs/new) = 0.96 / 0.95  
 25%(obs/new) = 1.54 / 1.61  
 75%(obs/new) = 2.95 / 2.94  
 95%(obs/new) = 4.29 / 4.51  
 99%(obs/new) = 4.79 / 4.91

Sample 194.39

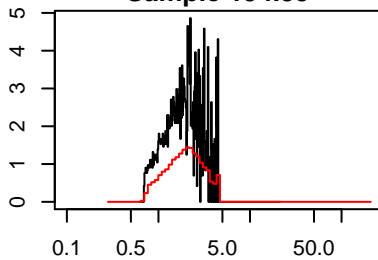

Sample 194.39 cumulative

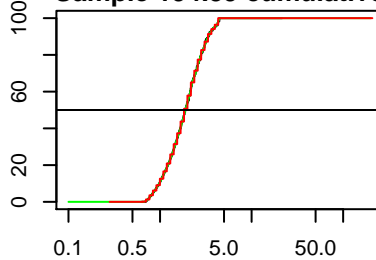

Sample statistics  
 Mass conserved = 1  
 Median(obs/new) = 1.89 / 1.91  
 1%(obs/new) = 0.73 / 0.73  
 5%(obs/new) = 0.85 / 0.87  
 25%(obs/new) = 1.34 / 1.35  
 75%(obs/new) = 2.61 / 2.7  
 95%(obs/new) = 3.89 / 3.8  
 99%(obs/new) = 4.35 / 4.51

Sample 195.39

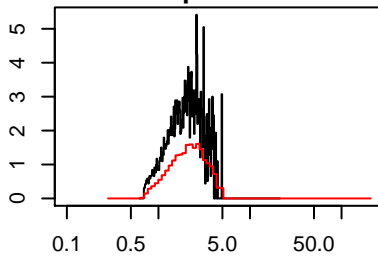

Sample 195.39 cumulative

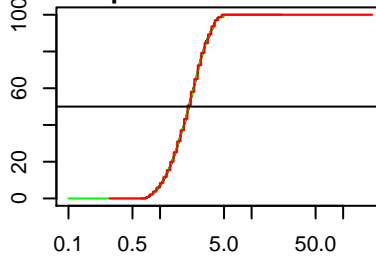

Sample statistics  
 Mass conserved = 1  
 Median(obs/new) = 2.06 / 2.08  
 1%(obs/new) = 0.75 / 0.73  
 5%(obs/new) = 0.92 / 0.95  
 25%(obs/new) = 1.48 / 1.47  
 75%(obs/new) = 2.75 / 2.7  
 95%(obs/new) = 3.89 / 3.8  
 99%(obs/new) = 4.41 / 4.51

Sample 196.37

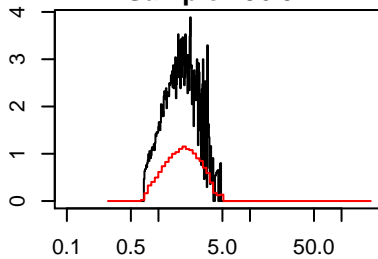

Sample 196.37 cumulative

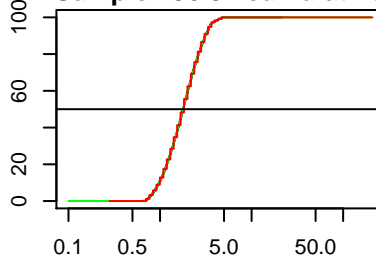

Sample statistics  
 Mass conserved = 1  
 Median(obs/new) = 1.79 / 1.75  
 1%(obs/new) = 0.73 / 0.73  
 5%(obs/new) = 0.85 / 0.87  
 25%(obs/new) = 1.28 / 1.24  
 75%(obs/new) = 2.46 / 2.47  
 95%(obs/new) = 3.49 / 3.49  
 99%(obs/new) = 4.35 / 4.51

Sample 197.91

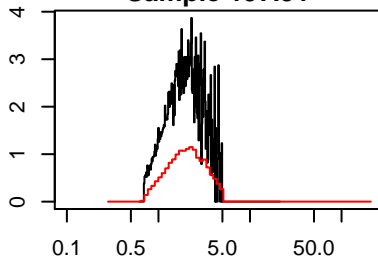

Sample 197.91 cumulative

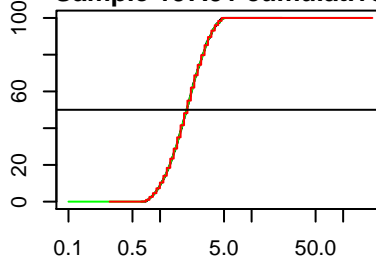

Sample statistics  
 Mass conserved = 1  
 Median(obs/new) = 1.95 / 1.91  
 1%(obs/new) = 0.74 / 0.73  
 5%(obs/new) = 0.88 / 0.87  
 25%(obs/new) = 1.4 / 1.35  
 75%(obs/new) = 2.72 / 2.7  
 95%(obs/new) = 3.95 / 4.14  
 99%(obs/new) = 4.6 / 4.51

Sample 198.48

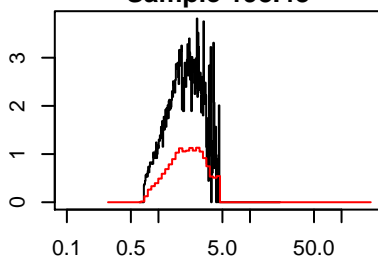

Sample 198.48 cumulative

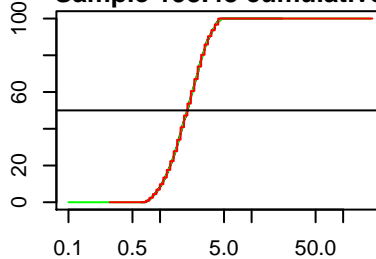

Sample statistics  
 Mass conserved = 1  
 Median(obs/new) = 1.97 / 1.91  
 1%(obs/new) = 0.74 / 0.73  
 5%(obs/new) = 0.9 / 0.87  
 25%(obs/new) = 1.42 / 1.35  
 75%(obs/new) = 2.72 / 2.7  
 95%(obs/new) = 3.95 / 3.8  
 99%(obs/new) = 4.41 / 4.51

Sample 199.99

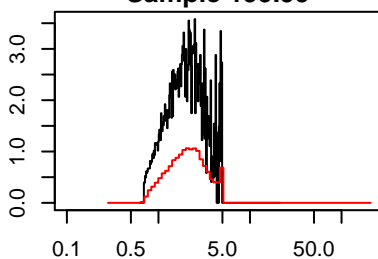

Sample 199.99 cumulative

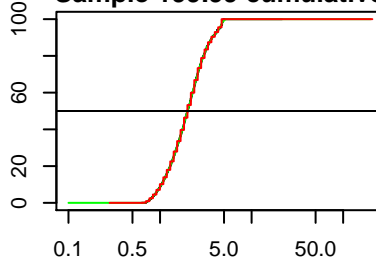

Sample statistics  
 Mass conserved = 1  
 Median(obs/new) = 2 / 2.08  
 1%(obs/new) = 0.74 / 0.73  
 5%(obs/new) = 0.9 / 0.87  
 25%(obs/new) = 1.42 / 1.35  
 75%(obs/new) = 2.75 / 2.7  
 95%(obs/new) = 4.47 / 4.51  
 99%(obs/new) = 4.86 / 4.91

Sample 200.81

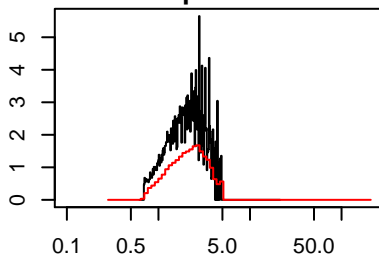

Sample 200.81 cumulative

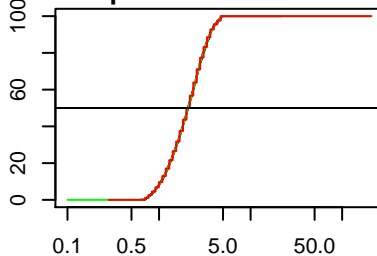

```
Sample statistics
Mass conserved = 1
Median(obs/new) = 2.09 / 2.08
1%(obs/new) = 0.73 / 0.73
5%(obs/new) = 0.9 / 0.87
25%(obs/new) = 1.44 / 1.47
75%(obs/new) = 2.83 / 2.94
95%(obs/new) = 4 / 4.14
99%(obs/new) = 4.73 / 4.91
```

Sample 202

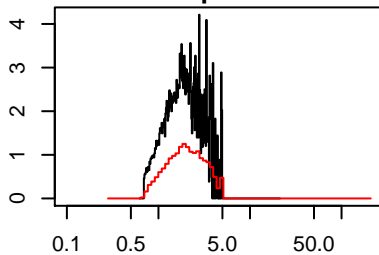

Sample 202 cumulative

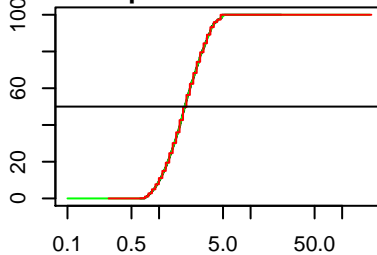

```
Sample statistics
Mass conserved = 1
Median(obs/new) = 1.92 / 1.91
1%(obs/new) = 0.74 / 0.73
5%(obs/new) = 0.87 / 0.87
25%(obs/new) = 1.36 / 1.35
75%(obs/new) = 2.75 / 2.7
95%(obs/new) = 3.95 / 4.14
99%(obs/new) = 4.86 / 4.91
```

Sample 202.61

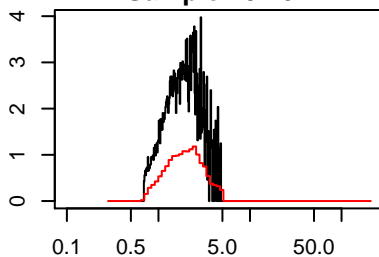

Sample 202.61 cumulative

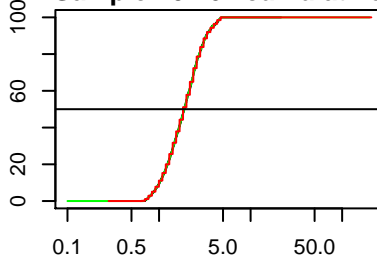

```
Sample statistics
Mass conserved = 1
Median(obs/new) = 1.89 / 1.91
1%(obs/new) = 0.74 / 0.73
5%(obs/new) = 0.87 / 0.87
25%(obs/new) = 1.34 / 1.35
75%(obs/new) = 2.57 / 2.47
95%(obs/new) = 3.79 / 3.8
99%(obs/new) = 4.6 / 4.51
```

Sample 203.47

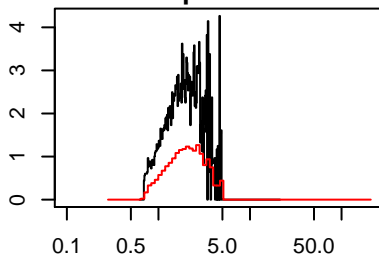

Sample 203.47 cumulative

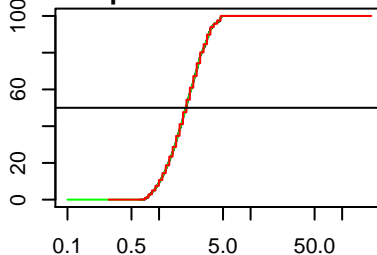

```
Sample statistics
Mass conserved = 1
Median(obs/new) = 1.97 / 1.91
1%(obs/new) = 0.74 / 0.73
5%(obs/new) = 0.87 / 0.87
25%(obs/new) = 1.4 / 1.35
75%(obs/new) = 2.72 / 2.7
95%(obs/new) = 3.95 / 4.14
99%(obs/new) = 4.66 / 4.91
```

Sample 205.65

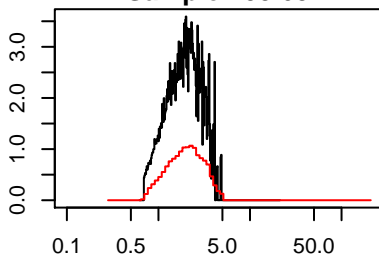

Sample 205.65 cumulative

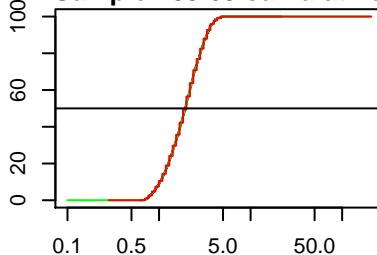

```
Sample statistics
Mass conserved = 1
Median(obs/new) = 1.92 / 1.91
1%(obs/new) = 0.74 / 0.73
5%(obs/new) = 0.88 / 0.87
25%(obs/new) = 1.38 / 1.35
75%(obs/new) = 2.64 / 2.7
95%(obs/new) = 3.63 / 3.8
99%(obs/new) = 4.35 / 4.51
```

Sample 206.15

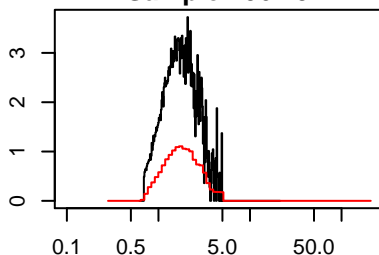

Sample 206.15 cumulative

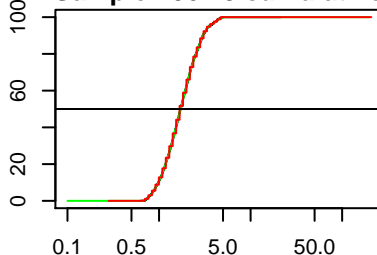

```
Sample statistics
Mass conserved = 1
Median(obs/new) = 1.72 / 1.75
1%(obs/new) = 0.73 / 0.73
5%(obs/new) = 0.86 / 0.87
25%(obs/new) = 1.27 / 1.24
75%(obs/new) = 2.33 / 2.27
95%(obs/new) = 3.49 / 3.49
99%(obs/new) = 4.47 / 4.51
```



Sample 208.59

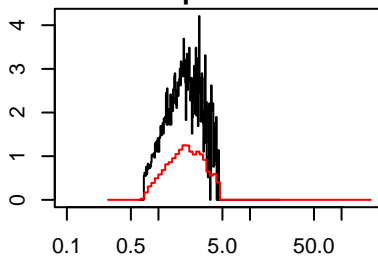

Sample 208.59 cumulative

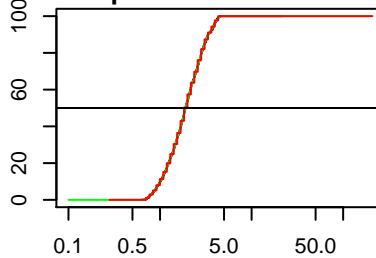

Sample statistics  
 Mass conserved = 1  
 Median(obs/new) = 1.89 / 1.91  
 1%(obs/new) = 0.73 / 0.73  
 5%(obs/new) = 0.87 / 0.87  
 25%(obs/new) = 1.36 / 1.35  
 75%(obs/new) = 2.68 / 2.7  
 95%(obs/new) = 3.89 / 3.8  
 99%(obs/new) = 4.29 / 4.51

Sample 209.76

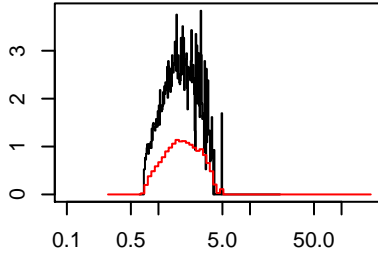

Sample 209.76 cumulative

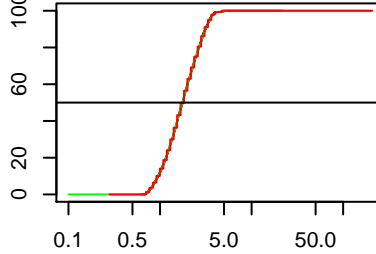

Sample statistics  
 Mass conserved = 1  
 Median(obs/new) = 1.77 / 1.75  
 1%(obs/new) = 0.73 / 0.73  
 5%(obs/new) = 0.84 / 0.8  
 25%(obs/new) = 1.25 / 1.24  
 75%(obs/new) = 2.46 / 2.47  
 95%(obs/new) = 3.49 / 3.49  
 99%(obs/new) = 3.95 / 4.14

Sample 210.25

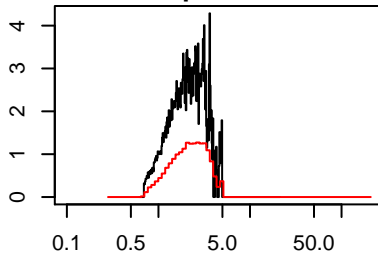

Sample 210.25 cumulative

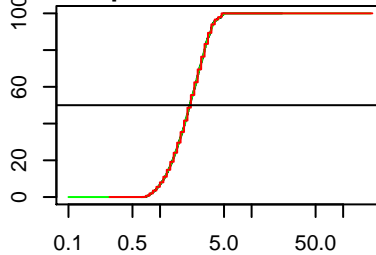

Sample statistics  
 Mass conserved = 1  
 Median(obs/new) = 2.12 / 2.08  
 1%(obs/new) = 0.75 / 0.73  
 5%(obs/new) = 0.93 / 0.95  
 25%(obs/new) = 1.5 / 1.47  
 75%(obs/new) = 2.91 / 2.94  
 95%(obs/new) = 3.84 / 3.8  
 99%(obs/new) = 4.79 / 4.91

Sample 211.41

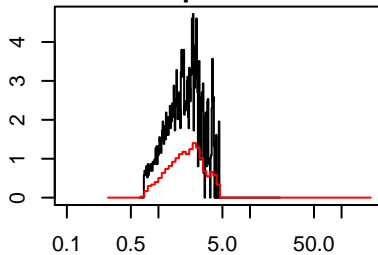

Sample 211.41 cumulative

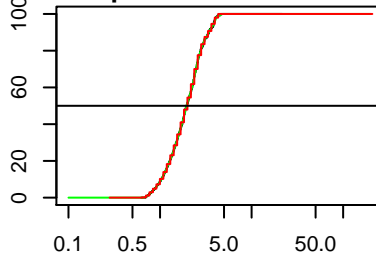

Sample statistics  
 Mass conserved = 1  
 Median(obs/new) = 1.95 / 1.91  
 1%(obs/new) = 0.73 / 0.73  
 5%(obs/new) = 0.88 / 0.87  
 25%(obs/new) = 1.4 / 1.35  
 75%(obs/new) = 2.61 / 2.7  
 95%(obs/new) = 3.89 / 3.8  
 99%(obs/new) = 4.29 / 4.14

Sample 213.17

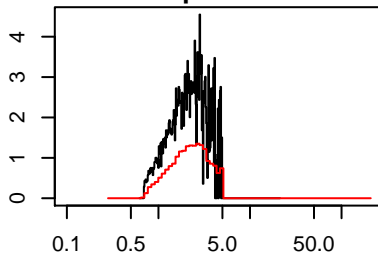

Sample 213.17 cumulative

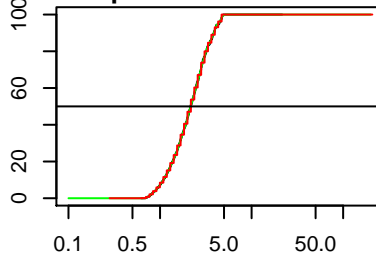

Sample statistics  
 Mass conserved = 1  
 Median(obs/new) = 2.15 / 2.08  
 1%(obs/new) = 0.75 / 0.73  
 5%(obs/new) = 0.92 / 0.95  
 25%(obs/new) = 1.52 / 1.47  
 75%(obs/new) = 2.95 / 2.94  
 95%(obs/new) = 4.41 / 4.51  
 99%(obs/new) = 4.79 / 4.91

Sample 214.3

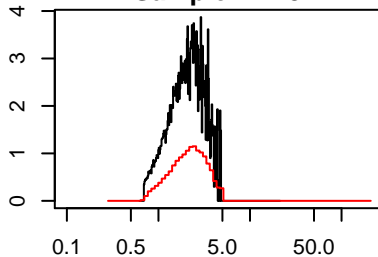

Sample 214.3 cumulative

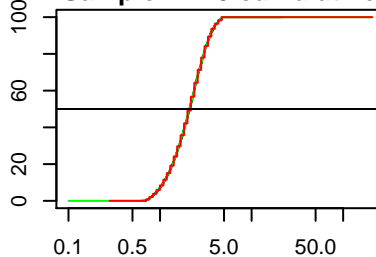

Sample statistics  
 Mass conserved = 1  
 Median(obs/new) = 2.09 / 2.08  
 1%(obs/new) = 0.75 / 0.73  
 5%(obs/new) = 0.92 / 0.95  
 25%(obs/new) = 1.5 / 1.47  
 75%(obs/new) = 2.83 / 2.94  
 95%(obs/new) = 3.95 / 3.8  
 99%(obs/new) = 4.54 / 4.51

Sample 215.1

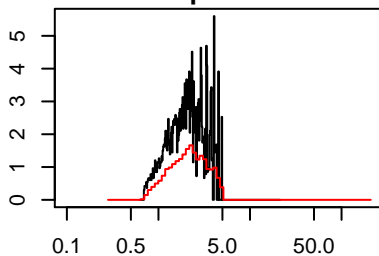

Sample 215.1 cumulative

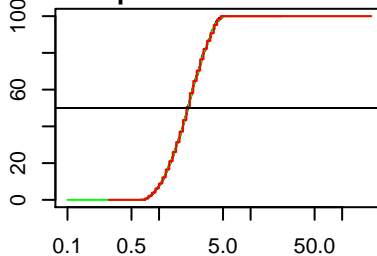

Sample statistics  
 Mass conserved = 1  
 Median(obs/new) = 2.06 / 2.08  
 1%(obs/new) = 0.75 / 0.73  
 5%(obs/new) = 0.91 / 0.87  
 25%(obs/new) = 1.46 / 1.47  
 75%(obs/new) = 2.87 / 2.94  
 95%(obs/new) = 4.06 / 4.14  
 99%(obs/new) = 4.54 / 4.51

Sample 216.1

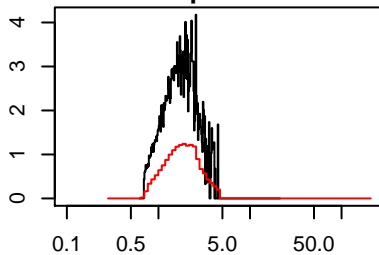

Sample 216.1 cumulative

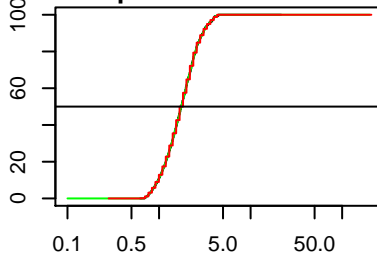

Sample statistics  
 Mass conserved = 1  
 Median(obs/new) = 1.74 / 1.75  
 1%(obs/new) = 0.73 / 0.73  
 5%(obs/new) = 0.86 / 0.87  
 25%(obs/new) = 1.28 / 1.24  
 75%(obs/new) = 2.33 / 2.27  
 95%(obs/new) = 3.49 / 3.49  
 99%(obs/new) = 4.06 / 4.14

Sample 217.13

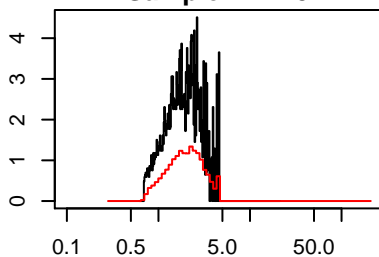

Sample 217.13 cumulative

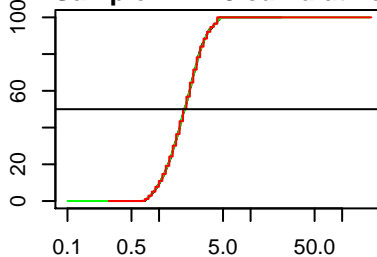

Sample statistics  
 Mass conserved = 1  
 Median(obs/new) = 1.89 / 1.91  
 1%(obs/new) = 0.73 / 0.73  
 5%(obs/new) = 0.87 / 0.87  
 25%(obs/new) = 1.38 / 1.35  
 75%(obs/new) = 2.57 / 2.7  
 95%(obs/new) = 3.84 / 3.8  
 99%(obs/new) = 4.41 / 4.51

Sample 218.2

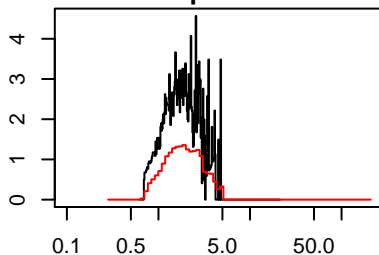

Sample 218.2 cumulative

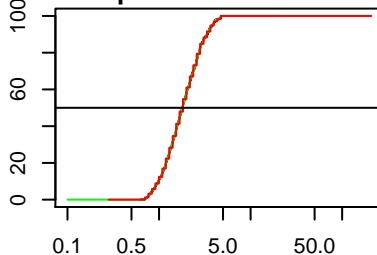

Sample statistics  
 Mass conserved = 1  
 Median(obs/new) = 1.79 / 1.75  
 1%(obs/new) = 0.73 / 0.73  
 5%(obs/new) = 0.85 / 0.87  
 25%(obs/new) = 1.28 / 1.24  
 75%(obs/new) = 2.57 / 2.47  
 95%(obs/new) = 3.84 / 3.8  
 99%(obs/new) = 4.54 / 4.51

Sample 218.31

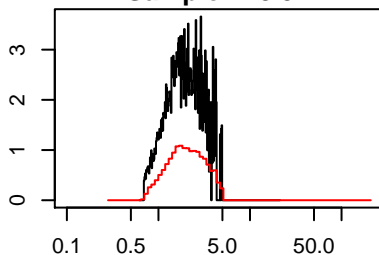

Sample 218.31 cumulative

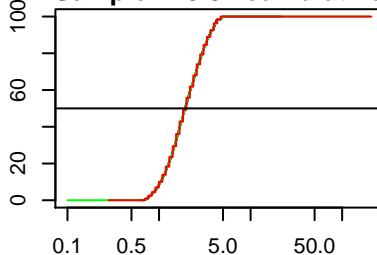

Sample statistics  
 Mass conserved = 1  
 Median(obs/new) = 1.92 / 1.91  
 1%(obs/new) = 0.74 / 0.73  
 5%(obs/new) = 0.9 / 0.87  
 25%(obs/new) = 1.4 / 1.35  
 75%(obs/new) = 2.75 / 2.7  
 95%(obs/new) = 4.06 / 4.14  
 99%(obs/new) = 4.73 / 4.51

Sample 220.32

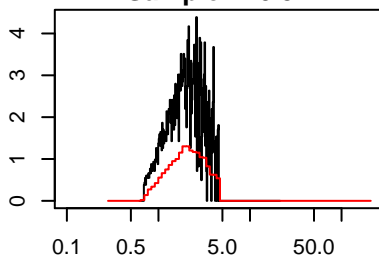

Sample 220.32 cumulative

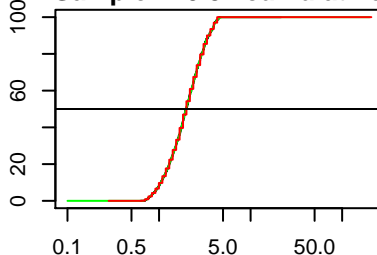

Sample statistics  
 Mass conserved = 1  
 Median(obs/new) = 1.97 / 1.91  
 1%(obs/new) = 0.74 / 0.73  
 5%(obs/new) = 0.9 / 0.87  
 25%(obs/new) = 1.42 / 1.35  
 75%(obs/new) = 2.72 / 2.7  
 95%(obs/new) = 3.95 / 3.8  
 99%(obs/new) = 4.47 / 4.51

Sample 221.74

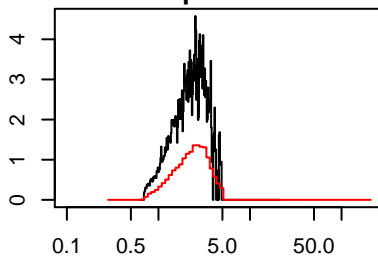

Sample 221.74 cumulative

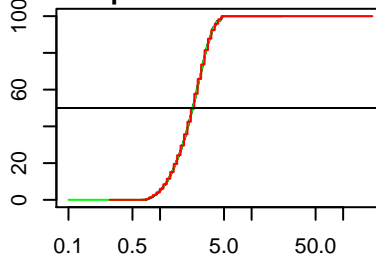

```
Sample statistics
Mass conserved = 1
Median(obs/new) = 2.27 / 2.27
1%(obs/new) = 0.77 / 0.8
5%(obs/new) = 1 / 0.95
25%(obs/new) = 1.63 / 1.61
75%(obs/new) = 2.95 / 2.94
95%(obs/new) = 4 / 4.14
99%(obs/new) = 4.66 / 4.51
```

Sample 222.22

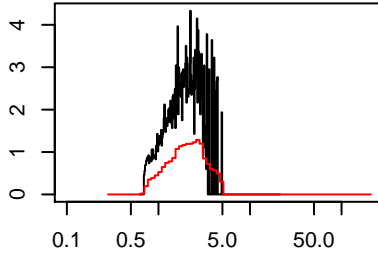

Sample 222.22 cumulative

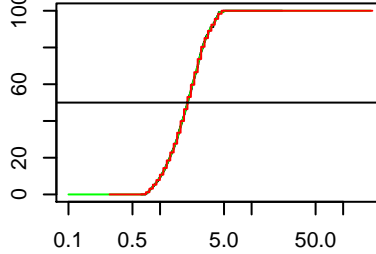

```
Sample statistics
Mass conserved = 1
Median(obs/new) = 2 / 2.08
1%(obs/new) = 0.73 / 0.73
5%(obs/new) = 0.86 / 0.87
25%(obs/new) = 1.42 / 1.35
75%(obs/new) = 2.72 / 2.7
95%(obs/new) = 4 / 4.14
99%(obs/new) = 4.41 / 4.51
```

Sample 223.175

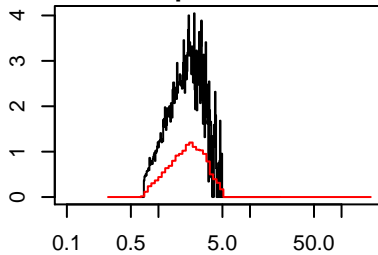

Sample 223.175 cumulative

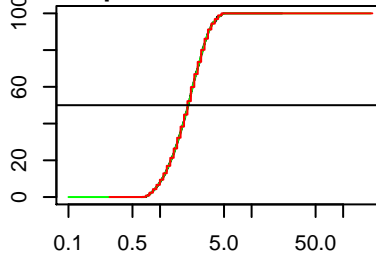

```
Sample statistics
Mass conserved = 1
Median(obs/new) = 2.03 / 2.08
1%(obs/new) = 0.75 / 0.73
5%(obs/new) = 0.9 / 0.87
25%(obs/new) = 1.44 / 1.47
75%(obs/new) = 2.75 / 2.7
95%(obs/new) = 3.79 / 3.8
99%(obs/new) = 4.66 / 4.51
```

Sample 224.74

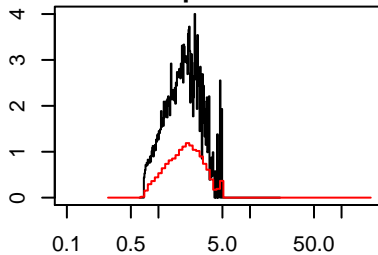

Sample 224.74 cumulative

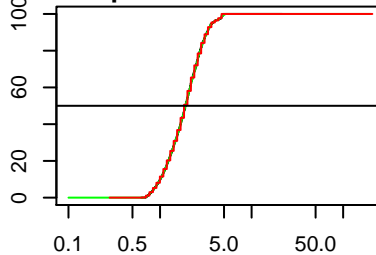

```
Sample statistics
Mass conserved = 1
Median(obs/new) = 1.89 / 1.91
1%(obs/new) = 0.73 / 0.73
5%(obs/new) = 0.86 / 0.87
25%(obs/new) = 1.34 / 1.35
75%(obs/new) = 2.57 / 2.47
95%(obs/new) = 3.74 / 3.8
99%(obs/new) = 4.73 / 4.91
```

Sample 226.56

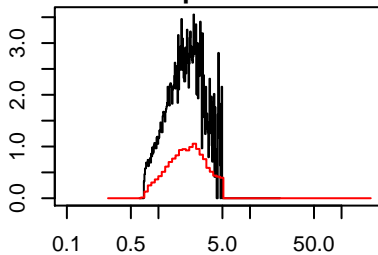

Sample 226.56 cumulative

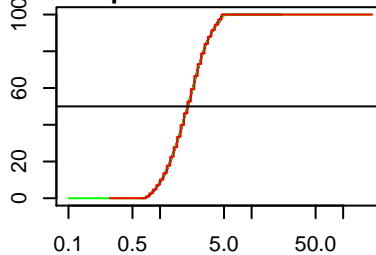

```
Sample statistics
Mass conserved = 1
Median(obs/new) = 2 / 2.08
1%(obs/new) = 0.74 / 0.73
5%(obs/new) = 0.88 / 0.87
25%(obs/new) = 1.42 / 1.35
75%(obs/new) = 2.79 / 2.7
95%(obs/new) = 4.17 / 4.14
99%(obs/new) = 4.73 / 4.91
```

Sample 228.06

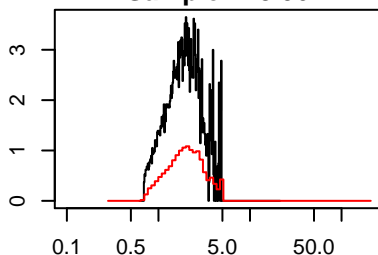

Sample 228.06 cumulative

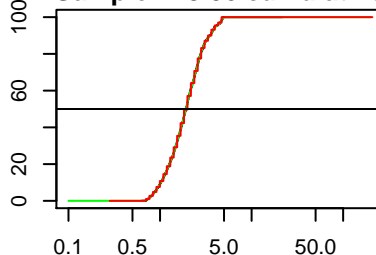

```
Sample statistics
Mass conserved = 1
Median(obs/new) = 1.92 / 1.91
1%(obs/new) = 0.74 / 0.73
5%(obs/new) = 0.88 / 0.87
25%(obs/new) = 1.38 / 1.35
75%(obs/new) = 2.61 / 2.7
95%(obs/new) = 3.95 / 4.14
99%(obs/new) = 4.79 / 4.91
```

Sample 230.07

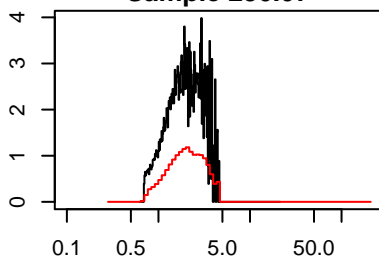

Sample 230.07 cumulative

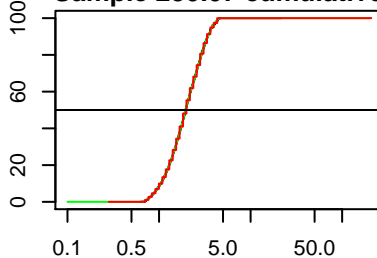

Sample statistics  
 Mass conserved = 1  
 Median(obs/new) = 1.95 / 1.91  
 1%(obs/new) = 0.74 / 0.73  
 5%(obs/new) = 0.88 / 0.87  
 25%(obs/new) = 1.4 / 1.35  
 75%(obs/new) = 2.72 / 2.7  
 95%(obs/new) = 3.79 / 3.8  
 99%(obs/new) = 4.35 / 4.51

Sample 233.08

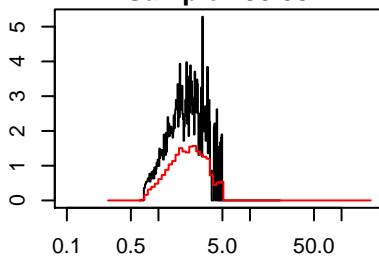

Sample 233.08 cumulative

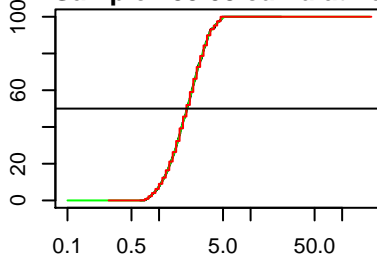

Sample statistics  
 Mass conserved = 1  
 Median(obs/new) = 2.03 / 2.08  
 1%(obs/new) = 0.75 / 0.73  
 5%(obs/new) = 0.91 / 0.87  
 25%(obs/new) = 1.46 / 1.47  
 75%(obs/new) = 2.79 / 2.7  
 95%(obs/new) = 4.12 / 4.14  
 99%(obs/new) = 4.86 / 4.91

Sample 233.6

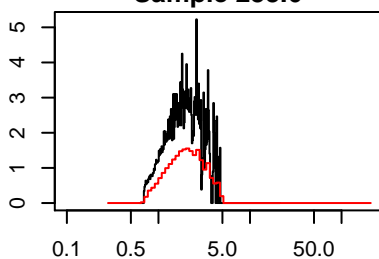

Sample 233.6 cumulative

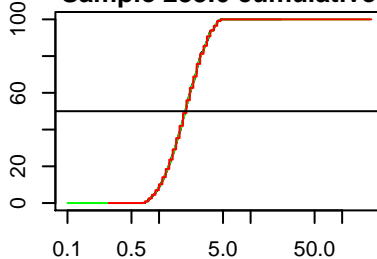

Sample statistics  
 Mass conserved = 1  
 Median(obs/new) = 1.95 / 1.91  
 1%(obs/new) = 0.74 / 0.73  
 5%(obs/new) = 0.9 / 0.87  
 25%(obs/new) = 1.38 / 1.35  
 75%(obs/new) = 2.64 / 2.7  
 95%(obs/new) = 4 / 3.8  
 99%(obs/new) = 4.35 / 4.51

Sample 235.35

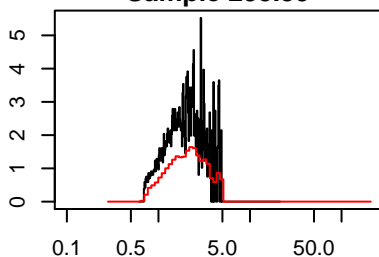

Sample 235.35 cumulative

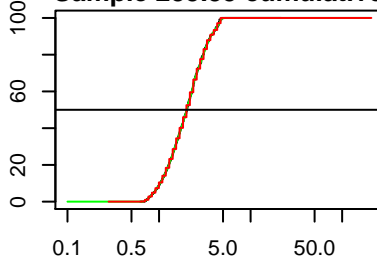

Sample statistics  
 Mass conserved = 1  
 Median(obs/new) = 2 / 2.08  
 1%(obs/new) = 0.74 / 0.73  
 5%(obs/new) = 0.88 / 0.87  
 25%(obs/new) = 1.4 / 1.35  
 75%(obs/new) = 2.83 / 2.94  
 95%(obs/new) = 4.29 / 4.14  
 99%(obs/new) = 4.6 / 4.91

Sample 235.64

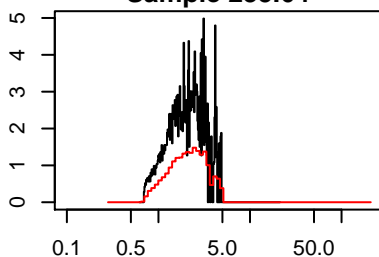

Sample 235.64 cumulative

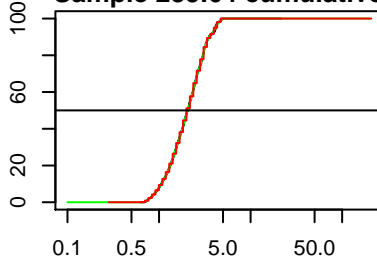

Sample statistics  
 Mass conserved = 1  
 Median(obs/new) = 2.06 / 2.08  
 1%(obs/new) = 0.74 / 0.73  
 5%(obs/new) = 0.9 / 0.87  
 25%(obs/new) = 1.44 / 1.47  
 75%(obs/new) = 2.83 / 2.94  
 95%(obs/new) = 4.17 / 4.14  
 99%(obs/new) = 4.79 / 4.51

5/25/50/75/95 percentiles

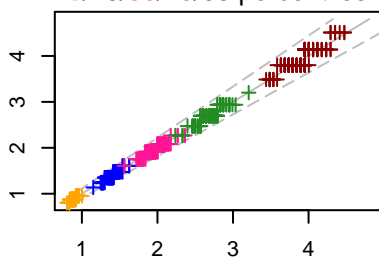

Vostok-BH7 percentiles

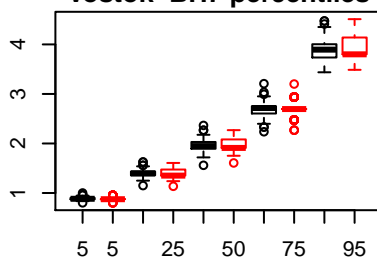

Site statistics  
 Percentiles Pearson's corr. = 0.896  
 Mean normalized bias = 0
