# Supplementary material for: Twelve thousand years of dust: the Holocene global dust cycle constrained by natural archives
Source: Copernicus journal article supplement (doi:10.5194/cp-11-869-2015), 2015-06-11
Supplement: Supplementary file 59 [file cp-11-869-2015-supplement.zip]

## LRC

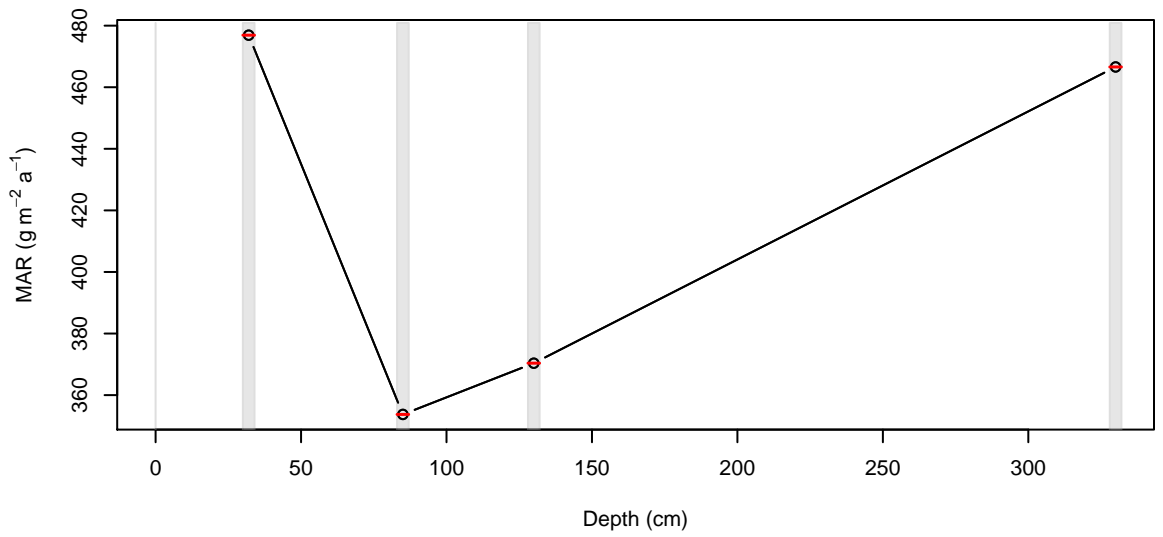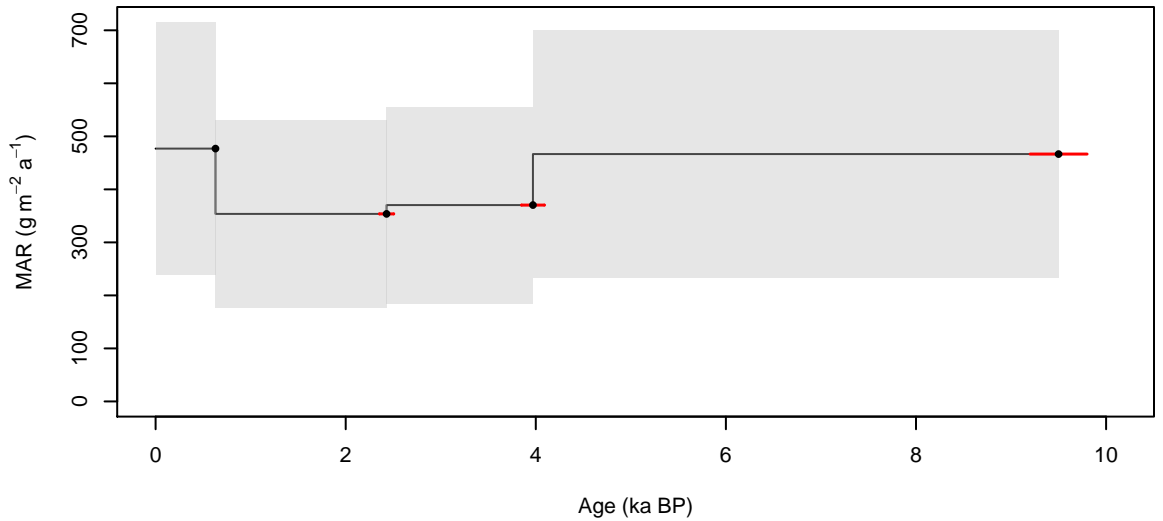

LRC

Reference: Miao et al., 2007

Depth: OSL ages from depth interval few cm thick, provided by X. Miao

Age: Ages are bottom ages for the sections. OSL.

Age error: From OSL

SBMAR: LSR\*DBD, with LSR for each soil horizon

SBMAR err: From LSR and DBD

DBD: Assume it is 1.45 g/cm<sup>3</sup> (Bettis et al., 2003)

DBD err: Assume it is 15% (Kohefled and Harrison, 2003)

EC: Assume it is 1, organic content negligible
