# Supplementary material for: Twelve thousand years of dust: the Holocene global dust cycle constrained by natural archives
Source: Copernicus journal article supplement (doi:10.5194/cp-11-869-2015), 2015-06-11
Supplement: Supplementary file 60 [file cp-11-869-2015-supplement.zip]

# 138-852A-1H-1

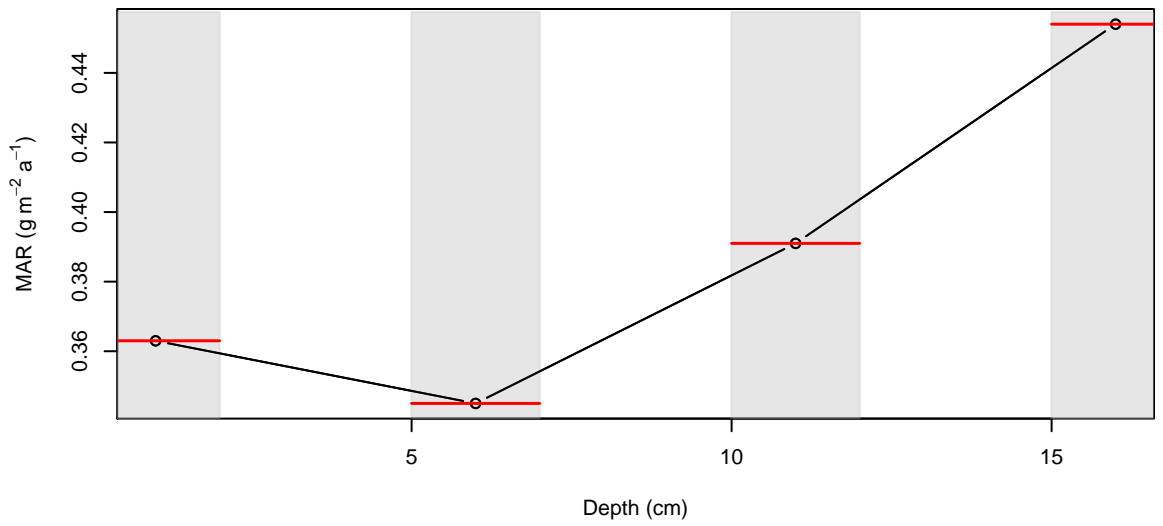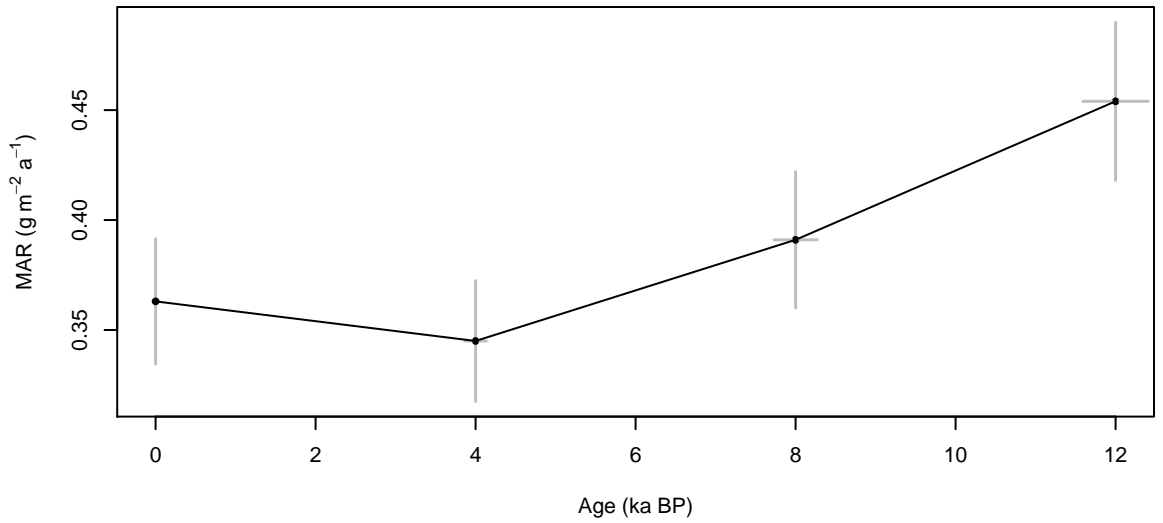

138-852A-1H-1

Reference: McGee et al. 2007

Depth: given in paper.

Age: from  $\delta 18O$ . Age reported as TOP, approximating to center.

Age error: assuming 6.8%

SBMAR:  $^{230}Th$

SBMAR error: assuming 5%

EC: based on  $^{232}Th$ , assuming 10.7 ppm in dust

EC error: assume 15%, including analytical + proxy uncertainty 1/10.7, McGee et al. 2007
