# Supplementary material for: Twelve thousand years of dust: the Holocene global dust cycle constrained by natural archives
Source: Copernicus journal article supplement (doi:10.5194/cp-11-869-2015), 2015-06-11
Supplement: Supplementary file 61 [file cp-11-869-2015-supplement.zip]

## RC24-01

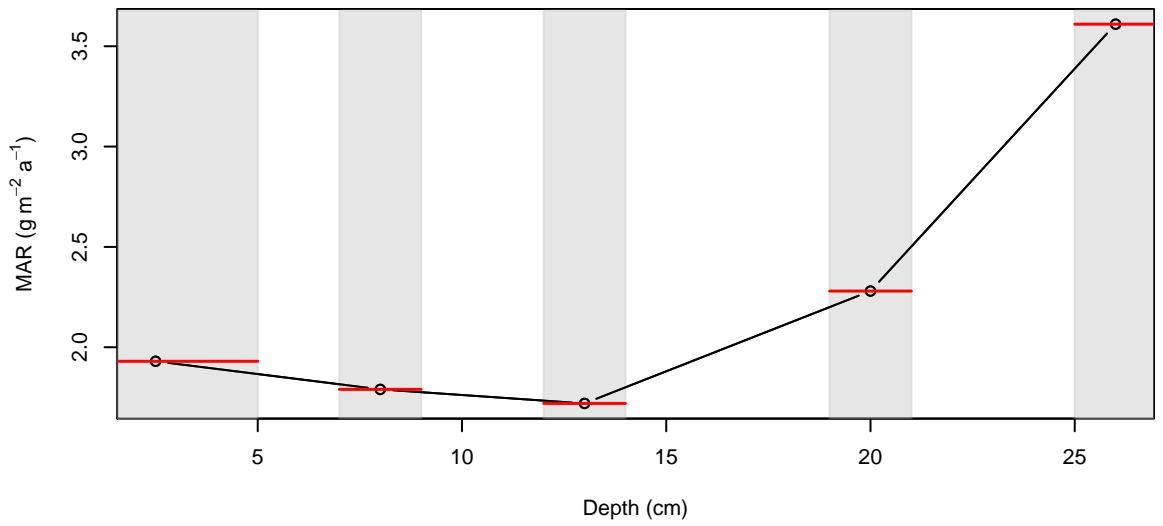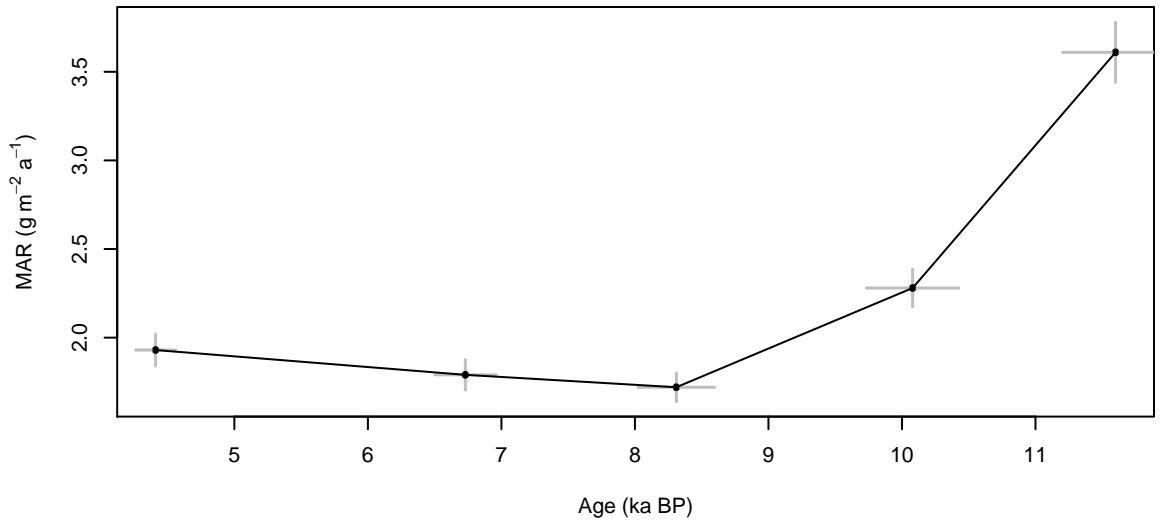

RC24-01

Reference: Bradtmiller et al. 2007

Depth: Depth intervals NOT specified in paper: assume 2cm

Age: Assuming age is center. Age is d180

Age error: assume 6.8% (1 sigma)

SBMAR: 230Th

SBMAR err: assume 5% (1 sigma)

EC: 232Th-based dust concentration (10.0 ppm 230Th in dust; 1/0.242530074 dpm -> ppm)

EC err: assume 15% (1 sigma). Includes 232Th analytical error and error in 232Th as dust proxy
