# Supplementary material for: Twelve thousand years of dust: the Holocene global dust cycle constrained by natural archives
Source: Copernicus journal article supplement (doi:10.5194/cp-11-869-2015), 2015-06-11
Supplement: Supplementary file 62 [file cp-11-869-2015-supplement.zip]

## **Supplementary information**

Includes supplementary table, figures, and reference list

**Supplementary Table.** List of records identified as relevant for the database (see Section 3 in the main text), and their classification in terms of confidence level (high, medium, low). The identification of the sources of uncertainty (according to the criteria discussed in the main text) is made explicit. Uncertainties are labeled as either substantial (x) or critical (xx).

**Supplementary Figures.** Comparison of simulated dust deposition ( $\text{g/m}^2/\text{a}$ ) for the 6 ka BP case, compared to observational estimates of the fine ( $< 10 \mu\text{m}$ ) eolian Mass Accumulation Rate for the corresponding periods, based on a 2 ka pace. (a) Observations; (b) model; (c) model versus observations scatterplot. Horizontal bars represent the variability of observational data averaged within the corresponding 2 ka time lapse (1 sigma). Locations of observational sites are clustered in the scatterplots based on their geographical location, as indicated by the color-coding. In the bottom scatterplot, squares indicate high confidence level, diamonds represent medium confidence level; (d) spatial distribution of the dominant sources for dust deposition. Figure S1: 2 ka BP. Figure S2: 4 ka BP. Figure S3: 6 ka BP. Figure S4: 8 ka BP. Figure S5: 10 ka BP.

Supplementary Table

| Site / area      | Archive          | Confidence level | Age model / SBMAR | Determination of EC | Separation of remote vs local | Sources of uncertainty                      | Reference                                          | Additional references      |
|------------------|------------------|------------------|-------------------|---------------------|-------------------------------|---------------------------------------------|----------------------------------------------------|----------------------------|
| EDC              | ice core         | high             |                   |                     |                               |                                             | Delmonte et al., 2004                              |                            |
| Vostok-BH7       | ice core         | high             |                   |                     |                               |                                             | Delmonte et al., 2004                              |                            |
| GISP2            | ice core         | medium           |                   | x                   |                               | calcium proxy                               | Mayewski et al., 1997                              | Ruth et al., 2002, 2008    |
| EN06601-0038PG   | marine core      | high             |                   |                     |                               |                                             | Francois et al., 1990                              |                            |
| EN06601-0021PG   | marine core      | high             |                   |                     |                               |                                             | Francois et al., 1990                              |                            |
| EN06601-0029PG   | marine core      | high             |                   |                     |                               |                                             | Francois et al., 1990                              |                            |
| OC437-07-GC27    | marine core      | medium           |                   | x                   |                               | possible unaccounted for, non-eolian inputs | McGee et al., 2013                                 |                            |
| OC437-07-GC37    | marine core      | high             |                   |                     |                               |                                             | McGee et al., 2013                                 |                            |
| OC437-07-GC49    | marine core      | high             |                   |                     |                               |                                             | McGee et al., 2013                                 |                            |
| OC437-07-GC66    | marine core      | medium           |                   | x                   |                               | possible unaccounted for, non-eolian inputs | McGee et al., 2013                                 |                            |
| OC437-07-GC68    | marine core      | high             |                   |                     |                               |                                             | McGee et al., 2013                                 |                            |
| RC24-12          | marine core      | high             |                   |                     |                               |                                             | Bradtmitter et al., 2006                           |                            |
| RC24-07          | marine core      | high             |                   |                     |                               |                                             | Bradtmitter et al., 2006                           |                            |
| RC24-01          | marine core      | high             |                   |                     |                               |                                             | Bradtmitter et al., 2006                           |                            |
| V22-182          | marine core      | high             |                   |                     |                               |                                             | Bradtmitter et al., 2006                           |                            |
| V30-40           | marine core      | high             |                   |                     |                               |                                             | Bradtmitter et al., 2006                           |                            |
| PS2498-1         | marine core      | medium           |                   | x                   |                               | possible non-local / non-eolian inputs      | Anderson et al., 2014                              | Kohfeld and Harrison, 2001 |
| RC27-42          | marine core      | high             |                   |                     |                               |                                             | Pourmand et al., 2007                              |                            |
| 93KL             | marine core      | medium           |                   | x                   |                               | possible non-eolian inputs                  | Pourmand et al., 2004                              |                            |
| ODP138-848B-1H-1 | marine core      | medium           | x                 |                     |                               | stratigraphic correlation age model         | McGee et al., 2007                                 |                            |
| ODP138-849A-1H-1 | marine core      | medium           | x                 |                     |                               | stratigraphic correlation age model         | McGee et al., 2007                                 |                            |
| ODP138-850A-1H-1 | marine core      | medium           | x                 |                     |                               | stratigraphic correlation age model         | McGee et al., 2007                                 |                            |
| ODP138-851E-1H-1 | marine core      | medium           | x                 |                     |                               | stratigraphic correlation age model         | McGee et al., 2007                                 |                            |
| ODP138-852A-1H-1 | marine core      | medium           | x                 |                     |                               | stratigraphic correlation age model         | McGee et al., 2007                                 |                            |
| ODP138-853B-1H-1 | marine core      | medium           | x                 |                     |                               | stratigraphic correlation age model         | McGee et al., 2007                                 |                            |
| TT013-PC72       | marine core      | high             |                   |                     |                               |                                             | Anderson et al., 2006                              |                            |
| TT013-MC27       | marine core      | high             |                   |                     |                               |                                             | Anderson et al., 2006                              |                            |
| TT013-MC69       | marine core      | high             |                   |                     |                               |                                             | Anderson et al., 2006                              |                            |
| TT013-MC97       | marine core      | high             |                   |                     |                               |                                             | Anderson et al., 2006                              |                            |
| TT013-MC19       | marine core      | high             |                   |                     |                               |                                             | Anderson et al., 2006                              |                            |
| V28-203          | marine core      | high             |                   |                     |                               |                                             | Bradtmitter et al., 2007                           |                            |
| V21-146          | marine core      | medium           | x                 |                     |                               | age model                                   | Hovan et al., 1991                                 |                            |
| SO-14-08-05      | marine core      | medium           | x                 |                     |                               | age model                                   | Hesse and McTainsh, 2003; Fitzsimmons et al., 2013 |                            |
| E26.1            | marine core      | medium           | x                 |                     |                               | age model                                   | Hesse, 1994; Fitzsimmons et al., 2013              |                            |
| Zagoskin_Lake    | lake             | medium           | x                 |                     |                               | age model                                   | Muhs et al., 2003b                                 |                            |
| Chitina          | loess / paleosol | medium           | x                 |                     |                               | age model                                   | Muhs et al., 2013                                  |                            |
| Luochuan, China  | loess / paleosol | medium           | x                 |                     |                               | Age model                                   | Lu et al., 2013                                    |                            |
| Jiuzhoutai       | loess / paleosol | medium           | x                 |                     |                               | age model                                   | Kohfeld and Harrison, 2003                         |                            |

|                                  |                     |        |    |    |    |                                                                                  |                                           |                                                                      |
|----------------------------------|---------------------|--------|----|----|----|----------------------------------------------------------------------------------|-------------------------------------------|----------------------------------------------------------------------|
| Duowa                            | loess /<br>paleosol | medium | x  |    |    | age model                                                                        | Roberts et al., 2001                      |                                                                      |
| Beiguoyuan                       | loess /<br>paleosol | medium | x  |    |    | age model                                                                        | Stevens and Lu, 2009                      |                                                                      |
| Xifeng                           | loess /<br>paleosol | medium | x  |    |    | age model                                                                        | Stevens and Lu, 2009                      |                                                                      |
| Jingyuan                         | loess /<br>paleosol | medium | x  |    |    | age model                                                                        | Sun et al., 2012                          |                                                                      |
| Weinan                           | loess /<br>paleosol | medium | x  |    |    | age model                                                                        | Kang et al., 2013                         |                                                                      |
| OWR                              | loess /<br>paleosol | medium | x  |    |    | age model                                                                        | Miao et al., 2007                         |                                                                      |
| LRC                              | loess /<br>paleosol | medium | x  |    |    | age model                                                                        | Miao et al., 2007                         |                                                                      |
| Dome B                           | ice core            | low    | xx |    |    | age model                                                                        | Delmonte et al., 2004                     | Jouzel et al., 1995                                                  |
| TALDICE                          | ice core            | low    |    |    | xx | local sources                                                                    | Albani et al., 2012                       | Delmonte et al., 2010;<br>Delmonte et al., 2013                      |
| Siple Dome                       | ice core            | low    |    | x  | x  | calcium proxy, possible local sources                                            | Mayewski et al., 2013                     | Ruth et al., 2002, 2008;<br>Delmonte et al., 2013; Bory et al., 2010 |
| Taylor Dome                      | ice core            | low    |    | x  | x  | calcium proxy, possible local sources                                            | Mayewski et al., 2013                     | Ruth et al., 2002, 2008;<br>Delmonte et al., 2013; Bory et al., 2010 |
| Byrd                             | ice core            | low    |    | x  | x  | old particle counter data, possible local sources                                | Thompson et al., 1975, 1977               | Delmonte et al., 2013; Bory et al., 2010                             |
| EDML                             | ice core            | low    |    | x  | x  | calcium proxy, possible local sources                                            | Fischer et al., 2007                      | Ruth et al., 2002, 2008;<br>Delmonte et al., 2013; Bory et al., 2010 |
| Dome Fuji                        | ice core            | low    |    | xx |    | uncalibrated laser counter                                                       | Kawamura et al., 2003; Fujii et al., 2003 |                                                                      |
| Camp Century                     | ice core            | low    |    | x  | x  | old particle counter data, possible local sources                                | Thompson et al., 1975, 1977               | Hansson, 1994; Bullard, 2013                                         |
| Penny Ice Cap                    | ice core            | low    | xx |    | x  | age model, local sources                                                         | Zdanowicz et al., 2000                    | C. Zdanowicz, personal comm.                                         |
| Dunde                            | ice core            | low    | xx |    |    | age model                                                                        | Thompson et al., 1997                     | L. G. Thompson, personal comm.                                       |
| Guliya                           | ice core            | low    | xx |    |    | age model                                                                        | Wu et al., 2004                           | L. G. Thompson, personal comm.                                       |
| Puruogangri                      | ice core            | low    | xx |    |    | age model                                                                        | Thompson et al., 2006                     | L. G. Thompson, personal comm.                                       |
| Huascarán                        | ice core            | low    | xx |    | x  | age model, local sources                                                         | Thompson et al., 1995                     | L. G. Thompson, personal comm.                                       |
| Sajama                           | ice core            | low    | xx |    |    | age model                                                                        | Thompson et al., 1998                     | L. G. Thompson, personal comm.                                       |
| Kilimajaro                       | ice core            | low    | xx | x  | x  | age model, local sources, volcanic input                                         | Thompson et al., 2002                     | Gabrielli et al., 2014; L. G. Thompson, personal comm.               |
| Nevado Illimani                  | ice core            | low    | xx |    |    | age model                                                                        | Ramirez et al., 2003                      | J.-R. Petit, personal comm.                                          |
| ODP108-658C                      | marine core         | low    |    | xx |    | unaccounted for, non-eolian inputs                                               | Adkins et al., 2006                       | McGee et al., 2013                                                   |
| SU81-18 (Iberian Margin)         | marine core         | low    |    | xx |    | non-eolian inputs                                                                | Gherardi et al., 2005                     |                                                                      |
| OCE326-GGC5 (North Atlantic)     | marine core         | low    |    | xx |    | non-eolian inputs                                                                | McManus et al., 2004                      | Kohfeld and Harrison, 2001                                           |
| KNR110-82GGC (Ceara Rise)        | marine core         | low    |    | xx |    | possible riverine inputs from the Amazon                                         | Francois et al., 1990                     | Ruddiman, 1997                                                       |
| KNR110-58GGC (Ceara Rise)        | marine core         | low    |    | xx |    | possible riverine inputs from the Amazon                                         | Francois et al., 1990                     | Ruddiman, 1997                                                       |
| KNR110-55GGC (Ceara Rise)        | marine core         | low    |    | xx |    | possible riverine inputs from the Amazon                                         | Francois et al., 1990                     | Ruddiman, 1997                                                       |
| RC13-189 (W Equatorial Atlantic) | marine core         | low    |    | xx |    | possible riverine inputs from the Amazon                                         | Bradtiller et al., 2006                   | Francois et al., 1990; Ruddiman, 1997                                |
| RC16-66 (W Equatorial Atlantic)  | marine core         | low    |    | xx |    | possible riverine inputs from the Amazon                                         | Bradtiller et al., 2006                   | Francois et al., 1990; Ruddiman, 1997                                |
| V22-177 (Equatorial Atlantic)    | marine core         | low    | xx |    |    | unconstrained sediment redistribution                                            | Ruddiman, 1997                            | Bradtiller et al. (2006); Francois et al., 1990                      |
| V29-144 (Equatorial Atlantic)    | marine core         | low    | xx | xx |    | unconstrained sediment redistribution; possible riverine inputs from Congo river | Ruddiman, 1997                            | Bradtiller et al. (2006); Francois et al., 1990                      |
| V30-41K (Equatorial Atlantic)    | marine core         | low    | xx |    |    | unconstrained sediment redistribution                                            | Ruddiman, 1997                            | Bradtiller et al. (2006); Francois et al., 1990                      |
| 9501 (E Mediterranean)           | marine core         | low    |    | xx |    | separation of riverine/eolian, no size                                           | Box et al., 2011                          |                                                                      |
| 9509 (E Mediterranean)           | marine core         | low    |    | xx |    | separation of riverine/eolian, no size                                           | Box et al., 2011                          |                                                                      |
| RC27-61 (Arabian Sea)            | marine core         | low    | xx |    |    | age model                                                                        | Clemens and Prell, 1990                   |                                                                      |
| ODP117-722B (Arabian Sea)        | marine core         | low    | xx |    |    | age model                                                                        | Clemens and Prell, 1990                   |                                                                      |

|                                  |             |     |   |    |  |                                             |                                                |                                                                     |
|----------------------------------|-------------|-----|---|----|--|---------------------------------------------|------------------------------------------------|---------------------------------------------------------------------|
| JPC17 (Bering Sea)               | marine core | low |   | xx |  | possible non-eolian/volcanic inputs         | Kohfeld and Chase, 2011; Brunelle et al., 2007 | Hovan and Rea, 1995; Serno et al., 2014; Kohfeld and Harrison, 2001 |
| PC13 (Bering Sea)                | marine core | low |   | xx |  | possible non-eolian/volcanic inputs         | Kohfeld and Chase, 2011; Brunelle et al., 2010 | Hovan and Rea, 1995; Serno et al., 2014; Kohfeld and Harrison, 2001 |
| RAMA 44 PC (Bering Sea)          | marine core | low |   | xx |  | possible non-eolian/volcanic inputs         | Kohfeld and Chase, 2011; Crusius et al., 2004  | Hovan and Rea, 1995; Serno et al., 2014; Kohfeld and Harrison, 2001 |
| ODP Site 887B (Bering Sea)       | marine core | low |   | xx |  | possible non-eolian/volcanic inputs         | Kohfeld and Chase, 2011; Jaccard et al., 2009  | Hovan and Rea, 1995; Serno et al., 2014; Kohfeld and Harrison, 2001 |
| ME0005-24JC (Panama Basin)       | marine core | low |   | xx |  | possible non-eolian/volcanic inputs         | Kienast et al., 2007                           | Olivarez et al., 1991                                               |
| Y69-71P (Panama Basin)           | marine core | low |   | xx |  | possible non-eolian/volcanic inputs         | Kienast et al., 2007                           | Olivarez et al., 1991                                               |
| P7 (Panama Basin)                | marine core | low |   | xx |  | possible non-eolian/volcanic inputs         | Kienast et al., 2007                           | Olivarez et al., 1991                                               |
| ME0005-27JC (Panama Basin)       | marine core | low |   | xx |  | possible non-eolian/volcanic inputs         | Kienast et al., 2007                           | Olivarez et al., 1991                                               |
| TR163-31P (Panama Basin)         | marine core | low |   | xx |  | possible non-eolian/volcanic inputs         | Kienast et al., 2007                           | Olivarez et al., 1991                                               |
| TR163-31B (E Eq. Pacific)        | marine core | low |   | xx |  | possible non-eolian/volcanic inputs         | Boven and Rea, 1998                            | Olivarez et al., 1991                                               |
| MD01-2407 (Japan Sea)            | marine core | low | x | x  |  | possible sediment focusing, riverine inputs | Nagashima et al., 2007                         |                                                                     |
| O3167 (Ontong-Java Plateau)      | marine core | low |   | xx |  | possible non-eolian inputs                  | Kawahata, 1999                                 |                                                                     |
| C2188 (Ontong-Java Plateau)      | marine core | low |   | xx |  | possible non-eolian inputs                  | Kawahata, 1999                                 |                                                                     |
| C4402 (Ontong-Java Plateau)      | marine core | low |   | xx |  | possible non-eolian inputs                  | Kawahata, 1999                                 |                                                                     |
| MD97-2138 (Ontong-Java Plateau)  | marine core | low |   | xx |  | possible non-eolian inputs                  | Bradtmitter et al., 2007                       | Kawahata, 1999                                                      |
| MW91-9 (Ontong-Java Plateau)     | marine core | low |   | xx |  | possible non-eolian inputs                  | Bradtmitter et al., 2007                       | Kawahata, 1999                                                      |
| MD91-BC36 (Ontong-Java Plateau)  | marine core | low |   | xx |  | possible non-eolian inputs                  | Bradtmitter et al., 2007                       | Kawahata, 1999                                                      |
| RC17-177                         | marine core | low |   | xx |  | possible non-eolian inputs                  | Bradtmitter et al., 2007                       | Kawahata, 1999                                                      |
| V20-122 (NW Pacific)             | marine core | low | x | xx |  | age model, possible non-eolian inputs       | Rea and Leinen, 1988                           | Hovan and Rea, 1995; Serno et al., 2014; D. Rea, personal comm.     |
| V20-126 (NW Pacific)             | marine core | low | x | xx |  | age model, possible non-eolian inputs       | Rea and Leinen, 1988                           | Hovan and Rea, 1995; Serno et al., 2014; D. Rea, personal comm.     |
| V20-129 (NW Pacific)             | marine core | low | x | xx |  | age model, possible non-eolian inputs       | Rea and Leinen, 1988                           | Hovan and Rea, 1995; Serno et al., 2014; D. Rea, personal comm.     |
| RC14-105 (NW Pacific)            | marine core | low | x | xx |  | age model, possible non-eolian inputs       | Rea and Leinen, 1988                           | Hovan and Rea, 1995; Serno et al., 2014; D. Rea, personal comm.     |
| NGC97 (Tasman Sea)               | marine core | low | x | x  |  | age model, aluminium proxy                  | Kawahata, 2000                                 |                                                                     |
| NGC99 (Tasman Sea)               | marine core | low | x | x  |  | age model, aluminium proxy                  | Kawahata, 2000                                 |                                                                     |
| E14-17 (Southern Ocean)          | marine core | low |   | xx |  | possible non-eolian inputs (IRD)            | Bradtmitter et al., 2009                       | Kohfeld and Harrison, 2001; Kohfeld et al., 2013                    |
| E15-4 (Southern Ocean)           | marine core | low |   | xx |  | possible non-eolian inputs (IRD)            | Bradtmitter et al., 2009                       | Kohfeld and Harrison, 2001; Kohfeld et al., 2013                    |
| E15-5 (Southern Ocean)           | marine core | low |   | xx |  | possible non-eolian inputs (IRD)            | Bradtmitter et al., 2009                       | Kohfeld and Harrison, 2001; Kohfeld et al., 2013                    |
| E15-28 (Southern Ocean)          | marine core | low |   | xx |  | possible non-eolian inputs (IRD)            | Bradtmitter et al., 2009                       | Kohfeld and Harrison, 2001; Kohfeld et al., 2013                    |
| E19-7 (Southern Ocean)           | marine core | low |   | xx |  | possible non-eolian inputs (IRD)            | Bradtmitter et al., 2009                       | Kohfeld and Harrison, 2001; Kohfeld et al., 2013                    |
| E27-23 (Southern Ocean)          | marine core | low |   | xx |  | possible non-eolian inputs (IRD)            | Bradtmitter et al., 2009                       | Kohfeld and Harrison, 2001; Kohfeld et al., 2013                    |
| E36-36 (Southern Ocean)          | marine core | low |   | xx |  | possible non-eolian inputs (IRD)            | Bradtmitter et al., 2009                       | Kohfeld and Harrison, 2001; Kohfeld et al., 2013                    |
| V16-121 (Southern Ocean)         | marine core | low |   | xx |  | possible non-eolian inputs (IRD)            | Bradtmitter et al., 2009                       | Kohfeld and Harrison, 2001; Kohfeld et al., 2013                    |
| Tongsu maar, Cheju Island, Korea | lake        | low |   | xx |  | quartz proxy                                | Lim and Matsumoto, 2008                        |                                                                     |
| Lake Biwa, Japan                 | lake        | low | x | xx |  | quartz proxy                                | Xiao et al., 1997                              |                                                                     |

|                                    |                  |     |    |   |    |                                                                                    |                                              |                         |
|------------------------------------|------------------|-----|----|---|----|------------------------------------------------------------------------------------|----------------------------------------------|-------------------------|
| Lake Huguang maar, China           | lake             | low | xx |   |    | inadequate temporal resolution for accumulation                                    | Yancheva et al., 2007                        | G. Haug, personal comm. |
| Native Companion Lagoon, Australia | lake             | low | x  |   | x  | age model, local sources                                                           | McGowan et al., 2008; Petherick et al., 2009 |                         |
| Elk Lake, Minnesota                | lake             | low |    | x | x  | aluminium proxy, no size, possible local sources                                   | Dean et al., 1997                            |                         |
| Hongyuan, Tibet                    | peat bog         | low |    | x | xx | dust proxy, separation of local/remote sources (size-dependent)                    | Ferrat et al., 2011                          |                         |
| Store Mosse, Sweden                | peat bog         | low |    | x | xx | dust proxy, separation of local/remote sources (size-dependent)                    | Kylander et al., 2013                        |                         |
| Old Man Range, New Zealand         | peat bog         | low |    | x | x  | dust proxy, separation of local/remote sources (size-dependent)                    | Marx et al., 2009                            |                         |
| Upper Snowy Mountains, Australia   | peat bog         | low |    | x | xx | dust proxy, separation of local/remote sources (size-dependent)                    | McGowan et al., 2010                         |                         |
| Etang de la Gruere, Switzerland    | peat bog         | low |    | x | xx | dust proxy, separation of local/remote sources (size-dependent)                    | Le Roux et al., 2012                         |                         |
| Isla Navarino, Chile               | peat bog         | low |    | x | xx | dust proxy, separation of local/remote sources (size-dependent)                    | Sapkota et al., 2007                         |                         |
| Baxie (Chinese Loess Plateau)      | loess / paleosol | low | xx | x |    | Section with potential local river sources                                         | Kohfeld and Harrison, 2003                   | Sun et al., 2000        |
| Halali (Chinese Loess Plateau)     | loess / paleosol | low | xx | x |    | Section with potential local sources from the lacustrine sediments of Qinghai Lake | Kohfeld and Harrison, 2003                   | Sun et al., 2000        |
| Yinwan (Chinese Loess Plateau)     | loess / paleosol | low | xx | x |    | Section with potential local river sources                                         | Kohfeld and Harrison, 2003                   | Sun et al., 2000        |
| Dadiwan (Chinese Loess Plateau)    | loess / paleosol | low | xx | x |    | Section with potential local river sources                                         | Kohfeld and Harrison, 2003                   | Sun et al., 2000        |
| Laoguantai, China                  | loess / paleosol | low | xx |   |    | lack of nearby sites in this compilation with matching horizon stratigraphy        | Jia et al., 2008                             |                         |

Figure S1

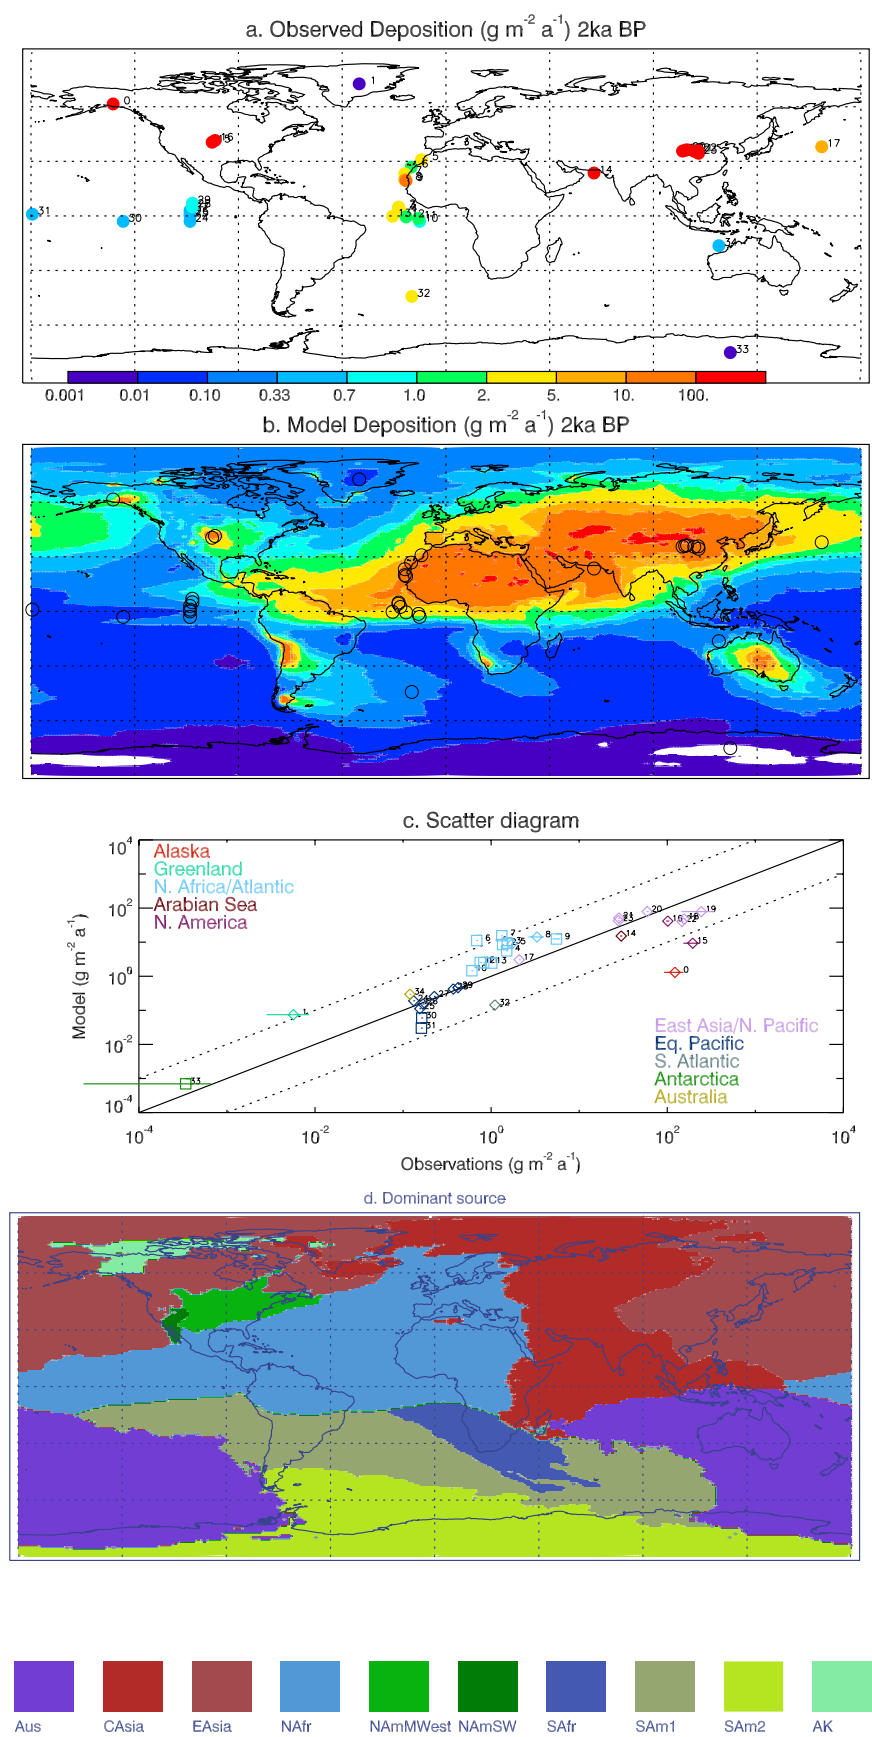

Figure S2

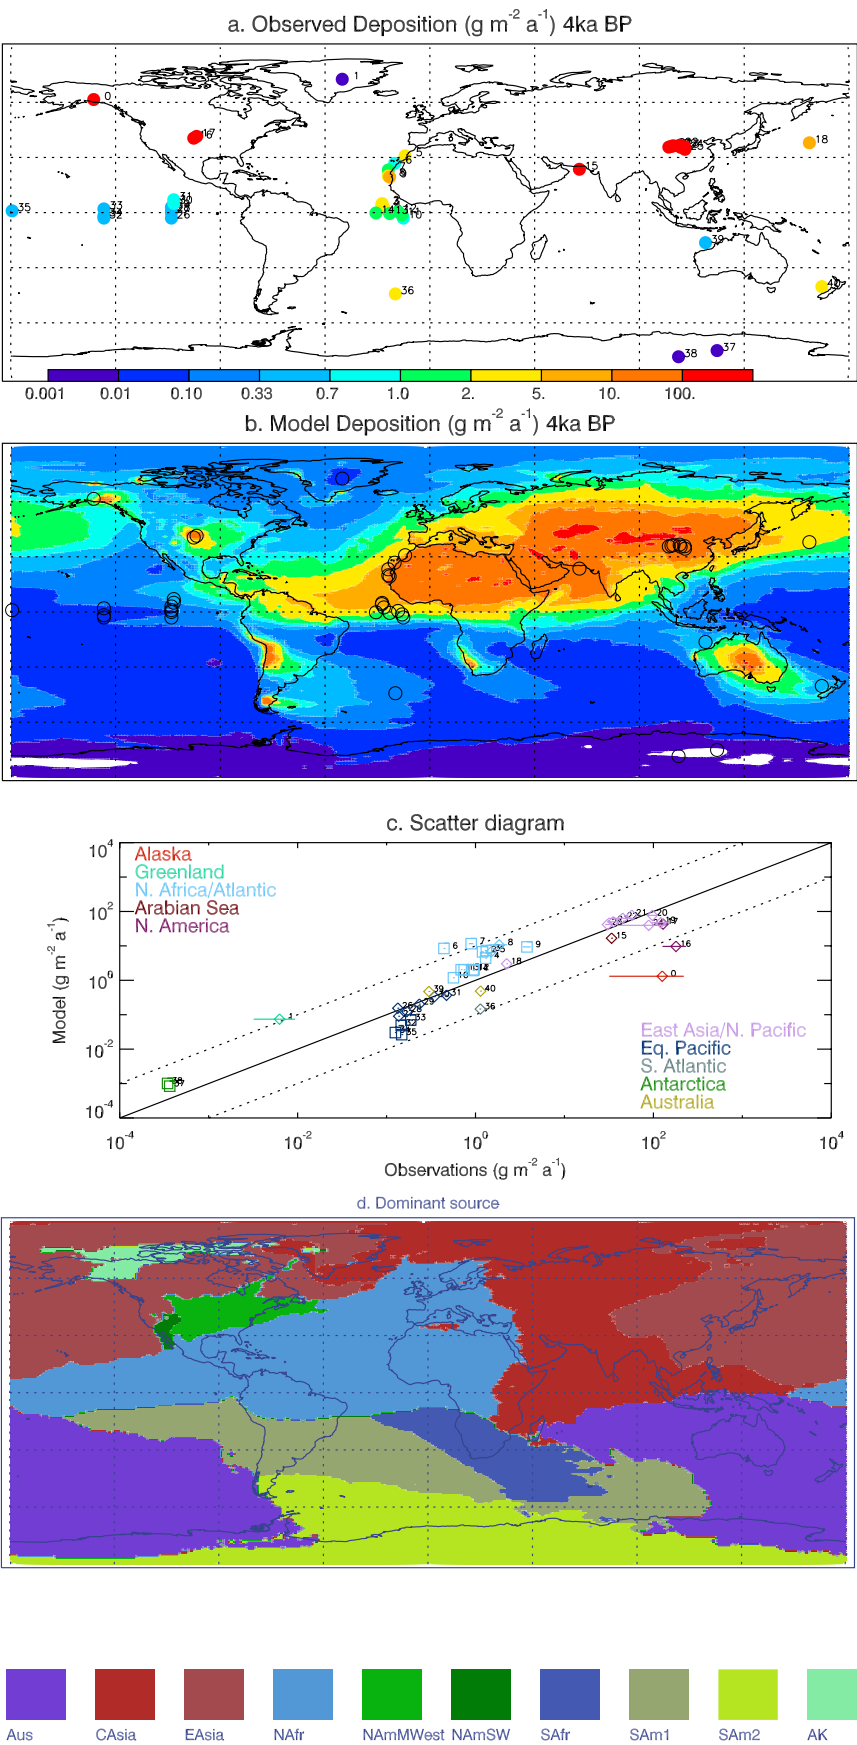

Figure S3

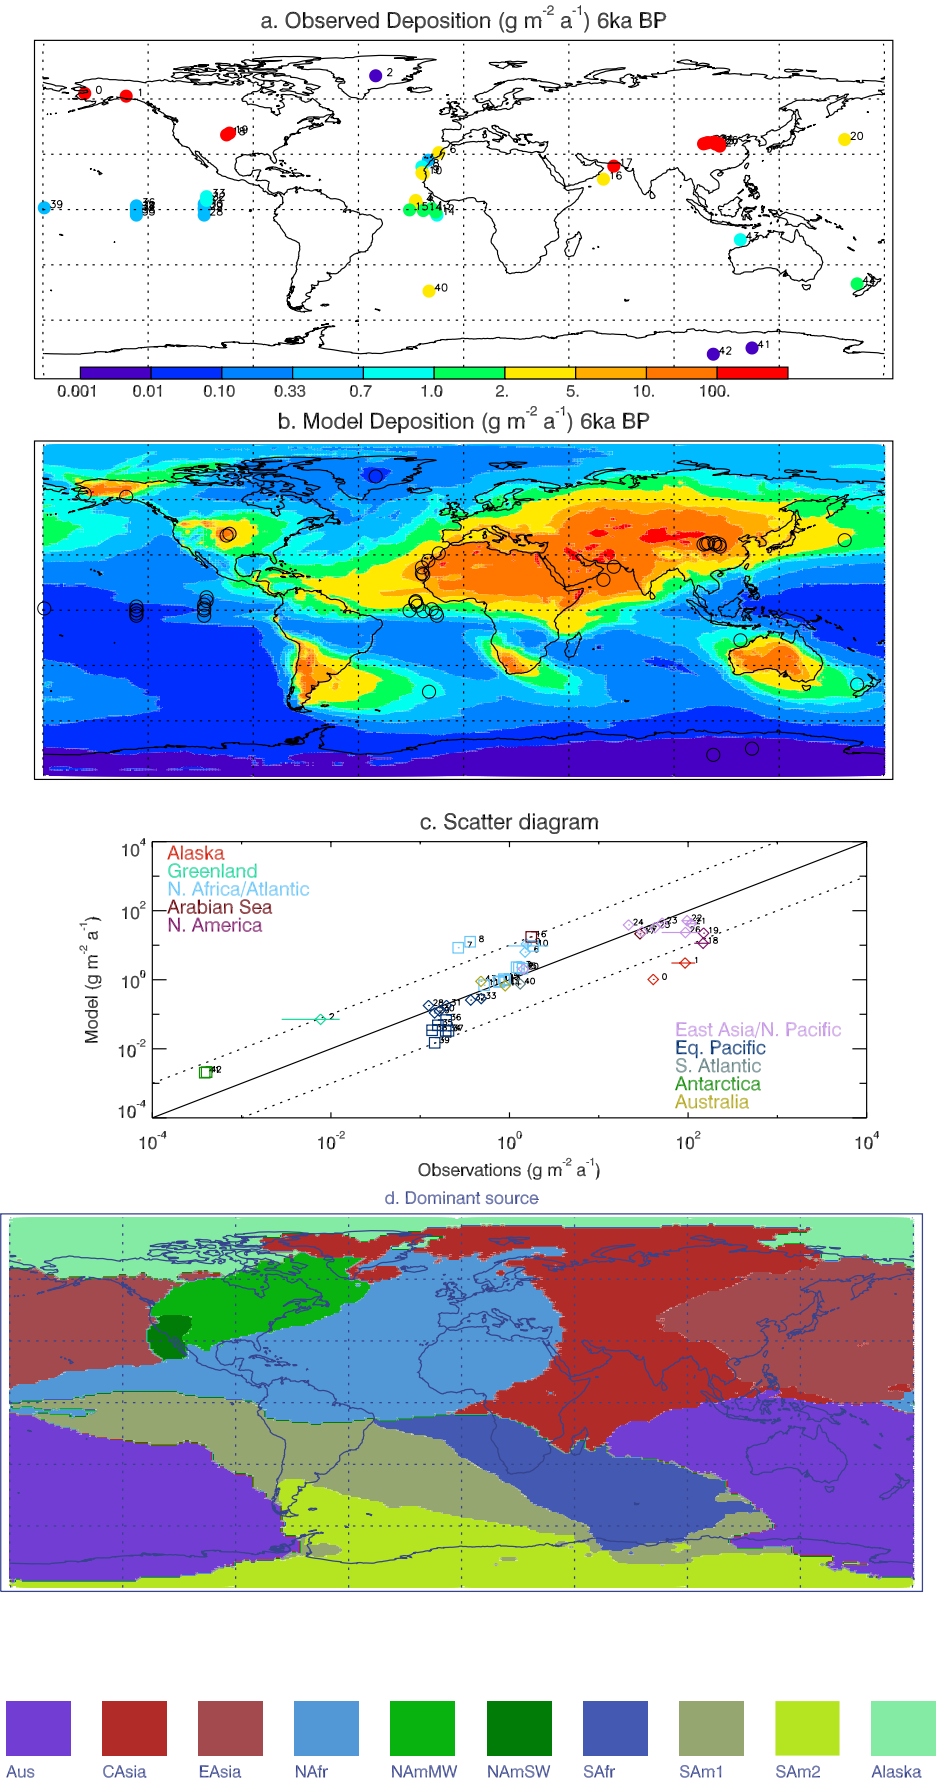



Figure S4

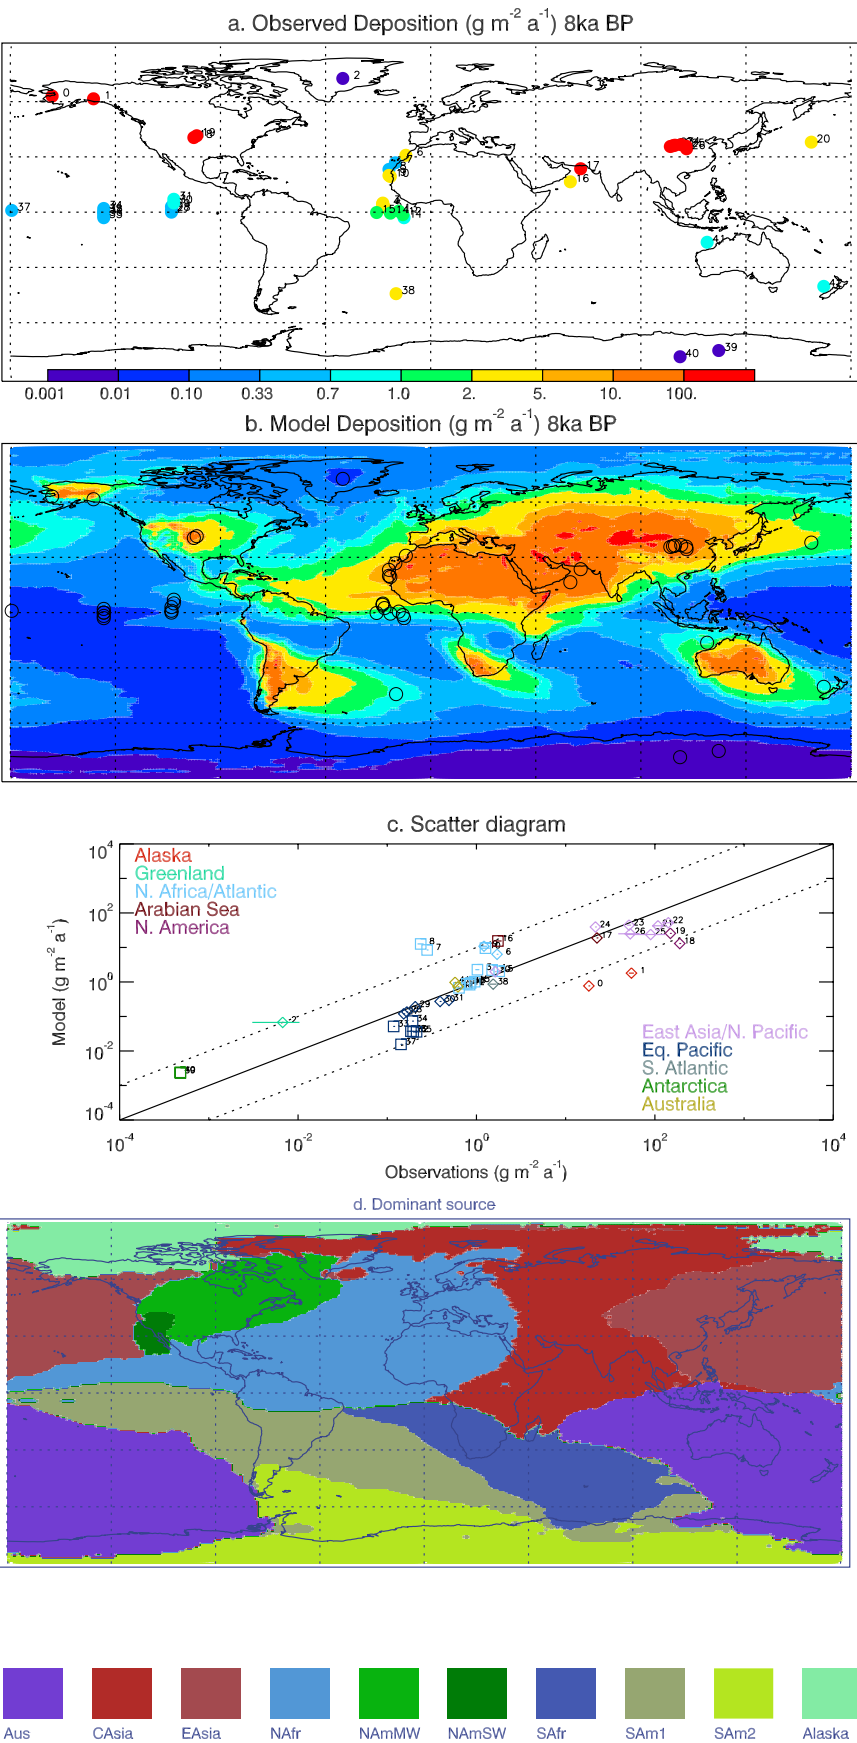

Figure S5

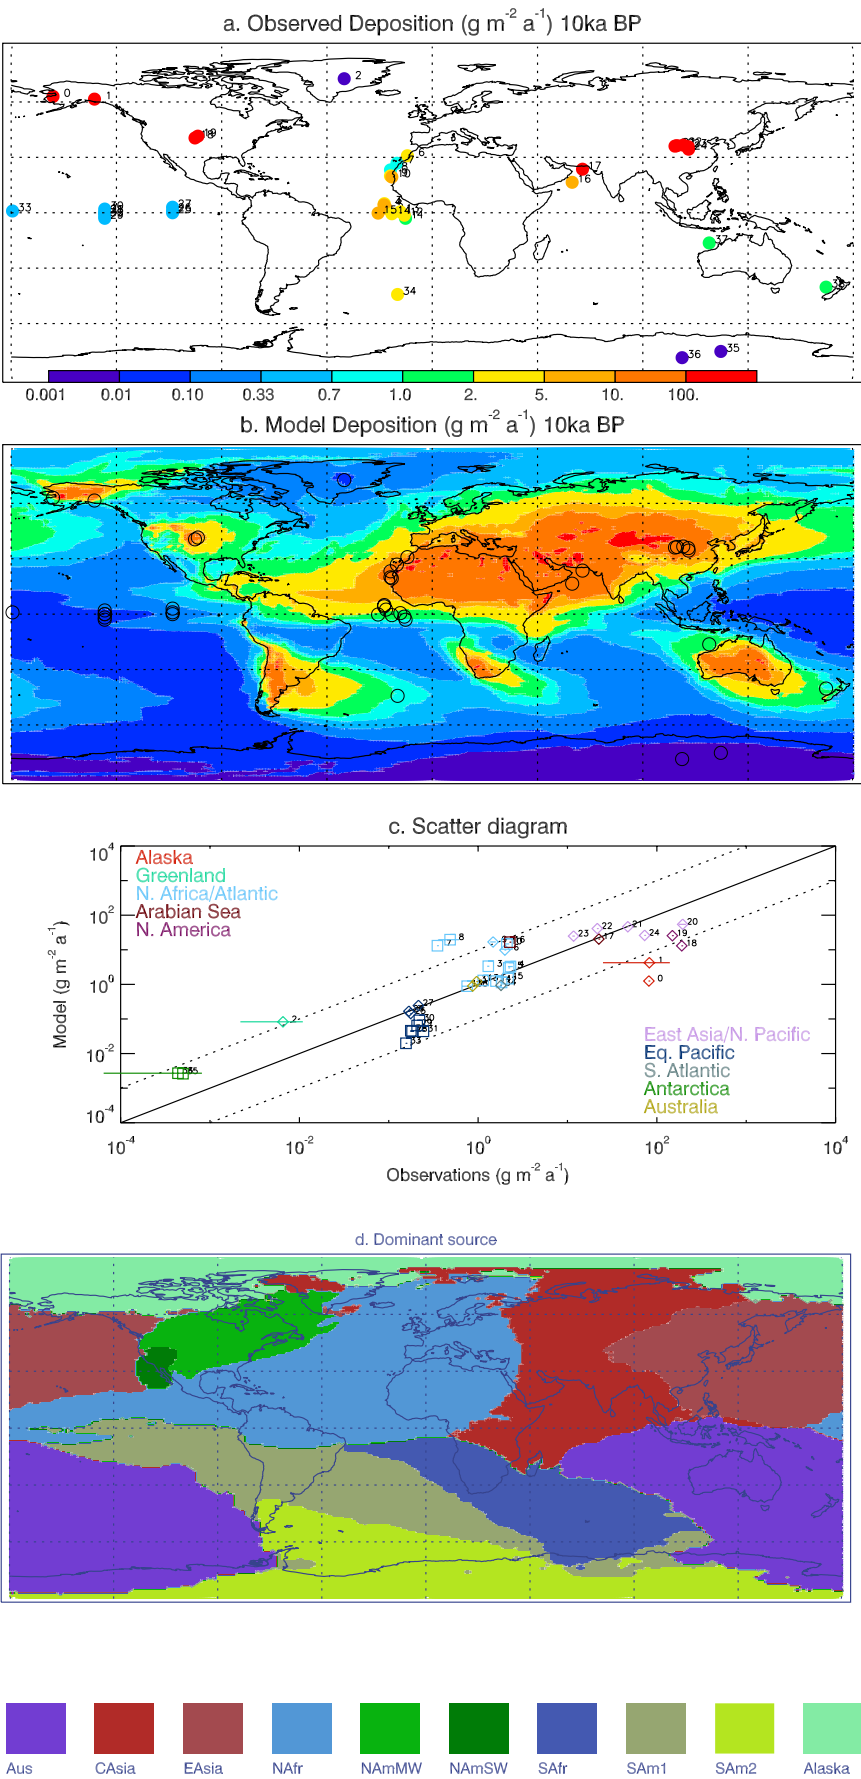

## Reference list

- Adkins, J., deMenocal, P. and Eshel, G.: The “African humid period” and the record of marine upwelling from excess  $^{230}\text{Th}$  in Ocean Drilling Program Hole 658C, *Paleoceanography*, 21(4), n/a–n/a, doi:10.1029/2005PA001200, 2006.
- Albani, S., Delmonte, B., Maggi, V., Baroni, C., Petit, J.-R., Stenni, B., Mazzola, C. and Frezzotti, M.: Interpreting last glacial to Holocene dust changes at Talos Dome (East Antarctica): implications for atmospheric variations from regional to hemispheric scales, *Clim. Past*, 8(2), 741–750, doi:10.5194/cp-8-741-2012, 2012.
- An, Z., Kukla, G., Porter, S. C. and Xiao, J.: Late quaternary dust flow on the chinese Loess Plateau, *CATENA*, 18(2), 125–132, doi:10.1016/0341-8162(91)90012-M, 1991.
- Anderson, R. F., Barker, S., Fleisher, M., Gersonde, R., Goldstein, S. L., Kuhn, G., Mortyn, P. G., Pahnke, K. and Sachs, J. P.: Biological response to millennial variability of dust and nutrient supply in the Subantarctic South Atlantic Ocean., *Philos. Trans. A. Math. Phys. Eng. Sci.*, 372(2019), 20130054, doi:10.1098/rsta.2013.0054, 2014.
- Anderson, R. F., Fleisher, M. Q. and Lao, Y.: Glacial–interglacial variability in the delivery of dust to the central equatorial Pacific Ocean, *Earth Planet. Sci. Lett.*, 242(3–4), 406–414, doi:10.1016/j.epsl.2005.11.061, 2006.
- Begét, J.: Middle Wisconsinan Climate Fluctuations Recorded in Central Alaskan Loess, *Géographie Phys. Quat.*, 44(1), 3, doi:10.7202/032793ar, 1990.
- Bory, A., Wolff, E., Mulvaney, R., Jagoutz, E., Wegner, A., Ruth, U. and Elderfield, H.: Multiple sources supply eolian mineral dust to the Atlantic sector of coastal Antarctica: Evidence from recent snow layers at the top of Berkner Island ice sheet, *Earth Planet. Sci. Lett.*, 291(1–4), 138–148, doi:10.1016/j.epsl.2010.01.006, 2010.
- Boven, K. L., and Rea, D. K.: Partitioning of eolian and hemipelagic sediment in eastern equatorial Pacific core TR 163-31B and the Late Quaternary paleoclimate of the northern Andes, *Journal of Sedimentary Research*, 68, 850–855, 1998.
- Box, M. R., Krom, M. D., Cliff, R. A., Bar-Matthews, M., Almogi-Labin, A., Ayalon, A. and Paterne, M.: Response of the Nile and its catchment to millennial-scale climatic change since the LGM from Sr isotopes and major elements of East Mediterranean sediments, *Quat. Sci. Rev.*, 30(3–4), 431–442, doi:10.1016/j.quascirev.2010.12.005, 2011.
- Bradt Miller, L. I., Anderson, R. F., Fleisher, M. Q. and Burckle, L. H.: Diatom productivity in the equatorial Pacific Ocean from the last glacial period to the present: A test of the silicic acid leakage hypothesis, *Paleoceanography*, 21(4), n/a–n/a, doi:10.1029/2006PA001282, 2006.
- Bradt Miller, L. I., Anderson, R. F., Fleisher, M. Q. and Burckle, L. H.: Opal burial in the equatorial Atlantic Ocean over the last 30 ka: Implications for glacial–interglacial changes in the ocean silicon cycle, *Paleoceanography*, 22(4), n/a–n/a, doi:10.1029/2007PA001443, 2007.
- Bronk Ramsey, C.: Radiocarbon calibration and analysis of stratigraphy : The OxCal Program, *Radiocarbon*, 37, 425–430 [online] Available from: <http://ci.nii.ac.jp/naid/80008936407/en/> (Accessed 25 July 2014), 1995.
- Brunelle, B.G. et al.: Evidence from diatom-bound nitrogen isotopes for subarctic Pacific stratification during the last ice age and a link to North Pacific denitrification changes, *Paleoceanography*, 22 (PA1215), doi:10.1029/2005PA001205, 2007.
- Brunelle, B.G. et al.: Glacial/interglacial changes in nutrient supply and stratification in the western subarctic North Pacific since the penultimate glacial maximum, *Quaternary Science Reviews*, 29, 2900–2929, 2010.
- Bullard, J. E.: Contemporary glacial inputs to the dust cycle, *Earth Surf. Process. Landforms*, 38(1), 71–89, doi:10.1002/esp.3315, 2013.
- Chase, Z., Anderson, R. F., Fleisher, M. Q., and Kubik, P. W.: Accumulation of biogenic and lithogenic material in the Pacific sector of the Southern Ocean during the past 30,000 years, *Deep-sea Research II*, 50, 799–832, 2003.
- Clemens, S. C. and Prell, W. L.: Late Pleistocene variability of Arabian Sea summer monsoon winds and continental aridity: Eolian records from the lithogenic component of deep-sea sediments, *Paleoceanography*, 5(2), 109–145, doi:10.1029/PA005i002p00109, 1990.
- Crusius, J., Pedersen, T. F., Kienast, S., Keigwin, L., Labeyrie, L.: Influence of northwest pacific productivity on north pacific intermediate water oxygen concentrations during the Boiling-Allerød interval (14.7–12.9 ka), *Geology*, 32(7), 633–636, 2004.
- Delmonte, B., Baroni, C., Andersson, P. S., Narcisi, B., Salvatore, M. C., Petit, J. R., Scarchilli, C., Frezzotti, M., Albani, S. and Maggi, V.: Modern and Holocene aeolian dust variability from Talos Dome (Northern Victoria Land) to the interior of the Antarctic ice sheet, *Quat. Sci. Rev.*, 64, 76–89, doi:10.1016/j.quascirev.2012.11.033, 2013.
- Delmonte, B., Baroni, C., Andersson, P. S., Schoberg, H., Hansson, M., Aciego, S., Petit, J.-R., Albani, S., Mazzola, C., Maggi, V. and Frezzotti, M.: Aeolian dust in the Talos Dome ice core (East Antarctica, Pacific/Ross Sea sector): Victoria Land versus remote sources over the last two climate cycles, *J. Quat. Sci.*, 25(8), 1327–1337, doi:10.1002/jqs.1418, 2010b.
- deMenocal, P., Ortiz, J., Guilderson, T., Adkins, J., Sarnthein, M., Baker, L. and Yarusinsky, M.: Abrupt onset and termination of the African Humid Period., *Quat. Sci. Rev.*, 19(1–5), 347–361, doi:10.1016/S0277-3791(99)00081-5, 2000.
- Ferrat, M., Weiss, D. J., Strekopytov, S., Dong, S., Chen, H., Najorka, J., Sun, Y., Gupta, S., Tada, R. and Sinha, R.: Improved provenance tracing of Asian dust sources using rare earth elements and selected trace elements for palaeomonsoon studies on the eastern Tibetan Plateau, *Geochim. Cosmochim. Acta*, 75(21), 6374–6399, doi:10.1016/j.gca.2011.08.025, 2011.
- Fischer, H., Fundel, F., Ruth, U., Twarloh, B., Wegner, A., Udisti, R., Becagli, S., Castellano, E., Morganti, A., Severi, M., Wolff, E., Littot, G., Röthlisberger, R., Mulvaney, R., Hutterli, M. A., Kaufmann, P., Federer, U., Lambert, F., Bigler, M., Hansson, M., Jonsell, U., de Angelis, M.,

- Boutron, C., Siggaard-Andersen, M.-L., Steffensen, J. P., Barbante, C., Gaspari, V., Gabrielli, P. and Wagenbach, D.: Reconstruction of millennial changes in dust emission, transport and regional sea ice coverage using the deep EPICA ice cores from the Atlantic and Indian Ocean sector of Antarctica, *Earth Planet. Sci. Lett.*, 260(1-2), 340–354, doi:10.1016/j.epsl.2007.06.014, 2007.
- Fitzsimmons, K. E., Cohen, T. J., Hesse, P. P., Jansen, J., Nanson, G. C., May, J.-H., Barrows, T. T., Haberlah, D., Hilgers, A., Kelly, T., Larsen, J., Lomax, J. and Treble, P.: Late Quaternary palaeoenvironmental change in the Australian drylands, *Quat. Sci. Rev.*, 74, 78–96, doi:10.1016/j.quascirev.2012.09.007, 2013.
- Francois, R., Bacon, M. P. and Suman, D. O.: Thorium 230 profiling in deep-sea sediments: High-resolution records of flux and dissolution of carbonate in the equatorial Atlantic during the last 24,000 years, *Paleoceanography*, 5(5), 761–787, doi:10.1029/PA005i005p00761, 1990.
- Fujii, Y., Kohno, M., Matoba, S., Motoyama, H., and Watanabe, O.: A 320 k-year record of microparticles in the Dome Fuji, Antarctica ice core measured by laser-light scattering, *Mem. Natl. Inst. Polar Res., Spec. Issue*, 57, 45–62, 2003.
- Gherardi, J. M., Labeyrie, L., McManus, J. F., Francois, R., Skinner, L. C., and Cortijo, E.: Evidence from the northeastern Atlantic Basin for variability in the rate of the meridional overturning circulation through the last deglaciation, *Earth Planet. Sci. Lett.*, 240, 710–723, doi:10.1016/j.epsl.2005.09.061, 2005.
- Hansson, M. E.: The Renland ice core. A Northern Hemisphere record of aerosol composition over 120,000 years, *Tellus B*, 46(5), 390–418, doi:10.1034/j.1600-0889.1994.t01-4-00005.x, 1994.
- Hesse, P. P.: The record of continental dust from Australia in Tasman Sea Sediments, *Quat. Sci. Rev.*, 13(3), 257–272, doi:10.1016/0277-3791(94)90029-9, 1994.
- Hesse, P. P. and McTainsh, G. H.: Australian dust deposits: modern processes and the Quaternary record, *Quat. Sci. Rev.*, 22(18-19), 2007–2035, doi:10.1016/S0277-3791(03)00164-1, 2003.
- Hovan, S. A., Rea, D. K. and Pisias, N. G.: Late Pleistocene Continental Climate and Oceanic Variability Recorded in Northwest Pacific Sediments, *Paleoceanography*, 6(3), 349–370, doi:10.1029/91PA00559, 1991.
- Jaccard, S. L. et al.: Subarctic Pacific evidence for a glacial deepening of the oceanic respired carbon pool, *Earth and Planetary Science Letters* 277, 156–165, 2009.
- Jia, R. F., Huang, C. C., Pang, J. L., and Niu, J. J.: Chronology of the Holocene loess–paleosol section and its deposition and pedogenesis on the south of Chinese Loess Plateau, *Journal of Geographical Sciences*, 18, 425–442, 2008.
- Jouzel, J., Vaikmae, R., Petit, J. R., Martin, M., Duclos, Y., Stievenard, M., Lorius, C., Toots, M., Mélières, M. A., Burckle, I. H., Barkov, N. Y., and Kotlyakov, V. M.: The two-step shape and timing of the last deglaciation in Antarctica, *Climate Dynamics*, 11, 151–161, 1995.
- Kang, S. G., Wang, X. L., and Lu, Y. C.: Quartz OSL chronology and dust accumulation rate changes since the Last Glacial at Weinan on the southeastern Chinese Loess Plateau, *Boreas*, 42, 815–829, 2013.
- Kawahata, H.: Fluctuations in the ocean environment within the Western Pacific Warm Pool during Late Pleistocene, *Paleoceanography*, 14(5), 639–652, doi:10.1029/1999PA000023, 1999.
- Kawahata, H.: Shifts in oceanic and atmospheric boundaries in the Tasman Sea (southwest Pacific) during the Late Pleistocene: Evidence from organic carbon and lithogenic fluxes, *Palaeogeogr. Palaeoclimatol. Palaeoecol.*, 184, 225–249, 2002.
- Kawahata, H., Okamoto, T., Matsumoto, E., and jiie, H.: Fluctuations of eolian flux and ocean productivity in the mid-latitude North Pacific during the last 200 kyr, *Quat. Sci. Rev.*, 9, 1279–1282, 2000.
- Kawamura, K., Nakazawa, T., Aoki, S., Sugawara, S., Fujii, Y., and Watanabe, O.: Atmospheric CO<sub>2</sub> variations over the last three glacial-interglacial climatic cycles deduced from the Dome Fuji deep ice core, Antarctica using a wet extraction technique, *Tellus*, 55B, 126–137, 2003.
- Kohfeld, K. E., Graham, R. M., de Boer, A. M., Sime, L. C., Wolff, E. W., Quéré, C. L., and Bopp, L.: Southern Hemisphere westerly wind changes during the Last Glacial Maximum: Paleo-data synthesis, *Quat. Sci. Rev.*, 68, 76–95, doi:10.1016/j.quascirev.2013.01.017, 2013.
- Kohfeld, K. E. and Harrison, S. P.: DIRTMAP: the geological record of dust, *Earth-Science Rev.*, 54(1-3), 81–114, doi:10.1016/S0012-8252(01)00042-3, 2001.
- Kohfeld, K. and Harrison, S. P.: Glacial-interglacial changes in dust deposition on the Chinese Loess Plateau, *Quat. Sci. Rev.*, 22(18-19), 1859–1878, doi:10.1016/S0277-3791(03)00166-5, 2003.
- Kylander, M. E., Bindler, R., Cortizas, A. M., Gallagher, K., Mörrth, C.-M. and Rauch, S.: A novel geochemical approach to paleorecords of dust deposition and effective humidity: 8500 years of peat accumulation at Store Mosse (the “Great Bog”), Sweden, *Quat. Sci. Rev.*, 69, 69–82, doi:10.1016/j.quascirev.2013.02.010, 2013.
- Le Roux, G., Fagel, N., De Vleeschouwer, F., Krachler, M., Debaille, V., Stille, P., Mattielli, N., van der Knaap, W. O., van Leeuwen, J. F. N. and Shotyk, W.: Volcano- and climate-driven changes in atmospheric dust sources and fluxes since the Late Glacial in Central Europe, *Geology*, 40(4), 335–338, doi:10.1130/G32586.1, 2012.
- Lu, H., Yi, S., Liu, Z., Mason, J. A., Jiang, D., Cheng, J., Stevens, T., Xu, Z., Zhang, E., Jin, L., Zhang, Z., Guo, Z., Wang, Y. and Otto-Bliesner, B.: Variation of East Asian monsoon precipitation during the past 21 k.y. and potential CO<sub>2</sub> forcing, *Geology*, 41(9), 1023–1026, doi:10.1130/G34488.1, 2013.

Maher, B. A., Prospero, J. M., Mackie, D., Gaiero, D., Hesse, P. P. and Balkanski, Y.: Global connections between aeolian dust, climate and ocean biogeochemistry at the present day and at the last glacial maximum, *Earth-Science Rev.*, 99(1-2), 61–97, doi:10.1016/j.earscirev.2009.12.001, 2010.

Marx, S. K., McGowan, H. A. and Kamber, B. S.: Long-range dust transport from eastern Australia: A proxy for Holocene aridity and ENSO-type climate variability, *Earth Planet. Sci. Lett.*, 282(1-4), 167–177, doi:10.1016/j.epsl.2009.03.013, 2009.

Mason, J. A., Miao, X., Hanson, P. R., Johnson, W. C., Jacobs, P. M. and Goble, R. J.: Loess record of the Pleistocene–Holocene transition on the northern and central Great Plains, USA, *Quat. Sci. Rev.*, 27(17-18), 1772–1783, doi:10.1016/j.quascirev.2008.07.004, 2008.

Mayewski, P. A., Meeker, L. D., Twickler, M. S., Whitlow, S., Yang, Q., Lyons, W. B. and Prentice, M.: Major features and forcing of high-latitude northern hemisphere atmospheric circulation using a 110,000-year-long glaciochemical series, *J. Geophys. Res.*, 102(C12), 26345, doi:10.1029/96JC03365, 1997.

Mayewski, P. A., Maasch, K. A., Dixon, D., Sneed, S. B., Oglesby, R., Korotkikh, E., Potocki, M., Grigholm, B., Kreutz, K., Kurbatov, A. V., Spaulding, N., Stager, J. C., Taylor, K. C., Steig, E. J., White, J., Bertler, N. A. N., Goodwin, I., Simões, J. C., Jaña, R., Kraus, S. and Fastook, J.: West Antarctica's sensitivity to natural and human-forced climate change over the Holocene, *J. Quaternary Sci.*, 28: 40–48. doi: 10.1002/jqs.2593, 2013.

McGee, D., deMenocal, P. B., Winckler, G., Stuut, J. B. W. and Bradtmiller, L. I.: The magnitude, timing and abruptness of changes in North African dust deposition over the last 20,000yr, *Earth Planet. Sci. Lett.*, 371–372, 163–176, doi:10.1016/j.epsl.2013.03.054, 2013.

McGee, D., Marcantonio, F. and Lynch-Stieglitz, J.: Deglacial changes in dust flux in the eastern equatorial Pacific, *Earth Planet. Sci. Lett.*, 257(1-2), 215–230, doi:10.1016/j.epsl.2007.02.033, 2007.

McGowan, H. A., Marx, S. K., Soderholm, J. and Denholm, J.: Evidence of solar and tropical-ocean forcing of hydroclimate cycles in southeastern Australia for the past 6500 years, *Geophys. Res. Lett.*, 37(10), n/a–n/a, doi:10.1029/2010GL042918, 2010.

McManus, J. F., Francois, R., Gherardi, J. M., Keigwin, L. D., and Brown-Leger, S.: Collapse and rapid resumption of Atlantic meridional circulation linked to deglacial climate changes, *Nature*, 428, 834–837, 2004.

Miao, X., Mason, J. A., Johnson, W. C. and Wang, H.: High-resolution proxy record of Holocene climate from a loess section in Southwestern Nebraska, USA, *Palaeogeogr. Palaeoclimatol. Palaeoecol.*, 245(3-4), 368–381, doi:10.1016/j.palaeo.2006.09.004, 2007.

Mix, A. C., and Ruddiman, W. F.: Structure and timing of the last deglaciation: oxygen-isotope evidence, *Quaternary Science Reviews*, 4, 59–108, 1985.

Muhs, D., Agera, T., Bettis III, E. A., McGehehinc, J., Beena, J. M., Begétd, J. E., Pavichc, M. J., Stafford, T. W. and Stevens, D. A. S. P.: Stratigraphy and palaeoclimatic significance of Late Quaternary loess–palaeosol sequences of the Last Interglacial–Glacial cycle in central Alaska, *Quat. Sci. Rev.*, 22(18-19), 1947–1986, doi:10.1016/S0277-3791(03)00167-7, 2003a.

Muhs, D. R., Ager, T. A., Been, J., Bradbury, J. P. and Dean, W. E.: A late quaternary record of eolian silt deposition in a maar lake, St. Michael Island, western Alaska, *Quat. Res.*, 60(1), 110–122, doi:10.1016/S0033-5894(03)00062-0, 2003b.

Muhs, D. R., Aleinikoff, J. N., Stafford, T. W. . J., Kihl, R., Been, J., Mahan, S. A. and Cowherd, S.: Late Quaternary loess in northeastern Colorado: Part I–Age and paleoclimatic significance, *Geol. Soc. Am. Bull.*, 111(12), 1861–1875, doi:10.1130/0016-7606(1999)111, 1999.

Nagashima, K., Tada, R., Matsui, H., Irino, T., Tani, A. and Toyoda, S.: Orbital- and millennial-scale variations in Asian dust transport path to the Japan Sea, *Palaeogeogr. Palaeoclimatol. Palaeoecol.*, 247(1-2), 144–161, doi:10.1016/j.palaeo.2006.11.027, 2007.

Olivarez, A. M., Owen, R. M. and Rea, D. K.: Geochemistry of eolian dust in Pacific pelagic sediments: Implications for paleoclimatic interpretations, *Geochim. Cosmochim. Acta*, 55(8), 2147–2158, doi:10.1016/0016-7037(91)90093-K, 1991.

Petherick, L. M., McGowan, H. A., and Kamber, B. S.: Reconstructing transport pathways for late Quaternary dust from eastern Australia using the composition of trace elements of long traveled dusts, *Geomorphology*, 105, 67–79, 2009.

Pourmand, A., Marcantonio, F., Bianchi, T. S., Canuel, E. A. and Waterson, E. J.: A 28-ka history of sea surface temperature, primary productivity and planktonic community variability in the western Arabian Sea, *Paleoceanography*, 22(4), n/a–n/a, doi:10.1029/2007PA001502, 2007.

Pourmand, A., Marcantonio, F. and Schulz, H.: Variations in productivity and eolian fluxes in the northeastern Arabian Sea during the past 110 ka, *Earth Planet. Sci. Lett.*, 221(1-4), 39–54, doi:10.1016/S0012-821X(04)00109-8, 2004.

Rea, D. K.: The paleoclimatic record provided by eolian deposition in the deep sea: The geologic history of wind, *Rev. Geophys.*, 32(2), 159, doi:10.1029/93RG03257, 1994.

Rea, D. K. and Hovan, S. A.: Grain size distribution and depositional processes of the mineral component of abyssal sediments: Lessons from the North Pacific, *Paleoceanography*, 10(2), 251–258, doi:10.1029/94PA03355, 1995.

Rea, D. K. and Janecek, T. R.: Late cretaceous history of eolian deposition in the mid-pacific mountains, central North Pacific Ocean, *Palaeogeogr. Palaeoclimatol. Palaeoecol.*, 36(1-2), 55–67, doi:10.1016/0031-0182(81)90048-1, 1981.

Rea, D. K., and Leinen, M.: Asian aridity and the zonal westerlies: Late Pleistocene and Holocene record of eolian deposition in the Northwest Pacific Ocean, *Palaeogeogr., Palaeoclim., Palaeoecol.*, 66, 1–8, 1988.

Roberts, H. M., Wintle, A. G., Maher, B. A. and Hu, M.: Holocene sediment-accumulation rates in the western Loess Plateau, China, and a 2500-year record of agricultural activity, revealed by OSL dating, *The Holocene*, 11(4), 477–483, doi:10.1191/095968301678302913, 2001.

Ruddiman, W. F.: Tropical Atlantic terrigenous fluxes since 25,000 yrs B.P., *Mar. Geol.*, 136, 189–207, 1997.

- Ruth, U., Barbante, C., Bigler, M., Delmonte, B., Fischer, H., Gabrielli, P., Gaspari, V., Kaufmann, P., Lambert, F., Maggi, V., Marino, F., Petit, J.-R., Udisti, R., Wagenbach, D., Wegner, A. and Wolff, E. W.: Proxies and Measurement Techniques for Mineral Dust in Antarctic Ice Cores, *Environ. Sci. Technol.*, 42(15), 5675–5681, doi:10.1021/es703078z, 2008.
- Ruth, U., Wagenbach, D., Bigler, M., Steffensen, J. P., Röthlisberger, R. and Miller, H.: High-resolution microparticle profiles at NorthGRIP, Greenland: case studies of the calcium-dust relationship, *Ann. Glaciol.*, 35(1), 237–242, doi:10.3189/172756402781817347, 2002.
- Sapkota, A., Cheburkin, A. K., Bonani, G. and Shotyk, W.: Six millennia of atmospheric dust deposition in southern South America (Isla Navarino, Chile), *The Holocene*, 17(5), 561–572, doi:10.1177/0959683607078981, 2007.
- Sirocko, F., Sarnthein, M., Lange, H. and Erlenkeuser, H.: Atmospheric summer circulation and coastal upwelling in the Arabian Sea during the Holocene and the last glaciation, *Quat. Res.*, 36(1), 72–93, doi:10.1016/0033-5894(91)90018-Z, 1991.
- Stevens, T. and Lu, H.: Optically stimulated luminescence dating as a tool for calculating sedimentation rates in Chinese loess: comparisons with grain-size records, *Sedimentology*, 56(4), 911–934, doi:10.1111/j.1365-3091.2008.01004.x, 2009.
- Stuiver, M., and Reimer, P. J.: Extended 14C data base and revised CALIB 3.0 14C age calibration program, *Radiocarbon*, 35(1):215–30, 1993.
- Sun, Y., Clemens, S. C., Morrill, C., Lin, X., Wang, X., and An, Z.: Influence of Atlantic meridional overturning circulation on the East Asian winter monsoon, *Nat. Geosci.*, 5, 46–49, doi:10.1038/NGEO1326, 2012.
- Thompson, L. G., Mosley-Thompson, E., Davis, M. E., Lin, P. N., Henderson, K. A., Cole-Dai, J., Bolzan, J. F. and Liu, K. B.: Late glacial stage and holocene tropical ice core records from Huascarán, Peru, *Science* (80-. ), 269(5220), 46–50, doi:10.1126/science.269.5220.46, 1995.
- Thompson, L. G., Yao, T., Davis, M. E., Henderson, K. A., Mosley-Thompson, E., Lin, P.-N., Beer, J., Synal, H.-A., Cole-Dai, J. and Bolzan, J. F.: Tropical Climate Instability: The Last Glacial Cycle from a Qinghai-Tibetan Ice Core, *Science* (80-. ), 276(5320), 1821–1825, doi:10.1126/science.276.5320.1821, 1997.
- Thompson, L. G., Yao T., Davis, M. E., Mosley-Thompson, E., Mashiotta, T. A., Lin, P., Mikhalevko, V. N., and Zagorodnov, V. S.: Holocene climate variability archived in the Puruogangri ice cap on the central Tibetan Plateau, *Ann. Glaciol.*, 43, 61–69, 2006.
- Thompson, L. G., Davis, M. E., Mosley-Thompson, E., Sowers, T. A., Henderson, K. A., Zagorodnov, V. S., Lin, P.-N., Mikhalevko, V. N., Campen, R. K., Bolzan, J. F., Cole-Dai, J., and Francou, B.: A 25,000-year tropical climate history from Bolivian ice cores, *Science*, 282, 1858–1864, 1998.
- Thompson, L. G., Mosley-Thompson, E., Davis, M. E., Henderson, K. A., Brecher, H. H., Zagorodnov, V. S., Mashiotta, T. A., Lin, P. N., Mikhalevko, V. N., Hardy, D. R., and Beer, J.: Kilimanjaro ice core records: evidence of Holocene climate change in tropical Africa, *Science*, 298, 589–593, 2002.
- Wu, G. J., Yao, T. D., Thompson, L. G., and Li, Z. Q.: Microparticle record in the Guliya ice core and its comparison with polar records since the last interglacial, *Chin. Sci. Bull.*, 49, 607–611, 2004.
- Xiao, L., Kumai, H., Yoshikawa, S., Masuda, H., and An, Z. S.: Eolian quartz flux to lake Biwa, central Japan, over the past 145,000 years, *Quat. Res.*, 48, 48–57, 1997.
- Yancheva, G., Nowaczyk, N. R., Mingham, J., Dulski, P., Schettler, G., Negendank, J. F. W., Liu, J., Sigman, D. M., Peterson, L. C., and Haug, G. H.: Influence of the intertropical convergence zone on the East Asian monsoon, *Nature*, 445, 74–77, 2007.
- Zdanowicz, C. M., Zielinski, G. A., Wake, C. P., Fisher, D. A. and Koerner, R. M.: A Holocene Record of Atmospheric Dust Deposition on the Penny Ice Cap, Baffin Island, Canada, *Quat. Res.*, 53(1), 62–69, doi:10.1006/qres.1999.2091, 2000.
- Zhao, H., Chen, F. H., Li, S. H., Wintle, A. G., Fan, X. Y., and Xia, D. S.: A record of Holocene climate change in the Guangzhong Basin, China, based on optical dating of a loess–palaeosol sequence, *The Holocene*, 17, 1015–1022, 2007.
- Zielinski, G. A. and Mershon, G. R.: Paleoenvironmental implications of the insoluble microparticle record in the GISP2 (Greenland) ice core during the rapidly changing climate of the Pleistocene-Holocene transition, *Geol. Soc. Am. Bull.*, 109(5), 547–559, doi:10.1130/0016-7606(1997)109, 1997.
