# Supplementary material for: Twelve thousand years of dust: the Holocene global dust cycle constrained by natural archives
Source: Copernicus journal article supplement (doi:10.5194/cp-11-869-2015), 2015-06-11
Supplement: Supplementary file 63 [file cp-11-869-2015-supplement.zip]

# OC437-07-GC37

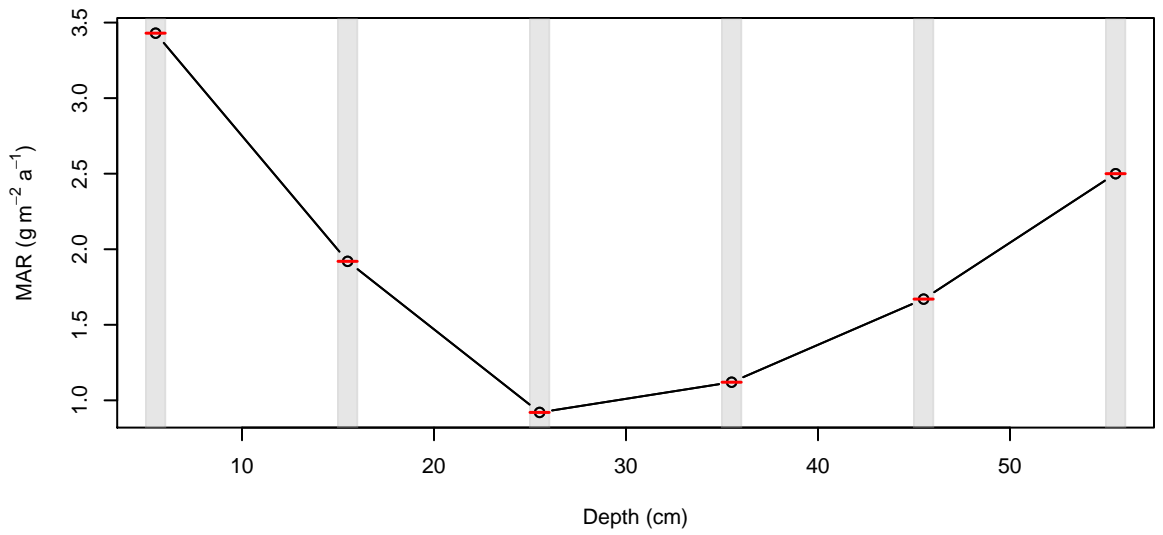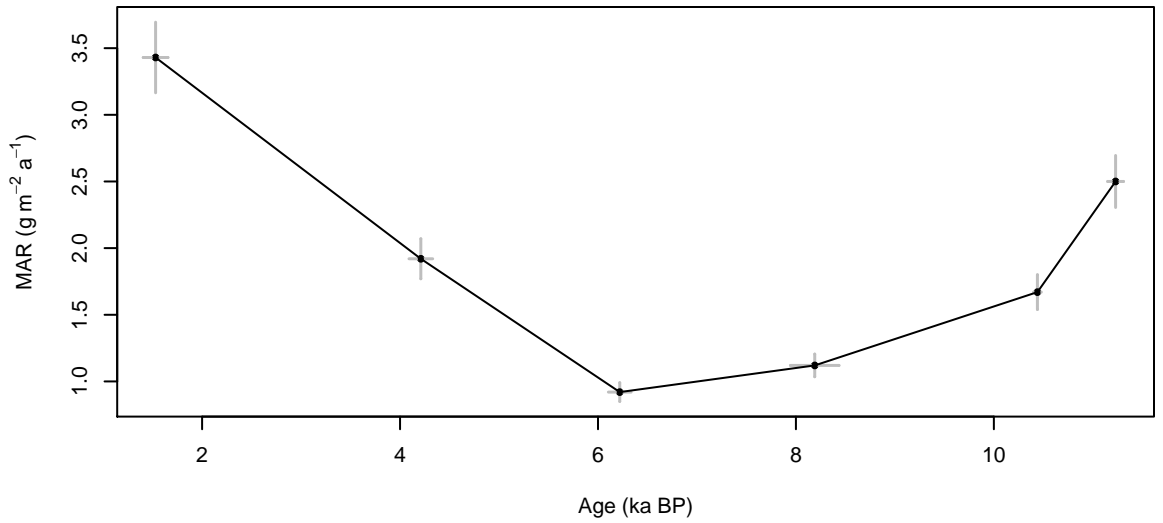

OC437-07-GC37

Reference: McGee et al. 2013

Depth: depths given in paper. Assume they are center, and assume thickness is 1 cm

Age: 14C

Age error: from 14C error

SBMAR: 230Th

SBMAR err: from xs-Th error

EC: end-member aeolian component of the terrigenous fraction

EC err: assume 15%

Size: Beckman-Coulter LS200 laser diffraction
