# Supplementary material for: Twelve thousand years of dust: the Holocene global dust cycle constrained by natural archives
Source: Copernicus journal article supplement (doi:10.5194/cp-11-869-2015), 2015-06-11
Supplement: Supplementary file 64 [file cp-11-869-2015-supplement.zip]

# 138-853B-1H-1

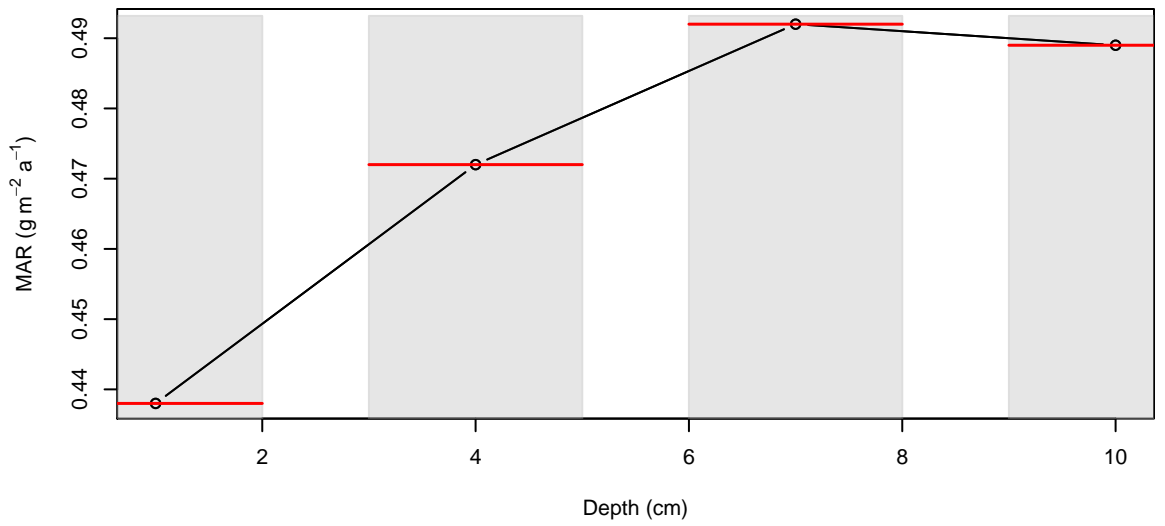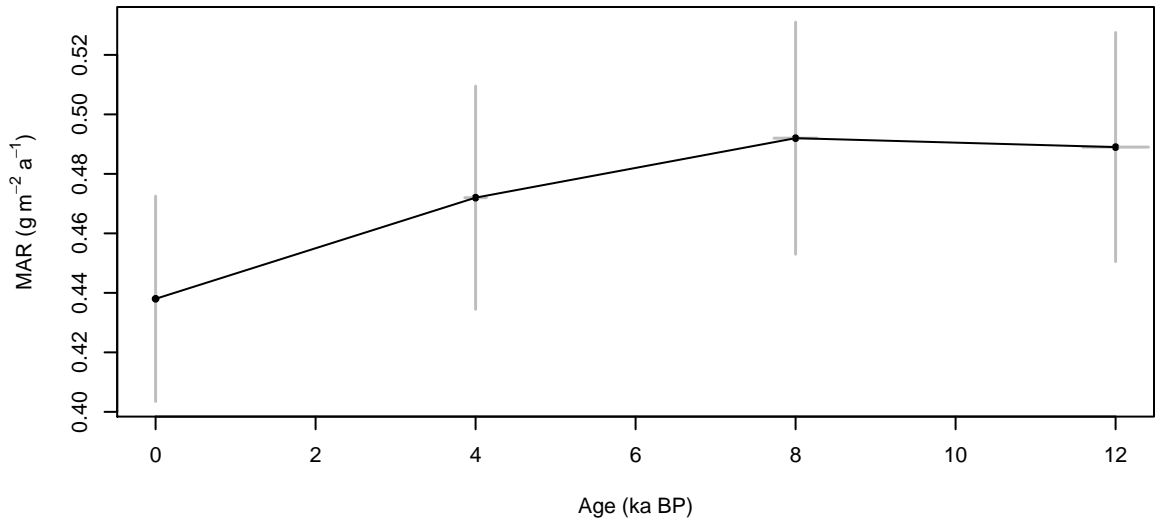

138-853B-1H-1

Reference: McGee et al. 2007

Depth: given in paper.

Age: from  $\delta^{18}\text{O}$ . Age reported as TOP, approximating to center.

Age error: assuming 6.8%

SBMAR:  $^{230}\text{Th}$

SBMAR err: assuming 5%

EC: based on  $^{232}\text{Th}$ , assuming 10.7 ppm in dust

EC err: assume 15%, including analytical + proxy uncertainty  $1/10.7$ , McGee et al. 2007
