# Supplementary material for: Twelve thousand years of dust: the Holocene global dust cycle constrained by natural archives
Source: Copernicus journal article supplement (doi:10.5194/cp-11-869-2015), 2015-06-11
Supplement: Supplementary file 66 [file cp-11-869-2015-supplement.zip]

## Jingyuan

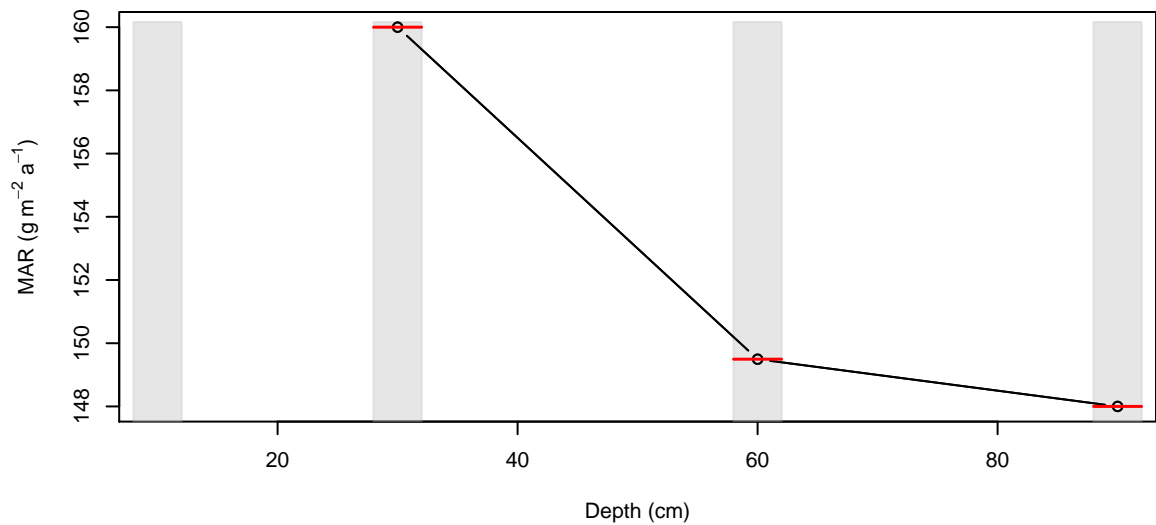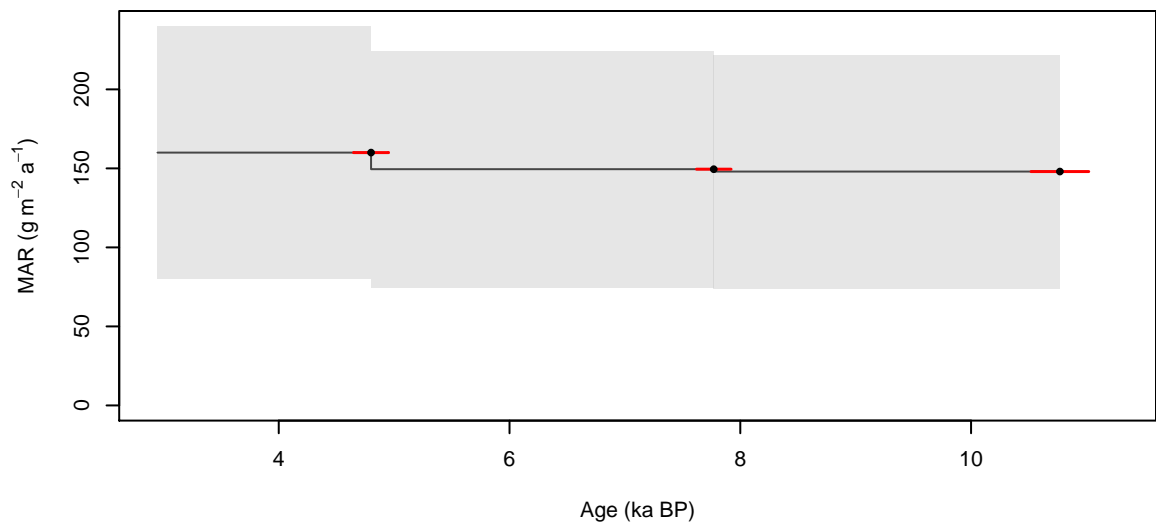

Jingyuan

Reference: Sun et al., 2012

Depth: OSL ages from depth interval few cm thick. Assuming that OSL depths are center, and the thickness of the sample used for analysis is 4 cm

Age: Ages are bottom ages for the sections. OSL smoothed ages (Sun et al., 2012)

SBMAR: LSR\*DBD

SBMAR err: From LSR and DBD

DBD: Assume 1.48 g/cm<sup>3</sup> (Kohfeld and Harrison, 2003)

DBD err: Assume 15% (Kohfeld and Harrison, 2003)

EC: Assume it is 1, organic content negligible (Derbyshire, 1982)

Size: Malvern 2000 laser counter after removal of organic matter and carbonate
