# Supplementary material for: Twelve thousand years of dust: the Holocene global dust cycle constrained by natural archives
Source: Copernicus journal article supplement (doi:10.5194/cp-11-869-2015), 2015-06-11
Supplement: Supplementary file 67 [file cp-11-869-2015-supplement.zip]

Sample 0.5

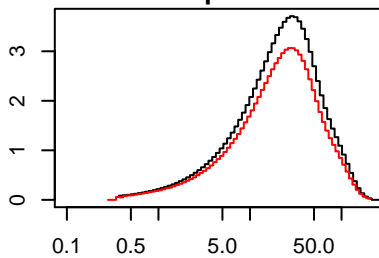

Sample 0.5 cumulative

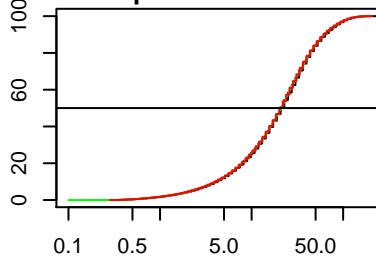

Sample statistics  
 Mass conserved = 1  
 Median(obs/new) = 21.21 / 21.01  
 1%(obs/new) = 0.74 / 0.73  
 5%(obs/new) = 2.26 / 2.27  
 25%(obs/new) = 10.06 / 9.74  
 75%(obs/new) = 37.12 / 38.18  
 95%(obs/new) = 85.94 / 82.26  
 99%(obs/new) = 124.77 / 126

Sample 10.5

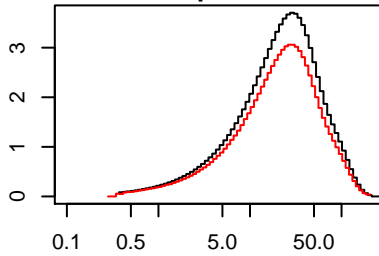

Sample 10.5 cumulative

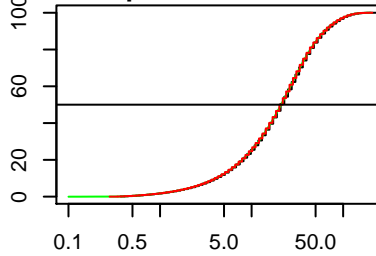

Sample statistics  
 Mass conserved = 1  
 Median(obs/new) = 21.21 / 21.01  
 1%(obs/new) = 0.74 / 0.73  
 5%(obs/new) = 2.26 / 2.27  
 25%(obs/new) = 10.06 / 9.74  
 75%(obs/new) = 37.12 / 38.18  
 95%(obs/new) = 85.94 / 82.26  
 99%(obs/new) = 124.77 / 126

Sample 20.5

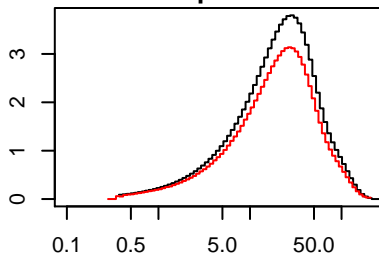

Sample 20.5 cumulative

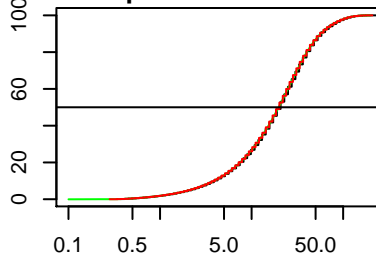

Sample statistics  
 Mass conserved = 1  
 Median(obs/new) = 19.32 / 19.29  
 1%(obs/new) = 0.68 / 0.73  
 5%(obs/new) = 2.06 / 2.08  
 25%(obs/new) = 9.16 / 9.74  
 75%(obs/new) = 33.82 / 35.05  
 95%(obs/new) = 78.28 / 75.53  
 99%(obs/new) = 113.7 / 115.7

Sample 30.5

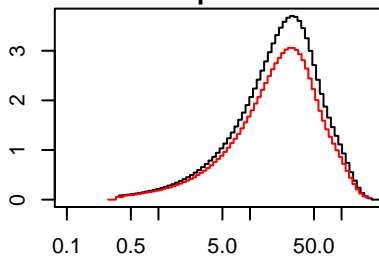

Sample 30.5 cumulative

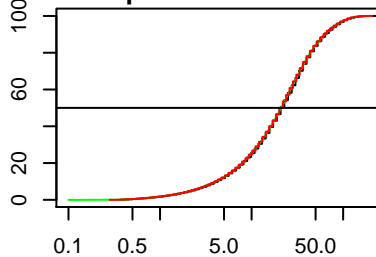

Sample statistics  
 Mass conserved = 1  
 Median(obs/new) = 21.21 / 21.01  
 1%(obs/new) = 0.74 / 0.73  
 5%(obs/new) = 2.26 / 2.27  
 25%(obs/new) = 10.06 / 9.74  
 75%(obs/new) = 37.12 / 38.18  
 95%(obs/new) = 85.94 / 82.26  
 99%(obs/new) = 124.77 / 126

Sample 40.5

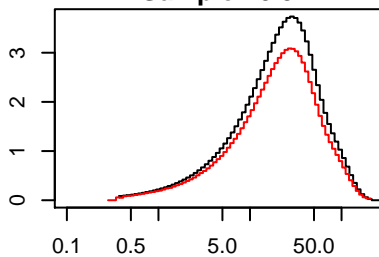

Sample 40.5 cumulative

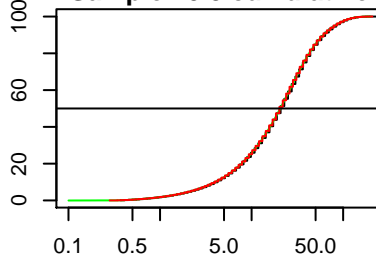

Sample statistics  
 Mass conserved = 1  
 Median(obs/new) = 21.21 / 21.01  
 1%(obs/new) = 0.74 / 0.73  
 5%(obs/new) = 2.26 / 2.27  
 25%(obs/new) = 10.06 / 9.74  
 75%(obs/new) = 37.12 / 38.18  
 95%(obs/new) = 78.28 / 82.26  
 99%(obs/new) = 124.77 / 126

Sample 50.5

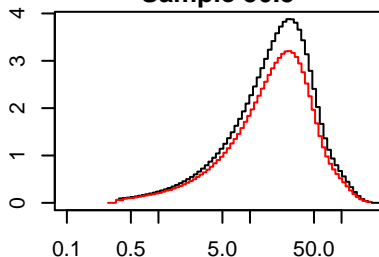

Sample 50.5 cumulative

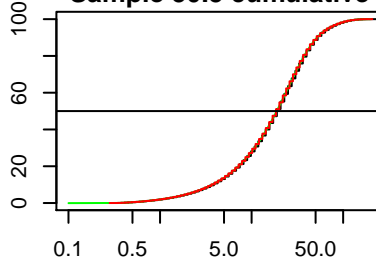

Sample statistics  
 Mass conserved = 1  
 Median(obs/new) = 19.32 / 19.29  
 1%(obs/new) = 0.68 / 0.67  
 5%(obs/new) = 2.06 / 2.08  
 25%(obs/new) = 9.16 / 8.94  
 75%(obs/new) = 33.82 / 32.19  
 95%(obs/new) = 71.31 / 69.36  
 99%(obs/new) = 113.7 / 115.7

Sample 60.5

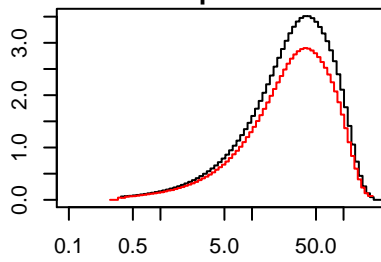

Sample 60.5 cumulative

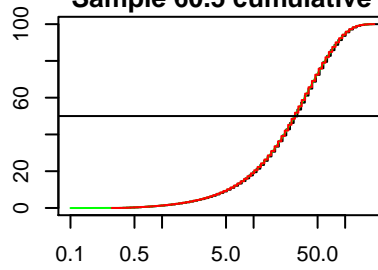

Sample statistics  
Mass conserved = 1  
Median(obs/new) = 28.06 / 27.14  
1%(obs/new) = 0.81 / 0.87  
5%(obs/new) = 2.73 / 2.7  
25%(obs/new) = 13.3 / 12.59  
75%(obs/new) = 53.91 / 53.7  
95%(obs/new) = 103.56 / 97.56  
99%(obs/new) = 136.97 / 137.21

5/25/50/75/95 percentiles

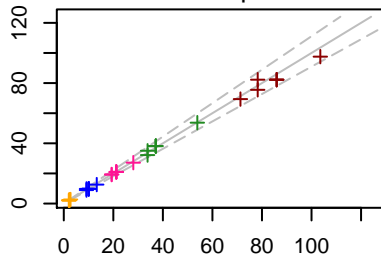

OC437-07-GC27 percentiles

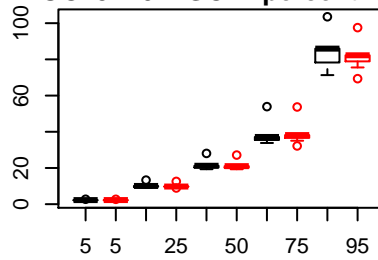

Site statistics  
Percentiles Pearson's corr. = 0.958  
Mean normalized bias = -0.01
