# Supplementary material for: Twelve thousand years of dust: the Holocene global dust cycle constrained by natural archives
Source: Copernicus journal article supplement (doi:10.5194/cp-11-869-2015), 2015-06-11
Supplement: Supplementary file 68 [file cp-11-869-2015-supplement.zip]

## Duowa

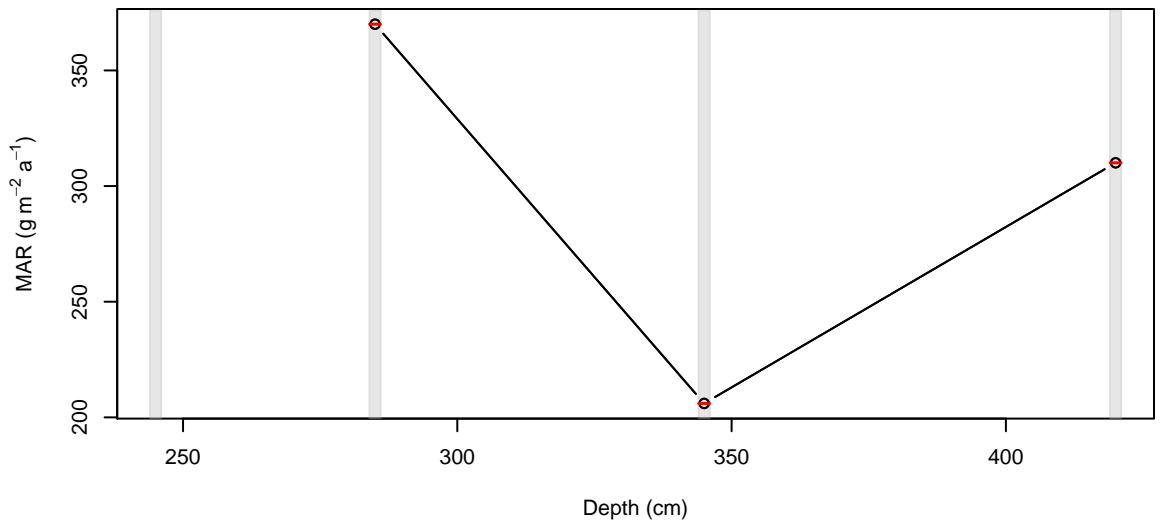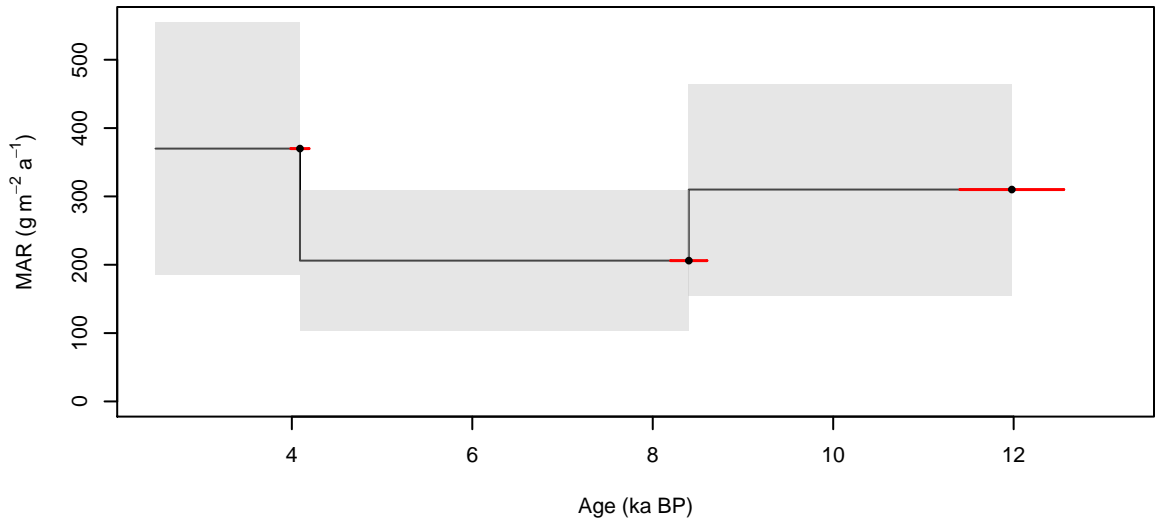

e: Roberts et al., 2001; Maher et al., 2003

SL ages from depth intervals few cm thick

ages. Age at soil horizon limits determined by a smoothing spline (sampling=0.35) age model between 245–285 cm

r: From OSL

SR\*DBD, with LSR for each soil horizon

r: From LSR and DBD

ume 1.48  $\text{g/cm}^3$  (Kohfeld and Harrison, 2003)

Assume 15% (Kohfeld and Harrison, 2003)

me it is 1, organic content negligible (Derbyshire, 1982)

erage estimates io of size classes based on Derbyshire, 1982
