# Supplementary material for: Twelve thousand years of dust: the Holocene global dust cycle constrained by natural archives
Source: Copernicus journal article supplement (doi:10.5194/cp-11-869-2015), 2015-06-11
Supplement: Supplementary file 70 [file cp-11-869-2015-supplement.zip]

## Chitina

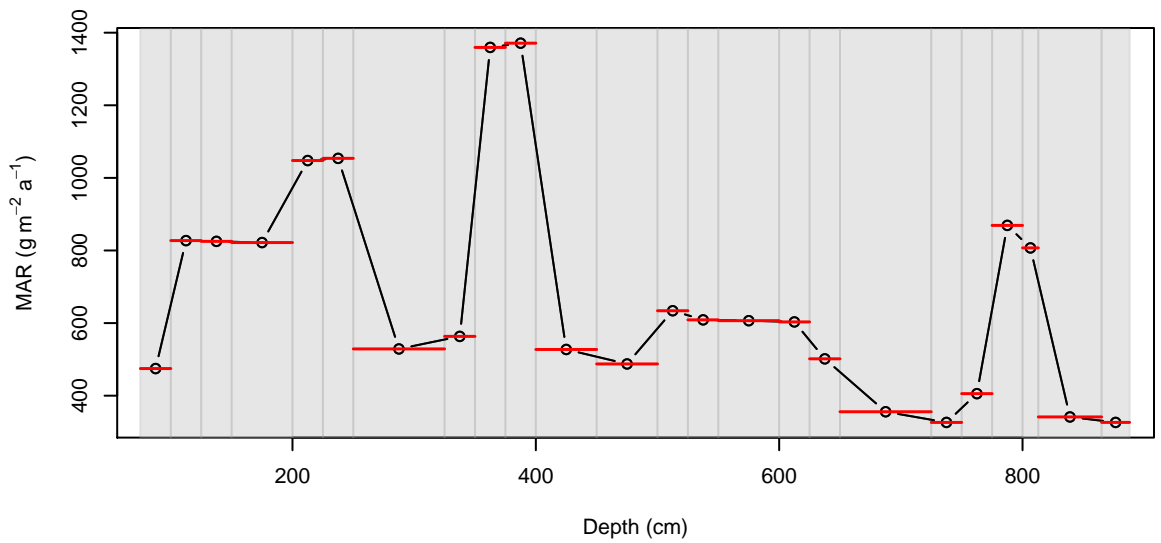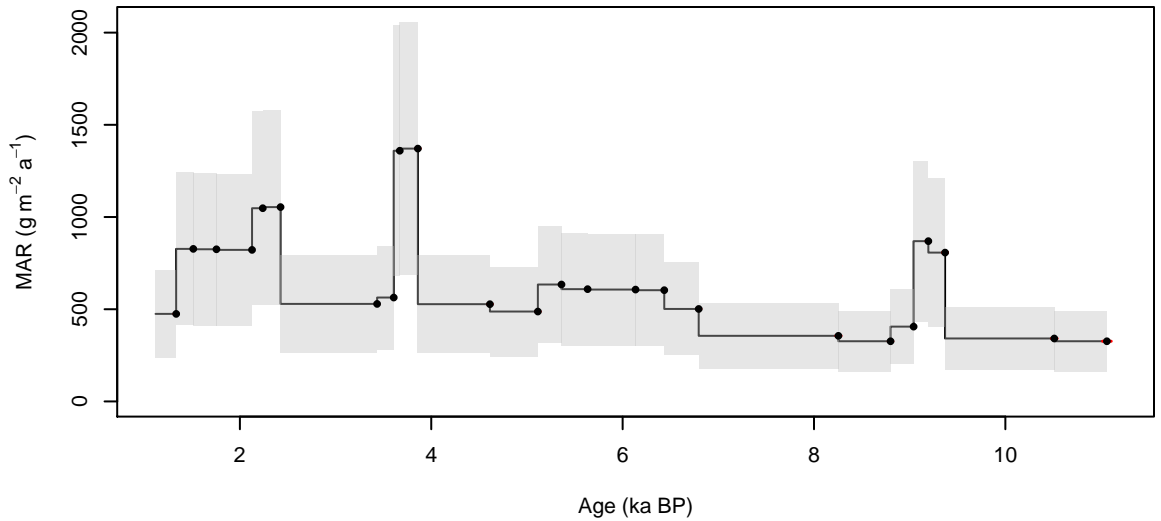

Chitina

Reference: Muhs et al., 2013

Depth: Given in paper

Age: Calibrated 14C ages (IntCal13) using software clam (Blaauw, 2010)

Age error: From clam

SBMAR: LSR between samples depth limits, with ages determined by clm (smooth spline with spar=0.3)

SBMAR err: From LSR and BD

DBD: Assume it is 0.75 g/cm<sup>3</sup> (Muhs et al., 2013)

DBD err: Assume it is 15% (Kohefled and Harrison, 2003)

EC: Average 0.88 for this section: organic matter content 12% (Muhs et al., 2013)

Size: Sieve and pipette
